# Supplementary material for: Evolutionary shifts in taste coding in the fruit pest Drosophila suzukii
Source: eLife. 2021 Feb 22;10:e64317. doi: 10.7554/eLife.64317 (PMC7899650; doi:10.7554/eLife.64317)
Supplement: Figure 1—source data 1. [file elife-64317-fig1-data1.xlsx]

## Sheet: Fig 1
Fig 1C	D. melanogaster
	S1	S2	S3	S4	S5	S6	S7
	1.01317	7.90274	0.810537	9.01722	8.81459	1.82371	70.618
	1.60116	15.1383	13.1004	15.575	15.4294	7.86026	31.2955
	23.4114	29.097	0.334448	4.34783	14.0468	0.668896	28.0936
	6.45933	10.0478	28.2297	7.17703	7.17703	0	40.9091
	0.21322	4.69083	0.639659	28.9979	12.7932	2.77186	49.8934
Fig 1D	D. suzukii
	S1	S2	S3	S4	S5	S6	S7
	24.2236	19.8758	15.528	6.8323	20.4969	9.93789	3.10559
	25	15.5172	7.75862	25	23.2759	2.58621	0.862069
	27.3585	9.90566	9.43396	5.18868	35.8491	5.18868	7.07547
	50.7353	6.25	5.88235	6.25	22.0588	4.41176	4.41176
	37.1287	24.7525	3.9604	12.3762	15.8416	3.46535	2.47525
Fig 1E	D. biarmipes
	S1	S2	S3	S4	S5	S6	S7
	0	0	21.7391	8.69565	60.8696	0	8.69565
	26.087	30.4348	13.0435	30.4348	0	0	0
	4.34783	28.2609	17.3913	19.5652	0	19.5652	10.8696
	7.84314	54.902	5.88235	5.88235	0	13.7255	11.7647
	22.9508	14.7541	27.8689	29.5082	4.91803	0	0
