# Supplementary material for: Evolutionary shifts in taste coding in the fruit pest Drosophila suzukii
Source: eLife. 2021 Feb 22;10:e64317. doi: 10.7554/eLife.64317 (PMC7899650; doi:10.7554/eLife.64317)
Supplement: Figure 6—source data 1. [file elife-64317-fig6-data1.xlsx]

## Sheet: Fig 6A
	D. melanogaster, ripe strawberry
	L1	L2	L3	L4	L5	L6	L7	L8	L9	S4	S8	I0	I1	I2	I3	I4	I5	I6	I7	I8	I9	I10	S0	S1	S2	S6	S7	S10	S3	S5	S9
	50	46	34	32	32	38	44	22	30	20	22	10	12	16	14	14	12	14	14	12	18	20	4	6	0	4	0	2	2	6	4
	28	32	30	24	44	24	38	36	30	24	16	10	10	14	20	14	10	12	32	20	16	16	4	8	0	2	4	4	6	2	0
	24	26	26	34	40	28	28	36	32	18	18	12	6	10	22	12	12	12	22	18	22	24	0	2	2	8	2	6	2	8	2
	24	28	36	40	42	42	38	36	30	20	18	10	8	10	12	20	10	10	30	18	16	14	8	6	10	4	0	6	4	2	0
	36	30	40	26	38	38	36	24	36	20	18	14	10	18	12	18	10	10	16	22	12	12	8	6	0	6	0	2	0	12	0
	46	44	28	30		40	50	38				10	6	18	10	18		18	32	18				4	2	6	0
	34	42	36	38			40	38				16				20		16	26	16						2	8
	30	30	38	32			43	34								14		24	16	20						4	2
	38	36	52				50	42								20		20	20							2
			46				48	44										20	18							0
			44				40	44										22	20							2
			48				40	44																		0
			36
			46
	D. melanogaster, overripe strawberry
	L1	L2	L3	L4	L5	L6	L7	L8	L9	S4	S8	I0	I1	I2	I3	I4	I5	I6	I7	I8	I9	I10	S0	S1	S2	S6	S7	S10A	S3A	S5A	S9
	42	42	56	36	40	38	44	38	44	14	16	16	22	32	30	44	28	24	24	30	28	26	6	10	16	12	8	12	12	16	14
	42	44	50	34	38	34	42	40	36	20	14	34	22	36	28	22	32	22	24	24	24	26	8	10	22	16	12	10	13	20	12
	40	44	56	46	44	38	40	58	46	22	14	18	26	28	28	26	22	44	36	20	26	24	10	12	24	14	10	10	14	14	18
	42	42	54	44	46	38	50	44	52	14	16	34	20	18	28	26	22	36	22	40	18	22	10	14	10	14	12	16	12	16	12
	36	36	46	54	48	42	48	38	42	14	18	34	32	40	44	22	20	24	26	34	34	22	18	14	18	14	10	12	10	14	14
	38	48		50			52	58	40			30				20	20	36	28	30	26					14				12	10
	34	48					42	36				30				30	20	26	22	38	30					12				10	12
		50					36	40				34					20	32	22		30					12				18	12
		52					38	36									20		18											15	14
							50	36											20												14
							42
	D. suzukii, ripe strawberry
	L1	L2	L3	L4	L5	L6	L7	L8	L9	S3	S7	I0	I1	I2	I3	I4	I5	I6	I7	I8	S1	S4	S6	S9	S2	S5	S8
	52	34	40	50	48	40	42	42	54	28	18	18	20	12	30	18	30	20	34	20	0	0	6	0	0	2	0
	40	32	46	58	42	32	46	54	50	20	22	22	16	24	12	18	20	18	20	22	0	0	4	0	0	0	2
	44	42	32	48	42	32	40	56	58	18	24	22	14	30	34	30	26	14	24	30	0	0	6	0	0	0	0
	36	38	50	46	38	42	40	56	44	20	20	16	24	10	16	40	34	22	30	18	0	0	2	0	0	0	0
	42	34	52	48	50	38	36	42	44	22	18	18	28	10	38	34	24	20	20	22	0	0	4	0	0	0	0
	50	36	46	48		62	46	56				20	20	12	14	26			24		0	2	4	0		0	0
		42	38	52			44	56				14	32	20	12	32						0	4			2	0
		50		48			40	56				18	14	40	16	20						0					0
				46			50	48					20	34	14	36						0					0
				42			38						30	26	16	34
													30	24	20
													28		20
															28
															16
															26
	D. suzukii, overripe strawberry
	L1	L2	L3	L4	L5	L6	L7	L8	L9	S3	S7	I0	I1	I2	I3	I4	I5	I6	I7	I8	S1	S4	S6	S9	S2	S5	S8
	44	42	44	50	38	34	48	50	42	20	24	36	32	42	40	48	22	38	38	28	2	0	4	0	0	0	0
	60	40	30	58	48	40	56	54	46	18	20	42	24	30	50	42	26	44	32	34	0	0	2	0	0	0	0
	48	58	46	50	38	32	54	56	50	18	28	36	26	32	28	26	36	44	32	44	2	0	4	0	0	0	0
	36	46	46	56	34	42	58	54	52	24	18	32	32	36	46	32	22	40	20	40	2	0	0	0	0	0	0
	38	38	40	38	34	36	46	52	38	20	22	26	38	34	34	22	36	32	20	32	0	0	2	0	0	0	0
					58	38	56	56					36	30	40	32	54	24	40	34
					36		42	54					26	32	40	34
					38			42						28	34	42
								52						36	54
								40
	D. biarmipes, ripe strawberry
	L1	L2	L3	L4	L5	L6	L7	L8	L9	S3	S7	I0	I1	I2	I3	I4	I5	I6	I7	I8	S1	S4	S6	S9	S2	S5	S8
	40	30	36	38	40	44	50	42	44	28	24	6	24	6	8	22	14	14	18	18	0	0	2	4	2	0	0
	42	38	44	28	44	36	42	40	54	30	26	14	26	4	16	16	10	8	14	10	6	8	0	2	0	0	0
	32	34	42	36	38	34	44	32	42	24	30	18	26	10	18	16	14	12	14	10	4	8	0	4	0	2	0
	44	42	58	32	40	34	38	56	48	22	28	20	30	12	10	14	14	12	12	10	0	0	0	4	0	2	2
	34	36	44	40	34	38	32	44	36	22	32	8	22	18	32	14	20	10	16	12	2	8	2	4	0	2	2
		46								28	34										2	2			0	0
		46																			0	0			0	0
		40																			2	12				0
																						2				0
	D. biarmipes,overripe strawberry
	L1	L2	L3	L4	L5	L6	L7	L8	L9	S3	S7	I0	I1	I2	I3	I4	I5	I6	I7	I8	S1	S4	S6	S9	S2	S5	S8
	40	28	38	34	40	38	48	28	40	20	30	26	38	24	26	28	22	24	32	24	8	10	10	4	0	0	0
	50	40	30	48	44	40	36	38	34	22	26	18	26	36	20	32	28	20	18	20	10	14	12	6	0	0	0
	42	40	34	28	32	28	36	32	30	25	30	20	24	24	36	18	18	30	24	30	8	12	12	8	0	0	0
	36	32	38	38	42	34	28	30	40	18	20	24	20	20	18	24	26	18	32	20	14	12	8	10	0	0	0
	38	32	26	36	36	34	32	56	30	30	22	20	24	20	22	20	24	22	28	24	8	14	8	8	0	0	2
	30	44					32						32	18							10	14	8	8	0	2
	40	42																			8	10			0	0
																					10	10			0	0
																					10	12
																					10

## Sheet: Fig 6D
	S5				S6				S7
	Control	Gr33a2	Gr33a3		Control	Gr33a2	Gr33a3		Control	Gr33a2	Gr33a3
	S5	S5	S5		10	0	0		18	0	0
	18	0	0		18	0	0		16	0	0
	10	4	2		10	2	2		22	0	0
	20	0	0		10	0	0		16	0	0
	14	2	2		10	6	0		10	0	0
	10	0	6		16	2	4		10	0	0
		0	2			0	0		14		2
			6			4	4		16		0
			2			0	2				0
			4			2	0				0
			2				2				0
			4				0				0
			2				0				2
			2				0
