# Supplementary material for: Evolutionary shifts in taste coding in the fruit pest Drosophila suzukii
Source: eLife. 2021 Feb 22;10:e64317. doi: 10.7554/eLife.64317 (PMC7899650; doi:10.7554/eLife.64317)
Supplement: Supplementary file 1. [file elife-64317-supp1.xlsx]

## Sheet: FPKM
gene_short_name	FPKM_Dmel	FPKM_Dmel	FPKM_Dmel
312	10.0455	10.3595	10.1003
2020-09-01	13.6541	13.8512	14.5548
2020-09-02	31.4879	32.9069	31.9409
2020-09-04	6.40955	7.36544	7.65945
2020-09-05	0.432948	0.515281	0.825212
2020-12-01	0	0.99583	10.9284
128up	30.9669	28.24	30.7436
14-3-3epsilon	250.304	225.834	238.547
14-3-3zeta	582.069	562.732	560.196
140up	14.3295	9.88031	12.0759
18w	7.58993	8.1002	8.68033
26-29-p	113.208	115.419	128.659
2mit	0.923531	1.10126	1.05207
4E-T	15.1457	25.2967	26.6766
5-HT1A	0.218164	0.386061	0.37564
5-HT1B	0.242338	0.204313	0.192452
5-HT2A	15.389	17.5426	18.0665
5-HT2B	1.17927	1.32988	1.43478
5-HT7	1.71009	2.0284	1.89901
5PtaseI	5.92322	7.31606	7.07908
7B2	29.1499	33.9943	35.9176
7SLRNA:CR32864	317.4	332.084	356.46
7SLRNA:CR42652	322.686	314.984	333.168
825-Oak	0	0	0
a	1.80351	2.00204	2.20177
a10	0	0	0.385411
A16	20.3906	19.9823	20.1532
a5	0	0	0.0970335
a6	4.67966	6.72324	6.55948
AANAT1	127.432	127.875	130.015
AANATL2	1.60826	0.82536	1.73934
AANATL3	0	0	0
AANATL4	0	0	0
AANATL5	0	0	0
AANATL6	0	0	0
AANATL7	0.131158	0	0.0378283
Aasdh	3.89703	4.06816	3.82553
Aatf	8.85987	7.08138	8.67972
aay	273.864	252.568	256.114
ab	0.783644	1.14887	1.14931
ABCA	29.9295	33.8668	33.5667
ABCB7	36.4045	35.0174	35.8092
ABCD	56.1336	96.8038	96.1646
abd-A	0	0.0242707	0.0146971
Abd-B	0	0.0179537	0
Abi	17.0059	20.0538	21.1193
Abl	35.7135	43.238	39.1264
abo	7.48136	8.16827	9.01056
Abp1	10.7221	12.1431	12.1493
abs	8.10697	7.00919	8.28629
ac	0	0	0
Ac13E	35.1263	42.0685	40.4254
Ac3	1.3873	1.97111	1.88119
Ac76E	9.53986	9.93194	10.2603
Ac78C	4.20008	4.68781	4.31297
Acam	0	0	0
Acbp1	91.2738	64.5072	63.6247
Acbp2	967.326	835.858	814.148
Acbp3	0	0.370651	0.278149
Acbp4	0	0	0
Acbp5	0	0	0
Acbp6	1.44585	1.73459	2.82893
ACC	78.5112	83.3562	81.1572
AcCoAS	162.253	158.439	176.005
Ace	47.9132	52.5311	50.4526
Acer	10.2545	10.1442	10.2893
Acf	6.53883	6.40819	7.4258
achi	4.02367	3.42087	3.43785
Achl	0.322565	0.324129	0.357239
acj6	1.40735	1.64343	1.64198
Ack	21.8475	21.9751	21.8952
Ack-like	8.67607	9.83592	10.4109
Acn	43.8913	36.6812	39.6761
Acox57D-d	6.59187	6.18191	8.06044
Acox57D-p	29.4911	26.5094	28.4156
Acp1	0	0	0
Acp24A4	0.399747	0.495953	0.413902
Acp26Aa	0	0	0
Acp26Ab	0	0	0
Acp29AB	0	0	0
Acp32CD	0	0	0
Acp33A	0	0	0
Acp36DE	0	0.0488751	0.0103951
Acp53C14a	0	0.184807	0
Acp53C14b	0	0	0
Acp53C14c	0	0	0
Acp53Ea	0	0	0.106806
Acp54A1	0	0.700194	0
Acp62F	0.220474	0	0
Acp63F	0	0	0
Acp65Aa	1.28943	1.18167	1.01855
Acp76A	0	0	0
Acp95EF	0.867954	0	0
Acp98AB	1.19016	0	0
Acph-1	13.5781	12.9913	15.4243
Acsl	126.189	130.732	127.214
Act42A	20.4202	17.6989	21.5169
Act57B	391.647	399.587	689.963
Act5C	673.806	765.739	661.389
Act79B	1.62175	1.46172	3.33014
Act87E	40.2469	31.4076	57.1041
Act88F	0.093263	0.074072	0.138484
Actbeta	3.44932	4.60041	4.71413
Actn	62.6663	63.286	87.8303
Actn3	0	0	0
ACXA	0	0	0.0083149
ACXB	0	0.0384839	0.0163584
ACXC	0.44649	0.521037	0.481884
ACXD	1.5247	1.32588	1.4219
ACXE	0	0	0
Acyp	0	0	0
Acyp2	18.9946	21.0551	23.5595
Ada	3.22564	2.2715	3.01007
Ada1-1	4.75572	4.04617	4.41112
Ada1-2	3.30291	3.39909	3.8375
Ada2a	5.16912	5.92522	5.75893
Ada2b	12.4499	13.786	15.0876
Ada3	5.83133	6.19113	7.18107
AdamTS-A	11.5681	11.461	11.8149
AdamTS-B	4.88725	6.17153	6.1953
Adar	17.3239	17.5485	18.6496
Adat1	5.44589	1.14361	1.18617
Adck	10.9588	10.6028	11.5188
ADD1	8.13636	7.06559	8.06904
AdenoK	34.6891	35.3458	36.7273
Adf1	20.2583	23.9295	23.962
Adgf-A	364.398	443.873	363.831
Adgf-A2	48.1013	54.1716	50.0399
Adgf-B	0.0871642	0	0
Adgf-C	13.7306	12.1352	13.0971
Adgf-D	4.51248	3.80269	4.3355
Adgf-E	0	0	0
Adh	323.162	325.943	466.51
Adhr	0	0	0
Adi1	115.261	93.2152	98.8804
AdipoR	131.024	142.079	153.079
Adk1	77.6598	66.072	83.0435
Adk2	70.4967	78.3165	85.71
Adk3	19.7145	18.0284	19.154
AdoR	4.66666	4.17393	4.23092
adp	16.2793	15.3545	15.6689
ADPS	3.42879	3.91853	3.30536
AdSL	12.6102	12.6826	14.1233
AdSS	255.157	287.868	268.016
Aduk	8.65712	9.29267	8.52122
Ady43A	6.45799	8.88698	8.28631
Aef1	20.2291	21.3627	22.9064
aft	5.51914	6.57505	6.78139
Afti	6.87807	8.23127	9.04482
Ag5r	0.238484	0.217935	0.110862
Ag5r2	0	0.0795741	0.0429559
AGBE	32.9295	33.3114	36.0216
AgmNAT	3.7367	2.72916	2.97496
ago	13.7181	16.5623	17.1752
AGO1	36.2054	47.8979	47.3738
AGO2	124.374	128.486	129.33
AGO3	0.458019	1.15477	2.45712
Agpat1	3.90756	3.63429	4.06832
Agpat2	62.5239	66.8793	68.3343
Agpat3	70.2707	81.8402	81.455
Agpat4	18.5378	21.1462	19.6511
agt	14.1017	14.8243	15.1799
Ahcy	25.1504	27.8005	31.9853
AhcyL1	40.9249	48.2206	48.5807
AhcyL2	2.67862	2.39514	2.52839
AIF	13.5719	12.819	13.5423
AIMP1	21.0061	22.2428	23.2443
AIMP2	28.4313	28.2304	28.4804
AIMP3	22.7834	22.8479	23.2099
Ak6	9.63128	9.09382	9.43211
Akap200	16.1291	12.8382	19.0523
Akh	0	0.998201	0.675607
AkhR	11.5474	14.6802	14.2174
akirin	68.8405	86.2858	91.7746
Akt1	19.1998	20.7682	22.5826
al	0.93334	1.17427	1.27018
Aladin	3.47145	4.15469	5.09352
AlaRS	30.4079	28.5814	29.635
AlaRS-m	9.86589	9.91595	10.0798
Alas	75.5311	75.677	75.9708
alc	95.6809	96.9725	105.193
Ald1	797.31	833.238	955.606
Ald2	0.0378733	0.0434683	0.0617959
Aldh	410.878	412.498	445.121
Aldh-III	456.239	435.672	429.697
Aldh7A1	2.34268	1.95191	2.88313
Alg-2	19.6468	34.0292	36.2192
Alg1	28.4856	32.1677	31.0463
Alg10	10.2962	9.31045	10.3459
Alg11	48.7369	49.7325	49.699
Alg14	10.8705	12.5955	13.7952
Alg2	18.2639	18.5495	18.0602
Alg3	8.31286	7.95267	7.77534
Alg9	6.98209	8.12226	8.39492
Alh	11.2072	14.1632	13.6132
alien	33.6935	33.9881	33.6261
ALiX	65.9939	69.2285	66.4695
Alk	1.12101	1.08492	1.61401
AlkB	5.91999	7.55737	8.11042
Alp1	0	0	0
Alp10	0	0.13342	0.0712045
Alp11	0.0712566	0	0.0201625
Alp12	3.72522	3.73131	3.93755
Alp13	0	0	0
Alp2	0.0417087	0	0
Alp4	16.805	13.6254	13.5038
Alp5	0	0.0350517	0.0374288
Alp6	0.262882	0.27815	0.315554
Alp7	0	0	0
Alp8	0.063567	0.0336149	0.0358819
Alp9	0	0.178049	0.120907
alph	62.4724	63.9525	67.498
alpha-Cat	28.484	43.0233	44.6551
alpha-Catr	11.1798	11.5886	12.1282
alpha-Est1	181.172	183.896	163.487
alpha-Est10	33.4864	29.129	28.3286
alpha-Est2	14.0278	11.1977	12.7084
alpha-Est3	28.6688	31.6789	29.5047
alpha-Est4	1.13547	1.43427	1.70891
alpha-Est4aPsi	0.0849584	0	0
alpha-Est5	4.57216	4.89412	4.9184
alpha-Est6	0	0	0
alpha-Est7	277.346	273.732	230.704
alpha-Est8	54.8646	53.0465	49.2114
alpha-Est9	15.0789	15.9172	18.8859
alpha-Man-Ia	16.567	17.4352	17.6884
alpha-Man-Ib	12.528	13.0433	13.8941
alpha-Man-Ic	0.0876273	0.0521531	0.037124
alpha-Man-IIa	9.3482	10.265	10.5579
alpha-Man-IIb	8.63674	9.52457	9.76895
alpha-PheRS	22.1537	22.4727	22.3373
alpha-Spec	115.54	133.067	129.471
alpha4GT1	15.1839	17.0971	16.3215
alpha4GT2	0	0	0
alphaCOP	60.6446	60.119	61.524
alphaKap4	0	0	0
alphaSnap	72.1096	67.0328	65.2341
alphaTry	0.582244	4.30369	0.253359
alphaTub67C	0.114794	0.710993	9.98999
alphaTub84B	361.271	419.096	450.255
alphaTub84D	57.3317	61.5677	67.6884
alphaTub85E	1.43443	0.987708	1.05545
Alr	20.6071	18.7655	21.2783
alrm	0.17172	0.255439	0.199976
Als2	18.2214	20.9509	19.2264
alt	34.1411	36.5561	38.5209
aly	0	0	0
Ama	0.048999	1.09815	0.0208224
Amacr	50.0233	47.0095	42.8545
amd	77.3915	89.2322	78.8698
amn	0.0262316	0.0137695	0
Amnionless	0.658759	0.442528	0.683607
amon	11.5826	12.3911	12.7204
amos	0	0	0
AMPdeam	60.868	55.221	60.0363
Amph	160.77	174.162	170.53
AMPKalpha	100.418	104.342	101.277
Amt	9.27823	10.1495	9.85041
Amun	62.7815	63.4988	63.9857
amx	14.0475	14.0523	13.7493
Amy-d	0.694076	0.863539	0.883231
Amy-p	0.396363	0.407927	0.652851
Amyrel	0.0481985	0.134044	0.0409284
ana	2.66937	5.92688	2.80086
ana1	5.12168	4.95832	4.91166
ana2	1.0298	1.34357	1.95282
ana3	0.578304	0.539392	1.18952
Ance	113.075	107.267	104.746
Ance-2	0.0646253	0.0511088	0.0680595
Ance-3	82.0003	87.2856	88.0466
Ance-4	2.5378	2.51251	2.77384
Ance-5	3.6638	2.64285	2.97454
anchor	44.6132	50.7567	46.7824
Andorra	0	0	0
angel	6.40996	5.91816	5.59051
Ank	47.7936	68.8763	74.1764
Ank2	14.2482	14.3165	15.4941
Ankle2	12.6781	12.6802	13.3563
anne	29.3661	56.5307	55.844
Anp	0	0	0
Ant2	1.28556	1.35752	1.47968
antdh	23.3953	30.4041	39.0413
Antp	4.10484	3.71379	4.65691
antr	0.967674	0.648295	0.970304
AnxB10	182.639	186.744	175.276
AnxB11	87.8701	92.5057	88.126
AnxB9	518.626	574.689	586.706
aop	11.2745	14.7484	14.6921
aos	18.4684	20.9987	17.7156
Aos1	20.1231	20.2461	21.2588
AOX1	106.249	113.58	109.607
AOX2	0.288777	0.427197	0.365961
AOX3	235.987	258.622	239.045
AOX4	0.0993694	0.0640269	0.0604625
ap	3.34338	2.69635	3.64765
AP-1-2beta	47.0616	51.334	50.9724
AP-1gamma	24.2873	25.9473	26.4056
AP-1mu	49.058	43.8755	46.5285
AP-1sigma	45.7966	61.33	58.0201
AP-2alpha	21.5613	23.0789	23.6063
AP-2mu	35.7931	36.8939	38.3169
AP-2sigma	49.983	46.6227	47.9753
Apc	5.41382	5.48283	5.98451
APC10	14.5038	14.1694	14.9137
Apc2	2.06509	1.91971	2.81332
APC4	4.05531	4.43427	4.99256
APC7	0.518271	0.822391	2.23791
ApepP	13.9942	14.8887	15.3949
Apf	14.2515	12.7198	12.8441
aph-1	19.1304	21.9382	20.7401
aPKC	11.2359	13.6293	14.8848
Apl	1.81322	2.32953	2.58229
Aplip1	4.74681	4.83544	5.49029
apn	0	0	0
apolpp	61.2451	97.5658	113.712
Apoltp	8.32655	7.55156	9.63333
app	27.7414	30.2971	27.8097
APP-BP1	9.06623	7.1444	8.48593
Appl	34.2219	40.9879	42.6636
Aprt	14.9731	17.8608	18.4765
Aps	69.6033	76.6636	80.8438
apt	4.81094	5.10446	6.2449
AQP	8.08092	11.2782	15.8839
aqrs	0	0	0.02672
aqz	180.868	224.805	223.297
ara	0.590413	0.417125	0.515646
aralar1	58.1921	63.936	64.9001
Arc1	106.939	95.5133	107.564
Arc2	10.1905	11.1827	13.5226
Arc42	56.1771	57.1977	59.3272
Archease	9.30881	8.06214	8.53347
Arf102F	123.913	153.926	163.881
Arf51F	61.0604	53.1439	53.8442
Arf79F	271.365	287.618	296.767
ArfGAP1	33.7187	36.0594	38.1168
ArfGAP3	39.3303	38.4458	42.344
Arfip	11.0514	12.5593	13.6648
Arfrp1	7.05709	8.54226	8.9564
arg	0.682816	1.46111	1.14116
Argk	2553.17	2785.28	3037.8
Argl	4.19385	3.68775	4.92064
ArgRS	15.9472	16.4891	15.6078
ArgRS-m	4.98641	5.67486	5.68813
ari-1	22.5543	25.2396	26.3655
ari-2	10.0092	11.5753	10.6268
Arl1	49.5632	49.8918	50.1021
Arl2	18.3691	16.3597	18.9827
Arl4	35.1938	50.7164	51.9272
Arl5	20.3817	23.3132	24.1806
Arl6	5.45734	5.66321	6.09323
Arl6IP1	36.3646	41.2255	42.0334
Arl8	56.7173	53.3206	53.4862
arm	118.787	118.492	115.084
armi	3.82508	3.13305	4.19506
Arp1	67.4173	66.055	65.3654
Arp10	29.401	33.799	33.7188
Arp2	32.6339	31.8691	32.8598
Arp3	29.9559	30.9416	30.9015
Arp5	7.08445	6.48624	6.29805
Arp53D	0	0	0
Arp6	24.7088	23.6011	25.8664
Arp8	6.14771	6.25796	6.52053
Arpc1	41.9007	42.0968	42.4885
Arpc2	24.6728	26.9322	32.0279
Arpc3A	16.0803	19.8485	18.6843
Arpc3B	5.08646	5.52457	5.33233
Arpc4	64.7494	60.961	63.4846
Arpc5	36.3214	31.1151	30.2755
arr	17.2686	19.89	17.5019
Arr1	0.0280515	0.773897	0.287
Arr2	0	1.24655	0.409897
Ars2	44.9207	41.3901	41.3481
Art1	20.314	17.0788	21.6016
Art2	0.0525332	0.0626962	0
Art3	8.07221	8.2307	8.4746
Art4	2.38507	3.10086	4.49574
Art6	0	0	0
Art7	6.26028	6.78342	6.6705
Art8	5.82974	5.2681	4.77041
Art9	0	0	0
Arts	10.1264	10.1378	11.0707
aru	79.0899	84.7191	75.451
Arv1	8.49031	11.6665	10.9802
arx	3.38277	3.28386	3.82272
ARY	0	0	0
Asap	15.9302	16.3603	16.3499
Asator	10.4027	11.4093	12.3131
Asciz	4.72767	4.35586	5.06594
ase	0	0.0347571	0
asf1	12.2034	13.9014	16.6508
ash1	6.73144	7.18938	7.6285
ash2	41.9048	38.984	38.9071
Ask1	15.5677	15.5967	16.3832
asl	1.54696	1.61755	2.23474
AsnRS	40.9373	42.3909	41.1174
AsnRS-m	6.28418	5.96428	5.96765
AsnS	21.4366	21.4504	21.6019
asp	0.0160719	0.105245	1.41127
Asph	19.5455	18.4483	26.4896
ASPP	18.7361	20.1773	20.1234
AspRS	39.26	38.0358	40.4183
AspRS-m	20.1198	21.3798	21.5967
asrij	26.6987	27.6764	30.7948
asRNA:ASTR	1.24824	0.482406	0.545769
asRNA:CR11538	0.478566	0.0590942	0
asRNA:CR17025	0.149961	0.0186199	0
asRNA:CR30267	0	0	0.0213422
asRNA:CR31144	1.30567	0.503137	0.47315
asRNA:CR31429	0.0846804	0.0167832	0
asRNA:CR31514	0.0550764	0.0173698	0.00923371
asRNA:CR31845	0.0959121	0	0
asRNA:CR31912	0.081934	0	0.0232661
asRNA:CR32224	0	0	0
asRNA:CR32252	0.0412415	0.0331092	0
asRNA:CR33945	0.21759	0.389739	0.208508
asRNA:CR42254	1.50993	1.87908	2.06904
asRNA:CR42547	0.534678	0.753509	0.692806
asRNA:CR42738	0	0	0
asRNA:CR42742	0	0	0
asRNA:CR42743	0	0.0192919	0
asRNA:CR42860	2.58024	3.43507	5.40251
asRNA:CR42871	0.0310359	0.0122677	0.104527
asRNA:CR43152	0	0.242189	0.0525218
asRNA:CR43159	0.19895	0.556307	0.42619
asRNA:CR43160	0	0	0
asRNA:CR43243	0	0.0498392	0.0540791
asRNA:CR43257	1.00718	1.47358	1.22892
asRNA:CR43259	0.183808	0.36213	0.418676
asRNA:CR43299	0	0	0
asRNA:CR43413	0	0	0
asRNA:CR43425	0.551816	0.450303	0.445539
asRNA:CR43426	4.94787	6.31359	6.13396
asRNA:CR43429	0.0466636	0.0122969	0
asRNA:CR43430	0.166505	0.0566915	0
asRNA:CR43433	0	0	0
asRNA:CR43454	0	0.205365	0.219865
asRNA:CR43460	0	0	0.220683
asRNA:CR43463	0.926717	0.624922	0.534785
asRNA:CR43464	0	0.0114981	0
asRNA:CR43465	0.23399	0.347228	0.114603
asRNA:CR43466	0.152398	0	0.136484
asRNA:CR43467	0.0271987	0.00988786	0
asRNA:CR43468	0	0	0.0296104
asRNA:CR43469	0	0	0.0138117
asRNA:CR43470	3.84265	0.194972	0.23369
asRNA:CR43471	0.152398	0	0
asRNA:CR43472	0	0	0
asRNA:CR43474	0.179895	0	0
asRNA:CR43476	0.0447067	0.0359662	0
asRNA:CR43477	0	0	0
asRNA:CR43478	0	0.0217799	0
asRNA:CR43480	1.36297	0.872743	0.724154
asRNA:CR43481	0.125104	0.0197423	0.081397
asRNA:CR43609	0.901223	0.725432	0.447412
asRNA:CR43614	0.1762	0	0
asRNA:CR43615	0	0	0
asRNA:CR43629	1.42034	2.06032	1.43649
asRNA:CR43636	0	0	0
asRNA:CR43637	0	0	0
asRNA:CR43683	1.01852	0.058235	0.156353
asRNA:CR43723	0.484169	0.663678	0.563852
asRNA:CR43728	0	0	0
asRNA:CR43730	1.26386	0.4609	0.358536
asRNA:CR43735	0	0	0
asRNA:CR43767	1.31977	0.133549	0.09635
asRNA:CR43786	0.429731	0	0.0830432
asRNA:CR43787	0.335127	0.0442372	0.0314484
asRNA:CR43806	0	0	0
asRNA:CR43809	0.314207	0.0356317	0.076107
asRNA:CR43812	0	0	0
asRNA:CR43820	0.0526222	0	0
asRNA:CR43824	0	0	0
asRNA:CR43833	0	0	0
asRNA:CR43842	0	0	0
asRNA:CR43864	0.968333	0.779081	0.840079
asRNA:CR43865	0	0	0
asRNA:CR43866	0.459325	0.474889	0.439115
asRNA:CR43868	0.360525	0.969424	0.901177
asRNA:CR43872	0.0872446	0.0295055	0
asRNA:CR43875	7.63458	6.95156	7.65798
asRNA:CR43876	0	0	0
asRNA:CR43877	0.197482	0.410737	0.634148
asRNA:CR43885	0.616606	1.04282	1.16281
asRNA:CR43889	0	0	0.0955091
asRNA:CR43891	0	0	0
asRNA:CR43898	0	0.0240277	0
asRNA:CR43903	0.0655966	0.0534469	0
asRNA:CR43906	2.2494	1.23627	1.47819
asRNA:CR43908	1.07248	0.529144	1.04678
asRNA:CR43916	1.94427	0.703901	0.798945
asRNA:CR43926	0	0	0
asRNA:CR43933	0.795409	0.680638	0.241523
asRNA:CR43936	0	0	0
asRNA:CR43944	4.40703	2.67029	2.77122
asRNA:CR43948	0	0	0
asRNA:CR43957	3.36674	6.0724	4.85665
asRNA:CR43959	0.327382	0.23294	0.281435
asRNA:CR43964	1.10475	0.179665	0.0853688
asRNA:CR43971	0	0	0.0435716
asRNA:CR43979	0.409165	0.0683421	0.0182403
asRNA:CR43981	0.272624	0	0
asRNA:CR44018	0.0052937	0.00415967	0.0220637
asRNA:CR44019	0.262356	0	0.876041
asRNA:CR44020	0	0	0.0900101
asRNA:CR44021	4.68801	0.710032	1.24238
asRNA:CR44027	0.435225	1.00627	0.709724
asRNA:CR44029	3.40873	4.3268	4.42745
asRNA:CR44030	12.9813	13.6092	15.652
asRNA:CR44031	0.60602	0.494303	0.119485
asRNA:CR44035	0.301613	0.239532	0.393677
asRNA:CR44045	0	0	0
asRNA:CR44046	0.0382749	0.0306727	0.109456
asRNA:CR44047	0.845764	1.16912	0.943501
asRNA:CR44049	0.613151	0.047028	0.100343
asRNA:CR44052	0	0	0
asRNA:CR44053	0.154103	0.152041	0.226469
asRNA:CR44054	0.664762	0.508813	0.60662
asRNA:CR44062	0.19895	0.0529816	0.0284127
asRNA:CR44063	0	0	0
asRNA:CR44064	0.0334611	0	0
asRNA:CR44065	0.475507	0.263542	0
asRNA:CR44067	0.740072	0.100258	0.108803
asRNA:CR44069	0.169046	0.0224419	0.168153
asRNA:CR44071	0	0	0
asRNA:CR44083	0.252618	0	0.0214762
asRNA:CR44087	0.175121	0.140064	0.210474
asRNA:CR44093	1.88468	0.638496	1.18785
asRNA:CR44095	23.3064	2.59985	3.00804
asRNA:CR44106	0	0	0.062111
asRNA:CR44107	2.12661	0.996096	1.45467
asRNA:CR44108	2.73987	0	1.67735
asRNA:CR44114	4.9975	0.956293	0.423144
asRNA:CR44115	0.798268	0.108464	0
asRNA:CR44116	0.08384	0.0331094	0.0234948
asRNA:CR44119	0.654658	0.449899	0.55214
asRNA:CR44124	0	0	0.170443
asRNA:CR44130	0	0	0
asRNA:CR44134	0.427257	0.0382557	0
asRNA:CR44137	1.02809	0.770655	0.399628
asRNA:CR44144	0	0	0
asRNA:CR44147	0	0	0.0976905
asRNA:CR44155	0	0	0.0178709
asRNA:CR44160	0.185835	0	0
asRNA:CR44165	0	0	0
asRNA:CR44168	0.542178	0.272357	0.100553
asRNA:CR44169	0.105069	0.0424084	0.0458536
asRNA:CR44176	0.292506	0.522053	0.874405
asRNA:CR44179	2.22022	0.9154	0.666186
asRNA:CR44181	5.9669	1.96112	1.35582
asRNA:CR44182	1.25738	0.0803619	0.442721
asRNA:CR44192	0	0	0
asRNA:CR44201	0.259019	0	0
asRNA:CR44205	0	0.0267099	0
asRNA:CR44207	0	0	0
asRNA:CR44224	0	0	0
asRNA:CR44228	0.315519	0.0468858	0
asRNA:CR44235	0.087506	0	0
asRNA:CR44237	0.0604809	0.144705	0.0775103
asRNA:CR44238	0	0	0
asRNA:CR44266	1.50385	0	0.0395412
asRNA:CR44267	0	0	0
asRNA:CR44275	0	0	0
asRNA:CR44287	0.0892923	0	0
asRNA:CR44291	2.20644	2.1552	2.95575
asRNA:CR44293	0	0.127776	0
asRNA:CR44297	0	0	0
asRNA:CR44304	0	0	0
asRNA:CR44321	2.67476	0.589767	1.05243
asRNA:CR44340	1.06679	0.624939	1.29659
asRNA:CR44351	0.448531	0.0396195	0.063531
asRNA:CR44358	0	0	0
asRNA:CR44367	0.264469	0.0264096	0.0283244
asRNA:CR44368	2.03952	1.69115	1.94446
asRNA:CR44370	0.00802299	0.0252579	0.0134114
asRNA:CR44372	0	0	0
asRNA:CR44374	1.88763	1.4187	1.18333
asRNA:CR44375	1.60263	1.54017	1.27151
asRNA:CR44381	0.742327	1.49407	1.93337
asRNA:CR44382	1.75795	1.47321	1.02047
asRNA:CR44386	0.087045	0.43126	0.315433
asRNA:CR44390	0.59904	1.02086	0.966141
asRNA:CR44416	0	0	0
asRNA:CR44427	0	0	0
asRNA:CR44429	3.71317	3.90306	3.06097
asRNA:CR44431	13.2948	2.15602	2.28752
asRNA:CR44509	626.781	27.9583	18.2424
asRNA:CR44512	0.600997	0.292823	0.370497
asRNA:CR44592	0	0	0
asRNA:CR44599	6.31946	6.6206	7.61772
asRNA:CR44600	1.05045	1.00057	1.32869
asRNA:CR44653	0	0.146239	0.166415
asRNA:CR44690	0.719818	0.678355	0.690376
asRNA:CR44703	0	0	0
asRNA:CR44704	6.96019	0.900031	0.6438
asRNA:CR44724	0	0.140349	0.188967
asRNA:CR44793	0	0	0
asRNA:CR44806	0	0.381468	0.430155
asRNA:CR44807	0.212944	0.0360669	0.128029
asRNA:CR44818	0	0	0
asRNA:CR44840	0	0	0
asRNA:CR44841	0	0.0195106	0
asRNA:CR44843	3.20234	1.83885	2.11133
asRNA:CR44847	0.124275	0	0.0548378
asRNA:CR44849	0	0	0
asRNA:CR44850	4.19933	0.0974236	0.158478
asRNA:CR44866	0	0	0
asRNA:CR44872	1.64065	1.25314	0.885649
asRNA:CR44873	0	0	0
asRNA:CR44891	3.74461	5.94788	5.53587
asRNA:CR44892	3.1814	2.86479	2.86688
asRNA:CR44894	0.441057	0.216802	0.210276
asRNA:CR44896	0.13477	0.574316	0.514998
asRNA:CR44897	0.51623	0.0186382	0.0398261
asRNA:CR44907	0.285984	0	0
asRNA:CR44910	0.593947	0.383327	0
asRNA:CR44911	0.0289406	0	0
asRNA:CR44958	0.0290425	0.0231454	0.0247836
asRNA:CR44959	0	0.0851181	0.188017
asRNA:CR44960	1.87376	0.5589	0.189573
asRNA:CR44961	0.346867	0.0709804	0.086308
asRNA:CR44962	4.09011	2.72696	2.77536
asRNA:CR44968	0.189559	0	0.173172
asRNA:CR44969	0.411476	0.269653	0.160952
asRNA:CR44972	0.292636	0	0
asRNA:CR44975	0	0	0.132444
asRNA:CR44976	0.182292	0.0493631	0.1071
asRNA:CR44981	0	0	0
asRNA:CR44982	0.357599	0.0739316	0.243589
asRNA:CR44984	0.21286	0.0342048	0.0368267
asRNA:CR44987	0.138617	0.0519645	0.154824
asRNA:CR44989	0.45453	0.572789	0.423932
asRNA:CR44990	0.727562	0.178296	0
asRNA:CR44992	0	0.13518	0.096113
asRNA:CR44995	0.163585	0	0
asRNA:CR44996	0.0226126	0.0538559	0
asRNA:CR44998	0.39169	0.0961109	0.246292
asRNA:CR45000	1.56402	0.585743	2.33009
asRNA:CR45001	0.278498	0	0
asRNA:CR45007	1.43846	0.0921278	0.157471
asRNA:CR45008	0	0.451659	0.532502
asRNA:CR45009	9.64365	7.47971	9.12156
asRNA:CR45015	0	0	0
asRNA:CR45016	0	0	0
asRNA:CR45024	0.0615576	0.200129	0.325762
asRNA:CR45026	0.440772	0	0.129385
asRNA:CR45028	0.135404	0	0.0391452
asRNA:CR45041	0	0	0
asRNA:CR45042	0.272124	0	0.0604075
asRNA:CR45044	0.0354868	0.0186618	0.00992366
asRNA:CR45046	1.83504	1.47113	2.20875
asRNA:CR45053	0.39226	0.0613454	0.0377412
asRNA:CR45056	0	0	0.04826
asRNA:CR45104	0	0	0
asRNA:CR45108	0.0836692	0.264825	0.197528
asRNA:CR45121	0	0.14537	0.0797773
asRNA:CR45124	1.13738	0.471913	1.2122
asRNA:CR45126	2.40305	3.48273	3.31903
asRNA:CR45129	0	0	0.0612117
asRNA:CR45130	0.192189	0.0511466	0.109665
asRNA:CR45131	0.151247	0.223385	0.269004
asRNA:CR45132	0.289318	0.240339	0.441295
asRNA:CR45133	0.15331	0.122299	0.111571
asRNA:CR45134	0.0706494	0.173231	0.377434
asRNA:CR45135	0	0.377097	0.218755
asRNA:CR45136	0	0	0
asRNA:CR45137	0	0	0.00396334
asRNA:CR45139	0.0366587	0.029349	0.0945682
asRNA:CR45140	0	0.0853564	0.0922874
asRNA:CR45141	0.375659	0.0876887	0.112363
asRNA:CR45142	0.13157	0.0650438	0.0277203
asRNA:CR45143	2.46966	5.7284	4.84295
asRNA:CR45144	0.523691	0.182997	0.392479
asRNA:CR45145	0.303439	0.08786	0.0705178
asRNA:CR45146	0	0	0
asRNA:CR45149	1.09984	0.168349	0.122164
asRNA:CR45151	0.194705	0.017165	0.0366516
asRNA:CR45152	2.03279	0.321007	0
asRNA:CR45160	0.876074	0.642247	0.508348
asRNA:CR45161	0.633892	1.4373	1.42607
asRNA:CR45162	1.44266	0.93067	0.206395
asRNA:CR45163	4.33728	4.76017	2.77993
asRNA:CR45164	0.594474	0.511717	0.661101
asRNA:CR45167	0	0	0
asRNA:CR45171	0.430004	0.720874	0.539152
asRNA:CR45175	5.14188	4.71942	4.51216
asRNA:CR45182	5.01599	17.0475	16.6233
asRNA:CR45185	0.107532	0.0932463	0.207269
asRNA:CR45189	0	0.0354239	0
asRNA:CR45190	0.345102	0.109616	0.058546
asRNA:CR45192	0	0	0
asRNA:CR45195	0.93071	1.31176	1.37419
asRNA:CR45198	1.26007	2.37712	1.81374
asRNA:CR45202	0.472497	0.27281	0.154501
asRNA:CR45205	0	0	0
asRNA:CR45206	0	0.0586639	0
asRNA:CR45208	0.128213	0	0.036976
asRNA:CR45209	0.0432677	0	0.0549773
asRNA:CR45210	0	0.0393628	0
asRNA:CR45213	0	0.024276	0.0260087
asRNA:CR45214	0.279595	0.0445357	0.143001
asRNA:CR45257	0	0	0
asRNA:CR45260	0	0	0
asRNA:CR45264	0.896596	0.0970577	0.210491
asRNA:CR45268	0	0	0
asRNA:CR45271	0	0	0
asRNA:CR45272	0	0.0154626	0
asRNA:CR45275	12.1492	19.2054	13.5207
asRNA:CR45281	0.158718	0.23104	0.191217
asRNA:CR45300	0.199874	0.178573	0.206261
asRNA:CR45305	0	0	0
asRNA:CR45326	0.111656	0	0
asRNA:CR45330	0.965846	2.2324	1.18642
asRNA:CR45341	0	0	0
asRNA:CR45342	0	0	0
asRNA:CR45343	0	0.0366809	0
asRNA:CR45350	11.4591	13.3529	13.9598
asRNA:CR45366	0.594485	0.119915	0.129477
asRNA:CR45367	0.188708	0.125507	0.0538078
asRNA:CR45371	0.0916438	0.0181921	0.0388643
asRNA:CR45376	0	0	0
asRNA:CR45384	0	0.156712	0.168485
asRNA:CR45396	4.57891	0.219694	0.418236
asRNA:CR45397	0.515567	0.451184	0.171479
asRNA:CR45445	0.0535621	0	0
asRNA:CR45466	0.217068	0.368925	0.190023
asRNA:CR45467	2.17814	2.55733	2.27554
asRNA:CR45468	0	0	0
asRNA:CR45469	0.159004	0.196012	0.285795
asRNA:CR45479	0.585908	0.759882	0.745947
asRNA:CR45481	0.0126402	0.00997565	0.0424509
asRNA:CR45485	0.699883	0.115066	0.225443
asRNA:CR45501	0.620761	0.0733029	0.402403
asRNA:CR45518	0.402161	0.167483	0.369699
asRNA:CR45520	0.199773	0.090179	0.0479996
asRNA:CR45525	0.809625	0.253464	0.148031
asRNA:CR45528	0.381049	0.10139	0.0543422
asRNA:CR45535	0.543397	0.617487	0.770416
asRNA:CR45538	0	1.20981	0.796442
asRNA:CR45549	0.0749874	0.430176	0.201213
asRNA:CR45600	9.61731	10.234	10.6623
asRNA:CR45601	102.684	7.80415	7.88277
asRNA:CR45604	0.425831	0.0452297	0.0479899
asRNA:CR45611	0	0.0442873	0
asRNA:CR45612	0	0	0
asRNA:CR45620	0.27398	0.145026	0.135544
asRNA:CR45621	0.0834217	0	0
asRNA:CR45623	0.327171	0	0
asRNA:CR45629	0.277351	0	0
asRNA:CR45648	0	0	0
asRNA:CR45663	0	0	0
asRNA:CR45682	16.0174	5.50985	5.00021
asRNA:CR45683	0.197821	0.131709	0.171631
asRNA:CR45686	0.23235	0.0374246	0.0403578
asRNA:CR45701	0.256736	0.239387	0
asRNA:CR45712	0.154178	0.0830254	0
asRNA:CR45713	0.0593921	0.047351	0
asRNA:CR45714	0.337045	0.0299962	0.0644565
asRNA:CR45715	0	0	0
asRNA:CR45738	0.128057	0.108637	0
asRNA:CR45778	0.166213	0	0
asRNA:CR45789	0	0.490857	0.461195
asRNA:CR45797	0	0	0
asRNA:CR45798	3.85055	0.130103	0.349899
asRNA:CR45800	0.956369	0.485288	0.736719
asRNA:CR45801	0.293025	0.0950934	0
asRNA:CR45802	0.477584	0	0
asRNA:CR45804	0.0935991	0.0376976	0.0813154
asRNA:CR45806	0.628843	0.03367	0.0362413
asRNA:CR45807	0.980215	0.102588	0.153589
asRNA:CR45812	0.0748174	0	0.0669069
asRNA:CR45813	0.241282	0.101831	0
asRNA:CR45814	0.250912	0.0510199	0
asRNA:CR45815	0.115209	0.290673	0.215285
asRNA:CR45818	4.67632	0.822137	0.922697
asRNA:CR45822	0.281997	0.0965304	0.0816796
asRNA:CR45827	0.0685206	0.0273893	0.0293894
asRNA:CR45828	0.74925	2.14874	0.693709
asRNA:CR45829	0	0	0
asRNA:CR45830	0.0442272	0	0
asRNA:CR45831	0.849465	0.19635	0.186764
asRNA:CR45832	0	0	0
asRNA:CR45834	0	0	0
asRNA:CR45835	2.6875	0.205502	0.234784
asRNA:CR45865	3.47761	1.18046	1.60361
asRNA:CR45867	0	0	0
asRNA:CR45868	0.0798869	0	0.0718236
asRNA:CR45869	0.41776	0.714327	0.133722
asRNA:CR45870	0.668218	0.503084	0.324881
asRNA:CR45871	0	0	0.0134579
asRNA:CR45872	9.42495e-10	0	0
asRNA:CR45873	14.662	12.5133	13.0547
asRNA:CR45874	2.52333	1.15108	1.49025
asRNA:CR45875	0.681169	0.519434	0.252875
asRNA:CR45882	0	0.0552761	0.060142
asRNA:CR45885	0.152217	0.213442	0.163843
asRNA:CR45886	0	0	0
asRNA:CR45889	0.167471	0.137999	0
asRNA:CR45890	0	0	0
asRNA:CR45891	2.14253	2.56955	2.67284
asRNA:CR45892	0.328529	0	0.0407789
asRNA:CR45894	0	0.469793	0
asRNA:CR45895	1.31395	0.651216	0.647456
asRNA:CR45896	0.768266	0.0817228	0.0745837
asRNA:CR45907	1.75215	2.11024	1.62671
asRNA:CR45908	0	0.100845	0.328369
asRNA:CR45909	0	0.11195	0.281674
asRNA:CR45912	0	0	0
asRNA:CR45924	1.28968	2.69501	0.658223
asRNA:CR45925	2.10131	1.86505	1.9504
asRNA:CR45926	2.78842	0.582286	0.374126
asRNA:CR45927	0	0	0
asRNA:CR45928	1.36498	1.1438	0.798874
asRNA:CR45929	0	0	0
asRNA:CR45943	1.73249	2.7281	3.09001
asRNA:CR45944	0.20934	0	0
asRNA:CR45951	0.109974	0.328359	0.327956
asRNA:CR45952	0.734204	0.112888	0.0603098
asRNA:CR45955	0.335316	0	0.0594881
asRNA:CR45960	0	0.0187192	0.0800016
asRNA:CR45968	0.170063	0	0.048341
asRNA:CR45969	0.544475	0.513635	2.45315
asRNA:CR45970	0.171658	0.0823424	0
asRNA:CR45974	0	0	0
asRNA:CR45995	2.82654	4.76543	3.93111
asRNA:CR45999	1.79597	1.39967	1.21877
asRNA:CR46012	0	0	0
asRNA:CR46018	0	0	0
asRNA:CR46020	0	0.0509194	0
asRNA:CR46029	0.0177319	0.048742	0.0516902
asRNA:CR46033	0.0794058	0.0318444	0
asRNA:CR46034	0	0	0
asRNA:CR46038	0.140646	0.0955632	0.0679758
asRNA:CR46044	0	0.297427	0
asRNA:CR46045	1.12799	0.0757266	0.0408398
asRNA:CR46047	0	0	0
asRNA:CR46048	0.22572	0.284302	0.210344
asRNA:CR46049	0	0	0
asRNA:CR46050	2.8684	0.614875	0.553558
asRNA:CR46054	0	0	0
asRNA:CR46055	0.655953	0.621658	1.28258
asRNA:CR46058	1.14817	0.245409	0.479135
asRNA:CR46065	0.876074	0	0.406679
asRNA:CR46066	0.0872842	0.105262	0.0377933
asRNA:CR46067	0.676786	0.13592	0.0731611
asRNA:CR46068	0	0	0
asRNA:CR46069	0.0475386	0	0
asRNA:CR46070	0.178672	0.0966945	0.209685
asRNA:CR46071	0.333839	0.135179	0
asRNA:CR46074	11.285	14.822	16.5746
asRNA:CR46081	0.604016	0	0.135136
asRNA:CR46082	0.137807	0	0.0115833
asRNA:CR46089	0.0472352	0.0371483	0
asRNA:CR46091	0	0	0
asRNA:CR46092	0.364965	0.0584325	0.0313781
asRNA:CR46093	1.38345	2.96296	2.24696
asRNA:CR46096	0.0829643	0	0
asRNA:CR46097	0.144078	0.0387141	0.0417752
asRNA:CR46099	0	0	0
asRNA:CR46101	0.187998	0	0
asRNA:CR46104	1.18398	1.10238	0.638041
asRNA:CR46105	0.470306	0	0
asRNA:CR46107	0.215034	0.0980249	0.288842
asRNA:CR46109	0.142419	0.114767	0.0412711
asRNA:CR46128	0.921472	0.820298	0.678472
asRNA:CR46129	0.720174	0	0
asRNA:CR46133	0.571067	0.567947	0.504668
asRNA:CR46134	0.507038	0.0267445	0
asRNA:CR46135	0.799006	0.155262	0.145684
asRNA:CR46136	0.0715679	0.0572671	0
asRNA:CR46137	0.573679	0.860825	0.830338
asRNA:CR46138	0.10167	0.0404253	0.0432239
asRNA:CR46139	1.49968	1.37628	1.57251
asRNA:CR46140	2.74208	0.177851	0.306582
asRNA:CR46144	0.191154	0.122545	0.0329264
asRNA:CR46145	0.0987841	0.0398484	0
asRNA:CR46195	1.11656	0.678258	1.32167
asRNA:CR46246	0.57938	0.308405	0.633747
asRNA:CR46251	0.303789	0.0160558	0
asRNA:CR46255	0	0	0
asRNA:CR46256	0.240822	0	0
asRNA:CR46261	0	0	0
asRNA:CR46262	2.32588	0.413809	0.576539
asRNA:CR46263	1.83063	1.94552	1.68449
asRNA:CR46264	0	0	0
asRNA:CR46266	0	0	0
asRNA:CR46269	10.6168	9.3287	11.1995
asRNA:CR46354	0.122521	0.0544875	0.0215256
asRNA:Eig63F-2	10.5154	6.1511	7.49021
asRNA:TS15	0	0	0
Ass	0.590575	1.06925	0.813814
ast	3.03542	2.92378	2.89474
AstA	0.188746	0.115721	0.161455
AstA-R1	0.151893	0.276699	0.180202
AstA-R2	0	0.0576017	0.030704
AstC	0	0	0
AstC-R1	0.193212	0.257228	0.324261
AstC-R2	0.18062	0.261931	0.152462
AstCC	0	0	0
asun	3.73054	3.58806	3.86748
Asx	8.77796	10.5906	10.7369
Atac1	6.00148	4.56401	5.45612
Atac2	3.20074	3.67762	3.6315
Atac3	6.37127	6.23657	5.87953
ATbp	1.87934	1.82311	1.88872
Ate1	24.4936	27.996	27.6131
Atet	30.707	30.1594	28.7523
Atf-2	5.78563	6.06985	6.18449
Atf3	46.9865	51.4632	54.5052
Atf6	10.5559	22.2056	23.3053
Atg1	33.4935	34.5763	30.5947
Atg10	1.26148	2.56629	1.91147
Atg101	16.6143	19.6652	19.8604
Atg12	25.541	19.7384	18.7252
Atg13	16.7817	19.5324	20.4976
Atg14	15.576	16.0804	16.3103
Atg16	8.99991	9.56527	9.54416
Atg17	15.7246	17.2376	18.0047
Atg18a	33.1075	40.025	39.5024
Atg18b	21.3844	29.9111	28.6319
Atg2	20.833	20.1538	20.5911
Atg3	36.3836	36.2519	38.0183
Atg4a	26.4443	25.1889	26.336
Atg4b	9.4791	10.6386	10.8859
Atg5	11.5925	13.5094	12.4326
Atg6	22.1873	22.1958	22.0423
Atg7	5.65988	5.63874	5.87804
Atg8a	504.759	566.846	530.349
Atg8b	2.22754	1.77244	2.53849
Atg9	20.2447	23.5408	23.4138
atilla	974.368	1049.15	1038.55
atk	0.0576729	0.0737267	0.066228
atl	137.025	147.498	142.46
atms	13.1009	13.5678	14.7614
ato	0	0	0
Atox1	71.6458	77.1027	78.4842
ATP6AP2	636.274	744.596	706.848
ATP7	29.6931	30.4594	31.2037
ATP8A	36.9578	37.789	36.1862
ATP8B	11.1347	11.2402	12.1167
Atpalpha	601.659	595.694	627.301
ATPCL	87.2985	77.6277	81.6682
ATPsynB	443.222	543.773	562.442
ATPsynbeta	1046.07	1095.21	1164.82
ATPsynbetaL	0.0533265	0.0703564	0.015
ATPsynC	1461.48	1583.64	1598.1
ATPsynCF6	438.074	381.877	372.476
ATPsynCF6L	0.145032	0	0
ATPsynD	511.022	518.493	527.527
ATPsyndelta	303.192	348.287	349.252
ATPsynE	439.122	438.547	481.087
ATPsynepsilonL	25.9863	22.5762	22.0638
ATPsynF	637.927	690.644	720.008
ATPsynG	653.809	595.095	647.529
ATPsyngamma	319.196	359.659	372.89
ATPsynGL	0	0	0
ATPsynO	390.573	457.086	458.45
att-ORFB	9.74113e-06	7.73785e-05	9.32846e-11
AttA	30.398	53.8714	48.9037
AttB	18.7221	42.2863	39.4773
AttC	17.8257	12.4689	19.289
AttD	1.40902	1.14322	1.70378
Atu	13.1296	14.1611	13.8014
Atx-1	0.13941	0.299397	0.282505
Atx2	32.4331	33.3176	34.3197
Atxn7	5.99593	7.17975	6.63036
aub	0.0748376	0.226381	0.837645
aurA	0.519556	0.844199	1.90421
aurB	0.0657877	0.446681	1.04261
aust	0	0	0
aux	15.7973	16.1704	16.4642
ave	14.421	13.6465	16.0573
Aven	7.30148	6.55722	6.66091
awd	766.384	807.992	858.555
Awh	0	0.0280921	0
axed	1.62588	1.22302	1.45471
Axn	11.3886	11.8208	13.9263
axo	9.91145	10.5429	11.7216
Axs	11.02	10.9764	12.7362
Axud1	8.35395	9.40872	9.37527
az2	3.99293	3.19	3.91948
azot	0	0	0
b	75.775	96.3796	101.993
B-H1	7.90883	9.8511	9.35828
B-H2	4.24522	5.99195	5.99258
B4	34.2703	40.9873	40.7073
B52	89.0174	99.5252	98.7984
b6	0.0505226	0	0
B9d1	0.376533	0.568783	1.10432
B9d2	2.37749	1.72947	2.13221
bab1	0.327375	0.443942	0.573048
bab2	10.9133	13.2821	12.9562
babo	13.8988	16.8009	16.0237
babos	12.1261	12.2377	14.4376
Bacc	422.947	450.437	459.562
Bace	0.549874	4.08096	0.138467
baf	82.6708	73.4837	82.5607
bai	141.975	143.777	145.968
Balat	0.0560126	0	0
Baldspot	179.417	218.165	216.397
ball	3.32686	2.72203	4.08919
bam	0.112089	0.0591855	0.552252
bap	0	0	0
Bap111	15.4214	15.6088	17.0329
Bap170	7.16206	7.4498	8.01904
Bap55	15.6667	16.5988	15.5138
Bap60	29.8914	31.0132	31.0261
barc	25.2274	20.3652	20.4093
bark	6.79062	8.48345	7.96379
barr	5.57514	5.93573	5.62351
baz	12.6246	15.2113	16.3223
bb8	0.0204282	0.0323935	0.0691353
bbc	41.7242	47.4897	49.963
bbg	9.99818	11.0175	11.6223
BBS1	1.58931	1.17495	1.06081
BBS4	5.51506	4.63803	4.79021
BBS5	6.54812	6.50756	6.22092
BBS8	3.77677	3.62627	3.40829
BBS9	7.42801	7.12005	6.81238
bbx	27.0282	28.8167	29.8241
bc10	44.6768	40.3881	46.4995
BCAS2	7.54014	8.25656	9.29276
bcd	0.0502378	0.0607744	0.841342
bchs	6.03602	7.13732	6.96397
BCL7-like	2.42324	3.35265	4.82388
bcn92	29.6835	21.8606	22.6669
Bdbt	18.1865	14.5915	15.4519
bdg	9.34392	9.55968	9.8472
bdl	14.6713	16.4416	15.6139
Bdp1	12.0936	9.63576	9.19471
be	14.5692	15.9245	15.4478
BEAF-32	22.9487	23.2811	21.9802
beag	13.4912	11.7959	11.5666
beat-Ia	0.260453	0.264242	0.353967
beat-Ib	0.245043	0.602068	0.51489
beat-Ic	0	0.00807671	0.0171692
beat-IIa	0.274291	0.380506	0.35532
beat-IIb	0.349114	0.230474	0.425436
beat-IIIa	0.492325	0.65642	0.658067
beat-IIIb	1.06422	1.35587	1.35131
beat-IIIc	2.55895	3.01372	2.75846
beat-IV	2.60715	3.30839	2.93843
beat-Va	0	0.0151162	0
beat-Vb	0	0.0361034	0.0192802
beat-Vc	0	0	0
beat-VI	0.571044	0.589242	0.448941
beat-VII	1.57809	1.66231	1.84671
beg	11.246	11.698	11.6272
bel	90.3104	100.491	93.2644
Bem46	8.10775	9.8543	8.71222
ben	166.842	160.873	171.814
Best1	53.83	63.9258	61.688
Best2	64.3255	76.0707	66.409
Best3	0	0	0
Best4	0	0	0.0188693
Bet1	46.4073	45.5659	48.9592
Bet3	22.8856	24.2414	23.1659
Bet5	15.2654	12.3518	12.0992
beta-Man	41.7373	41.9841	41.9134
beta-PheRS	17.6819	16.6897	19.0018
beta-Spec	123.938	135.942	136.682
beta'COP	62.095	60.6089	60.4612
beta3GalTII	4.7998	4.57452	5.07263
beta4GalNAcTA	16.7793	17.6205	18.3834
beta4GalNAcTB	10.781	12.3195	12.5134
beta4GalT7	8.90339	7.41209	7.58846
betaCOP	69.9758	72.3764	70.5711
betaggt-I	10.4839	10.6605	11.1966
betaggt-II	15.6666	16.8648	15.2154
betaGlu	15.5983	15.0942	15.5844
betaNACtes1	0	0	0
betaNACtes2	0	0	0
betaNACtes3	0	0.03367	0
betaNACtes4	0	0	0
betaNACtes5	0	0	0
betaNACtes6	0	0	0
betaTry	0.729726	9.05617	0.409763
betaTub56D	321.868	342.609	375.554
betaTub60D	8.93624	7.8409	8.86772
betaTub85D	0	0	0.0839786
betaTub97EF	34.4016	37.7259	40.3332
BG642163	0.0815264	0.021632	0
BG642167	0.320974	0	0
BG642312	2.65433	0.340465	0.940081
Bgb	9.19562	8.08099	8.5537
bgcn	0.0665563	0.0851497	0.0486861
bgm	14.1999	12.3511	17.7139
BHD	5.4627	5.31114	5.49246
bi	6.09345	8.71094	8.41322
BI-1	190.144	235.562	228.153
bib	0.170495	0.37799	0.178586
bic	339.548	288.825	308.374
BicC	0.0116242	0.519618	11.4676
BicD	20.8841	23.8229	25.4772
bif	10.9236	10.7996	13.3031
BigH1	0.150102	0.646345	8.30835
bigmax	22.9334	22.9818	24.3753
Bili	1.32166	1.58347	1.74758
bin	0	0	0
Bin1	14.2375	14.0354	15.3287
bin3	10.2677	11.7431	12.8292
bip1	2.86569	1.95212	3.06995
bip2	19.7989	33.3139	35.4995
Bka	11.9876	11.66	13.7319
blanks	1.12198	1.03996	1.42506
Blimp-1	18.945	20.5248	18.6942
Blm	1.39778	1.49223	2.08439
Blos1	22.73	25.9231	23.7592
Blos2	22.8481	18.6198	19.781
Blos3	9.79411	11.2009	11.7386
Blos4	5.99284	6.52293	8.14219
blot	48.7061	57.7142	59.0495
blow	7.956	8.46351	7.13342
blp	20.3853	22.2093	21.8433
blw	712.957	802.704	817.068
bma	0.619844	0.611126	0.734342
Bmcp	16.5874	15.1958	15.4931
bmm	24.2039	22.1344	28.3709
bnb	52.0255	61.0796	58.5899
bnk	0	0	0.0335318
bnl	16.6842	19.6668	17.5514
BobA	0	0.483581	0
boca	57.1745	55.1663	56.7306
bocks	16.0529	14.6011	15.2796
BOD1	17.9644	18.3023	17.735
boi	1.25402	1.04311	1.85628
boil	0.093329	0.0370625	0.118787
bol	12.1191	15.3639	18.1498
boly	0	0	0
bon	11.8214	13.6208	13.9746
bond	21.277	24.6688	23.7798
bonsai	30.2335	24.6017	27.8603
bor	13.1696	13.3741	14.7927
bora	0	0.157704	1.16166
BORCS5	9.28136	8.57026	9.2496
BORCS6	7.01592	6.04654	6.12159
BORCS7	4.84444	4.87576	5.03686
borr	0	0.39992	1.44194
boss	3.59837	3.83014	3.31127
botv	7.574	8.15024	8.51556
bou	125.671	101.981	95.0222
bowl	20.5294	23.4435	20.6164
BoYb	0	0.0153844	0.482283
br	0.113715	0.22784	0.239605
Br140	5.87457	7.47366	7.54136
brat	2.1876	2.31627	4.7729
Brca2	3.91308	4.37177	5.41146
Brd	0	0.466243	0
Brd8	4.19333	4.51548	4.63417
Bre1	11.5638	10.9464	12.8555
Brf	5.15586	5.52598	5.73282
brk	7.79344	8.88007	8.07389
brm	27.7756	26.8978	26.858
Brms1	24.4772	23.3922	25.0461
brn	5.66319	5.14564	5.17158
Bro	0	0	0
brp	5.33936	5.89721	6.30932
bru1	3.47245	6.00944	15.7541
bru2	16.5684	18.7842	21.3896
bru3	4.38105	5.52196	6.02402
Bruce	26.9744	30.1525	30.1348
brun	11.5593	12.5451	12.8611
brv1	0	0.0104475	0
brv2	0	0	0
brv3	0	0	0.0247041
BRWD3	12.2453	11.9296	12.8235
brwl	7.9628	7.35989	8.21956
bs	6.04488	6.73827	6.89336
bsf	25.4545	25.5536	25.3032
Bsg	135.895	142.909	150.399
Bsg25A	0	0	0
Bsg25D	17.9429	19.9976	20.7215
bsh	0	0	0
bsk	39.7906	43.204	42.6731
bt	21.4528	25.7405	39.5006
BTBD9	12.214	11.1934	13.8528
BtbVII	32.5636	36.5009	37.7137
btd	3.09065	3.13751	3.10584
BthD	0	0.0664739	0.679583
Btk29A	37.5241	40.0336	37.1214
btl	16.8416	18.2606	16.2951
btn	0	0.093067	0
Btnd	0.0382067	0.121075	0.0161417
btsz	52.704	59.459	58.4902
btv	2.37489	2.66989	2.64062
btz	16.4724	17.2088	18.9257
Bub1	6.11652	5.81189	6.69161
Bub3	14.6025	15.8356	15.5795
BubR1	1.37275	1.45367	1.74791
Buffy	45.7595	46.5676	45.2167
bug	19.1111	20.131	21.2418
Bug22	19.2858	18.0736	17.7425
BuGZ	31.0074	33.3574	34.7585
bun	104.533	133.866	147.227
bur	28.2263	29.1678	28.8675
Burs	0	0.0586639	0
bves	14.6156	19.0066	18.1385
bw	0.0426962	0.022485	0.0598408
bwa	7.23612	7.15411	6.1436
Bx	8.89298	10.6885	9.63613
Bx42	27.899	25.9819	27.6273
by	64.2752	73.1128	73.2802
byn	0	0	0
bys	15.9288	13.112	14.1622
c-cup	0	0	0
c(2)M	0.110921	0.100235	0.253579
c(3)G	2.33696	2.78438	3.1127
c11.1	16.0255	18.7807	19.1926
c12.1	14.3297	14.8655	15.7975
c12.2	20.8922	23.3123	22.5496
C15	1.0236	1.23242	1.49782
C1GalTA	20.9484	23.0448	24.9571
C3G	11.7635	12.0912	13.7899
C901	0	0.0149851	0.0319628
ca	12.4273	13.4101	14.5263
Ca-alpha1D	5.15766	5.76052	7.80698
Ca-alpha1T	1.98054	2.47146	2.69784
Ca-beta	2.70408	3.34468	4.19419
Ca-Ma2d	2.87866	2.91387	3.51048
CaBP1	94.7839	87.5077	95.7522
cac	3.45743	4.54112	4.73567
cact	152.957	154.251	161.005
cactin	11.9313	11.1624	10.3147
cad	0	0.107998	1.83826
Cad74A	0.938412	1.16785	1.40036
Cad86C	11.2854	11.341	11.263
Cad87A	10.6082	10.7206	11.1293
Cad88C	0.507543	0.592208	0.565354
Cad89D	0	0.00769278	0
Cad96Ca	29.7623	31.1858	29.6069
Cad96Cb	0	0	0
Cad99C	15.3466	16.8751	16.1575
CadN	7.28951	8.20153	7.47837
CadN2	0.00937176	0	0.0319759
Cadps	12.0103	16.7626	16.9096
Caf1-105	1.82089	1.46115	2.80953
Caf1-180	2.48518	2.72304	4.57773
Caf1-55	20.0453	18.5662	21.5734
cag	9.29835	9.20504	9.89526
CAH1	805.279	913.771	848.14
CAH13	0	0	0
CAH14	0	0	0
CAH15	0.0359399	0	0
CAH16	0	0	0.0335726
CAH2	257.174	274.331	248.187
CAH3	40.4372	46.2927	42.6992
CAH4	0	0.0339173	0.073032
CAH5	0.224952	0.360373	0.387195
CAH6	0	0	0
CAH7	34.4972	38.0011	37.8226
CAH8	0	0.0203239	0.0434642
CAH9	12.3289	10.4422	16.2441
CAHbeta	9.83807	10.9388	9.71062
cal1	3.20073	3.41015	4.93114
CalpA	80.0004	82.4903	77.8011
CalpB	27.3605	28.3156	28.5891
CalpC	7.18511	8.40447	7.99233
Calr	960.597	783.173	825.835
Cals	48.8263	89.5664	91.2363
Calx	8.60433	9.06914	14.5293
calypso	5.13235	4.0604	5.03367
Cam	415.81	339.9	362.85
CaMKI	68.9695	89.4943	88.6137
CaMKII	42.0204	55.9362	59.4364
Camp	10.1356	10.4769	10.3832
Camta	3.69313	5.48733	5.69976
can	0.0475887	0.0187702	0.0299448
cana	19.8355	21.8148	21.7068
CanA-14F	23.5908	29.2642	32.1949
CanA1	4.08532	3.98995	5.29409
CanB	10.3663	13.6636	12.7494
CanB2	59.2032	54.3811	61.9118
Cand1	20.1331	22.5732	23.2385
CAP	97.7624	96.6295	105.532
Cap-D2	1.05672	1.56885	2.16117
Cap-D3	2.69753	2.80426	2.80518
Cap-G	4.72862	4.86292	5.58324
Cap-H2	6.39663	6.88998	6.58691
Capa	0.064068	0.156458	0.11331
CapaR	0	0	0
Caper	62.8336	71.081	68.094
Capr	25.5112	26.923	29.5529
caps	30.7751	31.3732	33.2387
capt	131.22	136.604	151.477
capu	11.6185	11.8797	11.9228
car	5.39479	6.87632	7.3496
CARPA	0.0581859	0.107152	0.0373455
CARPB	2.95451	3.18293	3.45597
CarT	0.265301	0.246759	0.263257
cas	0	0.029304	0
CASK	20.2926	21.3277	20.8855
casp	27.1577	30.0708	30.3069
cass	64.8091	62.8627	63.6973
Cat	551.081	564.761	562.38
cathD	532.811	521.157	494.645
cato	0	0	0
Catsup	49.4223	51.2354	50.3939
caup	0.4067	0.288702	0.499864
cav	5.06687	4.58658	5.81068
caz	41.6059	41.1396	39.1311
cbc	6.98332	7.55091	7.98804
Cbl	13.1912	14.0886	16.4004
CBP	0.77336	1.09329	3.13398
Cbp20	24.9809	22.6472	26.5891
Cbp53E	5.51534	5.31214	6.30496
Cbp80	20.1991	22.2418	22.5144
cbs	10.8965	9.48269	10.4356
Cbs	17.7881	16.2114	17.3191
cbt	44.0524	40.6173	43.7818
Cby	2.79406	4.50746	4.02776
Cc2d2a	0.582901	0.528882	0.5752
CCAP	0	0	0.05451
CCAP-R	0.0352718	0.00927398	0.00986285
CCDC151	0.0594441	0.0471137	0.0670183
CCDC53	7.57149	7.31846	8.40091
Ccdc58	12.4958	9.30893	9.93965
Ccdc85	3.44792	4.69316	4.67506
CCHa1	2.4855	1.49351	1.27269
CCHa1-R	0.361802	0.402044	0.540438
CCHa2	7.93517	4.7072	7.72971
CCHa2-R	0	0.0201772	0.0107335
Cchl	73.2369	75.1382	77.412
CCKLR-17D1	0.799577	1.07081	1.03746
CCKLR-17D3	0.579358	0.64907	1.09819
Ccm3	71.8139	79.9154	76.7963
Ccn	11.2256	11.6457	11.6433
Ccp84Aa	0	0	0
Ccp84Ab	0	0	0
Ccp84Ac	0	0	0.0322663
Ccp84Ad	0	0	0
Ccp84Ae	0.0574818	0	0
Ccp84Af	0	0	0
Ccp84Ag	0.0359791	0	0.123669
Ccs	31.4083	26.5781	26.4967
CCT1	39.498	36.8508	44.5226
CCT2	37.3085	41.7182	49.1161
CCT3	37.0683	35.227	41.8796
CCT4	39.757	40.7237	46.1944
CCT5	50.868	49.866	55.7447
CCT6	42.45	41.2991	45.6109
CCT7	33.9345	34.285	40.0095
CCT8	48.9705	45.4223	53.9442
CCY	0	0	0
Ccz1	12.8207	13.0034	10.7659
cd	0.0270529	0.0320421	0.0568336
CD98hc	94.7706	93.012	96.8782
Cda4	0.0564277	0.253279	0.238329
Cda5	1.74587	1.67442	2.11959
Cda9	0.117201	0.0467084	0.0500196
CDase	34.0198	33.5641	30.666
cdc14	27.1786	26.1401	26.736
Cdc16	3.90202	4.01189	4.58841
Cdc23	3.3582	3.3372	3.25717
Cdc27	13.9766	12.5545	13.0718
Cdc2rk	7.7013	6.66013	7.37357
Cdc37	45.234	40.4609	42.1262
Cdc42	95.7405	89.336	88.0762
CDC45L	3.74679	4.63089	6.05417
Cdc5	11.6048	10.6723	10.8273
CDC50	56.2799	60.9465	60.32
Cdc6	0.558685	0.746909	1.59026
Cdc7	15.869	12.3358	15.6139
Cdep	28.2556	33.2039	29.6765
CdGAPr	10.5172	11.3367	12.1252
cdi	5.55291	5.53726	6.41048
cDIP	72.857	74.3959	70.5904
Cdk1	0.731549	1.28843	4.52884
Cdk12	17.6141	17.7018	17.412
Cdk2	3.54622	3.89412	6.26821
CDK2AP1	16.0062	18.8647	19.0626
Cdk4	20.7116	25.749	23.0717
Cdk5	11.8854	12.3276	12.9137
Cdk5alpha	10.3616	10.2998	10.7546
Cdk7	6.19251	6.06461	6.86233
Cdk8	2.49457	3.07109	2.1606
Cdk9	10.1318	10.5675	11.0179
Cdlc2	0	0.0613015	0.0669013
cdm	14.5256	14.8612	15.3579
Cds	37.5422	43.1465	43.6325
Cec-Psi1	0	0	0
Cec2	0	0	0
CecA1	2.03393	0.910975	7.16673
CecA2	0	0	0.188594
CecB	0.536919	0.686157	2.05045
CecC	0.953877	0.68917	1.40603
Ced-12	8.21347	7.55821	7.62937
ced-6	184.934	201.851	191.799
Cen	12.9823	13.3658	14.0681
CenB1A	18.0252	19.1837	19.9268
CenG1A	12.4662	13.4188	15.2252
Cenp-C	2.33439	1.94897	3.01373
Cep135	6.01307	6.1844	6.33192
cep290	0.941821	0.84541	0.81321
Cep89	0	0.0201339	0.0215269
Cep97	5.35963	5.39556	6.25889
cer	124.087	110.014	119.978
Cerk	47.6761	48.7836	48.8587
cert	17.9491	19.825	19.6297
cerv	7.52999	9.09502	8.24813
Cf2	20.9539	21.9616	23.0539
Cfp1	5.57983	5.6998	5.98015
cg	29.3826	35.9495	36.3251
CG10000	0	0	0
CG10005	0	0.0379733	0.0649153
CG10011	4.92797	5.85234	5.93368
CG10013	0	0	0.0185118
CG10014	0.0520379	0	0.0442731
CG10019	0.153628	0.142239	0.212728
CG10026	20.2571	19.185	21.096
CG10029	0	0.0218906	0.0234254
CG10031	132.301	125.814	128.801
CG10035	0.333265	2.04058	0.612048
CG10038	13.2901	12.7738	13.0234
CG10041	0.124346	0.133119	0.107443
CG10050	1.52061	2.08931	2.06584
CG10051	0.0892336	0.191161	0.0963367
CG10053	7.46754	6.49486	7.30808
CG10055	8.01969	8.94148	9.44594
CG10062	1.52219	1.06136	1.22762
CG10063	0	0.0411819	0.0444927
CG10064	0	0.0118568	0
CG10068	15.4125	15.5317	15.9997
CG10073	0.115578	0.253521	0.237349
CG10075	26.4303	26.3946	28.8612
CG10077	180.539	209.195	222.781
CG10081	0	0	0
CG10082	31.5719	33.8468	34.731
CG10086	0	0.0310506	0
CG10089	5.98933	6.3175	5.99507
CG10096	0.198624	0.02617	0.0670438
CG10097	0.0209603	0.0902027	0.103038
CG10098	18.4237	18.8311	20.4997
CG10103	54.3996	54.4895	54.4752
CG10104	0	0	0
CG10116	0.13412	0.215797	0.155028
CG10126	142.325	152.645	163.223
CG10132	4.22324	4.02628	4.20605
CG10137	6.73458	7.20416	7.53179
CG10139	16.4707	13.2016	15.6452
CG10140	0	0	0
CG10147	5.29835	6.80548	6.22413
CG10151	1.24343	1.09667	1.10602
CG10154	0	0	0
CG10163	0	0.0506454	0.162865
CG10164	0	0	0
CG10165	37.8055	36.6606	34.5506
CG10166	55.9329	49.6092	52.4384
CG10171	3.86138	6.86958	6.44171
CG10175	619.231	702.54	593.847
CG10177	0	0	0.0223171
CG10182	0	0.0128407	0
CG10183	0	0	0
CG10184	4.76235	4.36602	4.52754
CG10185	0.939139	1.01282	0.921323
CG10188	6.186	6.71838	7.58239
CG10189	7.80555	7.74677	8.96353
CG10194	11.6669	12.0112	12.985
CG10195	12.0188	12.8869	12.8453
CG10205	828.151	895.402	827.393
CG10208	6.12086	6.12789	5.23471
CG10209	9.35709	8.85239	8.30465
CG10211	204.284	196.248	202.55
CG10214	13.1555	12.9796	12.5621
CG10222	6.34762	6.73873	6.98369
CG10226	4.12906	4.44543	4.41218
CG10232	0.117547	0.108677	0.215304
CG10237	2892.92	3291.24	3145.64
CG1024	5.51323	4.57143	4.61491
CG10252	0.303161	0	0
CG10254	12.6786	14.8057	17.4926
CG10257	6.78034	5.96941	5.91841
CG10264	0	0.0304918	0
CG10265	2.61561	2.1988	2.21407
CG10268	6.21992	5.88971	5.85489
CG10274	7.43276	7.16591	7.28101
CG10280	0	0.0592915	0
CG10283	6.4274	6.70177	6.41743
CG10286	9.00522	8.05118	7.95824
CG10298	0	0	0.0513391
CG10300	0	0	0
CG10301	0	0	0
CG10307	11.5628	12.1261	15.4884
CG10311	52.2502	56.028	66.2707
CG10317	0	0	0
CG10321	18.2489	19.1177	19.4595
CG10324	3.94442	4.04105	4.07238
CG10333	15.6827	14.9276	13.232
CG10336	0.31846	0.533869	1.55338
CG10337	5.52333	8.28822	9.6079
CG10338	6.03292	8.76811	8.73621
CG10339	26.6633	24.2813	23.7038
CG10340	44.7457	45.9097	47.6391
CG10341	17.4603	16.0293	16.3239
CG10343	11.5951	13.4128	12.7925
CG10344	9.84464	7.64427	8.02936
CG10345	598.752	563.711	571.66
CG10347	8.53225	9.90453	10.4825
CG10348	7.08868	6.36663	6.17523
CG10352	2.01324	2.4011	2.63125
CG10353	22.6057	22.9176	25.2354
CG10357	0.248066	0.0567017	0.0608712
CG10359	2.34714	2.31524	2.29811
CG10361	2.00431	1.51085	1.79562
CG10362	1.96329	2.42776	2.065
CG10365	15.8775	14.7213	18.2091
CG10366	6.81914	6.92355	7.49813
CG10375	28.7973	24.754	25.7041
CG10376	11.6464	14.7267	15.0431
CG10383	17.3291	17.844	18.3733
CG10384	0	0	0
CG10395	5.33895	7.25973	8.60747
CG10405	0.39645	0.425087	0.305299
CG10407	1.20232	2.09152	3.2036
CG10413	21.4718	24.5042	26.3172
CG10417	21.165	25.314	26.6468
CG10418	20.2329	15.9697	16.6315
CG10425	17.711	18.2021	18.4858
CG10428	4.81322	4.8036	5.69936
CG10431	0.900709	1.24506	1.03534
CG10433	112.117	116.854	127.582
CG10435	17.3999	16.9784	16.2802
CG10444	20.1611	22.6048	23.0933
CG10445	1.54082	1.69781	1.75685
CG10459	0.0655264	0.0523378	0.0561259
CG10462	15.7458	14.8245	13.8703
CG10463	4.71848	3.64774	3.65016
CG10465	28.5146	44.1655	43.7141
CG10466	5.98915	4.19823	6.79746
CG10467	23.8973	22.3726	21.7118
CG10469	3.16166	3.4555	3.00819
CG10470	42.6845	31.9477	32.6244
CG10472	0.916484	0.736831	1.1338
CG10474	0	0	0
CG10477	0	0	0
CG10479	1.30114	1.76994	1.60873
CG10481	0	0.0142891	0.0152339
CG10483	2.17975	1.8141	2.37278
CG10486	0.0625978	0.0618639	0.10543
CG10492	9.11443	10.3157	11.7871
CG10494	3.48932	2.79886	3.06795
CG10495	5.23553	5.07351	4.62704
CG10505	0.0543885	0.0305713	0.0194774
CG10508	42.5582	39.4059	38.8106
CG10510	0.0212575	0.0337251	0.0720009
CG10512	17.8945	20.351	20.8627
CG10513	1.98849	1.85142	2.05326
CG10514	1.76444	1.36068	1.48026
CG10516	5.48435	5.07914	5.95231
CG10527	533.033	613.208	625.619
CG10543	12.9171	14.8525	15.2692
CG10550	665.219	607.201	635.972
CG10553	48.7037	64.0378	53.6316
CG10555	7.50712	8.25954	8.73818
CG10559	11.304	9.68415	10.5148
CG10560	15.3148	18.3936	16.2981
CG10561	12.266	14.4659	13.68
CG10562	41.8828	50.068	47.439
CG10565	36.4875	33.1917	35.2638
CG10570	3.21537	3.06905	3.51574
CG10576	90.0583	80.7295	86.112
CG10581	4.78275	5.06812	5.39997
CG10584	13.2191	12.4592	12.3427
CG10587	0	0	0
CG10588	0	0	0.0180884
CG10589	0	0	0
CG10591	0	0	0
CG10597	0	0	0
CG10598	0	0	0
CG10600	22.0002	23.6605	21.6544
CG10602	43.0677	42.6079	44.9964
CG10616	16.9455	17.9147	20.2373
CG10621	4.29311	4.054	4.00199
CG10623	30.8138	30.0789	30.6559
CG10628	9.98373	9.94953	10.8184
CG10631	5.36817	5.68227	5.80637
CG10638	33.7522	32.3394	32.9261
CG10646	7.19377	8.01042	8.0791
CG10650	7.56908	8.83789	8.11484
CG10651	0	0	0
CG10654	1.64392	1.20836	1.22962
CG10657	694.695	745.463	644.831
CG10660	10.2599	8.4626	9.19962
CG10663	0.655688	0.498158	0.550221
CG10669	3.84967	3.41342	3.86487
CG10672	119.462	127.496	126.241
CG10674	57.9566	57.9588	58.2939
CG10680	159.869	143.4	156.961
CG10681	5.28359	5.67416	6.81518
CG10694	0	0	0
CG10700	0	0.0166346	0
CG10702	1.54619	1.31172	1.4228
CG10710	2.57805	3.21235	3.02367
CG10713	0.322342	0.498131	0.553793
CG10725	0	0	0
CG10730	0.0543814	0.129174	0.0918124
CG10731	12.0157	10.8544	10.9287
CG10734	0	0.0620452	0.0442373
CG10737	198.389	203.666	209.453
CG10738	0.309951	0.196022	0.345965
CG1074	11.5372	12.074	11.7232
CG10747	47.8125	47.4464	49.5898
CG10748	0	0	0
CG10749	0	0	0
CG10750	0	0	0
CG10752	0	0	0
CG10761	0	0	0.0262836
CG10764	0.238755	0.0861109	0.0919368
CG1077	0	0.12291	0.602179
CG10778	15.6306	17.1697	16.1347
CG10793	0	0.017706	0
CG10795	17.644	15.4965	17.2243
CG10799	7.68774	6.97868	8.64151
CG10801	0.0627217	0.0352644	0.0753186
CG10802	16.8279	16.4656	18.0979
CG10803	7.16212	8.57899	9.5261
CG10804	2.48302	2.61033	2.7453
CG10809	6.51726	6.04506	6.41875
CG10814	1.11006	0.390143	1.47124
CG10822	0	0	0
CG10834	0	0	0.118276
CG10839	0	0	0
CG10841	0.0889849	0.140637	0.162225
CG10845	0	0	0
CG10853	0	0	0
CG10859	0.164135	0.0433214	0.0461891
CG10862	0	0	0.0276657
CG10863	163.004	138.026	146.761
CG10864	0.577117	0.515882	0.816734
CG10866	12.1205	14.9954	14.5451
CG10869	0.145052	0.127457	0.149359
CG10874	14.0659	14.4288	15.463
CG10877	14.7781	13.6826	11.8829
CG10880	4.44874	4.8565	4.74412
CG10887	0	0	0
CG10889	2.89252	3.28172	3.84488
CG10898	8.09571	7.97382	7.59917
CG1090	5.27501	6.76488	6.72365
CG10903	9.43648	10.8454	11.0706
CG10904	14.611	12.1514	13.4234
CG10907	4.03745	3.26115	3.69895
CG10909	0	0.106181	0.0284718
CG10910	0.0364344	0.0432742	0.0153795
CG10911	0.253544	1.08781	0.298289
CG10912	0	0.581939	0.0784026
CG10914	4.10191	3.83204	4.15896
CG10915	13.8318	15.2082	15.2691
CG10916	15.726	16.5758	15.7446
CG10918	0	0	0
CG10919	0.0554527	0.0449029	0.0486029
CG1092	3.73717	2.79245	3.86244
CG10920	0	0	0
CG10927	1.17114	0.614962	1.17591
CG10931	0.355105	0.309328	0.276377
CG10932	32.9924	38.938	38.0352
CG10934	0.191153	0.0306363	0.0329264
CG10936	6.80503	6.4137	7.2675
CG10939	325.988	341.147	325.925
CG10943	0	0	0
CG10947	9.95323	11.1334	16.4235
CG10948	10.3566	10.2587	10.7309
CG10949	6.16625	6.54004	6.86583
CG10950	0.114819	0.0758049	0.113192
CG10953	0	0.0333651	0
CG10958	2.66248	2.26839	2.45805
CG10959	1.5141	1.59489	1.44888
CG10960	18.8751	24.8925	26.8272
CG10962	5.425	2.86638	4.36445
CG10969	0	0	0
CG10970	0.273251	0.372923	0.221237
CG10973	14.599	16.2035	18.853
CG10979	11.3306	13.6682	12.5431
CG10984	21.2301	17.7288	18.0136
CG10993	0	0.0501292	0
CG10996	0.246672	0.0983981	0.0527191
CG11000	1.33078	1.22535	1.33014
CG11007	8.17527	8.25648	8.7423
CG11018	0	0	0
CG11029	0.284235	0.482875	0.618311
CG1103	8.15277	9.71754	10.9112
CG11030	13.135	10.5593	11.3028
CG11034	4.99406	5.95282	6.041
CG11035	18.7178	14.3544	16.3597
CG11037	0	0	0
CG11041	0	0.153115	0.505148
CG11044	3.52782	3.36794	4.54754
CG1105	41.5253	41.729	45.0823
CG11050	82.0674	83.9087	101.444
CG11052	0.0776292	0	0.0696285
CG11060	0.0618971	0.0489314	0.026057
CG11068	0	0.0241399	0.155167
CG11069	21.4142	28.4071	23.4343
CG11070	21.6376	22.7205	22.669
CG11073	351.541	377.544	364.26
CG11076	42.9399	45.9261	47.2746
CG11077	44.9696	41.2935	46.433
CG11085	0	0	0
CG11089	6.7134	6.44919	7.16083
CG11095	7.7135	8.8336	9.45163
CG11099	3.43949	2.7555	3.06576
CG11103	14.5651	19.3232	19.858
CG11106	0	0.165869	0
CG11109	17.2707	16.206	15.7772
CG11110	8.82547	7.71741	7.09428
CG11112	0	0	0
CG11113	0	0	0
CG11122	4.99626	5.315	5.81533
CG11123	7.35593	6.41175	6.07363
CG11125	5.84222	5.83048	6.12938
CG11127	16.1671	17.5833	18.1759
CG1113	0.448865	0.598528	0.517859
CG11131	0	0	0
CG11134	16.6112	15.0298	16.7193
CG11137	141.441	127.017	133.264
CG11141	13.2998	13.8241	13.507
CG11145	0	0	0
CG11147	180.255	196.569	187.639
CG11149	0	0.0294852	0
CG11151	647.761	662.612	674.592
CG11155	13.8022	24.7347	24.1998
CG11158	13.0766	12.0907	11.4067
CG11159	0.138635	0.113216	0.0616322
CG1116	23.8692	23.5424	23.1347
CG11162	0	0	0
CG11164	1.21838	1.63831	2.33286
CG11168	13.1861	12.7797	13.3138
CG11170	3.63418	3.76294	4.34602
CG11178	5.30066	5.3347	6.22374
CG11180	7.75373	6.64437	7.73867
CG11191	19.3535	18.9028	18.71
CG11192	0	0	0
CG11200	58.5156	51.9441	50.9309
CG11211	4197.1	3970.63	4017.46
CG11226	0.285961	0.200213	0.307089
CG11227	0	0	0
CG11236	4.08699	3.21212	4.60259
CG1124	1716.75	1597.34	1641.09
CG11241	10.8961	13.1861	12.8089
CG11247	10.5445	11.0138	12.0536
CG11248	5.17351	5.54654	6.07006
CG11249	0.0341879	0	0.0288303
CG11251	0	0	0
CG11257	5.04098	5.05435	5.25043
CG11262	0	0	0
CG11263	0.0788296	0.126438	0.481159
CG11267	70.848	54.4985	62.0365
CG11269	0	0	0
CG11275	67.4507	75.1346	68.0808
CG11279	26.7432	22.964	21.4056
CG11286	0	0	0
CG1129	24.375	25.2067	27.0755
CG11291	0	0.0239165	0.025619
CG11294	0	0.0236755	0
CG11298	0	0	0
CG11300	0	0	0
CG11307	5.82126	5.66995	6.42087
CG11309	79.3009	75.2416	80.4765
CG11313	0	0	0
CG11317	3.56881	2.73343	2.95424
CG11318	0.0127674	0.0302304	0
CG11319	1.12829	1.58845	1.60142
CG11322	0	0.0990426	0.123324
CG11327	0	0.0321317	0.017143
CG11333	0	0	0
CG11334	21.258	19.7378	22.4308
CG11342	1.80728	3.30828	3.59742
CG11345	0	0	0
CG11349	0	0.0145958	0
CG11350	0.100203	0.0995832	0.0851695
CG11353	0.169182	0.104873	0.212953
CG11356	0	0.268485	0.339016
CG11357	6.3909	9.05798	9.14832
CG1136	11.058	11.7834	12.4392
CG11360	3.88294	5.64155	6.06804
CG11362	0.0564008	0.045697	0
CG11367	8.79911	9.85763	9.41373
CG11368	26260.7	29705.6	31336.8
CG11369	0	0	0
CG1137	0	0.0222104	0
CG11370	0	0.0232941	0.0249432
CG11373	0	0	0
CG11374	0.743562	0.920965	1.52526
CG11377	36.4721	36.479	39.3411
CG11378	41.1862	39.8189	40.1432
CG11379	0.0547166	0	0
CG1138	0	0	0
CG11380	0.0784221	0.0412701	0
CG11381	0.0231847	0.718085	2.73409
CG11382	0	0.0167297	0.214309
CG11384	0	0.013188	0.0281047
CG1139	0.920372	1.31225	1.00148
CG11391	1.62921	2.59953	2.37766
CG11396	20.3151	19.3791	18.3585
CG11398	4.72061	3.55286	4.01308
CG11399	9.40158	10.6058	12.6981
CG11400	37.0962	29.9588	30.3902
CG11403	2.09389	1.94019	2.46216
CG11404	0	0	0
CG11406	0	0	0
CG11407	686.302	639.454	590.979
CG11409	2.43727	1.90165	1.87286
CG11413	0.625474	0.256806	0.491165
CG11414	25.2866	24.2024	26.2191
CG11417	7.85708	7.39647	8.16655
CG1142	18.3247	13.8016	14.836
CG11425	51.1838	51.7806	54.7589
CG11426	19.791	22.3323	21.8062
CG1143	56.608	55.5147	49.9102
CG11436	4.37826	4.41607	4.27885
CG11437	1.54402	2.44559	1.8943
CG11438	61.928	74.3993	70.456
CG11444	67.9265	67.1622	68.6404
CG11447	14.3608	15.2471	15.3846
CG11449	0	0	0
CG11453	2.47786	2.58181	3.1602
CG11454	27.7601	22.7466	24.0853
CG11456	7.04448	7.01905	7.43076
CG11458	0.646789	0	0.336766
CG11459	1.22454	1.14765	1.71258
CG1146	28.5502	27.5447	35.2036
CG11470	0	0	0
CG11474	21.7399	18.5343	17.3216
CG11475	0.214853	0.303464	0.263472
CG11486	49.7051	53.9343	58.2575
CG11498	3.61227	2.61286	3.71171
CG11504	9.50703	10.0465	10.7081
CG11523	11.3624	11.9151	14.26
CG11529	1.8675	1.41565	1.91635
CG11534	12.2955	12.9973	14.0546
CG11537	17.1708	21.4412	21.405
CG11539	7.04899	8.33956	8.09131
CG11550	1230.22	1385.88	1254.8
CG11555	12.9544	14.1118	13.7341
CG11560	10.3528	8.38015	8.32615
CG11562	10.6884	11.0245	10.2103
CG11563	14.5964	14.0359	14.1457
CG11566	0	0	0.015259
CG11570	0	0	0
CG11581	0	0	0
CG11583	13.3138	12.0194	12.3007
CG11584	0.0654263	0	0.0137833
CG11585	0.803881	0.72266	0.832615
CG11586	16.4719	13.1919	16.5409
CG11588	0	0	0
CG11590	23.5762	22.6997	23.085
CG11593	12.1141	12.5169	13.4605
CG11594	10.3405	10.6928	11.0411
CG11596	12.0475	10.6352	13.499
CG11597	2.62325	3.56841	3.7364
CG11598	0.308918	0	0.105642
CG11600	0	0	0
CG11601	46.5319	54.4302	49.8297
CG11608	0	0	0
CG1161	77.6725	76.7417	72.8512
CG11617	3.58952	3.41241	5.02551
CG11619	0.265225	0.256149	0.285127
CG11626	0.100892	0.159962	0.0512045
CG11629	0	0	0
CG11630	0.0358602	0.0709747	0.0151328
CG11634	0	0	0
CG11635	1.5732	0.632428	0.643375
CG11638	2.32759	2.19162	2.05366
CG11655	37.8547	44.1717	43.2722
CG11656	0.035362	0.0282888	0.030368
CG11658	28.0523	34.7553	32.6181
CG11659	0	0	0
CG11663	0	0	0
CG11664	0	0	0
CG11666	0	0	0
CG11668	24.7512	26.5949	24.1123
CG11670	0	0	0
CG11672	0	0.0335809	0
CG11674	0	0.372016	3.10666
CG11679	11.2976	11.0941	10.7035
CG11686	128.498	149.382	167.556
CG11693	0.314959	0.104411	0.223353
CG11694	0.0436999	0	0
CG11695	7.22933	6.8528	6.90802
CG11696	6.34137	7.26189	7.97941
CG11698	0	0	0
CG11699	66.3531	69.1759	72.1462
CG11700	0.111649	0.288984	0.309298
CG11703	0	0	0
CG11710	12.7507	14.538	14.2124
CG11714	0.0229969	0.0182611	0
CG1172	11.9969	15.3869	15.3561
CG11722	13.757	12.0036	11.2298
CG11723	8.31813	9.2225	7.88784
CG11726	0.0820727	0	0
CG11737	60.2933	64.111	62.4086
CG11741	8.13403	5.20809	5.64139
CG11752	85.45	110.47	111.04
CG11753	36.6823	37.9229	39.6738
CG11755	6.39389	4.45442	4.72588
CG11756	0	0.0945714	0
CG11760	1.15205	1.9073	1.94446
CG11768	7.80642	7.9951	7.4242
CG11771	21.9569	23.9964	23.4644
CG11777	13.236	10.6149	10.7442
CG11779	16.5818	15.5086	15.9901
CG11781	50.9984	49.8755	52.8284
CG11786	0.168339	0.181823	0.0492149
CG11788	2.58865	1.89164	2.31566
CG11790	114.135	107.226	105.001
CG11791	93.9199	112.681	117.647
CG11807	26.8709	29.1363	29.3547
CG11808	9.56353	5.97172	6.41108
CG11811	23.7683	20.3466	22.322
CG11815	0.0397507	0	0.0342882
CG11816	0	0	0
CG11825	2.99751	6.55636	3.71122
CG11828	0	0	0
CG11835	3.30379	2.78908	4.17486
CG11836	6.88723	7.72506	8.52736
CG11837	5.86221	5.92058	5.37406
CG11839	4.87868	4.42536	4.47279
CG11841	46.5067	50.6516	50.1632
CG11842	5.97949	4.97985	5.28507
CG11843	1.7861	1.73534	1.04734
CG11852	84.2179	96.6736	88.9178
CG11854	25.4649	29.3971	27.792
CG11857	71.9057	78.8891	80.9272
CG11858	24.4378	19.0102	18.7874
CG11865	0	0	0
CG11873	8.88864	10.6466	10.0537
CG11878	0	0.0225594	0
CG11882	5.60191	4.83393	5.16078
CG11883	7.86659	7.21572	7.9734
CG11885	8.59836	9.71247	12.5682
CG11889	0.980594	0.407102	0.414286
CG11891	0.714738	0.71932	0.396128
CG11892	0.124025	0	0.0632331
CG11893	0	0.255123	0.227438
CG11898	1.5373	1.53026	1.27162
CG11899	140.218	125.332	140.951
CG11902	4.73851	4.2566	4.53181
CG11905	0.0698578	0.0953024	0.0691765
CG11906	5.06834	4.95937	5.08469
CG11911	0	0.234772	0.397077
CG11912	0	0.036996	0
CG11920	8.16897	8.26936	10.7054
CG11927	11.0397	11.3674	11.5589
CG11929	0	0	0
CG11951	36.1268	36.2084	32.7358
CG11961	39.988	37.301	36.2136
CG11964	15.3057	13.2161	14.6859
CG11970	6.71554	7.21423	6.9439
CG11975	22.5638	22.224	24.2877
CG11977	0	0	0.042423
CG11980	46.6799	37.3547	36.9039
CG11983	0.422398	0.335263	0.395288
CG11986	7.04366	6.0561	5.44618
CG11997	0	0	0.0208383
CG11999	56.2349	53.4808	58.9955
CG12003	0.0202775	0	0
CG12004	41.746	48.9727	50.4702
CG12007	15.2238	15.1285	15.6725
CG12009	0	0	0
CG12010	3.29117	3.04244	3.16052
CG12011	0.0213676	0.0339021	0.036191
CG12012	47.6921	51.5825	53.8877
CG12016	3.16809e-06	1.52044e-33	1.55215e-59
CG12017	0	0.0114851	0.0244664
CG12018	3.96343	4.48288	5.26261
CG12020	0	0	0
CG12024	17.6002	17.0701	18.3915
CG12025	34.5028	37.4602	42.3546
CG12035	0	0	0.0261579
CG12038	1.49964	1.76872	1.64956
CG12054	22.9471	19.9663	18.9921
CG12056	35.4294	35.028	37.3088
CG12057	0	0	0.558431
CG12061	0	0	0
CG12065	40.8524	43.7551	42.8962
CG12069	0	0	0
CG12071	1.97141	2.27659	2.49032
CG12075	157.083	185.948	150.258
CG12078	0	0	0
CG1208	1.44565	1.08991	2.1107
CG12081	10.607	11.8533	11.0736
CG12084	15.5534	17.511	17.5722
CG12091	73.5104	70.3614	77.197
CG12093	51.0553	53.7811	51.2137
CG12096	19.8951	20.176	21.8308
CG12099	77.0466	79.93	85.0226
CG12104	15.6631	15.0453	17.1553
CG12105	0.208744	0.142951	0.364487
CG12106	5.23114	5.11327	5.8024
CG12107	59.6309	57.7611	58.9513
CG12111	0.146308	0.29943	0.195925
CG12112	12.928	12.2328	14.875
CG12115	0.191546	0.154394	0.083296
CG12116	34.2498	41.8598	45.3122
CG12118	25.1487	25.68	26.2441
CG12121	39.8412	40.5102	41.9274
CG12123	9.31746	7.89482	9.57007
CG12126	0	0	0
CG12128	11.0289	10.1476	10.5176
CG12129	14.1752	11.5847	13.6407
CG1213	2666.07	3342.11	2898.58
CG12133	0	0	0
[truncated: 14,978 more rows]
