# Supplementary material for: Evolutionary shifts in taste coding in the fruit pest Drosophila suzukii
Source: eLife. 2021 Feb 22;10:e64317. doi: 10.7554/eLife.64317 (PMC7899650; doi:10.7554/eLife.64317)
Supplement: Supplementary file 2. [file elife-64317-supp2.xlsx]

## Sheet: TPM
tracking_id	Dmel_Lab_rep1	Dmel_Lab_rep2	Dmel_Lab_rep3	Dsuz_Lab_rep1	Dsuz_Lab_rep2	Dsuz_Lab_rep3	Dbia_Lab_rep1	Dbia_Lab_rep2	Dbia_Lab_rep3	average Dmel	average Dsuz	average Dbia
140up	450.83	406.13	461.047	267.442	242.894	273.902	311.622	264.368	260.536	439.336	261.413	278.842
26-29-p	3373.41	4296.9	4485.73	9256.57	10833.5	12334.8	5958.11	4748.63	5170.01	4052.01	10808.3	5292.25
7B2	852.399	1199.26	1188.19	432.331	433.584	518.797	230.189	191.195	182.39	1079.95	461.571	201.258
AANATL2	32.4074	35.4938	54.0123	4.60829	10.7527	6.14439	13.7615	7.64526	4.58716	40.6378	7.16846	8.66464
ACC	2257.86	3050.09	2806.88	1348.93	1780.4	1984	939.235	774.245	682.227	2704.94	1704.44	798.569
AGBE	1012.17	1332.36	1374.7	820.175	1173	1495.61	1150.85	910.462	1018.49	1239.74	1162.93	1026.6
ALiX	2034.29	2775.92	2506.38	2586.33	2812.55	3381.69	1502.39	1356.46	1456.94	2438.86	2926.86	1438.6
AP-1-2beta	1486.79	1960.55	1830.98	1260.79	1550.6	1808.12	740.861	684.763	690.554	1759.44	1539.84	705.393
AP-1gamma	835.383	1191.6	1144.13	1299.38	1594.59	1807.69	775.967	683.978	636.796	1057.04	1567.22	698.914
AP-1mu	1403.76	1636.93	1635.37	40.3587	7.47384	8.96861	985.915	841.158	906.886	1558.69	18.9337	911.32
AP-2alpha	681.206	879.433	859.574	756.479	930.422	1028.75	723.759	652.482	622.695	806.738	905.217	666.312
AP-2mu	1122.81	1498.86	1405.03	1133.03	1303.52	1473.24	897.025	810.831	878.719	1342.23	1303.26	862.192
AP-2sigma	1436.62	1514.08	1467.14	1112.68	1251.17	1342.72	2457.75	1978.87	2049.3	1472.61	1235.52	2161.97
APC4	122.151	180.645	187.097	99.6119	117.292	131.091	71.4901	65.4608	63.7382	163.298	115.998	66.8964
APP-BP1	263.995	276.718	305.98	163.188	189.121	220.746	271.628	191.476	232.188	282.231	191.018	231.764
AQP	202.899	321.256	433.575	127.044	235.22	286.792	37.594	36.3409	13.7845	319.243	216.352	29.2398
ATP7	866.826	1161.08	1107.66	224.775	305.6	349.709	316.456	265.295	231.276	1045.19	293.361	271.009
ATPCL	2686.15	3057.25	3031.47	3751.37	4274.53	5170.93	2208.63	1860.91	1829.74	2924.96	4398.94	1966.43
ATPsyn-Cf6	12666.7	12874.2	11424.5	7200	9533.33	11631.7	8201.26	5528.3	5638.36	12321.8	9455.01	6455.97
ATPsyn-beta	29729.4	38778.2	38528.7	31896.8	40906.3	48085.5	35136.6	29217.2	31682.5	35678.8	40296.2	32012.1
ATPsyn-d	12161	15093.6	14322.1	8574.39	10730.7	12382.3	9445.69	6565.54	7146.07	13858.9	10562.5	7719.1
ATbp	90.2062	94.5017	88.488	71.753	83.5604	118.074	46.7461	54.0788	44.9129	91.0653	91.1291	48.5793
Aatf	275.273	274.59	316.94	127.31	132.101	171.8	458.073	365.211	370.062	288.934	143.737	397.782
Aats-ala	963.078	1142.86	1114.56	789.983	1017.62	1261.14	551.07	453.071	460.317	1073.5	1022.91	488.153
Aats-ala-m	311.594	394.598	385.375	174.085	231.124	265.084	276.68	226.285	262.516	363.856	223.431	255.16
Aats-arg	494.236	644.11	569.925	558.245	623.298	689.864	735.146	648.036	687.815	569.424	623.802	690.332
Aats-asn	1199.52	1560.93	1418.76	874.327	1044.28	1327.35	704.301	593.787	593.19	1393.07	1081.99	630.426
Aats-asp	1193.35	1452.61	1458.25	1158.16	1618.78	1831.13	620.213	561.205	621.469	1368.07	1536.02	600.962
Aats-gln	765.638	856.47	850.471	397.683	464.178	506.221	285.347	251.071	285.775	824.193	456.027	274.064
Aats-gly	816.888	1023.56	1010.8	434.953	671.576	725.086	695.098	597.059	647.549	950.416	610.538	646.569
Aats-his	1007.02	1369.09	1381.86	1385.9	1750	2005.13	616.763	532.31	541.907	1252.66	1713.68	563.66
Aats-leu	277.33	323.36	299.962	100.998	114.055	130.184	163.406	134.254	169.927	300.217	115.079	155.862
Aats-lys	754.355	876.887	926.249	864.24	1192.95	1283.07	565.343	480.138	501.439	852.497	1113.42	515.64
Aats-pro	141.194	183.406	160.116	44.107	44.107	72.3066	139.971	103.175	115.44	161.572	53.5069	119.529
Aats-tyr	826.667	1203.81	1168.89	678.753	770.356	957.379	656.508	528.889	548.571	1066.46	802.163	577.989
Aats-tyr-m	270.115	352.73	350.575	81.3535	105.112	88.5529	247.126	191.092	183.19	324.473	91.6728	207.136
Aats-val	731.808	918.017	910.709	951.018	1298.03	1548.35	705.116	566.571	692.088	853.511	1265.8	654.592
Ac13E	1166.07	1701.18	1545.36	543.86	635.916	724.029	367.136	309.301	284.486	1470.87	634.602	320.308
Ac3	55.1271	89.1174	79.1203	26.3605	27.7778	42.517	27.234	26.6667	29.2199	74.4549	32.2184	27.7069
Acam	0	0	0	0	0	2.26757	0	0	0	0	0.755857	0
Ace	1406.27	2001.03	1785.31	694.357	917.45	1101.36	152.756	129.134	102.362	1730.87	904.389	128.084
Acer	319.577	419.577	401.058	780.604	1058.29	1257.02	2508.47	2157.67	2286.24	380.071	1031.97	2317.46
Ack	798.695	988.506	924.821	405.119	525.905	574.594	271.34	247.975	228.972	904.007	501.873	249.429
Acn	1309.88	1396.03	1434.82	729.61	819.592	913.564	743.624	555.705	593.289	1380.24	820.922	630.873
Acp26Ab	0	0	0	0	7.24638	7.24638	0	0	0	0	4.83092	0
Acp32CD	0	0	0	0	0	0	0	0	0	0	0	0
Acp53C14b	0	0	0	0	0	0	0	0	0	0	0	0
Acsl	4586.48	5701.63	5171.1	6486.62	7654.42	8390.02	5042.89	4017.25	3761.77	5153.07	7510.35	4273.97
Act42A	601.064	690.603	770.39	1844.44	2199.11	2504	1649.82	1408.69	1500.89	687.352	2182.52	1519.8
Act57B	11813.8	14295.2	23359	7734.22	10882.7	12696	977.837	900.709	610.816	16489.3	10437.6	829.787
Act5C	20850.2	30287.2	24898.9	19331.6	24827.6	29936.9	12548.8	9445.92	10293.4	25345.4	24698.7	10762.7
Act79B	46.0993	54.078	105.496	2.66667	51.5556	11.5556	0	0	0	68.5578	21.926	0
Act87E	1079.79	1070.04	1791.67	573.333	815.111	1052.44	48.7589	51.4184	26.5957	1313.83	813.628	42.2577
Act88F	3.5461	3.5461	4.43262	0.925069	3.70028	13.876	54.9645	39.8936	59.3972	3.84161	6.16712	51.4184
Actn	2004.47	2544.13	3307.26	1098.62	1589.88	1902.11	319.553	262.942	233.147	2618.62	1530.2	271.881
AdSL	379.071	526.681	541.234	422.222	644.444	665.278	161.469	158.697	160.083	482.329	577.315	160.083
AdSS	7493.66	11762.9	10299.8	6361.18	9736.27	10634.2	6737.83	5695.13	5931.09	9852.12	8910.55	6121.35
Ada	88.0317	77.1513	99.9011	27.9441	20.9581	33.9321	70.6468	59.7015	58.7065	88.3614	27.6114	63.0183
Ada2a	146.252	207.191	183.425	17.1756	19.7201	21.6285	22.2222	23.4568	23.4568	178.956	19.5081	23.0453
Adam	2882.77	3149.72	3118.64	2279.43	2137.59	2503.55	1776.84	1388.42	1309.32	3050.38	2306.86	1491.53
AdenoK	952.657	1354.59	1311.11	656.977	1077.52	1131.78	786.473	604.831	629.952	1206.12	955.426	673.752
Adgf-A	11516.6	17060.9	13034.4	10474.6	13360.3	15385.7	12949.1	11317.6	11809.7	13870.6	13073.5	12025.5
Adgf-D	142.762	154.714	164.011	64.2077	74.4536	105.191	60.241	46.1847	52.8782	153.829	81.2841	53.1013
Adgf-E	0	0	0	0	0	0.619579	0	0	0	0	0.206526	0
Adh	11109.4	13553.4	18256.5	5371.24	6743.79	9916.34	7190.1	5225.26	5325.52	14306.4	7343.79	5913.63
Adhr	33.0882	37.9902	29.4118	2.36967	1.18483	0	4.90196	4.90196	2.45098	33.4967	1.18483	4.08497
Adk3	537.037	660.494	662.037	486.822	426.357	463.566	305.556	209.877	202.16	619.856	458.915	239.198
Ady43A	260.474	462.659	420.765	480.874	554.645	700.364	293.37	247.048	264.305	381.299	578.628	268.241
Afti	223.51	342.029	347.182	258.47	289.771	332.688	193.881	151.369	161.031	304.24	293.643	168.76
Ahcy13	1084.88	1502.31	1567.13	430.233	824.806	796.124	368.827	310.185	334.877	1384.77	683.721	337.963
Ak6	272.381	314.286	300.952	365.9	283.525	277.778	405.714	369.524	377.143	295.873	309.068	384.127
Akh	4.21941	4.21941	4.21941	4.2735	0	0	25.3165	8.43882	4.21941	4.21941	1.4245	12.6582
AkhR	331.828	583.898	503.386	75.0552	99.3377	114.79	124.909	120.552	162.672	473.037	96.3943	136.044
Ald	24377.7	32135.7	34351.8	24118.5	36133.3	48700	5094.18	4376.73	3855.96	30288.4	36317.3	4442.29
Aldh	12762.2	16034.6	16327.6	2344.25	2996.15	3364.8	1694.23	1402.56	1494.23	15041.5	2901.73	1530.34
Alg10	306.607	353.378	369.71	174.851	258.929	278.274	270.23	201.93	250.186	343.232	237.351	240.782
Alk	50.1666	59.1809	85.4399	38.1455	24.061	45.7746	7.6157	4.10076	2.92912	64.9291	35.9937	4.88186
AlkB	174.699	276.104	284.137	105.105	155.155	158.158	255.255	210.21	175.175	244.98	139.473	213.547
Als2	565.052	809.107	689.771	572.546	748.715	897.384	473.531	416.106	473.531	687.977	739.548	454.389
Amph	5362.13	6435.77	5954.04	4011.45	4868.84	5934.14	6045.38	4703.64	4763.59	5917.31	4938.14	5170.87
Amun	2050.91	2815.15	2705.45	1320.24	1542.26	1944.64	741.4	632.859	604.389	2523.84	1602.38	659.549
Amy-p	65.4521	91.0931	94.4669	219.743	200.811	304.26	3.37382	0.674764	3.37382	83.6707	241.605	2.47413
Amyrel	1.35227	6.08519	3.38066	0	0	1.35501	0	0	0	3.60604	0.45167	0
Andorra	0	0	0	0	0	1.34953	0	0	0	0	0.449843	0
AnxB10	6977.08	10441.7	9301.04	2658.31	3239.29	3817.14	1196.88	1028.12	1070.83	8906.61	3238.25	1098.61
AnxB9	13929	18835.4	18020.6	11257	11747.2	13821.5	4596.71	3580.25	3122.43	16928.3	12275.2	3766.46
Aos1	527.201	717.112	690.406	227.912	294.177	326.305	500.495	387.735	429.278	644.906	282.798	439.169
Aph-4	522.371	567.114	518.456	294.678	261.625	202.241	188.701	150.847	147.458	535.98	252.848	162.335
Aplip1	147.688	199.448	201.518	108.815	165.289	157.025	83.8446	79.0729	60.668	182.885	143.71	74.5285
Aprt	494.505	672.161	578.755	307.407	396.296	425.926	333.333	357.274	307.551	581.807	376.543	332.719
Aps	1841.81	2414.31	2403.01	1239.84	1656.5	1739.84	1099.81	822.976	743.879	2219.71	1545.39	888.888
Arc1	4152.23	4977.69	5286.09	41797.4	58952.9	57759.5	7733.07	5791.67	5044.27	4805.34	52836.6	6189.67
Arc2	348.877	542.314	568.221	580.311	666.667	678.756	290.378	194.158	202.749	486.471	641.911	229.095
Arc42	1651.85	2115.23	2023.87	573.432	693.894	812.706	809.053	593.416	561.317	1930.32	693.344	654.595
Arf102F	3674.07	5398.15	5222.22	4279.84	5393	6609.05	8227.78	5916.67	5485.19	4764.81	5427.3	6543.21
Arf51F	2500.95	2415.24	2274.29	1580.46	1601.53	1877.39	2257.14	1653.33	1830.48	2396.83	1686.46	1913.65
Arf79F	8587.91	10963.4	10408.4	15698	15151	19250.5	13382.8	10430.4	10505.5	9986.57	16699.8	11439.6
ArfGAP1	1137.46	1420.94	1412.39	815.771	934.767	1163.44	633.185	535.714	514.881	1323.6	971.326	561.26
ArfGAP3	1312.8	1559.78	1616.55	1187.46	1317.66	1570.83	673.874	647.447	612.613	1496.38	1358.65	644.645
Arfip	362.441	517.371	534.272	356.256	462.273	508.118	364.762	300.952	310.476	471.361	442.216	325.397
Arfrp1	296.667	421.667	418.333	319.933	331.658	353.434	253.333	171.667	188.333	378.889	335.008	204.444
Arl2	492.754	541.667	568.841	377.609	464.896	514.231	340.58	217.391	242.754	534.421	452.245	266.908
Arl6	148.515	207.921	199.67	76.6667	76.6667	120	185.738	182.421	210.614	185.369	91.1111	192.924
Arp1	2096.63	2497.34	2336.88	2176.89	2554.67	2889.78	2133.87	1750.89	1781.03	2310.28	2540.45	1888.6
Arp3	866.029	1161.88	1086.12	883.293	960.032	1100.72	825.359	678.628	674.641	1038.01	981.348	726.209
Arp5	213.477	254.115	235.082	107.015	142.345	171.019	91.5133	85.8896	93.047	234.225	140.126	90.15
Arp53D	0	0	0	0.801282	0	0	0	0	0	0	0.267094	0
Arp6	683.417	863.484	867.672	127.624	225.021	265.323	113.903	105.528	94.6399	804.858	205.989	104.69
Arp8	170.236	233.388	220.209	87.3147	119.714	126.853	71.8629	64.1238	64.1238	207.944	111.294	66.7035
Arpc2	892.58	1183.83	1373.2	1122.22	1206.67	1416.67	2000	1602.44	1770.76	1149.87	1248.52	1791.07
Arpc3A	419.962	685.499	604.52	541.667	676.136	687.5	374.765	282.486	365.348	569.994	635.101	340.866
Arpc3B	132.184	162.835	153.257	13.4875	3.85356	9.63391	17.2414	21.0728	3.83142	149.425	8.99166	14.0485
Arpc4	1460.32	1827.38	1882.94	2235.53	2445.11	3173.65	4444.44	2982.14	2966.27	1723.55	2618.1	3464.28
Arpc5	825.607	860.927	832.23	620	662.222	740	536.424	384.106	397.351	839.588	674.074	439.294
Arr1	0.915751	28.3883	8.24176	4.59137	6.42792	44.9954	0	5.49451	7.32601	12.5153	18.6716	4.27351
Arr2	0	40.7315	14.9626	9.16667	18.3333	56.6667	0	0	1.66251	18.5647	28.0556	0.55417
Ars2	1345.35	1530.58	1450.69	1055.91	923.213	1146.85	1152.13	903.191	1023.05	1442.21	1041.99	1026.12
Art1	597.518	640.957	754.433	472.889	628.444	608	403.369	334.22	374.113	664.303	569.778	370.567
Art2	4.69484	2.8169	0.938967	1.8622	1.8622	3.72439	0	0.928505	0	2.8169	2.48293	0.309502
Art4	78.6164	111.321	154.717	51.0397	93.2577	61.7517	28.9308	28.9308	23.8994	114.885	68.683	27.2537
Art7	184.541	250.242	235.749	124.335	180.939	213.836	100.236	72.8132	89.8345	223.511	173.037	87.6279
Art8	157.38	181.818	145.65	21.5686	20.5882	21.5686	130.01	106.549	105.572	161.616	21.2418	114.044
Asap	491.775	644.733	604.906	393.992	452.051	501.733	371.245	321.668	312.044	580.471	449.259	334.986
AstA	4.41501	2.20751	11.0375	0	4.3573	0	0	0	0	5.88667	1.45243	0
AstA-R1	13.5364	21.9966	16.9205	2.54453	3.39271	5.08906	16.9205	15.2284	7.61421	17.4845	3.67543	13.2544
AstC	0	0	0	0	0	0	0	0	0	0	0	0
AstC-R1	13.1125	11.7322	15.1829	4.14938	4.84094	5.5325	26.225	13.1125	13.8026	13.3425	4.84094	17.7134
AstCC	0	0	0	0	0	0	0	0	0	0	0	0
Asx	279.609	411.624	398.842	187.3	218.149	268.229	241.414	202.7	179.075	363.358	224.559	207.73
Atac1	172.285	159.176	186.33	20.5415	33.6134	31.746	78.2689	67.2192	68.14	172.597	28.6336	71.2094
Atac2	97.3299	149.871	147.287	64.7084	71.5198	78.7569	71.3376	57.3248	56.4756	131.496	71.6617	61.7127
Atet	901.442	1117.39	988.782	1117.03	1373.28	1583.54	369.119	317.25	284.68	1002.54	1357.95	323.683
Atf-2	172.353	227.472	218.723	59.0829	56.4374	83.7743	39.5778	25.5057	43.0959	206.183	66.4315	36.0598
Atg12	561.562	531.532	456.456	196.825	219.048	209.524	501.502	318.318	315.315	516.517	208.466	378.378
Atg16	265.453	351.545	345.475	128.739	154.38	173.611	212.121	188.312	194.805	320.824	152.243	198.413
Atg17	507.001	704.741	672.316	599.556	841.301	1045.1	551.111	434.074	444.444	628.019	828.652	476.543
Atg2	649.003	805.701	770.899	455.246	565.248	708.53	492.472	422.269	423.845	741.868	576.341	446.195
Atg3	1026.26	1311.11	1262.63	736.789	868.902	1037.6	400.203	329.281	347.518	1200	881.097	359.001
Atg4b	316.866	409.182	412.675	104.827	138.957	150.658	134.71	99.8033	105.211	379.574	131.481	113.241
Atg5	431.227	499.38	467.162	362.55	438.247	430.279	239.157	180.917	177.2	465.923	410.359	199.091
Atg6	677.725	838.863	786.73	410.926	493.27	578.781	353.87	320.695	294.629	767.773	494.326	323.065
Atg8a	18812.7	24925.6	20721.8	26658.3	29938.9	35958.3	20895.3	17440.8	19013.8	21486.7	30851.8	19116.6
Atg8b	52.7778	41.6667	77.7778	67.2269	72.8291	89.6359	16.6667	22.2222	19.4444	57.4074	76.564	19.4444
Atg9	613.412	888.363	834.32	373.821	556.604	661.557	284.256	262.269	277.581	778.698	530.661	274.702
Atox1	1995.31	2657.28	2361.5	2342.86	2333.33	2914.29	2314.55	1854.46	1732.39	2338.03	2530.16	1967.13
AttC	611.421	536.212	798.05	1356.94	272.222	133.333	105.263	34.626	185.596	648.561	587.498	108.495
Atxn7	198.764	292.482	255.064	156.442	213.02	226.994	89.0716	75.3683	83.2477	248.77	198.819	82.5625
Aven	207.483	231.293	222.222	128.289	130.482	163.377	116.998	70.6402	87.1965	220.333	140.716	91.6116
Axs	372.033	465.944	509.804	386.967	515.288	590.977	371.371	349.349	353.854	449.26	497.744	358.191
Axud1	324.726	405.712	383.412	245.799	350.918	429.074	163.162	130.841	146.417	371.283	341.93	146.807
BBS8	139.041	178.506	162.113	48.496	71.2093	81.6452	28.0317	33.5161	28.6411	159.887	67.1168	30.063
BCAS2	232.614	305.755	315.348	216.435	278.935	274.306	295.374	227.758	233.689	284.572	256.559	252.274
BCL7-like	60.6061	112.554	145.022	145.969	126.362	180.828	43.29	38.961	56.2771	106.061	151.053	46.176
BEAF-32	554.77	732.627	647.821	310.304	457.845	487.119	256.773	242.638	254.417	645.073	418.423	251.276
BG642167	6.28931	3.14465	0	0	0	0	0	0	0	3.14465	0	0
BHD	157.246	204.348	193.478	89.6602	120.752	107.737	111.833	93.0736	90.1876	185.024	106.05	98.3647
BI-1	5602.72	8225.85	7434.01	5914.6	5644.63	7143.25	3010.97	2655.69	2792.87	7087.53	6234.16	2819.84
BM-40-SPARC	1362.94	1794.96	1869.52	1029.63	1103.7	1265.61	1243.93	1075.06	1023.18	1675.81	1132.98	1114.06
BRWD3	379.331	470.579	475.956	326.673	381.291	477.057	218.652	172.84	183.995	441.955	395.007	191.829
Bace	15.233	130.824	2.68817	0	0	1.79695	0	0.896057	0	49.5817	0.598983	0.298686
Bap170	222.946	293.049	297.986	110.848	159.566	151.479	103.127	81.3539	86.8963	271.327	140.631	90.4591
Bdbt	510.49	501.166	502.331	102.924	114.62	139.181	228.804	163.763	163.763	504.662	118.908	185.443
Bem46	280.079	394.477	326.43	359.882	361.849	392.33	210.784	194.118	185.294	333.662	371.354	196.732
Bet1	1131.05	1544.16	1515.67	2102.56	2672.36	3037.04	1079.1	765.537	754.237	1396.96	2603.99	866.291
BicC	0.368324	24.6777	520.81	10.9409	129.468	52.5164	2.18103	3.63504	37.0774	181.952	64.3084	14.2978
BigH1	4.72144	23.6072	283.286	0	55.3936	16.5209	0	4.80307	38.4246	103.872	23.9715	14.4092
Bin1	388.889	448.889	440	389.262	413.87	451.902	475.556	362.222	391.111	425.926	418.345	409.63
Bka	345	383.333	431.667	149.079	159.129	209.38	181.667	158.333	148.333	386.667	172.529	162.778
Blos1	569.161	746.032	594.104	83.3333	119.369	108.108	261.745	181.208	134.228	636.432	103.603	192.394
Blos2	557.652	549.266	595.388	550	508.333	602.083	447.205	341.615	304.348	567.435	553.472	364.389
Blos4	165.68	230.769	264.3	143.411	125.969	139.535	475.915	312.139	314.066	220.25	136.305	367.373
BobA	0	0	0	0	0	0	0	4.21941	0	0	0	1.40647
Brd	0	20.5761	0	0	0	0	0	0	0	6.8587	0	0
Brms1	656.371	814.672	797.941	379.665	460.746	557.272	123.077	93.5897	103.846	756.328	465.894	106.838
Bro	0	0	0	1.57233	0	0	0	0	0	0	0.52411	0
Bsg25A	0	0	0	0	0	0	0	0	0	0	0	0
Bsg25D	551.176	757.409	734.8	330.286	399.756	475.32	218.265	156.164	148.858	681.128	401.787	174.429
Btd	1.20555	4.82218	0.602773	0	0.606061	1.21212	5.40541	4.8048	2.4024	2.21017	0.60606	4.2042
Bteb2	0	0	0	0	0	0	0	0	0	0	0	0
Bub3	424.335	581.8	526.585	376.41	449.231	463.59	364.008	301.636	313.906	510.907	429.744	326.517
Buffy	1424.75	1898.55	1729.1	2399.55	2725.03	3188.55	1785.23	1713.65	1662.19	1684.13	2771.04	1720.36
Bug22	559.464	634.841	569.514	244.108	247.475	301.347	557.789	472.362	480.737	587.94	264.31	503.629
Burs	0	0	0	0	0	0	0	0	0	0	0	0
Bx42	853.748	957.952	957.952	637.416	909.811	992.078	438.564	386.253	460.462	923.217	846.435	428.426
Bzd	245.726	309.829	313.39	278.463	325.598	394.489	164.125	127.088	120.552	289.648	332.85	137.255
C1GalTA	637.457	964.777	957.904	287.801	319.588	341.924	263.068	207.369	188.518	853.379	316.438	219.652
CAH1	20034.6	32066.7	28328.4	13535.3	23091.7	23899.6	10402.5	8340.74	7075.31	26809.9	20175.5	8606.18
CCAP	0	0	2.15054	0	0	2.17865	0	0	0	0.716847	0.726217	0
CCHa1	58.6081	58.6081	51.2821	22.9167	16.6667	22.9167	1.92678	5.78035	11.5607	56.1661	20.8334	6.42261
CCHa2	281.863	230.392	272.059	82.0896	104.478	233.831	9.80392	4.90196	2.45098	261.438	140.133	5.71895
CDC45L	113.623	162.319	208.116	95.6522	174.493	166.377	55.5556	51.5046	58.4491	161.353	145.507	55.1698
CG10005	0	1.443	0	0	3.10078	3.10078	4.329	2.886	2.886	0.481	2.06719	3.367
CG10014	0	0	1.58353	0	1.56495	0	0	0	0	0.527843	0.52165	0
CG10026	603.448	712.644	731.034	197.232	194.925	316.032	852.874	727.586	616.092	682.375	236.063	732.184
CG10029	0	0.813008	0.813008	0	0	0	0	0	0	0.542005	0	0
CG10031	3157.62	3658.91	3253.23	912	1314.67	1709.33	46.5116	15.5039	10.3359	3356.59	1312	24.1171
CG10035	11.655	67.5991	27.972	8.21596	8.21596	10.5634	1.1655	2.331	1.1655	35.742	8.99844	1.554
CG10050	55.7769	83.6653	77.0252	53.5475	60.241	69.6118	41.3333	13.3333	22.6667	72.1558	61.1334	25.7778
CG10051	4.23403	9.62279	5.00385	0.385356	0.385356	0	0.769823	0.384911	1.92456	6.28689	0.256904	1.02643
CG10053	192.982	206.767	209.273	185.606	122.475	171.717	218.868	143.396	149.686	203.007	159.933	170.65
CG10063	0	1.57233	1.57233	4.44444	4.44444	5.92593	8.77193	13.1579	13.1579	1.04822	4.93827	11.6959
CG10068	629.747	728.903	709.916	416.931	489.947	550.265	946.203	765.823	858.65	689.522	485.714	856.892
CG10075	756.757	924.067	978.121	338.501	437.984	498.708	433.719	287.001	362.934	886.315	425.064	361.218
CG10077	4621.84	6792.18	6283.21	2275.13	3215.71	3520.55	1924.84	1453.02	1483.66	5899.08	3003.8	1620.51
CG10098	627.007	728.045	728.99	435.897	580.247	646.724	380.682	312.5	306.818	694.681	554.289	333.333
CG10104	0	0	0	0	0	0	0	0	0	0	0	0
CG10116	6.92042	6.92042	4.61361	0	0	0	0	0	0	6.15148	0	0
CG10126	4277.52	5251.16	5209.3	1456.9	1035.92	1284.48	1474.3	1035.24	1022.03	4912.66	1259.1	1177.19
CG10131	113.228	73.0159	76.1905	5.30786	6.36943	9.55414	1.99601	1.99601	0.998004	87.4781	7.07714	1.66334
CG10133	225.738	236.287	217.3	110.053	103.704	137.566	110.759	80.1688	91.7722	226.442	117.108	94.2333
CG10139	473.214	473.214	513.393	370.703	408.072	406.577	342.262	270.833	221.726	486.607	395.117	278.274
CG10147	175.595	267.113	237.351	88.3621	90.5172	102.011	72.6496	49.1453	41.3105	226.686	93.6301	54.3685
CG10163	0	2.6455	6.17284	0	0.888889	0	0	0	0	2.93945	0.296296	0
CG10164	0	0	0	0	0	0.881057	0	0	0	0	0.293686	0
CG10171	118.182	253.535	216.162	255.319	382.979	464.032	72.8543	49.9002	42.9142	195.96	367.443	55.2229
CG10176	2951.59	3957.12	3301.52	2385.33	2305.33	2794.67	4737.21	3582.3	3767.63	3403.41	2495.11	4029.05
CG10177	0	0	0.81103	0	0	0	0	0	0	0.270343	0	0
CG10178	178.616	206.289	220.126	78.1348	69.3132	90.1071	115.094	89.3082	96.8553	201.677	79.185	100.419
CG10184	151.436	195.822	191.471	47.993	65.445	78.534	18.2768	15.6658	11.3142	179.576	63.9907	15.0856
CG10188	200.917	287.497	297.937	217.137	234.172	266.718	159.553	119.919	126.016	262.117	239.342	135.163
CG10189	224.691	268.313	291.358	38.048	71.1332	73.6146	94.8845	93.2343	96.5347	261.454	60.9319	94.8845
CG10195	360.111	481.071	457.987	132.407	221.296	233.333	166.205	143.121	155.125	433.056	195.679	154.817
CG10202	1.59236	1.06157	0	0.531632	2.65816	2.65816	0	0	0	0.884643	1.94932	0
CG10205	20721.7	27791.7	24233.6	6091.7	5196.51	6991.27	32033	25284.5	24599.1	24249	6093.16	27305.5
CG10208	210.145	263.285	199.275	223.862	286.593	237.392	53.9216	42.8922	49.0196	224.235	249.282	48.6111
CG10211	6668.1	8110.23	7912.96	868.39	648.241	870.304	3503.35	3039.93	2600.43	7563.76	795.645	3047.9
CG10214	454.976	507.109	447.077	56.5749	87.156	85.6269	82.1918	65.449	56.3166	469.721	76.4526	67.9858
CG10217	2417.34	3000.54	2809.37	1270.34	1442.38	1690.88	1526.48	1292.67	1398.07	2742.42	1467.87	1405.74
CG10219	4622.71	6485.35	6058.61	2079.19	3267.03	3488.03	3029.14	2318.76	2326.05	5722.22	2944.75	2557.98
CG10253	108.822	148.97	121.5	50.6792	48.0669	59.0387	24.0712	17.2684	21.4547	126.431	52.5949	20.9314
CG10257	290.936	305.556	289.474	99.8532	170.338	142.438	157.895	131.579	130.117	295.322	137.543	139.864
CG10262	149.02	206.536	203.922	355.643	353.018	360.892	183.007	133.333	133.333	186.493	356.518	149.891
CG10264	0	0	2.46914	0	0	1.32802	0	0	0	0.823047	0.442673	0
CG10265	92.1569	94.1176	99.0196	25.7827	20.2578	26.7035	75.543	64.2115	54.7686	95.098	24.248	64.841
CG10286	288	319.467	294.4	265.393	321.656	350.849	387.917	320.085	375.729	300.622	312.633	361.244
CG10289	796.838	1116.04	1052.14	453.667	517.667	677	596.72	516.399	475.234	988.339	549.445	529.451
CG10306	3022.52	3381.38	3327.33	2648.57	2996.98	3387.63	2813.81	2252.25	2457.96	3243.74	3011.06	2508.01
CG10307	365.591	502.444	612.903	146.199	183.236	226.121	37.5	18.75	19.7917	493.646	185.185	25.3472
CG10311	1210.1	1993.94	2173.74	768.293	790.65	1024.39	583.838	466.667	509.091	1792.59	861.111	519.865
CG10320	5163.64	6178.79	5821.21	1925.23	2753.89	3429.91	1618.18	1172.73	945.455	5721.21	2703.01	1245.45
CG10324	121.547	157.152	157.152	190.898	179.669	196.217	107.121	96.3495	80.7899	145.284	188.928	94.7535
CG10326	952.623	1439.93	1365.48	522.109	574.83	678.571	708.968	588.832	595.601	1252.68	591.837	631.134
CG10333	477.697	566.099	474.453	265.854	252.439	260.163	306.878	247.863	303.622	506.083	259.485	286.121
CG10336	10.8578	21.7155	56.4604	28.2302	49.9457	45.6026	22.7273	28.1385	36.7965	29.6779	41.2595	29.2208
CG10337	203.626	291.492	343.096	701.681	568.627	834.734	188.285	157.601	149.233	279.405	701.681	165.04
CG10339	820.896	930.901	857.933	519.135	467.554	606.212	676.633	627.907	600.221	869.91	530.967	634.92
CG10343	295.95	450.156	380.062	367.762	312.989	380.282	410.377	312.893	361.635	375.389	353.678	361.635
CG10344	270.983	275.779	248.201	79.4224	87.846	84.2359	118.705	83.9329	79.1367	264.988	83.8348	93.9249
CG10348	214.815	233.951	203.704	17.4782	28.0899	23.0961	4.32099	7.40741	3.08642	217.49	22.8881	4.93827
CG10352	74.0741	84.6561	101.587	1.05152	0	0	5.24109	3.14465	4.19287	86.7724	0.350507	4.19287
CG10353	664.973	849.593	860.772	583.915	724.826	845.464	740.445	626.786	613.493	791.779	718.068	660.241
CG10362	63.9666	102.218	82.9315	58.4291	78.5441	87.8033	19.6451	23.4474	19.3283	83.0387	74.9255	20.8069
CG10365	510.563	545.775	607.981	346.764	504.274	606.838	1177.16	789.044	796.037	554.773	485.959	920.747
CG10366	210.496	261.822	259.516	112.054	173.175	193.548	149.718	114.689	118.079	243.945	159.592	127.495
CG10375	738.845	847.769	796.588	424.242	582.345	595.52	501.312	381.89	414.698	794.401	534.036	432.633
CG10376	423.676	669.003	595.016	356.808	409.233	440.532	346.604	265.418	283.372	562.565	402.191	298.465
CG10383	526.361	709.184	686.65	218.724	300.588	364.4	217.191	173.166	225.157	640.732	294.571	205.171
CG10396	13.2576	26.5152	7.57576	0	0	0	1.8315	1.8315	5.49451	15.7829	0	3.0525
CG10399	140.351	179.567	156.863	35.1967	47.619	51.7598	99.0712	92.8793	95.9752	158.927	44.8585	95.9752
CG10407	41.184	83.6551	106.821	3.87597	9.04393	18.0879	20.592	20.592	18.018	77.22	10.3359	19.734
CG1041	1448.14	1797.08	1635.95	686.484	771.341	818.089	959.248	789.446	886.102	1627.06	758.638	878.265
CG10413	740.347	984.06	977.683	384.343	459.086	508.679	2213.38	2048.12	1818.47	900.697	450.703	2026.66
CG10418	407.018	298.246	319.298	102.837	120.567	138.298	326.316	284.211	231.579	341.521	120.567	280.702
CG10425	520.833	682.54	670.635	785.075	857.711	985.075	263.889	223.214	233.135	624.669	875.954	240.079
CG10426	84.7836	108.88	116.912	58.4872	70.8004	74.3184	75.859	78.5364	71.3967	103.525	67.8687	75.264
CG10428	140.171	174.359	196.581	27.3973	34.2466	31.9635	45.0142	33.6182	42.1652	170.37	31.2025	40.2659
CG10431	30.1837	45.0569	37.6203	37.6697	40.2979	38.9838	72.1785	61.2423	60.8049	37.6203	38.9838	64.7419
CG10435	500.337	657.239	589.899	279.528	354.331	388.451	214.042	174.506	177.232	582.492	340.77	188.593
CG10444	681.431	908.575	860.307	166.667	191.695	224.687	99.3754	103.918	86.8825	816.771	194.35	96.7253
CG10463	142.936	131.898	129.691	37.8174	42.1394	39.4381	64.4986	52.5745	57.4526	134.842	39.7983	58.1752
CG10465	965.67	1918.05	1828.35	1708.89	1980	2488.89	1534.88	1191.58	1187.15	1570.69	2059.26	1304.54
CG10466	140.693	116.883	164.502	168.831	196.97	235.931	365.591	234.409	249.462	140.693	200.577	283.154
CG10470	1291.44	1074.68	1038.25	957.875	880.952	1113.55	1304.19	1087.43	863.388	1134.79	984.126	1085
CG10479	29.1005	58.2011	51.1464	46.8612	46.8612	38.0195	483.556	382.222	432.889	46.1493	43.914	432.889
CG10505	2.03252	1.77846	1.01626	2.28833	3.55962	5.08518	64.3853	51.2041	53.2319	1.60908	3.64438	56.2738
CG10508	725.41	873.862	780.055	24.7413	18.8934	33.7382	68.3877	58.8768	57.5181	793.109	25.791	61.5942
CG10510	0.637349	1.91205	3.18674	0	0.639795	0	0	0	0	1.91205	0.213265	0
CG10527	14564.2	20662.2	19547.3	6986.44	8376.27	9555.93	4009.01	3222.97	2922.3	18257.9	8306.21	3384.76
CG10561	377.646	560.185	509.921	243.918	274.162	334.648	143.045	127.953	129.265	482.584	284.243	133.421
CG10565	1091.85	1252.84	1252.84	532.414	671.261	766.207	692.347	547.509	635.85	1199.18	656.627	625.235
CG10566	107.056	134.631	109.489	46.2287	63.2603	63.2603	79.288	58.2524	59.8706	117.059	57.5831	65.8037
CG10570	42634.7	52091.3	45406.4	12814.3	11885.7	16790.5	10125.6	6115.94	8908.21	46710.8	13830.2	8383.25
CG10576	2491.9	2881.5	2861.04	2058.12	2438.46	2766.67	1838.87	1507.25	1508.95	2744.81	2421.08	1618.36
CG10581	128.748	149.912	137.566	31.4815	37.037	48.1481	39.9306	24.3056	29.5139	138.742	38.8889	31.25
CG10584	364.964	409.976	396.594	152.625	167.277	162.393	144.769	124.088	150.852	390.511	160.765	139.903
CG10589	0	0	0	0	0	0	0	0	0	0	0	0
CG10590	761.824	1059.68	1041.67	1252.37	1293.69	1592.96	886.845	788.74	717.949	954.391	1379.67	797.845
CG10591	1.06838	0	0	0	0	0	6.34921	3.1746	2.1164	0.356127	0	3.88007
CG10592	0	6.36132	1.9084	0	0	1.29955	38.8783	117.272	62.4602	2.75657	0.433183	72.8702
CG10616	551.491	762.195	781.165	546.504	617.787	678.887	729.659	627.953	582.021	698.284	614.393	646.544
CG10621	132.931	149.043	140.987	220.202	352.525	466.667	105.74	71.5005	75.5287	140.987	346.465	84.2564
CG10623	910.373	1087.61	1002.01	346.465	346.465	405.051	604.23	494.461	551.863	999.998	365.994	550.185
CG10628	288.947	379.46	362.924	77.6614	121.291	116.056	118.364	98.3464	106.179	343.777	105.003	107.63
CG10635	1393.72	1567.63	1434.78	437.956	374.696	459.854	814.01	495.169	557.971	1465.38	424.169	622.383
CG10639	621.245	759.707	697.436	476.505	538.179	678.414	231.788	183.959	228.109	692.796	564.366	214.619
CG10654	50.9499	43.1779	40.5872	8.70322	10.4439	4.35161	3.4632	2.5974	0.865801	44.905	7.83291	2.3088
CG10659	0	0	0	0	0	0	0	0	0	0	0	0
CG10660	302.533	318.96	327.173	189.882	210.672	279.972	164.592	121.024	127.939	316.222	226.842	137.852
CG10671	1501.97	1852.64	1712.37	1070.22	1320.99	1547.07	795.114	695.823	762.805	1688.99	1312.76	751.247
CG10674	1114.2	1293.21	1191.36	1367.6	1261.68	1641.74	3225.31	2182.1	2095.68	1199.59	1423.67	2501.03
CG10694	0	0	0	0	0	0	0	0	0	0	0	0
CG10702	54.6159	54.2636	59.549	54.6099	80.8511	65.9574	44.2321	29.724	34.3241	56.1428	67.1395	36.0934
CG10710	78.9845	141.044	114.716	6.1553	17.5189	15.1515	5.68182	1.89394	4.73485	111.582	12.9419	4.10354
CG10713	16.8421	18.2456	19.6491	6.74764	10.1215	16.1943	7.48299	3.40136	4.7619	18.2456	11.0211	5.21542
CG10725	0	0	0	7.5188	1.25313	1.25313	0	0	0	0	3.34169	0
CG10731	274.22	323.481	303.777	226.073	194.719	250.825	262.726	198.686	200.328	300.493	223.872	220.58
CG10738	10.6838	10.9509	16.8269	2.4077	1.33761	2.4077	1.86816	1.86816	1.86816	12.8205	2.051	1.86816
CG1074	353.825	448.087	408.47	135.307	178.295	204.369	121.585	90.1639	103.825	403.461	172.657	105.191
CG10747	1491.87	1928.86	1921.75	507.886	581.493	696.109	888.889	614.256	581.761	1780.83	595.163	694.969
CG10748	0	0	0	0	0	0	0	0	0	0	0	0
CG10749	0	0	0	0	0	0	0	0.960615	0	0	0	0.320205
CG10750	0	0	0	0	0	1.0101	0	0	0	0	0.3367	0
CG10754	695.707	868.687	835.859	510.256	587.179	706.41	694.764	526.181	550.447	800.084	601.282	590.464
CG10761	0	0	1.03199	0	0	0.998004	0	0	0	0.343997	0.332668	0
CG1077	0	4.10959	22.8311	0	0.914495	0.914495	0	0	0	8.98023	0.609663	0
CG10777	362.257	655.379	579.894	542.208	703.824	817.821	231.541	175.986	153.405	532.51	687.951	186.977
CG10778	464.444	570	487.778	408.027	501.672	580.825	154.444	135.556	126.667	507.407	496.841	138.889
CG10799	206.827	230.924	267.068	831.014	1049.7	1487.08	67.9012	37.037	26.749	234.94	1122.6	43.8957
CG10802	492.355	624.618	638.379	403.67	502.294	642.202	130.137	108.067	142.314	585.117	516.055	126.839
CG10809	202.048	254.19	227.188	122.711	173.077	181.319	94.0639	65.7534	60.274	227.809	159.036	73.3638
CG10814	39.801	16.5837	60.5307	19.802	58.5809	61.0561	0	0.823045	1.64609	38.9718	46.4797	0.823045
CG10822	0	0	0	0	0	0	0	0	0	0	0	0
CG10834	0	0	3.43643	0	0	0	0	0	0	1.14548	0	0
CG10839	0	0	0	0	0	0	0	0	0	0	0	0
CG10841	2.74725	6.41026	5.95238	0.917011	0.458505	1.37552	0.915751	0	0	5.03663	0.917012	0.30525
CG10859	4.78469	1.5949	1.06326	1.5949	1.06326	4.25306	0	0	0	2.48095	2.30374	0
CG10864	14.5673	17.9949	24.85	16.3652	8.61326	17.2265	6.92641	10.3896	10.3896	19.1374	14.0683	9.2352
CG10869	4.55235	4.55235	5.56399	0	0	0	0	0	0	4.88956	0	0
CG10898	259.804	344.118	301.961	200.375	231.273	214.419	113.725	99.0196	105.882	301.961	215.356	106.209
CG10899	0	3.58423	4.77897	0	0	0	0	0	0	2.78773	0	0
CG10903	298.309	442.029	421.498	322.424	381.818	393.939	265.7	240.338	229.469	387.279	366.06	245.169
CG10904	403.509	401.003	413.534	114.035	124.06	115.288	184.211	167.92	156.642	406.015	117.794	169.591
CG10907	122.842	137.45	144.754	116.9	130.929	136.941	237.809	189.045	255.177	135.015	128.257	227.344
CG1091	782.143	1113.69	1016.07	378.867	509.048	539.405	387.06	291.739	319.469	970.634	475.773	332.756
CG10912	0	15.9902	1.23001	5.12821	6.41026	7.69231	22.9008	8.90585	11.4504	5.74007	6.41026	14.419
CG10914	126.603	151.175	150.107	35.3698	56.806	57.8778	54.0396	46.0139	46.549	142.628	50.0179	48.8675
CG10915	344.28	573.071	555.008	226.269	338.852	360.927	196.595	145.524	149.368	490.786	308.683	163.829
CG10919	1.78253	1.78253	3.56506	1.79211	0	1.79211	1.78253	0	0	2.37671	1.19474	0.594177
CG1092	103.215	98.9848	125.212	33.0789	57.676	83.9695	10.9983	3.38409	9.30626	109.137	58.2415	7.89622
CG10920	0	0	0	0	0	0	0	0	0	0	0	0
CG10932	952.033	1415.45	1290.24	766.096	1008.96	1116.54	430.081	315.447	386.992	1219.24	963.865	377.507
CG10933	206.573	208.451	241.315	213.748	184.557	225.047	177.465	130.516	109.859	218.78	207.784	139.28
CG10936	229.878	269.029	281.934	25.0757	23.9948	37.1812	42.2352	28.1568	38.5532	260.28	28.7506	36.3151
CG10947	278.053	412.541	575.083	277.504	394.089	552.545	380.131	255.337	215.928	421.892	408.046	283.799
CG10949	179.375	238.199	225.127	23.2897	29.1121	26.2009	86.4198	71.8954	58.8235	214.234	26.2009	72.3796
CG10950	3.41297	2.84414	4.55063	0	0	0	0	0	0	3.60258	0	0
CG10962	143.24	116.466	164.659	24.1935	51.0753	60.4839	4.01606	1.33869	1.33869	141.455	45.2509	2.23115
CG10970	3.23625	6.47249	0	6.53595	16.3399	19.6078	0	0	9.70874	3.23625	14.1612	3.23625
CG10979	348.627	507.125	452.555	351.986	480.829	533.333	427.181	339.937	364.268	436.102	455.383	377.129
CG10996	6.80272	2.55102	0.85034	2.55754	0.852515	2.55754	0	0	0	3.40136	1.9892	0
CG11007	246.002	319.803	327.183	86.6911	117.216	96.4591	319.803	268.143	281.673	297.663	100.122	289.873
CG11018	0	0	0	0	0	0	0	0	0	0	0	0
CG1103	231.884	320.29	366.667	172.619	202.381	264.881	712.593	561.481	585.185	306.28	213.294	619.753
CG11030	494.98	533.133	506.024	198.225	215.976	254.438	161.677	102.794	138.723	511.379	222.88	134.398
CG11034	161.562	244.119	238.793	70.6667	70.6667	72	127.111	121.333	121.778	214.825	71.1111	123.407
CG11035	506.494	489.177	515.152	349.275	337.681	492.754	512.266	372.294	369.408	503.608	393.237	417.989
CG11041	0	8.60215	12.9032	12.9032	25.8065	27.957	4.30108	10.7527	6.45161	7.16845	22.2222	7.16846
CG11044	120.026	143.509	181.344	29.4118	44.4444	43.7908	23.4834	11.7417	8.4801	148.293	39.2157	14.5684
CG1105	1371.25	1700.63	1739.34	1639.02	1529.23	1919.43	2338.06	2035.46	1940.11	1603.74	1695.89	2104.54
CG11050	2623.71	3348.8	3622.85	2751.07	3798.81	4160.27	4028.06	3211.73	3127.55	3198.45	3570.05	3455.78
CG11052	2.23714	0	0	0	0	0	0	0	0	0.745713	0	0
CG11068	2.22965	1.11483	5.57414	3.31126	4.41501	2.20751	0	0	0	2.97287	3.31126	0
CG11069	644.04	1092.72	855.408	140.962	154.229	189.608	324.503	271.523	244.481	864.056	161.6	280.169
CG11070	646.19	862.706	806.982	571.14	671.039	758.829	698.253	596.102	680.78	771.959	667.003	658.378
CG11073	6538.51	8558.08	7917.61	6281.29	7688.06	9099.3	3274.38	2769.6	3072.02	7671.4	7689.55	3038.67
CG11077	1142.86	1313.49	1321.43	188.492	144.841	214.286	0	3.96825	1.98413	1259.26	182.54	1.98413
CG11089	237.853	282.486	306.215	155.065	239.389	307.866	127.684	111.864	98.8701	275.518	234.107	112.806
CG11095	183.746	292.108	275.618	285.714	360.714	430.952	120.567	91.0165	82.7423	250.491	359.127	98.1086
CG11099	114.638	130.511	134.921	62.0567	55.8511	76.2411	162.688	130.858	127.321	126.69	64.7163	140.289
CG11107	756.744	889.803	896.662	512.609	612.563	732.233	502.289	445.971	391.941	847.736	619.135	446.734
CG11110	175.439	220.273	177.388	164.706	270.588	280.392	83.8207	70.1754	58.4795	191.033	238.562	70.8252
CG11123	217.544	243.609	218.546	161.339	166.92	156.266	99.2908	81.0537	89.1591	226.566	161.508	89.8345
CG11125	155.498	219.072	213.058	22.3945	18.0879	18.9492	24.055	27.4914	22.3368	195.876	19.8105	24.6277
CG11127	466.221	634.744	613.957	42.5209	58.4662	88.8383	182.232	160.972	208.808	571.641	63.2751	184.004
CG11131	0	0	0	0	0	0	1.48148	1.48148	0	0	0	0.987653
CG11134	440.529	506.608	512.482	180.741	180.741	176.296	436.123	303.965	305.433	486.54	179.259	348.507
CG11137	3773.09	3895.58	3837.35	1283.52	1429.12	1559.39	2463.86	1702.81	1692.77	3835.34	1424.01	1953.15
CG11141	413.146	541.315	486.385	200.661	237.016	253.541	121.813	104.816	102.455	480.282	230.406	109.695
CG11145	0	0	0	0	0	2.26757	0	0	0	0	0.755857	0
CG11147	5757.62	8128.93	7336.62	4174.65	4340.85	4917.84	3507.27	3197.37	2989.22	7074.39	4477.78	3231.29
CG11148	1039.57	1575.41	1573.71	773.157	915.144	1083.81	1365.61	1144.73	1168.14	1396.23	924.037	1226.16
CG11151	17608.7	22400	20426.1	13924	12114	15213.5	8759.42	5655.07	5069.57	20144.9	13750.5	6494.69
CG11158	490.31	574.612	480.62	237.817	343.08	332.359	219.631	211.856	186.589	515.181	304.419	206.025
CG11162	0	0	0	0	0	0	0	0	0	0	0	0
CG11164	37.2549	58.8235	72.549	46.2144	62.9302	63.9135	11.7994	15.7325	11.7994	56.2091	57.686	13.1104
CG11168	386.636	492.468	480.881	224.05	278.496	312.182	229.899	199.063	221.311	453.328	271.576	216.758
CG11170	113.985	148.467	165.709	83.5655	100.279	92.8505	56.6763	51.8732	48.0307	142.72	92.2317	52.1934
CG11178	178.689	222.065	233.852	152.246	177.778	200.473	138.534	113.002	110.638	211.535	176.832	120.725
CG11190	1023.17	1174.3	1052.13	313.228	441.799	484.656	224.893	203.526	201.389	1083.2	413.228	209.936
CG11191	488.449	656.766	592.959	167.235	232.082	268.487	235.16	223.744	216.895	579.391	222.601	225.266
CG11192	0	0	0	0	0	0	0	0	0	0	0	0
CG11200	2209.39	2572.77	2304.23	1322.03	1378.53	1657.25	2633.8	2295.77	2284.51	2362.13	1452.6	2404.69
CG11208	900.235	1144.95	1112.09	883.598	1246.33	1380.95	648.474	558.099	577.465	1052.42	1170.29	594.679
CG11210	1105.7	1499.56	1417.54	1405.11	1568.47	1777.19	1457.34	1251.54	1293.76	1340.93	1583.59	1334.21
CG11221	30.7018	38.7427	37.2807	14.5243	17.4292	18.1554	8.04094	3.65497	0.730994	35.5751	16.703	4.1423
CG11226	13.6054	3.40136	1.70068	1.7452	1.7452	0	0	0	0	6.23581	1.16347	0
CG11236	117.302	120.235	155.425	10.7843	5.88235	15.6863	9.77517	4.88759	3.91007	130.987	10.7843	6.19094
CG1124	53661.2	62416	60272.4	13318.4	15040.8	16661.2	1139.57	945.799	738.482	58783.2	15006.8	941.284
CG11241	316.273	486.22	437.008	76.9733	74.364	127.202	15.4739	18.0529	11.6054	413.167	92.8464	15.0441
CG11247	406.769	456.577	448.914	118.362	177.863	146.513	286.718	208.812	240.102	437.42	147.579	245.211
CG11248	159.036	220.884	227.309	208.433	221.559	264.916	137.068	124.752	104.887	202.41	231.636	122.236
CG11249	0	0	1.03842	1.03681	2.07361	3.11042	1.0352	0	0	0.34614	2.07361	0.345067
CG11251	0	0	0	0	0	0	0	0	0	0	0	0
CG11257	155.14	196.885	191.277	43.9085	43.9085	51.9481	123.457	101.235	109.877	181.101	46.5884	111.523
CG11267	1880.26	1711.97	1841.42	1790.85	2486.93	2640.52	2071.2	1323.62	1533.98	1811.22	2306.1	1642.93
CG11269	0	0	0	0	0	0	0	0	0	0	0	0
CG11275	2084.73	2962.43	2494	1404.65	2274.84	2765.22	772.982	664.269	838.529	2513.72	2148.24	758.593
CG11279	496.732	493.464	434.641	214.521	168.317	231.023	604.575	431.373	519.608	474.946	204.62	518.519
CG11289	6.64011	7.30412	6.64011	0	0	0	1.32013	0.660066	1.32013	6.86145	0	1.10011
CG11298	0	0	0	0	0	2.09644	2.08333	2.08333	0	0	0.698813	1.38889
CG11307	167.492	203.795	215.347	193.069	236.799	240.099	534.979	440.329	409.053	195.545	223.322	461.454
CG11309	2326.63	2747.13	2753.83	1902.7	1904.62	2186.9	1053.79	849.183	955.812	2609.2	1998.07	952.928
CG11318	0.415628	1.24688	0	0.834376	0	1.66875	0	0	0	0.554169	0.834375	0
CG11320	0	2.65957	1.77305	0.839631	0	0.839631	0.886525	0.886525	0.886525	1.47754	0.559754	0.886525
CG11333	0	0	0	0	0	1.64204	0	0	0	0	0.547347	0
CG11340	0	0.633714	0.633714	0	0	1.25549	0	0	0.627746	0.422476	0.418497	0.209249
CG11342	61.6246	113.445	121.849	15.4712	12.6582	25.3165	85.4342	47.619	51.8207	98.9729	17.8153	61.6246
CG1136	374.818	494.178	498.544	343.727	412.027	498.886	69.1412	55.313	64.0466	455.847	418.213	62.8336
CG11368	205892	265636	217815	184909	210753	256258	80391.5	71396.8	63423.3	229781	217307	71737.2
CG11369	0	0	0	0	0	0	0	0	0	0	0	0
CG11373	0	0	0	0	0	0	0	0	0	0	0	0
CG11377	1096.26	1354.72	1368.98	708.333	645.39	766.844	483.643	395.225	356.322	1273.32	706.856	411.73
CG11378	1215.81	1542.74	1454.06	3821.09	4151.22	4722.04	45.6476	21.2314	37.155	1404.2	4231.45	34.678
CG11379	0	0	0	0	0	0	0	0	0	0	0	0
CG11382	0	0.660066	7.26073	0	0	0.649773	0	0	0	2.64027	0.216591	0
CG11384	0	0.566893	0.566893	0	0.591017	0.591017	0	0	0	0.377929	0.394011	0
CG1139	31.7812	48.7805	39.1722	2.96296	2.96296	4.44444	0	0	0	39.9113	3.45679	0
CG11391	47.3555	93.4809	79.3358	11.7067	3.08071	1.84843	0	1.23001	0	73.3907	5.54528	0.410003
CG11399	317.029	418.116	483.333	201.954	290.626	292.436	99.06	95.8062	83.1526	406.159	261.672	92.6729
CG11400	979.798	1042.09	1013.47	2395.26	2448.09	3178.51	113.99	58.7219	53.5406	1011.79	2673.95	75.4175
CG11403	67.7507	75.4936	90.2052	9.78091	27.3865	22.6917	55.0996	47.6749	44.5487	77.8165	19.953	49.1077
CG11404	0	0	0	0	0	0	0	0	0	0	0	0
CG11407	20917	24895.9	21584.3	0	0	0.618429	0	0	0	22465.7	0.206143	0
CG11409	74.2768	77.1436	67.24	3.60082	2.31481	7.97325	16.9492	8.98819	13.0971	72.8868	4.62963	13.0115
CG11412	800.177	976.127	1056.59	310.997	475.945	493.127	269.43	231.434	240.933	944.298	426.69	247.266
CG11413	14.0845	11.7371	18.7793	0	0	2.28311	0	0	0	14.867	0.761037	0
CG11414	741.253	909.266	932.718	422.783	509.939	576.07	292.002	239.954	261.385	861.079	502.931	264.447
CG11417	229.14	280.588	286.208	66.242	88.3227	98.9384	59.126	34.2759	53.1277	265.312	84.501	48.8432
CG11425	1394.54	1744.26	1695.08	202.222	262.222	217.778	48.7265	45.4042	38.7597	1611.29	227.407	44.2968
CG11426	620.588	1021.57	892.157	1178.57	1912.7	1891.87	259.587	259.587	247.788	844.772	1661.05	255.654
CG11436	155.556	204.301	194.265	55.3161	82.6149	83.3333	39.4265	32.2581	30.8244	184.707	73.7548	34.1697
CG11437	37.1585	78.6885	60.1093	2.18579	7.65027	4.37158	2.18579	0	4.37158	58.6521	4.73588	2.18579
CG11444	1824.81	2534.88	2440.31	2306.98	2860.47	3373.64	859.155	768.388	633.803	2266.67	2847.03	753.782
CG11447	406.667	528	478.667	63.4278	114.71	117.409	126.667	100	102.667	471.111	98.5156	109.778
CG11453	77.9221	95.2381	104.515	7.76583	2.98686	11.9474	1.23686	0	1.23686	92.5584	7.5667	0.824573
CG11454	721.289	663.866	698.88	351.541	466.387	456.583	165.969	115.76	135.286	694.678	424.837	139.005
CG1146	821.164	1044.44	1221.16	632.804	863.492	1151.32	191.983	140.295	112.869	1028.92	882.539	148.382
CG11523	398.734	516.878	603.376	357.616	331.126	487.859	273.118	240.86	303.226	506.329	392.2	272.401
CG11529	59.2334	58.072	65.0407	562.137	396.051	781.649	65.2921	50.4009	52.6919	60.782	579.946	56.1283
CG11534	370.596	477.642	488.482	249.827	325.742	377.502	278.237	252.755	273.416	445.573	317.69	268.136
CG11539	215	268.333	248.333	129.63	117.845	166.667	84.6024	71.066	62.6058	243.889	138.047	72.7581
CG11550	39712.5	57267.3	49114.1	9580.25	13133.6	15005.6	41377	33516.8	38211.4	48698	12573.1	37701.7
CG11562	298.667	421.333	349.333	53.9906	107.981	86.8545	69.9301	67.5991	95.5711	356.444	82.942	77.7001
CG11563	391.304	471.82	463.768	559.871	512.945	608.414	225.443	169.082	188.406	442.297	560.41	194.31
CG11576	2937.71	3926.08	3475.7	1122.77	1296.3	1338.82	232.033	206.023	188.912	3446.5	1252.63	208.989
CG11581	0	0	0	0	0	0	0	0	0	0	0	0
CG11583	387.64	437.266	418.539	380.817	389.364	436.847	401.685	319.288	287.453	414.482	402.343	336.142
CG11586	412.371	412.371	455.326	240.069	221.071	265.976	304.124	207.904	216.495	426.689	242.372	242.841
CG11590	632.997	685.185	661.616	599.656	632.302	900.344	183.849	161.512	121.993	659.933	710.767	155.785
CG11596	263.889	328.216	391.813	204.464	229.662	255.58	114.035	116.228	102.339	327.973	229.902	110.867
CG11619	7.15308	10.0143	10.0143	0	0	0	0	0.476872	0.953743	9.06056	0	0.476872
CG11629	0	0	0	0	0	0	0	0	0	0	0	0
CG11634	0	0	0	0	0	0	0	0	0	0	0	0
CG11635	37.296	24.4755	24.4755	15.6438	13.2371	14.4404	14.1343	17.6678	8.24499	28.749	14.4404	13.349
CG11638	108.527	103.359	78.3807	9.49914	14.6805	17.2712	14.1093	10.582	14.1093	96.7556	13.8169	12.9335
CG11652	1449.34	2642.44	1734.95	2378.96	3171.45	4006.62	1318.65	1142.44	1447.87	1942.24	3185.68	1302.99
CG11655	1119.41	1567.03	1453.48	1528.53	2249.25	2527.03	1584.46	1426.09	1472.1	1379.97	2101.6	1494.22
CG11656	1.14548	1.14548	1.14548	1.24844	0	0	0	0	0	1.14548	0.416147	0
CG11659	0	0	0	0	0	0	0	1.8622	1.24146	0	0	1.03455
CG11663	0	0	0	0	0	2.25225	0	0	2.36407	0	0.75075	0.788023
CG11664	0	0	0	0	0	0	0	0	0	0	0	0
CG11666	0	0	0	0	0	0	0	0	0	0	0	0
CG11672	0	1.38889	0	0	0	0	0	0	0	0.462963	0	0
CG11674	0	10.6589	98.8372	101.365	207.602	174.464	5.7971	3.86473	4.83092	36.4987	161.144	4.83092
CG11679	328.571	384.921	360.317	105.595	135.54	136.328	125.49	95.6863	117.647	357.936	125.821	112.941
CG11686	2147.62	3738.1	3895.24	251.208	400.966	381.643	185.714	214.286	209.524	3260.32	344.606	203.175
CG11693	6.28931	4.19287	8.38574	0	0	0	0	1.02881	0	6.28931	0	0.342937
CG11697	0	1.38889	0	0	0	0	0	1.287	0	0.462963	0	0.429
CG11699	1390.41	1885.84	1817.35	604.598	903.448	1041.38	648.402	470.32	447.489	1697.87	849.809	522.07
CG11722	400.657	428.571	390.805	196.37	221.122	326.733	563.218	380.952	481.117	406.678	248.075	475.096
CG11741	134.328	74.6269	69.6517	0	10.101	10.101	0	0	4.97512	92.8689	6.734	1.65837
CG11753	760.417	1100	1135.42	358.65	400.844	569.62	658.333	525	541.667	998.612	443.038	575
CG11755	218.615	170.996	168.831	26.1438	39.2157	30.5011	175.325	106.061	132.035	186.147	31.9535	137.807
CG11760	131.991	187.919	203.579	159.91	144.144	182.432	71.5884	53.6913	67.1141	174.496	162.162	64.1313
CG11777	314.7	312.629	254.658	109.015	90.1468	98.5325	193.798	158.915	172.481	293.996	99.2314	175.065
CG11779	503.994	564.996	544.662	557.949	701.337	845.468	516.34	387.073	466.231	537.884	701.585	456.548
CG11781	979.351	1159.29	1144.54	997.024	1252.98	1318.45	1000	587.021	533.923	1094.39	1189.48	706.981
CG11786	4.5045	4.5045	1.5015	0	0	0	15.1515	9.09091	10.6061	3.5035	0	11.6162
CG11788	79.2157	69.8039	77.6471	14.1509	23.5849	19.6541	14.1176	10.9804	14.902	75.5556	19.13	13.3333
CG11796	3689.47	5939.47	7275.44	410.73	772.208	723.835	1988.6	2017.54	1946.49	5634.79	635.591	1984.21
CG11807	919.891	1228.78	1174.47	413.043	527.853	623.641	692.517	557.143	595.238	1107.71	521.512	614.966
CG11808	252.664	191.781	196.347	91.3242	77.6256	94.3683	178.788	104.545	113.636	213.597	87.7727	132.323
CG11811	718.169	746.781	815.451	340.675	372.981	458.15	252.924	220.76	191.52	760.134	390.602	221.735
CG11816	0	0	0	1.86741	0.933707	0	0	0	0	0	0.933706	0
CG11825	80	130	60	400.673	424.242	683.502	200	120	150	90	502.806	156.667
CG11835	109.015	116.981	172.746	57.5421	107.686	131.936	8.57843	6.53595	4.08497	132.914	99.0547	6.39978
CG11839	136.483	150.919	139.108	96.1792	110.672	76.4163	276.68	187.088	225.296	142.17	94.4225	229.688
CG11842	187.043	179.728	191.223	150.943	183.438	227.463	602.926	521.421	506.792	185.998	187.281	543.713
CG11857	2287.36	2883.42	2766.83	2521.45	2735.97	3064.36	1236.45	1009.85	829.228	2645.87	2773.93	1025.18
CG11858	584.615	471.795	471.795	379.845	485.788	591.731	184.615	120.513	143.59	509.402	485.788	149.573
CG11865	0	0	0	0	0	0	0	0	0	0	0	0
CG11885	226.95	274.232	326.241	311.905	328.571	309.524	87.4704	68.5579	63.8298	275.808	316.667	73.286
CG11889	29.5763	17.5859	19.984	20.2532	12.6582	28.692	19.984	20.7834	27.1783	22.3821	20.5345	22.6486
CG11906	159.306	185.594	179.811	108.491	134.696	144.13	92.4765	86.7294	99.2685	174.904	129.106	92.8248
CG11911	0	7.22022	12.0337	0	10.8696	7.24638	0	1.20337	1.20337	6.41797	6.03866	0.802247
CG11912	0	1.23001	0	0	0	0	0	0	0	0.410003	0	0
CG11920	210.291	272.931	337.808	94.1043	156.463	134.921	255.034	218.121	208.054	273.677	128.496	227.07
CG11929	0	0	0	0	0	0	3.31126	1.47167	1.10375	0	0	1.96223
CG11964	451.52	494.55	515.777	238.012	268.421	294.152	247.146	177.511	208.904	487.282	266.862	211.187
CG11966	0	0	0.563063	0.563063	0	0.563063	0.565931	0	1.69779	0.187688	0.375375	0.754574
CG11970	202.252	276.035	248.291	214.925	237.612	278.01	134.056	121.011	130.042	242.193	243.516	128.37
CG11975	687.255	800	805.882	643.068	836.775	891.839	488.235	418.627	444.118	764.379	790.561	450.327
CG11977	0	0	1.21655	0	0	2.50627	6.2422	3.74532	4.99376	0.405517	0.835423	4.99376
CG11980	1252.33	1283.05	1181.56	122.316	142.857	176.471	334.264	270.019	271.881	1238.98	147.215	292.055
CG11985	639.216	780.392	678.431	761.905	551.587	674.603	1196.08	1047.06	909.804	699.346	662.698	1050.98
CG11999	1441.36	1825.62	1870.37	2023.26	2079.07	2393.8	905.864	802.469	796.296	1712.45	2165.38	834.876
CG12003	0	0	0	0	0	0	0.750751	0	0.750751	0	0	0.500501
CG12006	418.301	538.919	550.802	320.191	395.46	447.431	290.4	251.64	267.144	502.674	387.694	269.728
CG12007	469.903	559.223	549.515	195.448	211.513	242.303	309.711	263.78	277.559	526.214	216.421	283.683
CG12016	608.875	693.498	736.842	539.732	794.634	886.481	522.936	410.805	415.902	679.738	740.282	449.881
CG12018	120.65	170.147	170.92	54.9111	85.0735	78.1129	69.4444	44.7531	75.6173	153.906	72.6992	63.2716
CG12024	429.224	495.434	514.84	357.86	455.964	506.132	204.52	160.452	154.802	479.833	439.985	173.258
CG12025	950.98	1366.67	1474.51	1390.2	1770.59	1831.37	1734.89	1358.67	1231.97	1264.05	1664.05	1441.84
CG12027	0	0	0	0	0	0	4.19287	4.19287	0	0	0	2.79525
CG12034	358.22	423.077	464.555	232.416	340.979	313.456	259.344	199.847	264.683	415.284	295.617	241.291
CG12035	0	0	1.11111	1.07527	1.07527	1.07527	0	0	0	0.37037	1.07527	0
CG12038	51.5971	81.0811	68.7961	38.5878	32.8407	41.8719	67.1581	35.217	41.769	67.1581	37.7668	48.048
CG12050	184.251	244.631	251.478	208.602	214.439	240.246	216.233	173.792	162.949	226.787	221.096	184.325
CG12056	882.695	1087.11	1061.56	453.801	647.953	812.865	261.324	220.674	211.382	1010.45	638.206	231.127
CG12057	0	0	19.7869	0	0	0	0	0	0	6.59563	0	0
CG12081	321.754	429.28	370.554	271.54	432.55	449.956	180.247	150.617	193.416	373.863	384.682	174.76
CG12090	636.442	796.848	761.442	424.752	520.052	578.051	291.913	218.277	227.701	731.577	507.618	245.964
CG12091	1776.74	2419.52	2376.95	942.708	1692.71	1841.67	379.024	321.911	299.065	2191.07	1492.36	333.333
CG12096	593.544	729.249	751.647	273.148	337.963	378.307	308.251	284.488	318.812	691.48	329.806	303.85
CG12099	2533.43	3307.91	3268.83	1836.8	2284.79	2787.79	1224.69	1152.1	1205.27	3036.72	2303.13	1194.02
CG12104	480	618.667	677.333	313.492	452.381	429.894	133.047	110.157	85.8369	592	398.589	109.68
CG12106	94.7867	159.558	162.717	193.651	236.508	266.667	173.016	142.857	93.6508	139.021	232.275	136.508
CG12107	1535.8	1565.43	1587.65	967.662	808.458	940.299	1269.14	918.519	920.988	1562.96	905.473	1036.22
CG12111	3.5461	7.0922	7.0922	24.9554	10.6952	10.6952	8.77193	14.0351	7.01754	5.91017	15.4486	9.94152
CG12115	5.06971	5.06971	3.80228	0	0	0	0	0	1.27226	4.64723	0	0.424087
CG12116	1528.69	2257.63	2333.33	357.843	291.667	289.216	158.73	64.7131	59.8291	2039.88	312.909	94.4241
CG12118	811.033	910.798	910.798	579.394	918.788	1098.18	207.729	153.382	165.459	877.543	865.454	175.523
CG12121	1215.45	1543.36	1507.68	1557.97	1803.89	1966.94	785.165	643.148	664.405	1422.16	1776.27	697.573
CG12123	247.706	308.869	337.92	129.032	224.27	190.476	91.7431	68.8073	77.9817	298.165	181.259	79.5107
CG12125	254.603	434.921	420.952	175.641	290.385	316.667	136.882	128.644	116.603	370.159	260.898	127.376
CG12126	0	0	0	0	0	0	0	0	0	0	0	0
CG12128	301.031	373.196	356.014	422.356	488.621	515.395	128.898	116.424	124.047	343.414	475.457	123.123
CG12134	220.6	284.672	291.16	49.5935	61.7886	61.7886	115.977	81.103	79.4809	265.477	57.7236	92.187
CG12147	0	0	0.698812	0	0	0	0	0	0	0.232937	0	0
CG12155	321.321	451.652	383.183	252.106	334.537	387.485	127.838	112.306	114.695	385.385	324.709	118.28
CG12158	357279	253087	158169	48883.6	57412.7	76756.6	92074.1	56740.7	58301.6	256178	61017.6	69038.8
CG12159	481.848	681.518	577.558	270.142	263.823	388.626	53.8117	49.3274	43.3483	580.308	307.53	48.8291
CG12162	704.878	943.089	992.683	636.512	872.046	990.22	413.58	370.37	364.969	880.217	832.926	382.973
CG12164	0	8.10537	5.06586	0	0	0	0	0	0	4.39041	0	0
CG12179	38.8301	52.9501	66.818	6.80272	8.81834	13.8574	27.9898	24.173	28.2443	52.8661	9.82615	26.8024
CG1218	276.912	339.272	336.303	170.387	259.673	281.25	233.708	180.524	197.753	317.496	237.103	203.995
CG12182	36.9837	53.3141	46.1095	41.543	71.2166	68.7438	141.618	128.613	120.906	45.4691	60.5011	130.379
CG12194	270.79	402.749	345.017	151.515	171.044	235.017	52.2337	38.488	31.6151	339.519	185.859	40.7789
CG12203	3526.41	5650.27	5724.95	2726.13	3335.14	3962.16	2304.66	1620.07	1627.24	4967.21	3341.14	1850.66
CG12207	1974.5	2965.39	2641.17	2056.31	3135.33	3342.42	1903.28	1449.91	1646.8	2527.02	2844.69	1666.66
CG12209	0	2.33918	8.18713	0	1.15741	0	1.16144	1.16144	0	3.50877	0.385803	0.774293
CG12219	315.54	407.473	412.811	138.686	212.287	225.669	74.2787	96.3781	76.7342	378.608	192.214	82.4637
CG12229	0	0.583771	0.583771	101.868	117.714	113.752	0	0.583771	1.16754	0.389181	111.111	0.58377
CG12231	0	0	0	0	0	0	0	0	0	0	0	0
CG12237	655.773	977.124	969.499	861.111	1304.44	1510	522.702	447.398	469.546	867.465	1225.18	479.882
CG12253	39.6825	68.7831	85.5379	64.7163	46.9858	70.0355	260.831	189.213	201.592	64.6678	60.5792	217.212
CG12262	7278.44	8902.94	9003.98	5240.03	6114.04	6727.27	7116.15	6023.07	5353.22	8395.12	6027.11	6164.15
CG12267	121.328	184.547	174.33	42.9487	76.9231	86.5385	277.139	209.451	229.885	160.068	68.8034	238.825
CG1227	379.167	446.875	412.5	7.32218	4.1841	3.13808	376.31	318.658	253.669	412.847	4.88145	316.212
CG12272	296.11	429.051	396.865	137.009	183.514	192.704	209.732	173.658	189.038	374.009	171.076	190.809
CG12290	1423.98	2097.74	1891.81	273.251	293.416	332.099	203.131	164.4	120.313	1804.51	299.589	162.615
CG12307	3.663	0	0	0	0	3.52734	0	0	0	1.221	1.17578	0
CG12321	1515.52	1788.12	1732.79	1120.6	1383.47	1479.67	963.563	821.862	819.163	1678.81	1327.91	868.196
CG12325	119.073	158.764	166.491	71.4537	82.7174	93.629	152.441	150.334	143.309	148.109	82.6	148.695
CG1233	454.384	555.949	499.262	403.197	550.326	635.287	260.499	213.803	206.755	503.198	529.603	227.019
CG12333	329.911	429.158	420.26	154.321	187.243	234.568	115.674	88.2957	92.4025	393.11	192.044	98.7907
CG12338	539.303	579.104	570.149	110.778	113.772	180.639	99.5025	84.5771	90.5473	562.852	135.063	91.5423
CG1234	244.12	293.187	300.892	159.66	152.385	167.745	334.142	321.197	317.961	279.4	159.93	324.433
CG12341	348.958	369.792	489.583	359.58	375.328	440.945	289.062	200.521	174.479	402.778	391.951	221.354
CG12343	834.808	1030.97	948.378	299.259	265.185	303.704	390.855	289.086	290.56	938.052	289.383	323.5
CG12360	800.752	932.957	954.887	767.734	966.102	1151.29	1053.88	910.401	811.404	896.199	961.709	925.228
CG12362	0	1.95695	1.30463	0	0	0	0	0	0	1.08719	0	0
CG12374	20.5371	248.025	17.3776	0	4.71698	23.5849	0	0	0	95.3132	9.43396	0
CG12375	1856.16	2002.28	1944.06	978.236	950.745	1114.55	876.712	695.205	650.685	1934.17	1014.51	740.867
CG12379	105.364	151.341	107.28	102.119	115.607	157.996	241.379	180.077	204.981	121.328	125.241	208.812
CG1239	163.333	146.667	184.444	76.412	114.064	136.213	174.757	128.371	126.214	164.815	108.896	143.114
CG12391	475.866	526.405	559.341	341.203	356.38	427.206	250.842	179.574	175.084	520.537	374.93	201.833
CG12395	0	0	0	0	0	0	0	0	0	0	0	0
CG12400	3862.07	4298.85	4034.48	2086.96	2626.09	3031.88	1844.83	1344.83	1201.15	4065.13	2581.64	1463.6
CG12404	1006.31	1684.34	1409.09	1348.54	1404.31	1745.25	1089.65	930.556	929.293	1366.58	1499.37	983.166
CG12426	0	0	0	2.03252	0	4.06504	0	0	0	0	2.03252	0
CG12438	0	2.76625	0	0	0	1.38889	0	0	0	0.922083	0.462963	0
CG12439	0	0	0	0	0	0	0	0	0	0	0	0
CG12446	0	0	0	0	0	0	0	0.475511	0	0	0	0.158504
CG12448	34.0909	57.7652	43.5606	0	1.89934	0	0	0	0	45.1389	0.633113	0
CG1246	22.8833	21.3577	16.0183	6.06061	9.09091	15.1515	9.84848	7.57576	10.6061	20.0864	10.101	9.34345
CG12464	0	0	0	0	0	2.75482	0	0	0	0	0.918273	0
CG12470	15.3846	11.9658	15.3846	0	0	6.76819	1.67504	1.67504	0	14.245	2.25606	1.11669
CG12479	0	0	0	0	0	0	0	0	0	0	0	0
CG12496	0	0.944287	0.944287	0	0	0	0	0	0	0.629525	0	0
CG12498	2.55428	1.27714	0	0	0	1.26263	0	0	0	1.27714	0.420877	0
CG12507	199.561	277.412	216.009	43.4783	20.0669	32.33	0	3.34448	1.11483	230.994	31.9584	1.48644
CG12511	0	0	0	0	0	0	0	0	0	0	0	0
CG12512	902.754	966.273	937.605	399.663	738.055	824.058	1699.78	1294.61	1404.04	935.544	653.925	1466.14
CG12516	0	0	0	0	0	0	0	0	0	0	0	0
CG12517	0	0	0	0	0	9.59233	0	0	2.38095	0	3.19744	0.79365
CG12531	36.1248	65.6814	46.3875	29.9303	35.6704	41.0004	26.9939	13.4969	14.3149	49.3979	35.5337	18.2686
CG12540	0	0	0	0	0	0	0	0	0	0	0	0
CG12541	107.731	87.4525	91.2548	223.129	258.503	317.007	45.977	33.2056	40.8685	95.4794	266.213	40.017
CG12576	2221.32	3372.18	3188.8	1635.3	2238.35	2677.42	898.473	833.783	856.244	2927.43	2183.69	862.833
CG12589	0	0	0	0	0	0	0	0	0	0	0	0
CG12590	0	1.001	1.001	0	0	0	0	0	0	0.667333	0	0
CG12608	532.731	643.341	589.917	92.7602	118.401	128.205	94.7054	43.997	58.9113	588.663	113.122	65.8712
CG12609	0	0	0	0	0	0	0	0	0	0	0	0
CG12617	0	0	0	0	0	0	0	0	0	0	0	0
CG12620	0	0	0	0	0	1.16959	0	0	0	0	0.389863	0
CG12637	0	0	0	0	0	0	0	0	0	0	0	0
CG12643	108.225	134.199	190.476	13.1579	13.1579	21.9298	24.0964	12.0482	4.01606	144.3	16.0819	13.3869
CG12645	0	0	1.61812	5.26316	7.01754	10.5263	28.0702	26.3158	10.5263	0.539373	7.60233	21.6374
CG1265	377.074	470.588	505.279	295.455	381.818	472.727	173.454	114.63	85.9729	450.98	383.333	124.686
CG12655	1281.72	1989.25	1726.88	1284.19	967.949	1361.11	518.047	447.983	282.378	1665.95	1204.42	416.136
CG12659	63.6364	36.3636	45.4545	113.889	72.2222	116.667	172.727	145.455	112.121	48.4848	100.926	143.434
CG12661	0	0	0	0	0	0	0	0	0	0	0	0
CG12674	0	0	0	0	0	0	0	0	0	0	0	0
CG12679	5.26316	0	0	0	0	1.76367	0	0	0	1.75439	0.58789	0
CG12680	0	0	1.55039	1.60256	0	0	0	0	0	0.516797	0.534187	0
CG12682	0	0	0	0	0	0	0	0	0	0	0	0
CG12689	73.8739	91.8919	100.901	15	13.3333	15	0	1.72712	1.72712	88.8889	14.4444	1.15141
CG12698	2.29885	0.574713	0.574713	0	0	0	0	0	0	1.14943	0	0
CG12699	0	0	0	0	0	2.31481	0	4.5045	0	0	0.771603	1.5015
CG12702	10.3448	12.6437	28.7356	4.98657	6.52091	8.8224	27.6817	24.6059	27.2972	17.2414	6.77663	26.5283
CG12708	2.46914	3.29218	20.5761	0.854701	0.854701	0.854701	0	0	0	8.77914	0.854701	0
CG12713	65.8561	61.8034	60.7903	59.4159	74.5217	84.5921	98.9247	46.2366	66.6667	62.8166	72.8432	70.6093
CG12716	0	9.56938	15.949	0	0	0	0	0	0	8.50613	0	0
CG12721	0	5.81395	7.75194	0	1.8622	1.8622	7.40741	7.40741	12.963	4.52196	1.24147	9.25927
CG12729	0	0	0	0	0	0	0	0	0	0	0	0
CG1273	3.13927	0.856164	0.856164	27.1878	42.7641	39.3656	288.604	236.467	206.268	1.6172	36.4392	243.78
CG12730	1191.44	2279.28	1939.19	535.632	836.782	981.609	385.845	333.333	321.918	1803.3	784.674	347.032
CG12736	639.62	727.339	629.386	290.842	415.385	405.128	141.082	107.456	104.532	665.448	370.452	117.69
CG12744	52.0833	43.75	70.8333	31.25	56.25	52.0833	18.2927	8.13008	10.1626	55.5555	46.5278	12.1951
CG12746	1570.25	1885.22	1798.9	1611.73	1866.85	1958.1	892.293	760.446	806.871	1751.46	1812.23	819.87
CG12768	30.303	37.296	29.526	30.445	40.5933	52.3029	34.188	16.317	37.296	32.375	41.1137	29.267
CG12773	710.206	959.27	926.966	679.775	841.292	958.801	240.559	223.776	186.946	865.481	826.623	217.094
CG12782	0	0	0	0	0	0	0	0	0	0	0	0
CG12795	429.513	509.881	516.469	290.532	306.096	351.492	255.512	230.869	229.572	485.288	316.04	238.651
CG12796	1.79695	0.898473	0	0	0	0	0	0	0	0.898474	0	0
CG12811	1110.02	1426.93	1310.34	1740.56	1748.77	2039.41	740.196	612.745	565.359	1282.43	1842.91	639.433
CG12818	130.787	144.676	159.722	165.533	151.927	172.336	125.28	91.7226	105.145	145.062	163.265	107.383
CG12825	39.3519	67.1296	67.1296	1634.03	2123.54	2265.73	432.87	384.259	456.019	57.8704	2007.77	424.383
CG12826	0	0	0	1376	1040	912	0	0	0	0	1109.33	0
CG12828	0	0	0	0	0	0	0	0	0	0	0	0
CG12831	0	1.287	0	0	0	0	0	0	0	0.429	0	0
CG12848	1338.89	1361.11	1300	324.93	378.151	456.583	655.556	483.333	416.667	1333.33	386.555	518.519
CG12849	0	0	0	0	0	0	2.05761	0	0	0	0	0.68587
CG12858	172.791	246.719	225.284	106.14	123.246	146.491	67.9825	69.7368	60.9649	214.931	125.292	66.2281
CG12859	2398.23	2719.76	2507.37	1416.67	1943.45	2434.52	1893.81	1430.68	1513.27	2541.79	1931.55	1612.59
CG12861	0	1.3947	0	0	0	6.9735	0	0	0	0.4649	2.3245	0
CG12863	94.5843	122.807	124.333	35.9327	48.9297	42.0489	110.856	121.56	86.3914	113.908	42.3038	106.269
CG12866	0.778816	0	0	0	0	0	0	0	0	0.259605	0	0
CG12869	65.6934	88.5645	76.8856	141.813	135.965	154.483	165.491	140.574	137.753	77.0478	144.087	147.939
CG12880	7.07071	10.101	8.08081	1.94932	2.92398	29.2398	0	0.980392	0	8.41751	11.371	0.326797
CG12895	1267.09	1224.36	1192.31	215.054	217.204	200	1113.25	788.462	880.342	1227.92	210.753	927.351
CG12909	172.005	196.916	228.944	32.992	54.6075	52.3322	97.1751	82.4859	111.864	199.288	46.6439	97.175
CG1291	584.906	738.208	672.17	1296.3	1667.45	1792.75	364.78	329.403	337.264	665.095	1585.5	343.816
CG12913	22.8395	26.5432	23.4568	12.987	12.3686	9.89487	24.0741	22.8395	25.9259	24.2798	11.7502	24.2798
CG12914	0	0	0	0	0	0	0	0	0	0	0	0
CG12920	0	0	0	0	0	0	0	0	0	0	0	0
CG12926	349.308	275.825	334.398	308.761	295.94	301.282	493.078	397.231	385.517	319.844	301.994	425.275
CG12929	408.451	377.934	298.122	144.208	125.296	132.388	309.711	162.73	170.604	361.502	133.964	214.348
CG12935	184.704	230.88	259.74	63.7681	94.2029	88.4058	247.126	162.356	168.103	225.108	82.1256	192.528
CG12948	458.995	550.265	530.423	176.923	160.256	192.308	208.955	180.348	154.229	513.228	176.496	181.177
CG12963	0	5.26316	5.26316	0	8.88099	7.1048	0	1.73611	0	3.50877	5.3286	0.578703
CG12975	244.624	322.581	287.634	184.282	219.512	230.352	349.462	247.312	295.699	284.946	211.382	297.491
CG12984	1.7094	0	1.7094	0	1.65017	0	0	0	0	1.1396	0.550057	0
CG12985	24.3243	28.8288	29.7297	5.18135	3.45423	4.31779	0	0	0	27.6276	4.31779	0
CG12986	0	0	0	0	0	5.12821	2.60417	7.8125	5.20833	0	1.7094	5.20833
CG12995	0	0	1.92678	0	0	0	0	0	0	0.64226	0	0
CG13000	0	0	0	0	0	0	0	0	0	0	0	0
CG13004	46.4345	94.5274	86.2355	90.312	113.3	108.374	163.366	128.713	82.5083	75.7325	103.995	124.862
CG13005	115.972	120.139	159.722	37.037	55.5556	42.0228	22.0327	25.5864	21.322	131.944	44.8718	22.9804
CG13010	2.48756	2.48756	9.95025	2.52525	10.101	7.57576	0	0	0	4.97512	6.734	0
CG13012	121.447	183.463	248.062	598.958	791.667	940.104	196.382	193.798	113.695	184.324	776.91	167.958
CG13014	409.483	573.276	522.989	309.22	483.688	548.936	127.874	122.126	110.632	501.916	447.281	120.211
CG13016	209.18	250.564	278.405	137.255	173.454	168.175	105.342	104.59	120.391	246.05	159.628	110.108
CG13018	240.506	379.747	274.262	111.111	132.479	153.846	333.333	215.19	198.312	298.172	132.479	248.945
CG13024	628.369	743.262	770.213	607.192	936.376	984.786	849.727	685.792	616.12	713.948	842.785	717.213
CG13026	2.82486	2.82486	5.64972	11.396	11.396	5.69801	0	2.97619	0	3.76648	9.49667	0.992063
CG13028	0	1.8018	1.8018	0	0	1.84162	3.663	1.8315	0	1.2012	0.613873	1.8315
CG13029	0	2.31481	0	0	3.44828	3.44828	12.4717	7.93651	7.93651	0.771603	2.29885	9.44824
CG13033	0	0	0	0	0	0	0	0	0	0	0	0
CG13041	0	0	0	0	2.45098	4.90196	0	0	0	0	2.45098	0
CG13045	0	0	0	0	0	0	0	0	0	0	0	0
CG13046	0	0	0	0	0	0	14.4928	9.05797	1.81159	0	0	8.45412
CG13054	0	0	0	0	0	0	0	1.05152	2.10305	0	0	1.05152
CG13055	0	1.07875	0	1.04493	3.1348	3.1348	5.12821	11.2821	6.15385	0.359583	2.43818	7.52139
CG13063	0	0	0	0	0	0	0	0	0	0	0	0
CG13064	0	0	0	0	0	0	0	0	0	0	0	0
CG13069	0	0	3.43643	0	0	0	0	0	0	1.14548	0	0
CG1307	1043.01	1396.06	1367.38	1265.23	1784.95	1806.45	372.549	315.508	319.073	1268.82	1618.88	335.71
CG13071	0	0	0	0	0	0	0	0	0	0	0	0
CG13081	0	0	0	0	0	3.78788	0	0	0	0	1.26263	0
CG13082	3.53669	3.53669	7.07339	5.33333	7.11111	4.44444	8.88889	10.6667	7.11111	4.71559	5.62963	8.8889
CG13083	0	20.0422	61.1814	0	0	7.50268	0	1.04822	0	27.0745	2.50089	0.349407
CG13088	79.8005	118.038	121.363	29.5567	37.7668	55.0082	68.1445	59.1133	55.8292	106.401	40.7772	61.029
CG1309	2317.43	2788.17	2582.06	2144.68	2351.82	2560.87	1039.44	812.341	873.41	2562.55	2352.46	908.397
CG13090	194.26	220.751	203.091	766.224	891.593	1030.24	801.051	602.853	611.111	206.034	896.019	671.672
CG13097	202.417	210.473	209.97	63.4196	54.2872	73.5667	116.208	106.524	98.8787	207.62	63.7578	107.204
CG13101	901.468	1732.7	1516.77	1577.08	3127.08	4111.46	790.239	712.357	608.515	1383.65	2938.54	703.704
CG13108	4.29185	2.86123	15.7368	41.4747	46.0829	41.4747	12.605	4.20168	8.40336	7.62996	43.0108	8.40335
CG1311	889.532	1193.92	1055.48	969.741	1206.05	1365.51	1153.48	907.914	901.199	1046.31	1180.43	987.531
CG13110	0	0	0	0	0	0	0	0	0	0	0	0
CG13116	724.083	791.069	786.284	541.667	532.051	581.731	601.276	427.432	401.914	767.145	551.816	476.874
CG13117	442.424	778.788	721.212	459.459	423.423	549.55	74.4048	80.3571	44.6429	647.475	477.477	66.4683
CG13126	124.55	157.667	148.308	25.641	27.0655	28.49	46.1976	32.6937	45.4869	143.508	27.0655	41.4594
CG13127	0.454133	1.3624	0.908265	0	0	0	0	0	0	0.908266	0	0
CG13133	79.8771	110.599	93.702	33.3333	19.697	36.3636	10.5581	7.54148	7.54148	94.726	29.798	8.54702
CG13148	4.5045	3.6036	0.900901	0	1.81653	0.908265	3.62319	2.71739	5.43478	3.003	0.908265	3.92512
CG13151	127.483	127.483	118.102	61.157	115.152	111.295	80.308	78.1078	86.3586	124.356	95.868	81.5915
CG13154	0	0	1.35501	0	0	0	2.77778	0	0	0.45167	0	0.925927
CG13157	0	0	0	0	0	0	0	0	0	0	0	0
CG13168	0.925926	1.85185	0.925926	0	0	0.928505	0	0	0	1.23457	0.309502	0
CG13170	0	0	2.849	0	0	0	0	0	0	0.949667	0	0
CG13171	0	0	0	0	0	0	0	0	0	0	0	0
CG13177	7.40741	7.40741	14.8148	48.6891	37.4532	29.9625	0	0	0	9.87654	38.7016	0
CG13183	3.86698	3.09358	5.41377	1.53257	4.5977	3.06513	7.71605	10.0309	10.0309	4.12478	3.06513	9.25928
CG13185	85.1128	118.289	117.626	40.6475	57.2567	68.8531	75.8592	62.7529	51.519	107.009	55.5858	63.377
CG13186	0	0	0	0	2.331	2.331	0	0	0	0	1.554	0
CG1319	1142.54	1313.6	1322.37	1030.91	1154.53	1172.19	666.667	550.439	524.123	1259.5	1119.21	580.41
CG13192	312.693	403.509	365.325	72.4638	110.766	108.696	100.103	74.3034	68.1115	360.509	97.3086	80.8393
CG13193	0	5.29101	0	0	0	0	0	0	0	1.76367	0	0
CG13204	149.311	151.515	150.964	52.9187	73.1042	63.8298	38.671	33.7691	27.2331	150.597	63.2842	33.2244
CG13215	5.74713	2.87356	5.74713	257.971	171.014	200	117.816	74.7126	158.046	4.78927	209.662	116.858
CG13216	0	0	0	0	0	0	0	0	0	0	0	0
CG13220	1594.77	1882.35	1779.96	1138.16	1140.35	1274.12	1488.02	1076.25	1161.22	1752.36	1184.21	1241.83
CG13228	0	0	0	0	0	0	0	0	0	0	0	0
CG13229	61.9968	81.3205	64.4122	78.2889	116.223	96.8523	28.1804	16.1031	21.7391	69.2432	97.1214	22.0075
CG13230	0	0	0	0	0	0	0	0	0	0	0	0
CG13231	3.33333	3.33333	0	0	3.30033	0	0	0	0	2.22222	1.10011	0
CG13239	10.9649	4.38596	4.38596	0	0	0	0	0	0	6.57894	0	0
CG1324	0	0	0	0	0	4.662	0	0	0	0	1.554	0
CG13244	0	3.26797	0	0	0	0	0	2.63158	0	1.08932	0	0.877193
CG13247	23.9521	12.9741	22.9541	0	1.02564	1.02564	0.960615	0.960615	0.960615	19.9601	0.68376	0.960615
CG13248	125.062	153.463	158.445	31.0433	37.659	34.6056	28.4006	21.9233	22.4215	145.657	34.436	24.2485
CG13255	303.483	517.413	378.109	694.444	699.074	731.481	495.726	397.436	414.53	399.668	708.333	435.897
CG13258	6.53595	3.26797	11.4379	4.90196	9.80392	13.0719	0	0	0	7.08061	9.25926	0
CG13272	0	0	0	0	0	0	0.795545	1.19332	0	0	0	0.662955
CG13282	5.50964	6.88705	5.50964	6.25	7.63889	11.1111	0	0.695894	0.695894	5.96878	8.33333	0.463929
CG13285	107.744	153.199	138.047	548.223	495.77	658.206	387.521	285.714	374.384	132.997	567.4	349.206
CG13293	30.0501	53.9789	41.1797	32.6026	30.3541	32.0405	19.4769	12.7991	15.025	41.7362	31.6657	15.767
CG13295	392.44	498.969	490.034	296.907	367.01	421.993	441.015	408.093	397.119	460.481	361.97	415.409
CG13296	0	0	0	0.723066	0	0	26.2009	17.4672	13.8282	0	0.241022	19.1654
CG13297	0	6.89655	6.89655	9.80392	19.6078	19.6078	36.4964	12.1655	7.29927	4.5977	16.3398	18.6537
CG13298	1561.98	1628.1	1658.4	922.222	1052.78	1250	1512.4	1190.08	1192.84	1616.16	1075	1298.44
CG13305	0	0	0	0	0	0	0	0	0	0	0	0
CG13306	39.0071	31.9149	78.0142	29.703	23.1023	39.604	3.5461	3.5461	0	49.6454	30.8031	2.36407
CG13309	0	0	0	0	0	1.44928	0	0	0	0	0.483093	0
CG13310	17.4564	10.8063	4.15628	27.5	14.1667	37.5	2.49377	4.98753	7.4813	10.8063	26.3889	4.98753
CG13311	0	0	0	0	0	2.1645	0	0	0	0	0.7215	0
CG13312	0	0	0.974659	0	0	0	0	0	0	0.324886	0	0
CG13313	4.01606	3.21285	4.81928	0	0	0.791766	0.788022	0	0.788022	4.01606	0.263922	0.525348
CG13314	2.6455	7.93651	10.582	5.33333	2.66667	0	2.6455	0	0	7.05467	2.66667	0.881833
CG13315	1159.42	966.184	1439.61	265.7	265.7	516.908	347.619	71.4286	109.524	1188.4	349.436	176.191
CG13318	183.539	182.716	202.469	860.77	915.643	1006.55	267.974	227.124	236.928	189.575	927.654	244.009
CG13321	0	16.317	2.331	1.16959	4.67836	8.18713	0	0	0	6.216	4.67836	0
CG13323	2.97619	23.8095	5.95238	0	3.003	3.003	0	0	0	10.9127	2.002	0
CG13326	0.768935	0	0	0	0	0	0	0	0	0.256312	0	0
CG13330	0	0.545554	0.545554	0.543774	0	0	0	0	0	0.363703	0.181258	0
CG13332	633.57	848.7	992.908	19.6078	17.1569	26.9608	171.296	192.13	113.426	825.059	21.2418	158.951
CG13334	0	0.923361	0.923361	0	0	3.71402	0	0	0	0.615574	1.23801	0
CG13339	585.526	614.035	614.035	331.126	300.221	386.313	1097.13	841.06	807.947	604.532	339.22	915.379
CG13344	122.995	150.624	182.709	157.658	183.784	197.297	94.2029	82.4275	88.7681	152.109	179.58	88.4662
CG13358	2.21484	0	1.10742	4.37158	4.37158	2.18579	2.25225	2.25225	3.37838	1.10742	3.64298	2.62763
CG13360	203.484	248.614	342.043	96.8254	78.5714	107.143	22.1694	19.0024	15.8353	264.714	94.1799	19.0024
CG13361	2.09205	0	2.09205	0	0.672043	0	0	0	0	1.3947	0.224014	0
CG13362	0	0	4.14079	0	1.08578	0	9.6463	4.28725	3.21543	1.38026	0.361927	5.71633
CG13365	722.222	961.988	909.357	362.832	471.976	536.873	280.702	213.45	152.047	864.522	457.227	215.4
CG13367	385.621	450.163	455.882	95.0156	106.698	107.477	48.3997	56.2061	50.7416	430.555	103.064	51.7825
CG13369	983.553	1325.66	1275.22	413.115	645.902	727.869	326.819	281.216	276.873	1194.81	595.629	294.969
CG13373	182.674	274.953	250.471	98.6965	87.5233	108.007	101.124	88.015	84.2697	236.033	98.0756	91.1362
CG13375	17.4292	34.8584	40.305	15.9744	6.38978	17.0394	16.9851	10.6157	11.6773	30.8642	13.1345	13.0927
CG13377	2462.63	3586.87	3626.26	1074.75	1553.54	2363.64	224.242	181.818	185.859	3225.25	1663.98	197.306
CG1339	3.1746	3.96825	4.7619	0.795545	2.38663	0.795545	17.4603	11.1111	7.93651	3.96825	1.32591	12.1693
CG13390	219.598	232.721	199.475	39.4737	38.5965	57.0175	94.5017	68.7285	69.5876	217.265	45.0292	77.6059
CG13392	372.197	334.828	339.312	156.156	267.267	271.772	74.7384	58.296	52.3169	348.779	231.732	61.7838
CG13397	440.017	441.302	484.147	3.87097	9.89247	7.31183	6.42674	4.71294	7.28363	455.155	7.02509	6.1411
CG13398	144.796	201.357	178.733	99.3228	165.538	158.766	116.366	105.856	103.604	174.962	141.209	108.609
CG13403	0	16.8776	6.32911	0	0	0	0	0	0	7.73557	0	0
CG13405	1.75439	0	0	0	1.72712	6.90846	20.1005	11.7253	16.7504	0.584797	2.87853	16.1921
CG13408	22.0493	23.3463	24.6433	1.26743	5.06971	8.87199	1.27226	3.81679	0	23.3463	5.06971	1.69635
CG13409	81.0481	120.658	110.299	68.3761	79.9756	98.9011	42.0475	35.3443	40.2194	104.002	82.4176	39.2037
CG13426	22.2222	60.3175	28.5714	3.20513	0	0	0	0	0	37.037	1.06838	0
CG13436	8.68056	4.62963	6.94444	5.7971	1.15942	3.47826	23.108	24.8411	24.8411	6.75154	3.47826	24.2634
CG13437	163.311	250.559	217.002	73.0594	105.023	73.0594	129.754	118.568	147.651	210.291	83.7139	131.991
CG13443	0	0	0	0	0	0	0	0	0	0	0	0
CG13445	0	0	0	0	3.87597	0	0	0	0	0	1.29199	0
CG13454	0	0	0	6.06061	3.0303	3.0303	6.17284	12.3457	3.08642	0	4.0404	7.20165
CG13458	21.5563	34.7003	50.4732	1.02881	1.02881	2.05761	4.21941	3.16456	2.63713	35.5766	1.37174	3.34037
CG13465	0	0	0	0	0	0	0	4.21941	0	0	0	1.40647
CG13473	0	2.39808	4.79616	7.35294	2.45098	4.90196	4.90196	7.35294	0	2.39808	4.90196	4.08497
CG13477	0	5.89971	0	0	0	0	0	0	0	1.96657	0	0
CG13484	271.523	278.146	293.598	138.158	120.614	138.158	126.362	89.3246	84.9673	281.089	132.31	100.218
CG13488	21.0526	12.2807	8.77193	0	0	0	0	0	0	14.0351	0	0
CG13500	0.825083	0	0.825083	0	0	0	0	0	0.825083	0.550055	0	0.275028
CG13501	0	0	0	0	0	0	0	0	0	0	0	0
CG13506	863.486	1133.86	1266.4	948.925	1209.68	1502.69	160.667	146	123.333	1087.92	1220.43	143.333
CG13510	260.982	317.829	341.085	190.104	109.375	161.458	2751.37	2087.43	1912.57	306.632	153.646	2250.46
CG13516	757.937	857.143	851.19	778.455	835.366	981.707	436.364	349.495	325.253	822.09	865.176	370.371
CG13526	0	0	0	0	0	2.17865	0	0	0	0	0.726217	0
CG13531	277.686	400.184	381.818	346.196	450.202	521.316	468.687	417.998	416.345	353.229	439.238	434.343
CG13532	87.4525	106.464	91.2548	104.326	129.771	148.855	39.2902	21.5463	30.4183	95.0571	127.651	30.4183
CG13538	5.26316	1.75439	5.26316	0	0	0	0	0	0	4.09357	0	0
CG13539	0	0	0	0	0	0	0	0	0	0	0	0
CG13541	0	0	0	0	0	0	0	0	0	0	0	0
CG13544	3.63306	0	0	0	0	0.933707	0	0	0	1.21102	0.311236	0
CG13557	0	0	0	0	0	0	0	0	0	0	0	0
CG13558	0	0	0	0	0	0	0	0	0	0	0	0
CG13559	5.84795	2.92398	11.6959	2.92398	5.84795	2.92398	12.1212	0	0	6.82261	3.89864	4.0404
CG13563	10.8755	13.0506	12.5068	6.12131	6.12131	7.23428	0.547345	0	0	12.1443	6.4923	0.182448
CG13564	0	0	0	0	0	0	0	0	0	0	0	0
CG13565	2.50627	10.0251	10.0251	0	0	2.45098	0	2.43309	0	7.51882	0.816993	0.81103
CG13566	3.30033	6.60066	4.9505	3.56506	8.91266	10.6952	3.25203	0	0	4.9505	7.72431	1.08401
CG13575	50.5438	92.1305	88.2917	19.2678	19.9101	17.341	4.48718	1.28205	1.28205	76.9887	18.8396	2.35043
CG13578	2073.56	2400	2287.36	755.051	679.293	744.949	819.549	714.286	759.398	2253.64	726.431	764.411
CG1358	36.6528	47.7178	59.4744	210.856	184.412	227.557	24.255	31.878	22.176	47.9483	207.608	26.103
CG13581	0	0	0	0	0	0	0	0	0	0	0	0
CG13585	4303.03	4884.85	4696.97	2623.85	2556.57	3250.76	5151.52	4115.15	3924.24	4628.28	2810.39	4396.97
CG13599	35.0282	38.4181	42.9379	3.43643	6.87285	16.0367	54.7945	37.6712	23.9726	38.7947	8.78199	38.8128
CG1360	86.9565	91.7874	80.9179	55.7576	67.8788	84.8485	36.3636	32.7273	43.6364	86.5539	69.495	37.5758
CG13601	552.941	691.503	657.516	281.95	277.997	359.684	221.785	152.231	183.727	633.987	306.544	185.914
CG13605	471.849	678.625	637.768	392.701	553.285	611.679	295.918	268.222	285.228	596.081	519.222	283.123
CG13607	236.874	274.115	340.659	17.094	18.9255	39.6825	17.0628	15.2346	9.75015	283.883	25.234	14.0158
CG13613	0	0	0	0	0	0	0	0	0	0	0	0
CG13622	9.52381	16.6667	14.2857	18.8457	23.5571	29.4464	20.8333	10.4167	15.0463	13.4921	23.9497	15.4321
CG13623	386.091	498.801	455.635	611.111	640.097	891.304	537.17	330.935	285.372	446.842	714.171	384.492
CG13630	685.383	851.159	759.358	318.958	382.749	443.845	365.419	299.465	306.595	765.3	381.851	323.826
CG13634	2.886	3.6075	1.443	0	0	0	0.693001	0.693001	0	2.6455	0	0.462001
CG13639	473.43	579.71	347.826	11.1111	0	11.1111	0	4.83092	4.83092	466.989	7.4074	3.22061
CG13640	42.9293	47.9798	45.4545	0	0	4.90196	0	0	0	45.4545	1.63399	0
CG13653	0	0	0	0	0	0	0	0	0	0	0	0
CG13663	860.64	894.539	824.859	797.348	776.515	971.591	931.034	701.149	683.908	860.013	848.485	772.03
CG13667	178.694	222.795	191.867	72.8629	90.0746	117.613	132.302	108.82	128.866	197.785	93.5168	123.329
CG13671	307.545	398.281	348.615	231.322	295.019	306.034	156.325	161.135	167.388	351.48	277.458	161.616
CG13676	5.66251	3.77501	5.28501	9.91609	11.4416	8.77193	7.82998	4.10142	6.33855	4.90751	10.0432	6.08998
CG13685	141.901	123.159	120.482	41.0053	43.6508	30.4233	50.4648	39.8406	35.8566	128.514	38.3598	42.054
CG13689	308.271	320.802	310.777	272.059	247.549	254.902	208.333	127.451	149.51	313.283	258.17	161.765
CG13690	0.960615	6.7243	40.3458	32.7553	42.3892	60.6936	40.3458	43.2277	41.3064	16.0102	45.2794	41.6266
CG13692	43.1779	15.544	15.544	0	5.20833	0	3.45423	3.45423	1.72712	24.7553	1.73611	2.87853
CG13704	117.647	80.8824	120.098	14.9254	9.95025	7.46269	0	2.46914	0	106.209	10.7794	0.823047
CG1371	819.294	878.232	892.688	368.67	360.601	427.101	500.556	416.528	454.647	863.405	385.457	457.244
CG13712	0	0	0	0	2.849	0	0	0	0	0	0.949667	0
CG13713	3.367	0	10.101	3.47222	6.94444	0	3.40136	0	10.2041	4.48933	3.47222	4.53515
CG13723	0	0	0	0	0	0	0	0	0	0	0	0
CG13724	0	0	0	0	0	0	0	0	0	0	0	0
CG13725	0	0	0	0	0	0	0	0	0	0	0	0
CG13728	0	0	0.442674	0	0	0	0	0	0	0.147558	0	0
CG13737	42.735	55.5556	47.0085	164.948	206.186	230.241	0	0	0	48.433	200.458	0
CG13742	108.473	121.043	180.633	2.26449	4.52899	5.43478	0	0	3.61827	136.716	4.07609	1.20609
CG13747	0	0	0	0	0	1.5083	0	0	0	0	0.502767	0
CG13748	17.6991	8.84956	5.89971	5.84795	20.4678	46.7836	14.4928	5.7971	5.7971	10.8161	24.3665	8.69567
CG13751	1372.29	1714.29	1285.71	673.611	718.75	1034.72	1283.33	729.167	866.667	1457.43	809.027	959.721
CG13759	4.38596	0	1.46199	1.46843	0	1.46843	0	0	0	1.94932	0.978953	0
CG13766	161.905	200	194.709	60.1266	95.9916	95.9916	81.4815	43.3862	76.1905	185.538	84.0366	67.0194
CG13771	0	0.739098	0	0	0	0.734214	38.1791	45.5213	37.4449	0.246366	0.244738	40.3818
CG13773	202.899	226.614	225.296	211.64	214.286	256.614	252.964	168.643	205.534	218.27	227.513	209.047
CG13786	0	0	0	0	0	0	0	0.529942	0	0	0	0.176647
CG13801	0	0	0	0	0	0.488759	0	0	0	0	0.16292	0
CG13806	0	0	0	0	0	1.12613	0	0	0	0	0.375377	0
CG13807	749.02	690.196	647.059	183.044	184.971	175.337	283.237	206.166	188.825	695.425	181.117	226.076
CG13810	3.40136	0.680272	1.36054	0	0	0	0	0	0	1.81406	0	0
CG13829	6.31912	23.6967	9.47867	0	0	1.54321	0	0	0	13.1648	0.514403	0
CG13837	0	0	0	0	0	0	0	0	0	0	0	0
CG13838	0	0	0	0	0	0	0	0	0	0	0	0
CG13841	6077.78	7197.22	5716.67	871.148	1117.65	1299.72	3225	2475	2394.44	6330.56	1096.17	2698.15
CG13843	0	2.76243	0	4.61681	6.46353	5.54017	2.76243	4.60405	4.60405	0.92081	5.54017	3.99018
CG13856	1194	1439.15	1190.48	107.774	190.813	224.382	35.0877	47.3684	57.8947	1274.54	174.323	46.7836
CG13857	0	0	0	0	0	0	0	0	0	0	0	0
CG13862	0	0	0	0	0	0	5.46448	8.19672	2.73224	0	0	5.46448
CG13865	1174.19	1456.14	1325.81	617.424	646.465	751.263	427.673	314.465	340.881	1318.71	671.717	361.006
CG13870	1.79211	3.58423	1.19474	0	0	0.584795	1.17786	1.76678	0	2.19036	0.194932	0.981547
CG13872	0	0.543774	0	0	0	0	0	0	0	0.181258	0	0
CG13875	95.3361	107.682	106.31	185.696	244.751	296.588	49.8688	45.2756	61.6798	103.109	242.345	52.2747
CG13887	4630.12	5776.32	5459.06	7044.05	8854.63	10365.6	5276.32	4361.11	4254.39	5288.5	8754.76	4630.61
CG13891	4.21941	0	4.21941	0	0	4.2735	0	0	0	2.81294	1.4245	0
CG13893	613.432	728.092	685.504	2111.98	2167.53	2285.59	940.213	837.019	837.019	675.676	2188.37	871.417
CG13895	190.381	245.157	236.473	137.333	142.667	145.333	175.649	135.063	128.41	224.004	141.778	146.374
CG13898	0	0	2.20751	0	0	0	0	2.20751	0	0.735837	0	0.735837
CG13900	864.982	1041.02	1047.54	603.317	773.246	812.126	453.953	352.622	379.516	984.514	729.563	395.364
CG13901	220.721	249.249	213.213	224.736	369.532	354.449	205.706	151.652	220.721	227.728	316.239	192.693
CG13902	309.227	330.84	321.696	118.928	153.266	175.879	42.4088	34.7752	35.6234	320.588	149.358	37.6025
CG13905	0	1.40056	0	0	0	0	0	0	0	0.466853	0	0
CG13907	562.908	988.971	807.598	1086.9	1542.23	1724.6	641.026	526.252	547.009	786.492	1451.24	571.429
CG13912	187.243	119.342	129.63	55.2147	51.1247	71.5746	8.13008	0	4.06504	145.405	59.3047	4.06504
CG13917	1014.69	1490.34	1284.63	501.226	707.046	833.252	299.393	244.302	207.903	1263.22	680.508	250.533
CG13919	437.659	450.382	409.669	374.359	333.333	394.872	389.313	338.422	320.611	432.57	367.521	349.449
CG13920	270.833	339.583	502.083	102.725	257.862	257.862	29.1667	10.4167	10.4167	370.833	206.15	16.6667
CG13924	9.44669	9.44669	7.4224	6.01202	4.67602	8.01603	10.7311	6.03622	8.71898	8.77193	6.23469	8.49543
CG13926	316.413	309.645	341.794	278.912	333.333	387.755	302.876	258.883	253.807	322.617	333.333	271.855
CG13931	1.93798	0	1.93798	0	0	0	0	0	0	1.29199	0	0
CG1394	0	3.99202	0	0	0	6.21118	0	0	0	1.33067	2.07039	0
CG13949	39.0805	32.1839	43.6782	24.1546	12.0773	4.83092	14.3885	19.1847	19.1847	38.3142	13.6876	17.586
CG13955	175.869	143.149	155.419	0	0	0	5.11247	1.02249	2.04499	158.146	0	2.72665
CG13957	174.229	213.551	203.267	231.858	271.304	300.211	159.472	120.204	127.398	197.016	267.791	135.691
CG13970	1.62602	3.25203	0	0	0	0	0	0	0	1.62602	0	0
CG13983	0	0	0	6.94444	8.33333	12.5	0	0	0	0	9.25926	0
CG13992	1.51745	2.02327	8.59889	0	7.70416	2.05444	8.63821	3.55691	8.63821	4.04654	3.25287	6.94444
CG13993	772.487	642.857	679.894	6355.19	5243.17	6666.67	2161.38	1420.63	1502.65	698.413	6088.34	1694.89
CG13994	591.002	546.012	494.888	755.274	732.068	934.599	2472.04	1861.3	1856.82	543.967	807.314	2063.39
CG13998	0	0	3.43643	0	0	0	0	0	0	1.14548	0	0
CG14000	0	0	0	0	0	0	0	0	0	0	0	0
CG14005	262.881	350.158	248.16	239.153	291.005	358.73	97.4843	74.4235	81.761	287.066	296.296	84.5563
CG14010	87.4074	128.148	128.148	42.4107	65.4762	71.4286	210.097	172.235	169.265	114.568	59.7718	183.866
CG14013	0	0	0	0	0	1.38889	1.38313	1.38313	0	0	0.462963	0.922087
CG14014	0	0	0	0	0	0	0	1.0101	0	0	0	0.3367
CG1402	3.003	5.00501	1.001	2.07039	3.10559	2.07039	0	1.001	3.003	3.003	2.41546	1.33467
CG14020	55.3936	70.9427	87.4636	26.0417	25	27.0833	34.375	22.9167	23.9583	71.2666	26.0417	27.0833
CG14022	221.122	254.125	339.934	30	33.3333	76.6667	33.0033	23.1023	13.2013	271.727	46.6667	23.1023
CG14024	23.2733	16.5165	17.2673	16.7046	10.6302	15.9453	5.30303	3.78788	3.78788	19.019	14.4267	4.29293
CG14034	8.87574	24.6548	27.6134	1.92678	3.85356	0.963391	5.78035	2.89017	5.78035	20.3813	2.24791	4.81696
CG14036	0	0	39.4265	0	14.4928	0	0	0	3.58423	13.1422	4.83093	1.19474
CG14040	291.237	462.199	411.512	337.651	376.511	375.648	429.802	365.202	363.48	388.316	363.27	386.161
CG14044	162.257	179.894	173.721	35.9231	44.2774	50.1253	92.8382	76.0389	79.5756	171.957	43.4419	82.8176
CG14050	48.906	78.5071	61.7761	3.92157	6.53595	3.92157	0	1.29199	1.29199	63.0631	4.79303	0.861327
CG14062	0	0	0	0	0	0	0	0	0	0	0	0
CG14069	0	0	0	1126.67	413.333	623.333	0	0	3.30033	0	721.112	1.10011
CG14070	0	0	0	7.32601	6.10501	7.32601	0	0	0	0	6.91901	0
CG14071	4.90196	0	0	0	0	9.87654	0	0	0	1.63399	3.29218	0
CG14072	2.75482	2.75482	0	0	0	0	0	0	0	1.83655	0	0
CG14077	0	0	0	2.27531	0	6.82594	0	0	0	0	3.03375	0
CG14089	0	0	1.4881	0	1.46199	0	0	0	0	0.496033	0.48733	0
CG1409	0	0	0	0	0	0	0	0	0	0	0	0
CG14102	119.426	131.519	144.369	49.3546	62.2627	63.7813	77.0975	55.9335	68.7831	131.771	58.4662	67.2714
CG14106	5.93472	1.97824	0.98912	3.1348	3.1348	7.31452	0	0	0	2.96736	4.52804	0
CG14107	0	0	0	0	1.34953	0	0	0	0	0	0.449843	0
CG14110	0	0	0	0	0	0	0	0	0.94697	0	0	0.315657
CG14131	58.5034	72.1088	58.0499	20.4918	25.9563	25.5009	17.0115	14.7126	16.092	62.8874	23.983	15.9387
CG14132	39.548	127.119	138.418	177.083	197.917	333.333	132.768	161.017	161.017	101.695	236.111	151.601
CG14135	264.052	369.935	329.412	141.176	155.556	147.712	121.92	86.9001	79.118	321.133	148.148	95.9794
CG14137	0	0	0	3.43643	0	3.43643	0	0	0	0	2.29095	0
CG14147	0	0	0	4.44444	2.22222	2.22222	0	0	0	0	2.96296	0
CG1416	2024.48	1903.95	2203.39	932.574	873.694	1002.85	683.664	622.285	552.408	2043.94	936.373	619.452
CG14174	175.793	183.477	197.887	14.3266	6.68577	13.3715	42.735	44.6344	28.49	185.719	11.4613	38.6198
CG1418	715.026	839.378	854.922	1045.14	1022.57	1152.78	1015.54	780.656	713.299	803.109	1073.5	836.498
CG14183	10.3211	8.02752	12.2324	3.82702	8.03674	2.29621	172.783	119.266	133.028	10.1937	4.71999	141.692
CG14184	1766.67	1748.15	1679.63	1286.78	1322.16	1471.14	1085.19	748.148	722.222	1731.48	1360.03	851.853
CG14185	3.31675	9.95025	14.0962	5.06329	16.8776	16.8776	0.833333	0.833333	1.66667	9.12107	12.9395	1.11111
CG14187	0	13.2275	31.746	0	5.60224	8.40336	8.33333	0	0	14.9912	4.66853	2.77778
CG14194	484.171	882.682	783.054	338.002	530.345	520.075	216.015	240.223	239.292	716.636	462.807	231.843
CG14195	0	0	0	0	0	0	0	0	0	0	0	0
CG14196	170	211.667	209.444	55.7395	77.8146	83.8852	26.9083	28.5557	19.2202	197.037	72.4798	24.8947
CG14212	7.63359	6.36132	6.36132	0	0	0	3.83142	2.55428	1.27714	6.78541	0	2.55428
CG14229	556.604	566.038	481.132	111.111	117.46	142.857	189.602	192.661	125.382	534.591	123.809	169.215
CG14231	95.3545	171.964	158.924	38.835	76.8608	76.0518	54.6047	37.4898	54.6047	142.081	63.9159	48.8997
CG14232	263.889	349.306	370.833	312.5	364.583	443.056	187.158	143.443	129.781	328.009	373.38	153.461
CG14244	0	0	0	0	0	0	0	0	0	0	0	0
CG14247	0	0	0	0	0	0	0	0	0	0	0	0
CG14258	33.5917	23.2558	25.8398	23.3463	15.5642	10.3761	33.5917	33.5917	32.2997	27.5624	16.4289	33.161
CG14259	17955	25791.2	23176.5	5909.94	7451.46	8777.78	20674.8	19527.3	19497.1	22307.6	7379.73	19899.7
CG14260	8.03213	0	2.67738	0	0	0	0	0	0	3.56984	0	0
CG14269	1.75439	0	0	3.50877	0	5.26316	0	0	1.75439	0.584797	2.92398	0.584797
CG1427	862.622	1136.68	1030.68	280.922	430.468	412.299	206.995	192.719	173.448	1009.99	374.563	191.054
CG14270	520.07	520.07	488.656	208.772	261.404	321.053	118.674	73.2984	69.808	509.599	263.743	87.2601
CG14273	0	0	0	0	1.30208	2.60417	0	0	0	0	1.30208	0
CG14274	0	5.34759	5.34759	26.5957	44.3262	40.7801	23.2975	25.0896	7.16846	3.56506	37.234	18.5185
CG14275	2493.24	3099.1	3069.82	353.741	548.753	682.54	675.676	500	475.225	2887.39	528.345	550.3
CG14282	7.96359	7.96359	11.3766	0	0	0	21.4689	11.2994	13.5593	9.10126	0	15.4425
CG14291	177.481	251.272	228.372	254.939	262.588	279.159	873.41	756.361	777.99	219.042	265.562	802.587
CG14292	0	1.98413	0	0	2.03252	2.03252	1.94932	0	3.89864	0.661377	1.35501	1.94932
CG14298	222.222	312.312	465.465	206.79	231.481	280.864	82.5688	55.0459	21.4067	333.333	239.712	53.0071
CG14300	0	0	0	0	0	0	0	0	0	0	0	0
CG14305	0	2.20751	1.10375	0	0	0	0	1.10375	1.10375	1.10375	0	0.735833
CG14309	0	24.8447	79.02	0	1.7307	4.49983	0	0	0	34.6216	2.07684	0
CG14312	15.4321	12.3457	9.25926	15.5763	15.5763	6.23053	21.8069	6.23053	0	12.3457	12.461	9.34581
CG14317	0	0.744048	0.744048	0	0	0	0	0	0	0.496032	0	0
CG14321	13.7741	46.832	41.3223	2.77778	8.33333	16.6667	146.006	121.212	123.967	33.9761	9.25927	130.395
CG14323	0	0	0	0	0	0	0	0	0	0	0	0
CG14326	0	0	0	0	2.43309	0	0	0	0	0	0.81103	0
CG14327	0	0	0	0	0	0	0	0	0	0	0	0
CG14329	4.42968	11.0742	8.85936	0	0	2.18579	2.20751	0	0	8.12108	0.728597	0.735837
CG14330	0	0	0	0	0	0	0	0	0	0	0	0
CG14331	23.5043	40.5983	21.3675	0	0	0	12.8205	18.1624	7.47863	28.49	0	12.8205
CG14342	2.36407	0	2.36407	0	0	2.38095	2.36407	11.8203	2.36407	1.57605	0.79365	5.51615
CG14346	0	0	0	0	0	0	0	0	0	0	0	0
CG14352	61.089	100.93	126.162	105.128	93.5897	103.846	110.256	62.8205	92.3077	96.0603	100.855	88.4614
CG14353	200	229.333	234.667	91.6442	87.1518	93.4412	45.3333	42.6667	29.3333	221.333	90.7457	39.1111
CG14362	0	1.61812	0	0	0	0	0	0	0	0.539373	0	0
CG14367	492.473	645.161	503.226	166.127	194.175	202.805	216.129	187.097	181.72	546.953	187.702	194.982
CG14369	0	0	0	0	0	0	0	0	0	0	0	0
CG14380	0	0	1.98413	0	0	0	0	0	0	0.661377	0	0
CG14383	0	0	0	0	0	0	0	0	0	0	0	0
CG14391	0	4.93827	2.46914	0	0	0	2.46914	0	0	2.46914	0	0.823047
CG14397	3.11526	0	0	0	0	0	0	0	0	1.03842	0	0
CG1440	2201.5	2935.79	2695.36	2056.81	2515.4	3006.16	1647.5	1299.79	1374.4	2610.88	2526.12	1440.56
CG14400	71.8157	75.8808	107.046	17.6152	31.1653	31.1653	1.34953	1.34953	6.74764	84.9142	26.6486	3.1489
CG14402	1.20773	0	0	0	0	1.21212	1.18203	1.18203	1.18203	0.402577	0.40404	1.18203
CG14407	1230.61	1958.07	1685.53	656.627	935.743	1170.68	436.047	354.651	379.845	1624.74	921.017	390.181
CG1441	2606.71	3087.04	3038.68	415.375	625.323	630.491	1789.81	1433.27	1532.56	2910.81	557.063	1585.21
CG14417	22.2222	17.1717	16.1616	0	0	0	0	0	0	18.5185	0	0
CG14427	0	0	0	0	0	0	0	0	0	0	0	0
CG1444	11958.5	14837	14262.7	7496.88	7336.46	8922.92	2803.74	2629.28	2610.59	13686.1	7918.75	2681.2
CG14441	454.018	698.578	680.302	370.531	496.828	570.358	239.412	180.64	146.932	610.966	479.239	188.995
CG14448	1.62602	3.25203	6.50407	0	0	1.62602	0	0	0	3.79404	0.542007	0
CG14450	247.312	242.832	229.391	225.464	291.777	351.017	448.649	380.18	418.018	239.845	289.419	415.616
CG14455	0	0	0	0	0	0	0	0	0	0	0	0
CG14464	531.609	557.471	525.862	2465.61	2060.85	3264.55	2111.11	1291.67	1166.67	538.314	2597	1523.15
CG14476	6160.89	7782.47	7042.57	5431.67	5720.54	6519.52	4460.95	3836.95	3944.69	6995.31	5890.58	4080.86
CG14478	712.24	947.266	949.87	537.613	756.161	880.026	370.809	287.968	280.736	869.792	724.6	313.171
CG14480	1022.76	1025.44	942.436	535.475	585.007	663.989	506.667	341.333	421.333	996.879	594.824	423.111
CG14482	4830.41	3327.49	2730.99	2565.48	2386.9	3315.48	5228.07	3719.3	3532.16	3629.63	2755.95	4159.84
CG14483	1186.99	1113.82	967.48	1283.33	1220.83	1462.5	1399.18	962.963	958.848	1089.43	1322.22	1107
CG14490	18.6125	10.1523	5.07614	3.6036	10.8108	7.20721	3.28407	1.64204	0	11.2803	7.2072	1.64204
CG14491	0	0	0	3.96825	0	3.96825	0	0	0	0	2.6455	0
CG14492	0	0	0	0	0	0	0	0	0	0	0	0
CG14500	5.26316	26.3158	0	1.75439	3.50877	3.50877	0	0	0	10.5263	2.92398	0
CG14502	1.77305	3.5461	3.5461	1.77305	0	1.77305	12.3457	1.76367	7.05467	2.95508	1.18203	7.05468
CG14505	30.8123	8.40336	19.6078	31.8841	17.3913	14.4928	14.3678	8.62069	2.87356	19.6078	21.2561	8.62068
CG14507	5.36193	6.25559	7.14924	1.79211	1.79211	1.79211	0.891266	0.891266	1.78253	6.25559	1.79211	1.18835
CG14508	82.3643	110.465	108.527	15.5039	11.6279	12.5969	0	0	0	100.452	13.2429	0
CG14512	282.651	307.992	239.766	254.902	284.314	290.196	423.002	300.195	294.347	276.803	276.471	339.181
CG14515	1351.19	1232.14	1837.3	3.99202	3.99202	0	1.98413	5.95238	1.98413	1473.54	2.66135	3.30688
CG14523	61.5996	95.38	84.4511	55.473	69.8366	82.7142	20.3373	21.3294	17.3611	80.4769	69.3413	19.6759
CG14535	17.3887	19.4518	18.8624	15.6758	20.1124	20.4082	7.38771	8.86525	4.72813	18.5676	18.7321	6.9937
CG14537	3.28407	0	0	0	0	1.65017	0	0	0	1.09469	0.550057	0
CG14543	374.359	321.368	393.162	103.093	104.811	104.811	255	131.667	153.333	362.963	104.238	180
CG14544	52.5762	53.6278	49.4217	21.9436	43.8871	40.7524	19.73	18.6916	29.0758	51.8752	35.5277	22.4991
CG14551	0	1.65837	0	0	0	1.66667	0	0	0	0.55279	0.555557	0
CG14561	32.646	13.7457	29.2096	20.202	38.7205	23.569	30.303	43.0622	23.9234	25.2004	27.4972	32.4295
CG14564	0	0	0	0	0	0	0	0	0	0	0	0
CG14565	2.47831	0	0	0	0	1.25786	0	0	0	0.826103	0.419287	0
CG14566	0	0	6.0241	7.88955	3.94477	0	4.01606	0	0	2.00803	3.94477	1.33869
CG14567	2917.54	3984.21	3935.09	3001.74	2232.64	2718.75	1257.73	1142.61	1018.9	3612.28	2651.04	1139.75
CG14568	7.79727	1.94932	3.89864	0	3.87597	15.5039	0	0	0	4.54841	6.45996	0
CG14569	0	0	0	0	0	0	0	0	0	0	0	0
CG14570	0	1.46199	0	0	0	0	0	0	0	0.48733	0	0
CG14572	7.7821	11.6732	33.7224	6.53595	2.61438	3.92157	0	2.63505	1.31752	17.7259	4.3573	1.31752
CG14573	0	0	1.73611	0	0	0	0	0	0	0.578703	0	0
CG14579	0	0	0	0	0	0	0	0	0	0	0	0
CG14589	29.7619	26.7857	26.7857	14.556	10.1892	0	3.01205	1.50602	3.01205	27.7778	8.2484	2.51004
CG14590	54.2495	62.0856	81.9771	116.97	169.091	204.848	12.8913	15.9607	9.82198	66.1041	163.636	12.8913
CG14598	0	0	2.91121	0	0	0	7.71605	9.25926	6.17284	0.970403	0	7.71605
CG14607	0.831255	2.49377	0	0.837521	0.837521	0.837521	0	1.64609	0	1.10834	0.837521	0.548697
CG1461	2331.34	3697.27	4648.04	125.333	292.667	320.667	80.5057	57.2189	43.9122	3558.88	246.222	60.5456
CG14613	206.086	251.729	264.177	474.198	652.72	662.483	297.222	259.722	251.389	240.664	596.467	269.444
CG14618	217.346	308.255	317.659	344.756	438.214	472.482	320.988	238.683	244.856	281.087	418.484	268.176
CG14624	0	0	0	0	0	0	0	0	0	0	0	0
CG14626	161.793	104.288	383.041	0.966184	8.69565	6.76329	101.744	74.6124	75.5814	216.374	5.47504	83.9793
CG14627	4.93827	3.7037	28.3951	0	0	0	0	1.26743	0	12.3457	0	0.422477
CG14629	1296.76	1273.77	1483.8	235.669	437.367	699.575	56.0847	15.873	32.8042	1351.44	457.537	34.9206
CG1463	133.929	129.96	144.841	24.024	27.027	52.0521	58.3581	38.5757	40.5539	136.243	34.3677	45.8292
CG14636	58.2691	80.5484	88.2605	379.068	458.223	569.041	735.573	571.059	590.87	75.6927	468.777	632.501
CG14644	0	0	0	2.29885	1.14943	2.29885	0	0	0	0	1.91571	0
CG14645	0	27.4914	3.43643	0	0	0	3.47222	3.47222	0	10.3093	0	2.31481
CG14646	535.452	683.782	634.882	605.242	755.119	793.612	673.235	586.207	590.312	618.039	717.991	616.585
CG14650	437.113	497.938	503.436	491.632	594.491	685.146	358.012	300.313	328.467	479.496	590.423	328.931
CG14651	0	0.617856	0.308928	0	0	0	0.926784	0	0	0.308928	0	0.308928
CG14657	313.063	388.138	360.36	185.268	223.958	259.673	580.741	456.296	454.074	353.854	222.966	497.037
CG14659	0	0	0	0	0	0	0	0	0	0	0	0
CG14664	0	0	3.96825	0	0	0	0	3.96825	3.96825	1.32275	0	2.6455
CG14667	305.638	311.573	300.692	232.323	269.697	291.919	234.642	193.353	189.325	305.968	264.646	205.773
CG14671	686.022	845.161	741.935	506.494	696.97	900.433	911.828	632.258	679.57	757.706	701.299	741.219
CG14676	38.2514	25.9563	24.5902	0	0	1.37741	12.3457	15.0892	27.4348	29.5993	0.459137	18.2899
CG14684	0	0	0	0	0	0	0	0	0	0	0	0
CG14687	2050.72	2425.12	3185.99	2584.51	2169.01	3568.08	1428.9	1198.14	1069.93	2553.94	2773.87	1232.32
CG14695	141.869	138.408	132.641	204.678	249.123	244.444	34.1578	24.735	32.98	137.639	232.748	30.6243
CG14701	496.124	337.209	337.209	254.902	203.922	317.647	248.062	143.411	143.411	390.181	258.824	178.295
CG14708	0	0	0	0	0	0	0	0	0	0	0	0
CG14710	217.671	188.755	216.064	105.475	103.865	125.604	125.874	110.334	101.787	207.497	111.648	112.665
CG14715	917.874	1045.89	971.014	114.355	158.151	165.45	263.285	207.729	181.159	978.259	145.985	217.391
CG14720	3.4904	1.7452	1.7452	0	0	0	0	0	0	2.32693	0	0
CG14722	481.258	529.451	536.814	221.999	264.252	314.554	187.416	137.885	204.15	515.841	266.935	176.484
CG14731	0	0	0	0	0	0	0	0	0	0	0	0
CG14749	257.509	290.99	316.593	115.17	144.597	159.31	120.567	104.863	133.232	288.364	139.692	119.554
CG14752	0	8.92857	23.8095	0	2.95858	0	0	0	0	10.9127	0.986193	0
CG14757	709.611	871.166	950.92	838.574	1134.17	1232.7	666.667	481.25	481.25	843.899	1068.48	543.056
CG14759	0	0	0	0	0	0	0	0	0	0	0	0
CG14760	0	0	0	0	0	0	0	0.636132	0	0	0	0.212044
CG14767	3591.12	4488.32	4031.15	3630.32	4323.28	4906.42	2302.96	2015.58	2109.81	4036.86	4286.67	2142.78
CG14770	77.2627	66.2252	90.5077	0	0	0	0	2.20751	0	77.9985	0	0.735837
CG14780	4.41501	3.31126	3.31126	0	0	0	0	0	0	3.67918	0	0
CG14795	114.943	181.034	169.54	18.3727	2.62467	5.24934	2.46914	0	0	155.172	8.7489	0.823047
CG14803	126.437	162.734	179.068	65.0407	87.9253	96.6576	40.6137	39.1095	38.207	156.08	83.2079	39.3101
CG14805	790.514	869.565	752.306	159.844	212.476	254.711	301.741	272.083	268.859	804.128	209.01	280.894
CG14806	1214.02	1119.32	1058.71	574.906	533.708	679.775	819.367	566.108	566.108	1130.68	596.13	650.528
CG14812	620	766.667	600	1013.47	1047.14	1107.74	400	366.667	356.667	662.222	1056.12	374.445
CG14814	37.706	46.5779	127.06	12.2502	37.7176	21.2766	17.425	17.425	32.5912	70.448	23.7481	22.4804
CG14817	974.843	1194.97	1084.91	253.968	380.952	444.444	449.686	339.623	311.321	1084.91	359.788	366.877
CG14818	3951.39	5395.83	4850.69	2041.24	3254.3	3955.33	1605.44	1091.84	1095.24	4732.64	3083.62	1264.17
CG14820	0	0	0.801282	0.799361	4.79616	0.799361	0	0	0	0.267094	2.13163	0
CG14823	134.347	108.999	128.01	9.22266	28.9855	38.2082	2.62467	2.62467	1.31234	123.785	25.4721	2.18723
CG14826	0	0	0	0	1.52905	1.52905	0	0	0	0	1.01937	0
CG14829	0	0	0	0	0	0	1.52207	3.04414	0	0	0	1.52207
CG14830	6569.66	10003.1	8882.35	1745.64	2368.21	3050.26	1617.86	1250.26	1118.38	8485.04	2388.04	1328.83
CG14837	73.6842	124.123	99.5614	46.5216	51.6432	58.8988	84.4156	52.8139	65.8009	99.1229	52.3545	67.6768
CG14839	0	0	0	0	0	0	0	0	0	0	0	0
CG14851	0	0	4.38596	0	2.39808	0	0	0	0	1.46199	0.79936	0
CG14853	81.9964	100.713	91.8004	32.3176	25.8541	34.1644	27.9965	32.371	40.245	91.5033	30.7787	33.5375
CG14854	1096.77	1659.5	1528.67	1287.55	1423.08	1664.84	218.018	227.027	189.189	1428.31	1458.49	211.411
CG14855	19.7842	34.7722	19.1847	4.1816	4.77897	4.77897	13.1187	5.36673	5.96303	24.5804	4.57985	8.14949
CG14857	7.14286	4.16667	7.7381	1.78042	10.089	12.4629	7.13012	7.13012	2.37671	6.34921	8.11077	5.54565
CG1486	1262.52	1777	1666.28	1207.62	1403.81	1742.86	258.2	233.791	216.629	1568.6	1451.43	236.207
CG14860	34.2205	25.3485	25.3485	19.8265	23.544	26.0223	64.8508	46.6926	46.6926	28.3058	23.1309	52.7453
CG14870	5.5325	19.3638	37.3444	45.6432	91.2863	105.118	17.9063	11.0193	16.5289	20.7469	80.6825	15.1515
CG14879	229.05	281.192	253.259	184.358	154.562	156.425	148.148	124.074	109.259	254.5	165.115	127.16
CG14905	4.22833	1.40944	1.40944	0.706215	0	0.706215	4.93305	2.81889	3.52361	2.34907	0.47081	3.75852
CG14915	0	0	0	0	0	0	0	0	0	0	0	0
CG1492	54.0541	87.8378	76.0135	8.46024	10.1523	14.6644	30.4054	25.9009	32.0946	72.6351	11.0923	29.467
CG14921	0	1.38889	4.16667	2.7894	2.7894	4.1841	1.38889	1.38889	0	1.85185	3.2543	0.925927
CG14931	0	12.1212	77.2727	0	34.5345	15.015	0	4.5045	3.003	29.798	16.5165	2.5025
CG1494	2.35988	2.35988	4.12979	0	0	0	0	0	0	2.94985	0	0
CG14945	48.4094	64.3154	61.5491	69.1824	77.5681	83.8574	536.111	457.639	488.194	58.0913	76.8693	493.981
CG14946	12483.2	15115.3	13920.3	3793.9	5245.01	5900.11	19166.7	17018.9	19436.1	13839.6	4979.67	18540.6
CG14958	0	0	0	0	0	0	0	0	0	0	0	0
CG14968	61.9765	102.178	70.3518	80.5243	104.869	138.577	68.3333	60	63.3333	78.1688	107.99	63.8889
CG14969	1114.29	1312.17	1242.33	312.369	339.623	375.262	488.625	366.963	398.615	1222.93	342.418	418.068
CG14971	363.895	483.298	461.265	539.548	637.712	748.588	276.151	243.375	229.428	436.153	641.949	249.651
CG14985	338.866	366.528	413.555	448.611	409.722	490.278	640.387	446.75	542.185	372.983	449.537	543.107
CG15012	2114.04	2361.84	2013.16	2302.63	2355.26	2684.21	1723.68	1228.07	1317.98	2163.01	2447.37	1423.24
CG15014	272.634	351.852	333.333	107.527	172.043	162.268	295.716	242.424	249.739	319.273	147.279	262.626
CG15019	1541.1	1344.75	1401.83	243.678	227.586	308.046	1554.79	942.922	1093.61	1429.23	259.77	1197.11
CG15024	0	0	0	0	0	0	3.14465	3.14465	0	0	0	2.09643
CG15027	425.926	383.333	350	400	483.333	512.963	305.709	257.827	226.519	386.42	465.432	263.352
CG15034	0	16.0256	3.20513	0	0	3.7037	0	0	0	6.41024	1.23457	0
CG15035	6.23886	5.34759	8.02139	0	0	0.881834	0	0	0	6.53595	0.293945	0
CG15036	740.741	648.148	620.37	16348	12848	12740.2	5399.06	4469.48	7098.59	669.753	13978.7	5655.71
CG1504	1.56863	0	0	0.798722	0	1.59744	3.13725	4.70588	1.56863	0.522877	0.798721	3.13725
CG15044	0	0	4.16667	43.0108	45.1613	47.3118	2.13675	6.41026	2.13675	1.38889	45.1613	3.56125
CG15073	116.667	144.253	127.586	101.13	88.7006	92.6554	192.893	178.793	182.177	129.502	94.162	184.621
CG15080	2.37941	3.24465	3.02834	8.8286	3.87597	9.47459	0.430385	0.215193	0	2.88413	7.39305	0.215193
CG15082	279.279	390.766	336.712	111.872	157.534	160.959	106.332	101.553	81.2425	335.586	143.455	96.3758
CG15083	1700	2875.56	2440	4322.15	6046.98	6472.04	4600	3615.56	3788.89	2338.52	5613.72	4001.48
CG15084	226.793	234.177	225.738	74.6583	65.1945	104.101	79.6646	75.4717	54.5073	228.903	81.3179	69.8812
CG15087	223.874	304.054	313.964	316.553	307.937	370.975	341.892	313.514	338.739	280.631	331.822	331.382
CG15093	939.3	1346.71	1363.17	637.771	913.313	862.745	481.481	361.111	383.745	1216.39	804.61	408.779
CG15096	997.963	1363.88	1406.65	782.696	857.814	818.913	1196.2	1116.09	923.965	1256.16	819.808	1078.75
CG15097	35.1162	64.2896	54.0249	21.1039	18.3983	26.5152	16.7477	11.3452	12.966	51.1436	22.0058	13.6863
CG15098	20405	25457	23157.7	28397.8	33516.1	38738.4	11518.7	9994.65	10199.6	23006.6	33550.8	10571
CG15099	540.721	775.298	696.165	624.628	754.495	885.008	473.441	401.848	398.64	670.728	754.71	424.643
CG15100	264.84	344.423	353.555	200.838	172.147	196.003	187.152	173.714	178.63	320.939	189.663	179.832
CG15109	6.85518	3.42759	0	0	1.74978	1.74978	0	0	0	3.42759	1.16652	0
CG15111	912.409	1191.4	1123.28	1208.13	1465.04	1734.96	741.306	620.017	631.043	1075.7	1469.38	664.122
CG15115	0	0	0	0	0	0	1.20337	0	0	0	0	0.401123
CG15116	0	0	1.72712	0	0	0	0	0	0	0.575707	0	0
CG15117	187.5	268.293	244.919	309.136	280	321.481	124.492	98.5772	134.146	233.571	303.539	119.072
CG15120	200.216	215.368	212.121	48.3701	72.5552	57.8339	31.8471	27.6008	27.6008	209.235	59.5864	29.0162
CG15125	0	0	0	0	0	0	0	0	0	0	0	0
CG15127	0	0	0	0	0	0	0	0	0	0	0	0
CG15128	0	0.574713	0	2.28311	2.28311	0.570776	1.72612	1.72612	1.15075	0.191571	1.71233	1.53433
CG15130	22.792	28.49	28.49	25.8621	45.977	43.1034	52.8053	29.703	36.3036	26.5907	38.3142	39.604
CG15136	5.26316	0	0	0	0	0	0	0	0	1.75439	0	0
CG15141	201.32	257.426	241.749	156.224	157.059	191.312	211.221	159.241	164.191	233.498	168.198	178.218
CG15142	1.61812	1.61812	3.23625	0	0	0	0	0	0	2.1575	0	0
CG15147	0	0	0	0	0	0	0	2.38095	0	0	0	0.79365
CG15152	0	2.97619	2.97619	0	0	0	0	0	0	1.98413	0	0
CG15153	0	0	0	0	0	0	0	0	0	0	0	0
CG15155	0	0	0	14.742	28.2555	24.57	1.20337	1.20337	0	0	22.5225	0.802247
CG1516	6824	8933.72	8783.07	2538.18	3451.78	3841.97	1993.87	1756.06	1792.54	8180.26	3277.31	1847.49
CG15161	105.769	177.083	146.635	53.5855	61.4657	72.498	54.5024	45.8136	45.0237	143.162	62.5164	48.4466
CG15167	0	0	0	0	0	0	0	0	0	0	0	0
CG15168	1470.95	1434.25	1406.73	1827.16	1827.16	2358.02	6724.77	4862.39	4391.44	1437.31	2004.11	5326.2
CG1518	809.257	1061.71	1041.14	1010.77	1323.97	1518.26	879.383	763.441	787.284	970.702	1284.33	810.036
CG15198	0	0	0	0	0	0	2.46914	0	0	0	0	0.823047
CG15201	10002.9	17418.9	15728.6	8015.43	11901.2	13675.9	64.2202	39.7554	30.581	14383.5	11197.5	44.8522
CG15202	4028.99	4773.91	4591.3	698.83	897.661	1090.64	246.377	188.406	136.232	4464.73	895.71	190.338
CG15208	0	0	0	0	0.865801	6.06061	1.7316	1.7316	0	0	2.3088	1.1544
CG15209	108.844	90.7029	104.308	563.131	633.838	818.182	106.87	94.1476	68.7023	101.285	671.717	89.9066
CG15210	120.773	140.097	198.068	184.08	199.005	164.179	34.3137	29.4118	14.7059	152.979	182.421	26.1438
CG15211	493.409	804.143	994.35	2458.33	2674.24	3000	973.635	887.006	700.565	763.967	2710.86	853.735
CG15213	32.2581	53.7634	53.7634	120.482	257.028	240.964	0	0	0	46.595	206.158	0
CG15219	5.69801	2.849	2.849	0	0	2.87356	0	0	0	3.79867	0.957853	0
CG15221	0	0.611621	3.0581	0	0	0.634921	0	1.22324	0	1.22324	0.21164	0.407747
CG15227	0	0	0	0	0	0	0	0	0	0	0	0
CG15247	77.9343	105.164	140.845	62.3836	121.974	168.529	5.44959	3.63306	0.908265	107.981	117.629	3.3303
CG15249	0	0	0	0	0	1.84162	105.461	97.9284	97.9284	0	0.613873	100.439
CG15255	0	1.27714	2.55428	1.27714	2.55428	5.10856	0	0	0	1.27714	2.97999	0
CG15258	0	0	0	0	0	0	0	0	0	0	0	0
CG15262	0	0	0.761035	0	0	0	0	0	0	0.253678	0	0
CG15263	0	0	0	0	0	0	0	0	0	0	0	0
CG15269	6.81431	10.2215	9.65361	0	0	0.55371	0	0	0.556483	8.89647	0.18457	0.185494
CG15279	1897.76	2665.62	2468.44	55.0363	48.2866	80.9969	20.8333	18.75	21.3542	2343.94	61.4399	20.3125
CG15283	0	0	0	0	0	0	0	0	0	0	0	0
CG15296	11.8343	5.91716	1.97239	0	0	1.97239	0	0	0	6.57462	0.657463	0
CG15309	441.52	692.982	739.766	218.289	348.083	492.625	192.982	184.211	175.439	624.756	352.999	184.211
CG15317	94.9914	148.532	153.713	154.514	180.556	204.861	53.5406	60.4491	48.3592	132.412	179.977	54.1163
CG1532	4791.67	5653.94	4953.7	3407.62	4228.64	4705.54	821.759	692.13	655.093	5133.1	4113.93	722.994
CG15322	25.6757	48.1982	42.7928	0.903342	0.451671	2.71003	0	0.887705	0.887705	38.8889	1.35501	0.591803
CG15330	0	0	0	0	0	0	0	0	0	0	0	0
CG15337	29.6296	33.7449	35.3909	0	0	2.40385	5.64972	7.26392	5.64972	32.9218	0.801283	6.18779
CG15347	205.607	272.586	233.645	428.986	531.884	675.362	64.9351	70.7071	44.733	237.279	545.411	60.1251
CG15357	0	0	0	0	0	0	0	0	0	0	0	0
CG15358	0	0	0	0	0	0	0	0	1.33869	0	0	0.44623
CG15369	21.8579	40.9836	30.0546	150.538	198.925	357.527	2.68817	0	0	30.9654	235.663	0.896057
CG15370	3.6036	1.8018	0.900901	1.82648	0.913242	0	2.65957	1.77305	0	2.1021	0.913241	1.47754
CG15373	3.00842	1.50421	0	0	0	0	0	0	0	1.50421	0	0
CG15387	63.2184	89.0805	109.195	49.2754	84.058	92.7536	149.425	100.575	94.8276	87.1646	75.3623	114.943
CG15390	83.6364	111.515	78.7879	59.6107	81.5085	59.6107	137.681	118.357	142.512	91.3131	66.91	132.85
CG15394	5639.41	6953.88	6911.95	376.543	444.444	549.383	1257.67	1173.82	1102.25	6501.75	456.79	1177.91
CG15395	0	0	0	1.17371	0	1.17371	0	0	0	0	0.782473	0
CG15398	0	0	0	0	0	0	0	0	0	0	0	0
CG15399	13.7741	15.1515	20.6612	1.38313	0	0	0	1.37741	0	16.5289	0.461043	0.459137
CG15403	0	0	0	0	0	0	0	0	0	0	0	0
CG15404	0	0	0	0	0	0	0	0	0	0	0	0
CG15414	0	8.33333	3.125	4.2061	4.2061	5.25762	6.15385	4.10256	2.05128	3.81944	4.55661	4.10256
CG1542	381.107	419.11	391.965	168.845	171.024	174.292	145.494	107.492	118.35	397.394	171.387	123.779
CG15422	16.0256	12.8205	12.8205	0	0	0	0	0	0	13.8889	0	0
CG15423	118.38	52.9595	28.0374	0	0	0	0	0	0	66.459	0	0
CG15425	0	0	0	1.65837	0	0	1.64204	0	0	0	0.55279	0.547347
CG15429	0	1.55039	0	0	0	0	0	0	0	0.516797	0	0
CG15432	584.746	522.599	567.797	347.826	356.522	394.203	344.633	251.412	223.164	558.381	366.184	273.07
CG15434	0	3.50877	0	0	0	3.5461	0	3.50877	0	1.16959	1.18203	1.16959
CG15435	104.042	80.1856	96.7528	60.1852	68.1217	83.3333	72.1785	70.21	70.21	93.6601	70.5467	70.8662
CG15439	107.143	126.653	128.307	124.748	155.6	185.446	71.4286	58.6854	63.7156	120.701	155.265	64.6099
CG15440	386.905	574.405	538.69	369.048	435.516	388.889	282.888	220.574	211.672	500	397.818	238.378
CG15445	627.292	836.57	761.057	538.753	581.03	691.599	312.67	233.823	254.486	741.64	603.794	266.993
CG15450	0	0	0	0	0	0	0	0	0	0	0	0
CG15452	0	0	0	0	0	0	0	0	0	0	0	0
CG15458	0	5.29101	0	0	0	0	0	0	0	1.76367	0	0
CG15461	0	0	0	5.05051	5.05051	0	5.74713	40.2299	11.4943	0	3.36701	19.1571
CG15471	0	0	0	0	0	0	0	0	0	0	0	0
CG15475	0	2.86123	1.43062	0	0	0	0	1.29702	0	1.43062	0	0.43234
CG15479	27.5081	24.2718	32.3625	1.63399	0	1.63399	1.7094	1.7094	0	28.0475	1.08933	1.1396
CG15480	0	6.0241	0	0	0	0	0	0	2.07039	2.00803	0	0.69013
CG15483	0	0	0	0	0	0	0	0	0	0	0	0
CG15485	0.498256	0	0	0	0	0	0	0	0	0.166085	0	0
CG15497	178.205	232.051	212.821	0	0	0	2.5641	0	1.28205	207.692	0	1.28205
CG1550	410.543	530.351	505.325	280.533	324.267	374.933	232.694	184.771	190.628	482.073	326.578	202.698
CG15506	12.3457	13.468	12.3457	416.667	365.297	398.402	92.4658	71.9178	82.1918	12.7198	393.455	82.1918
CG15515	24.3902	21.6802	35.2304	0	0	0	2.71003	8.13008	2.71003	27.1003	0	4.51671
CG1552	0	0	1.81159	1.96078	1.96078	1.96078	17.5439	3.89864	13.6452	0.603863	1.96078	11.6959
CG15522	38.5356	69.3642	55.8767	50.5618	39.3258	39.3258	29.7952	26.0708	29.7952	54.5922	43.0711	28.5537
CG15525	262.94	298.137	407.867	160.417	225	243.75	337.474	207.039	262.94	322.981	209.722	269.151
CG15536	278.369	242.908	246.454	69.1489	76.2411	74.4681	42.1053	35.0877	28.0702	255.91	73.286	35.0877
CG15537	0.944287	1.88857	0.944287	2.7933	0.931099	4.65549	12.2411	13.1827	17.8908	1.25905	2.7933	14.4382
CG15543	0	0	0	0	0	0	0	0	0	0	0	0
CG15545	77.2812	52.1415	60.5214	0	0	0.977517	0	0	0	63.3147	0.325839	0
CG15548	0	0	0	0	0	0.402576	0	0	0	0	0.134192	0
CG15549	0	0	0	0	0	0	0	0	0	0	0	0
CG15550	0	2.331	0	2.39808	0	7.19424	0	0	0	0.777	3.19744	0
CG15554	126.984	115.646	113.379	0	0	0	0	0	0	118.67	0	0
CG15556	1009.27	1294.48	1310.38	1003.11	1261.78	1411.56	681.758	611.185	641.811	1204.71	1225.48	644.918
CG15561	126.984	140.99	130.719	145.894	145.894	170.048	158.548	90.7354	107.927	132.898	153.945	119.07
CG15571	0	2.19298	2.19298	0	0	1.93798	0	0	0	1.46199	0.645993	0
CG15576	0	0	0	0	0	0	0	0	0	0	0	0
CG15577	0	0	0	0	0	3.367	3.33333	0	0	0	1.12233	1.11111
CG15579	14.1844	3.5461	14.1844	0	0	0	0	0	0	10.6383	0	0
CG15594	2.06398	8.25593	7.22394	0	0	0	0	0	0	5.84795	0	0
CG15602	652.047	620.858	587.719	251.429	253.333	275.238	340.974	276.982	293.219	620.208	260	303.725
CG15605	0	0	0	0	0	0	0	0	0	0	0	0
CG15614	0	0.710732	1.42146	4.92264	5.62588	1.40647	0.710732	0	1.42146	0.710731	3.985	0.710731
CG15615	0	3.67309	0.918274	1.84162	2.76243	1.84162	0.908265	0	0	1.53045	2.14856	0.302755
CG15617	0	1.5015	0	0	3.01659	7.54148	0	0	0	0.5005	3.51936	0
CG15618	73.1195	117.984	108.247	27.3504	34.378	35.7075	20	17.7143	13.1429	99.7835	32.4786	16.9524
CG15625	1.91022	6.68577	7.64088	0.95511	0	0.95511	4.7619	4.7619	0.952381	5.41229	0.63674	3.49206
CG15628	389.194	558.608	518.315	238.751	284.665	352.617	255.495	206.96	183.15	488.706	292.011	215.202
CG15629	84.1026	96.4103	103.59	9.25926	17.4897	10.2881	14.359	12.3077	7.17949	94.701	12.3457	11.2821
CG15638	6.23053	3.11526	0	0	0	0	0	2.84091	0	3.11526	0	0.94697
CG15641	0	0	0	0	0	0	0	0	0	0	0	0
CG15642	41.8944	76.5027	92.8962	43.3145	64.0301	73.4463	7.32601	5.49451	3.663	70.4311	60.2636	5.49451
CG15643	61.3208	135.22	113.208	72.5309	126.543	123.457	46.0829	36.8664	33.7942	103.25	107.51	38.9145
CG15649	0	0	0	2.82486	2.82486	8.47458	5.60224	2.80112	0	0	4.7081	2.80112
CG15651	49.5338	74.0093	61.1888	28.021	32.1074	46.7017	23.8928	16.317	15.7343	61.5773	35.61	18.648
CG15653	145.098	141.176	125.49	30.6513	24.9042	30.6513	85.7143	59.0476	60.9524	137.255	28.7356	68.5714
CG15657	0	0	0	0	0	0	0	0	0	0	0	0
CG15673	3271.24	4321.9	4437.91	3620.46	3102.31	4133.66	1164.3	1097.95	960.506	4010.35	3618.81	1074.25
CG15696	27.933	33.5196	24.2086	0	0	0	0	0	0	28.5537	0	0
CG15704	0	0	0	0	0	0	0	0	0	0	0	0
CG15706	259.74	376.005	349.412	48.1551	62.5391	79.4246	197.878	172.285	168.539	328.386	63.3729	179.567
CG1571	2.04813	2.56016	2.04813	1.02564	0	0.512821	0	0	0	2.21881	0.51282	0
CG15710	0	0	0	0	0	0	0	0	0	0	0	0
CG15711	0	0	0	0	0	0	0	0	0	0	0	0
CG15712	0	0	0	0	0	0	0	0	0	0	0	0
CG15715	2419.91	2164.5	2064.94	1539.47	1763.16	2333.33	2692.64	2207.79	2320.35	2216.45	1878.65	2406.93
CG15717	502.646	637.566	600.529	179.79	187.664	141.732	112.418	98.0392	65.3595	580.247	169.729	91.9389
CG15719	0	0	0	0	0	0	0	0	0	0	0	0
CG1572	3668.75	5004.17	5087.5	3402.52	2941.3	3828.09	3429.17	2629.17	2906.25	4586.81	3390.64	2988.2
CG15728	0	0	0	0	0	0	0	0	1.11857	0	0	0.372857
CG15734	84.1121	52.9595	77.8816	0	0	0	0	0	0	71.6511	0	0
CG15735	978.495	1384.02	1314.9	1226.85	1439.81	1637.35	1768.05	1525.35	1672.81	1225.81	1434.67	1655.4
CG15739	44.3723	85.4978	86.5801	15.1025	17.26	12.945	16.129	7.52688	2.15054	72.1501	15.1025	8.60214
CG15743	322.066	502.347	511.737	630.885	900.188	1053.67	261.033	264.789	266.667	445.383	861.581	264.163
CG15747	298.019	279.931	319.552	237.607	275.214	290.598	104.592	85.8844	78.2313	299.167	267.806	89.5692
CG15754	0	0	0	0	0	0	0	0	0	0	0	0
CG15756	0	0	0	0	0	0	0	0	0	0	0	0
CG15766	84.8765	94.1358	69.4444	122.481	218.605	196.899	1.54321	4.62963	0	82.8189	179.328	2.05761
CG15771	1151.17	1596.24	1466.67	656.977	1008.72	1171.51	2688.82	2259.15	2136.8	1404.69	945.736	2361.59
CG15772	63.0631	102.96	75.9331	65.3846	84.6154	108.974	12.5786	5.03145	7.54717	80.6521	86.3247	8.38574
CG15773	5.5788	4.88145	4.88145	2.15054	5.01792	3.58423	0	0.715308	0.715308	5.1139	3.58423	0.476872
CG15800	0	0	4.24628	0	0	0	3.76648	1.88324	0	1.41543	0	1.88324
CG15814	1002.08	1271.03	1183.8	756.25	1038.54	1096.88	526.48	410.177	387.331	1152.3	963.89	441.329
CG1582	514.493	703.416	680.124	373.447	480.331	542.961	221.36	191.621	215.154	632.678	465.58	209.378
CG15824	5.79118	4.7692	6.13183	0.506073	0.843455	0.843455	0.169635	0	0	5.56407	0.730994	0.056545
CG15829	69.1057	101.626	81.3008	28.8066	32.9218	65.8436	24.3902	20.3252	40.6504	84.0108	42.524	28.4553
CG15863	207.071	166.667	242.424	101.781	162.85	170.483	376.263	250	255.051	205.387	145.038	293.771
CG15864	39.4558	55.102	48.9796	1.98413	0	3.30688	11.9522	3.32005	3.98406	47.8458	1.76367	6.41877
CG15865	0	0	0.307503	0	0	0	0	0	0	0.102501	0	0
CG15873	0	0	0	0	0	2.24467	0	0	0	0	0.748223	0
CG15876	0	0	0	0	0	0	0	0	0	0	0	0
CG15877	300.842	302.046	297.232	124.088	159.367	226.277	290.909	180.606	206.061	300.04	169.911	225.859
CG15878	0.747384	2.24215	0	0	0	0	2.19298	0.730994	0	0.996511	0	0.974658
CG15890	4967.72	6919.87	6809.13	2763.33	2755	2791.11	3113.7	2858.01	2868	6232.24	2769.81	2946.57
CG15891	1221.48	1458.61	1259.51	791.139	1354.43	1569.62	255.765	127.883	129.979	1313.2	1238.4	171.209
CG15892	44.8934	46.0157	41.5264	15.7658	22.5225	34.9099	0	1.12233	0	44.1452	24.3994	0.37411
CG15896	88.848	100.49	120.711	83.4927	119.822	133.843	34.0633	26.1557	28.5888	103.35	112.386	29.6026
CG15905	0	0	0	0	0	0	0	0	0	0	0	0
CG15912	107.046	119.241	111.111	65.3061	62.585	80.2721	71.8157	77.2358	67.7507	112.466	69.3877	72.2674
CG15914	103.448	116.711	139.699	52.7256	74.1734	77.748	115.865	80.2139	101.604	119.953	68.2157	99.2276
CG15923	78.9295	125.678	107.046	32.1577	37.3444	37.3444	79.0903	81.127	77.3931	103.885	35.6155	79.2035
CG15925	0	0	0	0	0	0	0	0	0	0	0	0
CG15927	1.76367	1.76367	1.76367	7.01754	7.01754	7.01754	0	0	0	1.76367	7.01754	0
CG1597	463.683	658.814	584.609	385.044	480.111	513.922	250.892	191.042	177.17	569.035	459.692	206.368
CG1602	99.3645	119.006	96.476	73.8832	81.3288	97.3654	150.685	131.279	134.132	104.949	84.1925	138.699
CG1603	239.477	223.549	212.173	134.202	156.852	181.2	169.501	128.118	144.558	225.066	157.418	147.392
CG1607	221.561	294.312	286.376	2172.13	3000	3413.93	1591.21	1477.69	1222.44	267.416	2862.02	1430.45
CG1620	856.086	1101.82	1093.86	363.533	466.097	525.926	314.626	239.229	253.401	1017.26	451.852	269.085
CG1636	635.253	849.04	774.869	371.429	421.645	469.264	641.361	525.305	455.497	753.054	420.779	540.721
CG1640	3175.65	4155.36	3890.43	1753.5	2519.23	2859.56	833.045	712.147	697.755	3740.48	2377.43	747.649
CG1648	14923.2	24620.3	21530.4	5588.74	7809.52	9594.52	2296.3	1616.81	1743.59	20358	7664.26	1885.57
CG1662	700.68	1006.8	1005.44	543.21	794.239	925.926	193.197	176.871	165.986	904.307	754.458	178.685
CG1665	583.333	838.235	689.216	638.151	717.797	862.34	717.647	626.471	629.412	703.595	739.429	657.843
CG1667	420.797	536.443	575.316	78.3758	107.649	103.872	464.217	352.031	363.636	510.852	96.6323	393.295
CG16704	168.776	135.021	177.215	739.865	804.054	1006.76	42.1941	8.43882	12.6582	160.337	850.226	21.097
CG1671	261.33	343.075	315.121	138.677	197.625	208.651	103.346	103.346	100.805	306.509	181.651	102.499
CG16712	67044.7	74215.4	64577.2	11711.9	13398.3	19432.2	12776.4	10666.7	10459.3	68612.4	14847.5	11300.8
CG16713	3195.12	3699.19	3390.24	9887.1	8471.77	12233.9	19764.2	17410.6	16329.3	3428.18	10197.6	17834.7
CG16716	0	0	0.384468	0	0	0.384468	0	0.383142	0	0.128156	0.128156	0.127714
CG16717	373.333	527.778	567.778	85.2713	78.6268	96.3455	142.384	112.583	102.649	489.63	86.7479	119.205
CG16719	0	0	0	0	0	0	0	0	0	0	0	0
CG16721	1381.92	1634.28	1525.64	810.391	1151.15	1486.5	491.903	477.733	493.927	1513.95	1149.35	487.854
CG1673	337.096	349.135	381.49	159.91	198.949	192.943	13.4831	8.2397	5.99251	355.907	183.934	9.23844
CG16734	79.7592	125.658	118.134	187.157	223.962	245.106	226.002	189.72	198.791	107.85	218.742	204.838
CG16736	3.61011	7.22022	3.61011	11.4943	11.4943	11.4943	14.8402	5.70776	21.6895	4.81348	11.4943	14.0792
CG16739	3.96825	7.93651	7.93651	0	1.96078	1.96078	3.89864	1.94932	3.89864	6.61376	1.30719	3.24887
CG16741	0	0	0	0	0	0	0	0	0	0	0	0
CG16743	470.486	397.569	482.639	48.6111	74.6528	88.5417	24.055	8.59107	18.9003	450.231	70.6019	17.1821
CG16749	8.80503	7.54717	11.3208	8.23529	1.17647	7.05882	30.1887	40.2516	28.9308	9.22433	5.49019	33.1237
CG16753	154.426	197.74	177.024	39.3258	78.6517	58.0524	135.94	67.0391	96.8343	176.397	58.6766	99.9378
CG16762	366.142	585.302	443.57	10.8401	5.42005	20.3252	1.29199	0	1.29199	465.005	12.1951	0.861327
CG16771	114.653	138.143	137.584	127.758	147.503	164.925	168.067	136.134	146.218	130.127	146.729	150.14
CG16782	23.3333	58.3333	53.3333	0	0	1.67504	5	1.66667	1.66667	45	0.558347	2.77778
CG16787	235.837	341.238	310.935	138.889	177.249	179.894	192.358	169.96	184.453	296.003	165.344	182.257
CG16790	458.656	665.375	585.271	24.6433	40.2075	35.0195	14.2119	21.9638	28.4238	569.767	33.2901	21.5332
CG16800	0	0	0	0	0	0	0	0	0	0	0	0
CG16812	413.187	486.447	469.597	224.415	281.433	319.444	193.833	139.501	157.856	456.41	275.097	163.73
CG16826	12.7077	32.2581	1.95503	0	3.72439	0.931099	2.91545	0	0	15.6403	1.55183	0.971817
CG16833	256.769	287.27	336.446	147.975	195.327	213.396	304.646	241.971	257.25	293.495	185.566	267.956
CG16836	2583.33	1754.39	1144.74	482.051	215.385	256.41	942.982	517.544	649.123	1827.49	317.949	703.216
CG16837	0	0	0	0	0	0	0	0	0	0	0	0
CG16854	0	0	0	0	0	0	0	0	0	0	0	0
CG16865	224.022	218.623	225.371	73.7705	107.923	91.5301	285.714	195.918	180.952	222.672	91.0745	220.861
CG1688	26.5069	43.9361	42.8468	8.9222	19.2719	21.7702	11.4572	7.16076	8.59291	37.7633	16.6548	9.07029
CG16890	240.31	315.245	272.61	151.163	147.287	151.163	241.026	156.41	173.077	276.055	149.871	190.171
CG16892	108.727	149.499	173.82	85.6531	137.045	125.625	93.3048	74.0741	79.7721	144.015	116.108	82.3837
CG16894	0	0	0	0	0	0	0	0	0	0	0	0
CG16896	159.582	203.104	217.949	41.54	53.0226	54.0358	75.2581	67.9321	66.2671	193.545	49.5328	69.8191
CG16898	3.276	6.55201	6.55201	0.821018	0.821018	0	296.478	276.003	247.338	5.46001	0.547345	273.273
CG1690	0	0	0	0	0	0	0	0	0	0	0	0
CG16926	1181.1	1152.23	1553.81	100.529	246.032	431.217	95.2381	23.8095	44.9735	1295.71	259.259	54.6737
CG16935	1478.06	1722.69	1571.43	1263.11	1564.61	1619.85	1045.75	846.872	879.552	1590.73	1482.52	924.058
CG16947	136.259	166.282	146.266	91.0494	84.8765	102.623	359.823	337.748	328.182	149.602	92.8496	341.918
CG16952	407.083	526.641	533.788	358.749	513.522	572.499	178.422	145.894	145.572	489.171	481.59	156.629
CG16956	0	1.67504	3.35008	0	3.12989	0	0	0	0	1.67504	1.0433	0
CG16957	0	0	0	0	0	0	0	0	0	0	0	0
CG16959	855.533	930.417	1212.06	300	324	433.333	97.1391	92.4817	52.5615	999.337	352.444	80.7274
CG16974	969.504	1203.92	1217.45	1043.71	1277.29	1552.16	1232.82	1092.43	981.137	1130.29	1291.05	1102.13
CG16979	532.674	751.785	667.216	473.915	558.484	641.406	372.807	304.276	283.443	650.558	557.935	320.175
CG1698	333.843	615.698	436.799	70.6605	66.0522	95.7501	7.15746	7.15746	8.17996	462.113	77.4876	7.49829
CG16985	883.669	1044.74	700.224	583.333	648.649	763.514	1109.62	785.235	668.904	876.211	665.165	854.586
CG16986	657.343	762.238	708.625	622.066	720.657	809.859	1053.61	692.308	771.562	709.402	717.527	839.16
CG16995	0	0	0	0	0	0	2.07039	0	0	0	0	0.69013
CG17003	0	0	0	0	0	1.0929	0	0	0	0	0.3643	0
CG17005	1.64474	1.09649	3.28947	6.58979	9.88468	9.33553	0	0	0	2.01023	8.60333	0
CG17010	0.777001	3.108	0.777001	0	0	1.53257	0	0	0	1.554	0.510857	0
CG1703	975.953	1020.72	1042.18	494.19	554.103	622.367	515.952	416.208	453.612	1012.95	556.887	461.924
CG17036	28.5494	58.642	49.3827	20.0617	38.5802	41.6667	70.0539	56.9669	63.1255	45.5247	33.4362	63.3821
CG17047	15.3061	11.0544	19.5578	3.44531	1.72265	2.58398	0	0.859107	0	15.3061	2.58398	0.286369
CG17048	0	0	0	0	0	0	0	0	0	0	0	0
CG17059	1690.14	1342.72	1183.1	1190.48	871.429	990.476	1502.35	985.915	1056.34	1405.32	1017.46	1181.53
CG17065	451.639	752.998	729.017	228.112	292.369	293.173	101.763	84.1346	89.7436	644.551	271.218	91.8804
CG1707	2321.97	2772.73	2785.98	958.491	1286.79	1433.96	1125	988.636	914.773	2626.89	1226.41	1009.47
CG17075	70.2479	92.2865	80.9229	44.6521	57.8055	64.036	46.1433	30.6474	30.9917	81.1524	55.4979	35.9275
CG17083	0	0	0	0	0	0	0	0	0	0	0	0
CG17119	287.993	442.485	382.872	377.551	482.993	427.721	595.533	583.127	521.919	371.117	429.422	566.86
CG17121	1562.33	2072.95	1877.19	302.778	341.667	406.481	445.983	289.012	325.023	1837.49	350.309	353.339
CG17122	20.6243	35.6745	35.1171	12.842	10.0503	20.6588	8.91862	7.24638	7.80379	30.472	14.517	7.9896
CG17124	723.118	739.247	752.688	279.133	355.014	452.575	96.7742	91.3978	69.8925	738.351	362.241	86.0215
CG17127	170.068	193.878	176.871	12498.3	9690.72	10443.3	602.041	683.673	1210.88	180.272	10877.4	832.198
CG17154	0	0	2.73224	0	0	0	0	8.26446	5.50964	0.910747	0	4.59137
CG17163	244.624	268.817	258.065	375.661	412.698	449.735	178.478	136.483	141.732	257.169	412.698	152.231
CG17168	718.923	861.441	813.143	354.411	390.32	420.765	336.427	248.26	260.634	797.836	388.499	281.774
CG17180	194.26	247.241	218.543	112.222	160	168.889	141.75	126.246	124.031	220.015	147.037	130.676
CG17186	103.237	118.11	149.606	55.1039	50.5872	59.6206	92.7456	78.0533	66.1157	123.651	55.1039	78.9715
CG17187	208.473	279.822	272.018	63.8792	70.8479	53.4262	55.7414	34.5596	46.8227	253.438	62.7178	45.7079
CG17190	1068.74	1361.87	1357.98	296.247	319.035	408.847	397.59	352.075	353.414	1262.86	341.376	367.693
CG17193	0	0	4.90196	0	0	0	4.90196	14.7059	4.90196	1.63399	0	8.16994
CG17199	0	0	0	0	0	0	0	0	0	0	0	0
CG17202	519.337	758.748	837.937	308.571	411.429	373.333	647.94	492.509	481.273	705.341	364.444	540.574
CG17209	152.085	168.956	174.018	127.927	165.822	161.236	108.617	108.617	104.031	165.02	151.662	107.088
CG1722	105.952	257.143	107.143	4.97512	7.46269	8.70647	24.0811	6.33714	7.60456	156.746	7.04809	12.6743
CG17230	214.904	279.441	258.15	37.3333	49.3333	52.6667	45.2428	51.8962	61.2109	250.832	46.4444	52.7833
CG17237	1.73611	0	0	1.75439	3.50877	1.75439	1.7452	0	0	0.578703	2.33918	0.581733
CG17242	0	0	0	0	0	0	0	0	1.34953	0	0	0.449843
CG17244	276.73	241.09	339.623	79.6646	121.593	180.294	37.2671	16.5631	8.28157	285.814	127.184	20.7039
CG17249	207.627	253.531	267.655	220.099	207.36	233.546	220.099	168.436	183.298	242.938	220.335	190.611
CG17258	5.70776	6.08828	10.274	1.90259	1.52207	1.90259	5.70125	5.32117	2.66059	7.35668	1.77575	4.561
CG17259	1100.47	1503.66	1436.46	938.667	1181.33	1416	618.097	528.942	518.962	1346.86	1178.67	555.334
CG17264	725.379	970.17	929.451	0	1.40845	0	0	0	0.462749	875	0.469483	0.15425
CG17266	176.685	216.758	191.257	47.619	43.956	58.6081	162.113	123.862	111.111	194.9	50.061	132.362
CG17272	908.277	1024.61	957.494	722.973	1146.4	1250	2319.91	1606.26	1865.77	963.46	1039.79	1930.65
CG17283	0	0	0.716846	0	0.707714	0	0	0	0	0.238949	0.235905	0
CG17287	0	0	0	0	0	0	0	0	0	0	0	0
CG17294	415.686	479.739	449.673	212.01	210.784	234.069	306.471	233.211	219.78	448.366	218.954	253.154
CG17300	0	0	0	0	0	0	0	0	0	0	0	0
CG17321	112.601	151.921	158.177	57.1939	45.5764	41.1081	33.9589	26.8097	25.916	140.9	47.9595	28.8949
CG17325	8636.36	9831.17	8051.95	1451.75	662.281	1495.61	714.286	324.675	640.693	8839.83	1203.21	559.885
CG17327	827.338	1187.05	1067.15	224.638	246.377	410.628	434.053	357.314	357.314	1027.18	293.881	382.894
CG17328	79.096	108.152	107.345	60.6796	56.6343	66.343	108.959	79.9031	95.2381	98.1977	61.219	94.7001
CG17329	0	16.4609	24.6914	4.01606	0	0	7.98403	0	5.98802	13.7174	1.33869	4.65735
CG17349	0	0	0	0	0	1.25786	1.25313	0	0	0	0.419287	0.41771
CG17350	2917.98	3654.05	3369.09	6320.91	6332.3	7125.26	5577.64	4713.25	4621.12	3313.71	6592.82	4970.67
CG1737	517.144	734.182	724.638	416.4	521.832	609.514	227.099	174.852	186.695	658.655	515.915	196.215
CG17378	79.235	127.869	119.672	39.3443	37.1585	50.8197	43.0987	34.3699	36.5521	108.925	42.4408	38.0069
CG1738	146.52	122.711	135.531	52.2523	55.8559	90.0901	117.647	80.2139	49.9109	134.921	66.0661	82.5906
CG17385	1077.94	1328.54	1298.56	678.7	839.952	1039.71	511.99	458.034	477.218	1235.01	852.787	482.414
CG17386	13.0719	10.3806	11.1496	24.0275	23.6461	23.6461	9.92745	11.0729	6.1092	11.534	23.7732	9.03652
CG17404	8.48485	0	1.21212	0	0	0	0	0	0	3.23232	0	0
CG17454	951.989	1632.37	1578.88	732.782	1129.48	1279.61	2779.15	1799.73	1776.41	1387.75	1047.29	2118.43
CG1746	39695.7	53864.7	49398.6	23438	35313.9	42576.6	52241.5	42543.5	46666.7	47653	33776.2	47150.6
CG17470	26.3566	37.2093	46.5116	0	0	3.10078	0	0	0	36.6925	1.03359	0
CG17475	0	0	1.15741	0	0	0	0	0	0	0.385803	0	0
CG17493	2018.32	2294.87	2221.61	3539.59	3414.36	4165.75	6923.81	5163.81	5478.1	2178.27	3706.57	5855.24
CG17528	634.581	951.426	920.232	593.197	696.145	804.989	3019.5	2242.46	2406.91	835.413	698.11	2556.29
CG17544	640.212	843.675	672.439	598.266	849.711	786.127	1709.48	1359.31	1449.74	718.775	744.701	1506.18
CG17564	0	0.995025	0.995025	0	0	0	0	0	0	0.66335	0	0
CG17568	153.346	151.397	158.545	154.902	171.895	220.261	108.738	78.3172	78.3172	154.429	182.353	88.4575
CG17570	0	0	0	0	0	0	0	0	0	0	0	0
CG17572	2281.39	3321.21	2856.28	1352.51	1572.6	1604.57	1411.26	1297.84	1331.6	2819.63	1509.89	1346.9
CG17580	0	0	0	0	0	8.23045	0	0	0	0	2.74348	0
CG17593	1259.8	1525.21	1490.2	1428.07	1579.65	1687.02	1533.61	1157.56	1265.41	1425.07	1564.91	1318.86
CG17597	883.702	1419.33	1209.66	1419.54	1689.66	2051.72	316.953	296.478	299.754	1170.9	1720.31	304.395
CG17598	732.207	871.48	827.957	1005.22	1027.69	1179.73	363.636	300.418	294.671	810.548	1070.88	319.575
CG17599	182.39	204.403	171.069	174.139	184.535	205.328	86.0629	64.2261	73.86	185.954	188.001	74.7163
CG17625	0	2.34742	0	0	0	0	0	0	4.06504	0.782473	0	1.35501
CG17633	0	6.20155	6.97674	0	0.786164	3.14465	0	0	0	4.39276	1.31027	0
CG17636	0	0	1.16754	0	0.571755	0	0	0	0.584795	0.38918	0.190585	0.194932
CG1764	216.418	297.264	267.413	269.663	364.544	389.513	258.706	201.493	182.836	260.365	341.24	214.345
CG17648	0	0	0	0	0	0	0	0	0	0	0	0
CG17650	29.3333	29.3333	48	0	0	0	0	0	0	35.5555	0	0
CG17652	234.973	214.481	241.803	113.855	90.535	113.855	254.098	177.596	153.005	230.419	106.082	194.9
CG17658	0	0.69735	2.7894	9.21986	10.6383	14.1844	35.3107	23.3051	29.661	1.16225	11.3475	29.4256
CG17669	5.55556	5.55556	3.7037	2.47831	1.23916	0.619579	2.48293	1.8622	1.24146	4.93827	1.44568	1.8622
CG17672	6.69344	10.7095	13.3869	0	2.74348	0	1.34953	0	1.34953	10.2633	0.914493	0.899687
CG17680	1024.05	1312.71	1357.39	503.472	565.972	715.278	965.636	642.612	659.794	1231.38	594.907	756.014
CG17681	0	1.13766	2.27531	135.381	226.394	252.56	143.991	129.252	87.3016	1.13766	204.778	120.182
CG17683	1094.34	1353.6	1289.31	1400.98	1688.98	1969.32	4283.33	3346.53	3472.92	1245.75	1686.43	3700.93
CG17707	1.6835	5.38721	4.7138	0.337041	1.34816	2.02224	881.333	717.333	607.667	3.92817	1.23581	735.444
CG17717	11.5385	7.69231	8.97436	0	1.221	0	0	0	2.41546	9.40172	0.407	0.805153
CG17737	3587.88	5057.58	4806.06	4611.62	6284.4	7917.43	7375.76	5166.67	5400	4483.84	6271.15	5980.81
CG17738	9.09091	0	6.06061	0	0	10.929	0	0	0	5.05051	3.643	0
CG17754	309.378	471.967	453.109	188.361	397.141	406.33	73.9042	56.0652	44.3425	411.485	330.611	58.104
CG17760	19.83	22.6629	26.44	1.93611	7.74443	2.90416	0.944287	0.944287	0.944287	22.9776	4.1949	0.944287
CG17765	2599.66	2859.3	2673.37	818.951	1011.84	1157.36	1473.06	962.963	1023.57	2710.78	996.05	1153.2
CG17776	1319.05	823.81	747.619	724.638	792.271	884.058	676.19	428.571	514.286	963.493	800.322	539.682
CG17778	128.609	160.105	191.601	138.021	122.396	153.646	105.943	82.6873	100.775	160.105	138.021	96.4684
CG17780	0	0	0	0	1.0101	0	0	0	0	0	0.3367	0
CG17784	0	0	0	0	0	0	0	0	0	0	0	0
CG17819	0	5.37634	0	1.8018	1.8018	0	0	0	0	1.79211	1.2012	0
CG17829	150.607	171.306	206.281	70.4023	84.0517	71.1207	46.595	45.1613	53.0466	176.065	75.1916	48.2676
CG17834	1735.22	2141.06	2003.15	1091.5	1099.67	1296.57	2313.68	1895.44	1828.62	1959.81	1162.58	2012.58
CG17840	257.964	364.025	345.377	223.648	310.774	313.108	128.205	102.564	113.831	322.455	282.51	114.867
CG17843	242.15	278.986	260.87	256.318	266.546	285.8	236.637	240.24	247.447	260.669	269.555	241.441
CG1785	480.474	532.775	514.644	300.762	331.254	395.01	216.632	211.74	219.427	509.298	342.342	215.933
CG17855	12.5571	11.4155	9.13242	3.47222	1.15741	3.47222	0	0	1.1534	11.035	2.70062	0.384467
CG1789	507.736	473.98	490.858	244.928	353.623	407.246	320.233	209.607	225.619	490.858	335.266	251.82
CG17896	2170.51	2706.41	2623.08	995.504	1566.47	1847.78	615.385	581.41	657.051	2500	1469.92	617.949
CG17904	923.901	1067.52	979.636	370.968	550.538	616.129	469.453	322.615	327.974	990.352	512.545	373.347
CG17917	0	0	0	0	0	0	1.5083	1.5083	1.5083	0	0	1.5083
CG17919	18722.8	24577.6	22625.4	21960.3	25191.4	29810.3	17245.9	14214.5	14156.8	21975.3	25654	15205.7
CG17944	0	0	0	0	0	0	0	0	0	0	0	0
CG17959	0	2.25225	2.25225	0	0	0	0	0	0	1.5015	0	0
CG17982	281.285	345.515	323.367	207.265	316.239	325.855	75.1323	64.5503	60.3175	316.722	283.12	66.6667
CG17985	710.947	801.968	797.048	353.865	433.575	576.087	181.373	172.794	138.48	769.988	454.509	164.216
CG17994	16.5344	41.0053	34.3915	31.4342	32.0891	40.6025	40.4436	47.619	55.4468	30.6437	34.7086	47.8365
CG17996	649.718	646.893	545.198	250.712	324.786	339.031	200.565	149.718	194.915	613.936	304.843	181.733
CG18011	101.861	121.827	134.687	40.1484	44.5344	48.2456	121.12	113.023	114.372	119.458	44.3095	116.172
CG18031	5.95238	8.59788	8.59788	0	0	0.673401	1.34409	0	0	7.71605	0.224467	0.44803
CG18063	1.79211	2.68817	3.58423	0	0.896057	0	0.893655	1.78731	2.68097	2.68817	0.298686	1.78731
CG1809	11.6505	12.2977	10.356	0.648508	2.59403	2.59403	0	0.647249	0	11.4347	1.94552	0.21575
CG18095	0	0	0	5.9312	4.15184	2.9656	0	0	0	0	4.34955	0
CG1812	222.944	279.221	299.242	79.5207	123.638	145.969	113.612	106.645	121.115	267.136	116.376	113.791
CG18132	0	0	0	0	0	0	0	0	0	0	0	0
CG18135	1293.52	1675.34	1870.34	1071.06	1834.36	1848.67	576.52	407.757	393.082	1613.07	1584.7	459.12
CG18136	79.8742	90.566	96.8553	22.5061	31.6302	51.0949	6.91824	5.66038	3.77358	89.0985	35.0771	5.45073
CG18155	20.765	18.5792	20.2186	18.3435	19.4553	16.6759	9.96678	13.8427	9.96678	19.8543	18.1582	11.2588
CG18179	268.657	384.328	365.672	1079.11	1597.03	2034.61	457.249	306.072	228.005	339.552	1570.25	330.442
CG18190	0	9.4086	224.462	2.66667	45.3333	12	0	1.32802	18.5923	77.9569	20	6.64011
CG18268	65.1769	90.3166	61.4525	51.6432	54.4601	51.6432	94.518	70.8885	101.134	72.3153	52.5822	88.8468
CG18269	0	0	0	0	0	0	0	0	0	0	0	0
CG18273	159.526	214.96	204.551	88.515	126.311	148.988	80.8895	66.7155	70.3812	193.012	121.271	72.6621
CG18278	409.892	464.77	436.992	253.036	290.148	320.513	412.795	321.212	387.879	437.218	287.899	373.962
CG18292	444.84	628.707	564.65	234.875	320.285	379.597	109.929	82.7423	85.1064	546.066	311.586	92.5926
CG1835	24.1228	54.8246	39.4737	3.99202	0	1.99601	15.873	3.96825	3.96825	39.4737	1.99601	7.9365
CG18371	18.1818	15.1515	12.1212	0	0	5.55556	0	0	2.75482	15.1515	1.85185	0.918273
CG1840	649.718	610.169	553.672	1566.37	1162.24	1525.07	386.431	342.183	306.785	604.52	1417.89	345.133
CG18418	0	0	0	0	0	0	0	0	0	0	0	0
CG18446	2.73785	11.6359	65.7084	11.4943	18.2556	14.1988	2.63505	3.29381	1.31752	26.6941	14.6496	2.41546
CG18449	0	0	0	0	0	4.21941	4.16667	0	2.08333	0	1.40647	2.08333
CG18467	12.6582	15.4712	9.84529	4.21941	4.21941	2.81294	4.20168	0	0	12.6582	3.75059	1.40056
CG1847	321.637	416.179	388.889	172.414	215.256	262.278	102.083	104.167	118.75	375.568	216.649	108.333
CG18473	5.71429	12.381	4.7619	12.1723	5.61798	11.236	2.85714	1.90476	1.90476	7.61906	9.67543	2.22222
CG18480	0	0.606061	0.606061	0	1.26263	0	0	0	0	0.404041	0.420877	0
CG1850	0.978953	2.93686	1.46843	0	0	0	0.952381	0.47619	0.47619	1.79475	0	0.63492
CG18507	2390.4	3092.09	2752.27	937.58	1398.97	1732.95	891.026	755.128	843.59	2744.92	1356.5	829.915
CG18536	43.63	38.3944	57.5916	0	0	0	0	0	1.76367	46.5387	0	0.58789
CG18537	1.77305	0	0	0	1.7452	0	0	0	0	0.591017	0.581733	0
CG18539	0	0	0	0	0	3.90625	0	0	0	0	1.30208	0
CG18568	0.998004	0	2.99401	0	0	0	0.986193	0	0.986193	1.33067	0	0.657462
CG18577	0	0	2.92398	0	0	0	0	0	0	0.97466	0	0
CG18599	0	0	0	0	0	0	0	0	0	0	0	0
CG18609	0	2.53485	0	0	0	0	1.287	0	0	0.84495	0	0.429
CG18622	1929.08	2609.93	2524.82	372.76	415.771	408.602	702.128	542.553	489.362	2354.61	399.044	578.014
CG18624	7619.05	9380.95	9779.76	4874.25	5892.22	6886.23	2083.33	1327.38	1434.52	8926.59	5884.23	1615.08
CG18643	111.814	124.473	168.776	95.5414	91.2951	106.157	130.802	109.705	90.7173	135.021	97.6645	110.408
CG18661	264.264	259.76	208.709	187.5	214.744	248.397	103.801	65.7895	70.1754	244.244	216.88	79.922
CG18662	2.28311	18.2648	6.84932	4.5977	6.89655	13.7931	4.56621	0	0	9.13241	8.42912	1.52207
CG18666	0	0	2.62467	0	0	0	0	0	0	0.87489	0	0
CG18731	773.109	731.092	871.148	540.23	563.218	698.276	626.781	376.068	455.84	791.783	600.575	486.23
CG18766	865.801	1111.47	942.641	641.104	707.566	844.581	752.165	640.693	627.706	973.304	731.084	673.521
CG18808	6.06061	6.92641	4.329	0	1.73611	0.868056	0.865801	2.5974	0.865801	5.77201	0.868055	1.443
CG18810	0	0	0	2.15054	2.15054	1.07527	5.51876	3.31126	1.10375	0	1.79212	3.31126
CG18812	4832.72	6404.94	5842.59	5892.24	6579.63	7949.67	2825.31	2337.65	2270.37	5693.42	6807.18	2477.78
CG1885	300.842	436.823	401.925	477.053	892.512	1013.29	132.371	133.574	111.913	379.863	794.285	125.953
CG18858	1494.85	1557.4	1560.57	1436.56	1623.33	1788.81	878.571	738.889	776.19	1537.61	1616.23	797.883
CG18869	1.14351	2.28702	0.571755	4.02994	1.72712	4.60564	0.572738	0	0.572738	1.3341	3.45423	0.381825
CG1888	586.022	581.541	583.333	284.574	300.532	367.021	184.697	138.962	131.047	583.632	317.376	151.569
CG1890	584.848	757.576	724.242	960.245	1021.41	1125.38	787.879	412.121	542.424	688.889	1035.68	580.808
CG1902	1014.96	1383.55	1291.67	1681.67	1729.9	2068.6	731.838	588.675	510.684	1230.06	1826.72	610.399
CG1907	1663.51	2378.55	2156.68	1267.93	1564.35	1721.52	573.958	452.083	453.125	2066.25	1517.93	493.055
CG1909	415.842	522.002	497.25	142.615	152.801	170.345	88.5589	81.9582	83.6084	478.365	155.254	84.7085
CG1927	8726.13	10611.9	9912.36	6996.76	8373.79	9475.73	13663.5	11486.7	12017.2	9750.13	8282.09	12389.1
CG1943	2816.38	2971.75	3406.78	4737.89	4817.66	5475.78	1096.05	824.859	694.915	3064.97	5010.44	871.941
CG1951	292.615	442.715	408.782	245.509	256.687	313.373	175.837	159.091	151.515	381.371	271.856	162.148
CG1958	0	0	0	0	0	1.443	0	0	0	0	0.481	0
CG1968	724.339	830.688	770.37	272.92	285.639	304.187	432.804	358.73	366.667	775.132	287.582	386.067
CG1970	6751.42	8465.81	8054.13	3944.56	4749.11	5577.11	5559.57	4289.36	4673.05	7757.12	4756.93	4840.66
CG1971	261.09	267.427	231.939	10.3761	6.48508	6.48508	9.04393	5.16796	7.75194	253.485	7.78209	7.32128
CG1983	490.814	594.488	541.995	334.651	303.03	404.48	203.412	233.596	192.913	542.432	347.387	209.974
CG1986	0	0	0	0	0	0	0	0	0	0	0	0
CG1988	0	0	0	0	0	1.1396	0	0	0	0	0.379867	0
CG1998	649.425	884.236	747.126	1592.04	1806.8	2002.49	1146.4	1077.75	1038.88	760.262	1800.44	1087.68
CG2004	1049.41	1221.96	1289.41	1430.82	1286.95	1577.04	264.314	265.882	238.431	1186.93	1431.6	256.209
CG2006	62.1814	136.595	90.7238	123.457	105.967	117.284	118.974	112.821	109.744	96.5001	115.569	113.846
CG2021	354.386	301.754	280.702	308.511	234.043	354.61	400	294.737	270.175	312.281	299.055	321.637
CG2023	359.765	290.749	374.449	402.655	405.605	591.445	325.991	255.507	237.885	341.654	466.568	273.128
CG2025	284.22	326.94	325.777	297.504	348.605	405.58	317.516	280.316	301.699	312.312	350.563	299.844
CG2034	501.272	566.158	539.44	170.878	241.877	256.318	212.23	171.463	141.487	535.623	223.024	175.06
CG2051	455.967	470.782	516.049	357.261	420.792	469.472	562.706	413.366	471.122	480.933	415.842	482.398
CG2053	0	0	0	1.1534	5.76701	4.61361	0	2.29885	0	0	3.84467	0.766283
CG2059	1028.14	1231.6	1073.59	329.101	437.037	470.899	205.696	165.612	163.502	1111.11	412.346	178.27
CG2061	256.961	332.538	338.902	120.415	185.008	173.046	79.5545	75.5768	55.6881	309.467	159.49	70.2731
CG2063	637.949	788.718	762.051	211.558	194.014	235.294	340.535	256.173	222.222	729.573	213.622	272.977
CG2064	159.596	225.253	203.03	860.182	746.707	887.538	124.62	78.0142	74.9747	195.96	831.476	92.5363
CG2076	2734.12	4219.94	4257.09	1873.47	3135.71	3695.92	775.811	583.088	670.6	3737.05	2901.7	676.5
CG2107	872.064	987.006	934.033	790.29	864.865	1110.61	693.653	567.216	578.711	931.034	921.922	613.193
CG2111	0	1.79019	0	1.06952	0.713012	0.356506	0	0.717618	0.358809	0.59673	0.713013	0.358809
CG2113	0	0	0	0	0	0	0	0	0	0	0	0
CG2124	58.8235	95.3895	68.8924	72.9167	86.9792	95.8333	16.3761	9.50872	21.1305	74.3685	85.2431	15.6718
CG2129	118.996	129.749	118.996	96.2343	170.851	171.548	62.6305	57.0633	42.4495	122.58	146.211	54.0478
CG2135	464.529	564.626	554.422	1081.13	1426.2	1593.84	265.495	257.687	237.189	527.859	1367.06	253.457
CG2144	327.22	496.584	420.712	217.783	266.019	305.976	254.944	230.133	239.123	414.839	263.259	241.4
CG2145	3104.73	3628.38	3437.5	2799.89	3448.31	4412.38	1124.23	996.065	1030.92	3390.2	3553.53	1050.4
CG2150	1.77305	1.77305	3.5461	202.509	496.416	551.971	67.029	103.261	134.058	2.36407	416.965	101.449
CG2200	838.889	954.167	938.889	217.573	277.545	355.649	111.111	100	75	910.648	283.589	95.3703
CG2201	2957.53	4145.43	3770.91	1240.88	1444.65	1670.44	1369.11	1214.69	1166.35	3624.62	1451.99	1250.05
CG2224	291.27	322.222	341.27	317.092	382.831	474.091	197.619	161.111	168.254	318.254	391.338	175.661
CG2254	27019.8	33040.6	30371.9	10488.4	14054.3	17006.6	2827.59	2487.98	2597.7	30144.1	13849.8	2637.76
CG2263	619.813	825.971	764.391	501.006	745.137	818.913	407.631	321.954	325.301	736.725	688.352	351.629
CG2267	2.5641	0	0	0	0	0.884173	0	0	0	0.8547	0.294724	0
CG2291	0	0	0	0	0	0	0	0	0	0	0	0
CG2316	1885.39	3882.65	3610.05	1017.93	1571.49	1859.31	2490.58	1902.16	1781.35	3126.03	1482.91	2058.03
CG2321	36.2882	46.1379	53.3955	12.3839	10.8359	12.8999	46.0663	45.0311	31.0559	45.2739	12.0399	40.7178
CG2336	1.0352	0	0	0	0	1.03842	0	0	0	0.345067	0.34614	0
CG2444	17.5439	11.6959	2.92398	5.95238	17.8571	23.8095	0	0	0	10.7213	15.873	0
CG2453	476.19	482.835	518.272	195.946	248.874	306.306	201.093	172.678	134.426	492.432	250.375	169.399
CG2493	2118.6	2429.47	2146.67	1019.82	959.66	1396.32	1899.72	1444.21	1588.28	2231.58	1125.27	1644.07
CG2533	1.85185	1.85185	5.55556	0	7.36648	1.84162	0	0	0	3.08642	3.06937	0
CG2540	319.4	379.421	392.283	87.2766	120.925	160.883	158.12	136.752	118.59	363.701	123.028	137.821
CG2543	50.1166	94.9883	76.9231	14.6714	20.5399	21.7136	17.6367	16.4609	12.3457	74.0093	18.975	15.4811
CG2556	80.1418	101.418	129.787	44.733	83.6941	85.1371	41.4847	26.2009	29.8399	103.782	71.1881	32.5085
CG2574	0	0	0	0	0	0	0	0	0	0	0	0
CG2577	0	0	0	0	0	0.971817	0	0	0	0	0.323939	0
CG2604	12400.8	18317.1	16003.9	7174.05	8072.26	9544.68	6078.29	5261.24	5448.84	15573.9	8263.66	5596.12
CG2608	385.621	478.431	441.83	88.6243	105.82	133.598	126.482	94.8617	102.767	435.294	109.347	108.037
CG2611	123.737	143.939	184.343	351.01	381.313	393.939	105.263	85.213	87.7193	150.673	375.421	92.7318
CG2614	222.387	294.7	297.672	155.754	134.425	167.163	141.159	131.253	131.748	271.586	152.447	134.72
CG2617	75.4258	85.1582	75.4258	12.6263	16.4141	10.101	27.9805	25.5474	29.1971	78.6699	13.0471	27.575
CG2680	48.0874	24.0437	28.4153	54.8246	71.2719	73.4649	16.3934	10.929	10.929	33.5155	66.5205	12.7505
CG2681	5.32481	9.58466	8.5197	0	0	0	3.10559	0	2.07039	7.80972	0	1.72533
CG2685	245.169	292.271	292.874	110.911	131.894	136.091	79.2793	57.0571	71.4715	276.771	126.299	69.2693
CG2691	274.807	363.921	357.9	188.679	289.55	329.221	194.686	172.222	168.357	332.209	269.15	178.422
CG2701	515.646	779.138	675.283	274.273	360.179	412.081	161.778	157.778	156.889	656.689	348.844	158.815
CG2712	87.8244	117.764	133.067	47.8927	64.4955	68.3269	57.0513	39.1026	39.7436	112.885	60.2384	45.2992
CG2750	0.354233	1.0627	1.0627	0	0	0	0	0	0.177778	0.826544	0	0.0592593
CG2772	44.8718	48.0769	37.6603	0	0	0	0	0.813008	0.813008	43.5363	0	0.542005
CG2789	14612.6	19398.2	17450.5	7769.93	10576.1	12869.6	3385.59	2673.87	2445.05	17153.8	10405.2	2834.84
CG2794	169.048	235.238	214.286	60.5627	86.7907	85.36	63.8095	45.7143	57.1429	206.191	77.5711	55.5556
CG2807	642.537	797.512	750.746	526.97	563.261	663.684	416.294	363.636	408.594	730.265	584.638	396.175
CG2811	917.197	917.197	821.656	795.699	924.731	1010.75	290.043	186.147	196.97	885.35	910.393	224.387
CG2816	1071.43	1392.86	1230.16	44.1767	28.1124	32.1285	60.241	44.1767	8.03213	1231.48	34.8059	37.4833
CG2818	438.472	573.786	551.627	291.313	360.718	359.773	233.852	178.218	179.632	521.295	337.268	197.234
CG2837	32.6797	26.1438	18.3007	1.32275	1.32275	11.9048	0	0	0	25.7081	4.8501	0
CG2852	6305.69	7777.24	8234.15	8959.15	9380.72	11228.8	12040.7	9339.84	9408.13	7439.03	9856.22	10262.9
CG2854	1.35777	1.35777	0.678887	6	7.33333	10.6667	0.666667	0.666667	0	1.13148	8.00001	0.444445
CG2862	2864.44	3088.89	2984.44	1511.11	1626.67	1940	2466.67	1911.11	1822.22	2979.26	1692.59	2066.67
CG2875	237.425	293.763	301.811	96.1022	97.4462	118.952	59.6915	57.6794	69.0812	277.666	104.167	62.1507
CG2889	166.38	265.634	219.162	99.9422	150.202	162.334	52.9649	48.3592	48.3592	217.059	137.493	49.8944
CG2898	11.396	26.5907	39.886	3.85356	17.341	14.4509	4.80307	2.88184	1.92123	25.9576	11.8818	3.20205
CG2901	1.54083	0.513611	0	0	2.04499	0.511247	1.53139	1.02093	1.02093	0.684814	0.852079	1.19108
CG2906	119.152	146.199	146.93	65.9341	87.1795	90.1099	152.778	137.427	112.573	137.427	81.0745	134.259
CG2909	244.884	295.05	250.165	169.649	220.676	253.148	74.0741	49.1699	49.1699	263.366	214.491	57.4713
CG2911	316.94	329.69	315.118	78.6517	84.2697	63.6704	99.4475	71.8232	82.8729	320.583	75.5306	84.7145
CG2918	4128.21	4403.76	4321.05	4718.09	3956.85	4925.93	2501.79	2351.61	2354.12	4284.34	4533.62	2402.51
CG2921	343.096	393.305	388.424	172.557	216.909	225.918	345.238	278.711	296.919	374.942	205.128	306.956
CG2924	722.922	960.537	945.424	816.498	994.949	1114.48	951.301	789.253	817.8	876.294	975.309	852.785
CG2926	629.21	778.31	779.617	643.834	675.102	806.864	498.76	396.061	377.389	729.046	708.6	424.07
CG2931	384.106	452.539	430.464	259.868	290.57	293.86	254.386	212.719	206.14	422.37	281.433	224.415
CG2938	295.824	407.193	414.54	178.571	251.92	294.547	110.857	96.381	85.7143	372.519	241.679	97.6508
CG2964	0.601685	0	0	0	0	0	2.39808	0	0	0.200562	0	0.79936
CG2972	429.379	490.113	483.757	369.658	360.399	433.048	97.3703	92.3952	96.6596	467.75	387.702	95.475
CG2990	0.909091	1.81818	25.1515	3.03306	6.67273	8.18926	2.12121	2.12121	5.15152	9.29292	5.96502	3.13131
CG2991	1434.76	2134.64	1936.54	1108.14	1770.65	2017.23	709.371	611.507	591.34	1835.31	1632.01	637.406
CG30008	3.7594	20.0501	12.5313	5.03145	3.77358	15.0943	35.0877	21.3033	33.8346	12.1136	7.96644	30.0752
CG30015	1081.4	1417.92	1346.1	513.374	640.144	825.579	789.047	643.904	632.635	1281.81	659.699	688.529
CG30016	58.9971	26.5487	29.4985	0	0	2.97619	0	0	2.94985	38.3481	0.992063	0.983283
CG30022	3069.3	3489.84	3170.85	884.125	1295.48	1471.61	1635.6	1403.82	1340.5	3243.33	1217.07	1459.97
CG30033	10111.1	6833.33	6233.33	18850	15283.3	20938.9	11901.6	8125.68	5737.7	7725.92	18357.4	8588.33
CG30051	278.146	565.121	556.291	121.413	169.978	216.336	405.702	403.509	364.035	466.519	169.242	391.082
CG30053	54.7264	57.7114	46.7662	60.576	71.4995	71.4995	18.9055	11.9403	12.9353	53.068	67.8583	14.5937
CG30065	0	0	8.03213	4.01606	0	0	3.78788	0	0	2.67738	1.33869	1.26263
CG3008	733.002	975.677	838.032	450.465	484.948	576.355	721.858	577.596	672.131	848.904	503.923	657.195
CG30080	0	0	0	0	0	0	0	0	0	0	0	0
CG30083	16.7264	15.5317	13.1422	0	0	0	2.331	0	1.1655	15.1334	0	1.1655
CG30093	0	0	0	7.16846	7.16846	7.16846	0	0	0	0	7.16846	0
CG30096	63.9269	121.766	100.457	22.8898	41.4878	52.9328	116.006	60.2056	95.4479	95.3833	39.1035	90.5532
CG30098	29.0404	29.0404	27.7778	0	0	1.26743	0	0	0	28.6195	0.422477	0
CG30099	0	6.14439	4.60829	0	0	1.7094	0	0	0	3.58423	0.5698	0
CG30101	27.439	31.5041	31.5041	0.98912	6.92384	3.95648	21.8254	13.8889	9.92063	30.1491	3.95648	15.2116
CG30105	135.484	105.376	120.43	69.2641	95.2381	125.541	127.706	32.4675	34.632	120.43	96.6811	64.9352
CG3011	1309.75	1793.92	1632.53	460.64	645.756	740.467	120.541	130.381	136.531	1578.73	615.621	129.151
CG30118	4464.56	5332.63	5931.93	2698.51	3830.15	4315.64	1645.48	1352.4	1254.24	5243.04	3614.77	1417.37
CG30122	1012.85	1301.08	1298.45	1199.37	1400.05	1683.48	770.388	625.495	641.594	1204.13	1427.63	679.159
CG30148	147.849	126.344	163.978	24.3902	35.2304	35.2304	814.516	567.204	599.462	146.057	31.617	660.394
CG30152	923.547	1149.85	1081.04	528.274	596.726	669.643	547.84	391.975	475.309	1051.48	598.214	471.708
CG30154	182.292	88.5417	109.375	166.667	57.2917	156.25	1292.31	671.795	851.282	126.736	126.736	938.462
CG3016	507.168	658.901	652.927	249.097	394.103	435.018	100.3	104.505	89.4895	606.332	359.406	98.0982
CG30172	32.7381	65.4762	71.4286	0	12.012	12.012	17.8571	5.95238	0	56.5476	8.008	7.93649
CG30178	1.78253	1.78253	0	0	0	1.79211	1.78253	0	0	1.18835	0.59737	0.594177
CG30183	86.8167	109.753	123.687	71.3518	88.7599	100.365	68.4088	58.6361	58.2112	106.752	86.8256	61.752
CG30184	0	0	0	0	7.71605	6.17284	70.6605	56.8356	38.4025	0	4.62963	55.2995
CG30192	4.7619	0	0	0	0	0	0	0	0	1.5873	0	0
CG30197	28982.3	35421.8	30837.8	36011.9	40434.5	49151.8	33858.4	24935.1	22737.5	31747.3	41866.1	27177
CG3021	311.911	399.314	393.316	158.484	268.734	260.121	127.148	121.134	123.711	368.18	229.113	123.998
CG30222	0	1.79211	0.896057	0	0	0	0	0	0	0.896056	0	0
CG30268	0	0	0	0	0	0.53952	0	0	0.269687	0	0.17984	0.0898957
CG30275	0	0	0	0	0	0	0.256213	0	0	0	0	0.0854043
CG30291	1129.67	1349.05	1227.9	545.276	576.115	658.136	932.547	793.713	795.023	1235.54	593.176	840.428
CG3032	34.0294	67.2854	58.778	61.6706	61.6706	64.7931	39.7196	31.9315	36.6044	53.3643	62.7114	36.0852
CG30324	0	2.03252	2.03252	0	0	4.08998	2.03252	0	0	1.35501	1.36333	0.677507
CG30343	14.7493	35.3982	23.5988	0	0	6.00601	0	4.90196	0	24.5821	2.002	1.63399
CG30349	388.172	471.505	460.215	298.499	349.946	397.642	287.428	238.915	257.694	439.964	348.696	261.346
CG30350	0	0.903342	0	0	0	2.71739	0	0	0	0.301114	0.905797	0
CG30355	0	0	1.79211	0	0	0	0	0	0	0.59737	0	0
CG30357	80.5617	114.56	80.5617	0	0	0	42.8677	25.8684	24.3902	91.8945	0	31.0421
CG3036	4348.21	5074.37	5691.01	2785.38	2859.8	3236.54	612.63	515.625	541.016	5037.86	2960.57	556.424
CG30369	0	0	0	0	0	0	0	0	0	0	0	0
CG30373	1018.99	1145.57	1227.85	324.841	392.781	464.968	586.498	392.405	409.283	1130.8	394.197	462.729
CG30376	0	1.47493	0	0	0	4.08163	0	0	0	0.491643	1.36054	0
CG30377	9.29023	23.783	42.735	133.113	227.723	273.927	656.82	504.012	485.412	25.2694	211.588	548.748
CG3038	207.045	260.309	251.718	54.7009	65.812	64.1026	29.5359	22.7848	22.7848	239.691	61.5385	25.0352
CG30382	3784.15	4390.71	4336.07	2341.56	2696.84	3135.8	2240.44	1691.26	1976.78	4170.31	2724.73	1969.49
CG30383	1.31234	6.56168	7.87402	0	0	0	10.6242	6.64011	3.98406	5.24935	0	7.08279
CG30391	0	0	0	0	0	0	0	0.971817	0.971817	0	0	0.647878
CG30392	626.308	784.753	680.12	390.382	425.743	456.86	457.399	376.682	379.671	697.06	424.328	404.584
CG30398	0	0	0	809.179	1157	1397.34	0	0	0	0	1121.17	0
CG3040	606.443	690.476	697.479	490.858	623.066	734.177	361.345	309.524	310.924	664.799	616.034	327.264
CG30401	0	0	1.21212	0	0	0	0	0	0	0.40404	0	0
CG30411	1356.97	1706.86	1657.21	106.28	159.42	128.019	115.023	84.507	56.338	1573.68	131.24	85.2893
CG30412	0	2.21484	2.21484	0	0	1.0929	0	0	0	1.47656	0.3643	0
CG30413	0	0	0	0	0	0	0	0	0	0	0	0
CG30417	0	1.24378	0	0	0	0	0	0	0	0.414593	0	0
CG30423	2182.54	2708.99	2486.77	2061.16	2446.48	2899.08	2261.26	1777.78	1885.89	2459.43	2468.91	1974.98
CG30428	320.659	477.82	418.251	294.919	387.856	438.662	1001.23	696.296	762.963	405.577	373.812	820.163
CG30429	4.37158	0	0	0	0	1.09649	0	0	0	1.45719	0.365497	0
CG30431	27.9107	47.0494	53.429	22.49	23.2932	38.5542	12.8514	3.21285	1.60643	42.7964	28.1125	5.89023
CG30432	0	0	0	0	0	0	0	0	0	0	0	0
CG3045	72.8123	80.1603	100.868	52.8782	54.8862	72.9585	104.876	96.8604	94.8564	84.6135	60.241	98.8643
CG30479	0	12.4611	3.11526	0	0	0	0	0	0	5.19212	0	0
CG30487	0	0	0	0	0	0	0	0	0	0	0	0
CG30491	374.622	483.384	449.144	191.919	234.343	204.04	379.658	264.854	292.044	435.717	210.101	312.185
CG30495	1014.27	1087.67	997.961	344.581	343.558	347.648	156.983	142.712	136.595	1033.3	345.262	145.43
CG30503	522.158	554.913	520.231	2469.43	2619.33	3027.61	218.324	196.881	220.273	532.434	2705.46	211.826
CG3061	2643.24	3328.83	3142.34	3701.09	3853.26	4556.16	2828.5	2303.43	2385.22	3038.14	4036.84	2505.72
CG3062	0	2.6455	2.6455	0	0	0	2.60417	2.60417	0	1.76367	0	1.73611
CG3071	322.118	370.093	348.287	174.157	206.617	215.356	131.219	139.303	151.741	346.833	198.71	140.754
CG3077	392.638	549.08	524.54	461.774	440.367	485.219	360.772	315.041	313.008	488.753	462.453	329.607
CG3078	70.8838	88.3804	101.391	0	1.35135	0.900901	1.8018	0	2.25225	86.8851	0.75075	1.35135
CG3081	2.28702	4.57404	2.28702	1.17578	0.587889	0.587889	1.76367	0.587889	1.76367	3.04936	0.783853	1.37174
CG3088	537780	495175	493762	308239	405154	525042	202511	129076	124668	508906	412812	152085
CG3092	0	0	0	0	0	0	0	0	0	0	0	0
CG31007	5.68182	0	3.78788	1.82149	1.82149	0	1.91571	1.91571	3.83142	3.15657	1.21433	2.55428
CG31008	0	0	0	0	0	0	0	0	0	0	0	0
CG31016	0	0	0	0	0	0	0	0	0	0	0	0
CG3104	830.737	1596.05	1316.72	482.292	597.917	798.958	94.4964	75.8048	88.2658	1247.84	626.389	86.189
CG31041	6.73401	3.367	13.468	6.76819	1.69205	15.2284	0	1.67504	3.35008	7.85634	7.89621	1.67504
CG31050	0	0	0	0	0	0	0	0	0	0	0	0
CG31051	78.6164	69.1824	84.9057	39.6825	36.5079	76.1905	28.436	18.9573	18.9573	77.5682	50.7936	22.1169
CG3106	1.34771	1.34771	0.898473	0.896057	1.79211	0.448029	1.34409	1.79211	0.448029	1.19796	1.0454	1.19474
CG31068	0	0	0	0	0	0.447427	0	0	0	0	0.149142	0
CG31093	0	0	0	0	0	0	0	0	0	0	0	0
CG31125	34.1006	34.9531	41.7732	13.5708	18.6599	22.0526	12.6904	5.07614	12.6904	36.9423	18.0944	10.1523
CG31128	0	0	0	0	0	0	0	0	0	0	0	0
CG31142	333.333	251.613	277.419	155.844	149.351	229.437	458.599	316.348	343.949	287.455	178.211	372.965
CG31156	221.167	257.032	261.252	45.3901	62.0567	67.0213	110.046	71.7075	98.3316	246.484	58.156	93.3617
CG31157	0	0	0	0	0	0	10.3093	9.45017	11.1684	0	0	10.3093
CG31174	8.21018	8.21018	9.85222	0	1.57978	1.57978	68.5358	62.3053	54.5171	8.75753	1.05319	61.7861
CG31178	0	1.5361	0	0	0	0	0	1.51515	1.51515	0.512033	0	1.0101
CG3119	39.4366	57.277	45.0704	137.089	94.8357	123.005	274.345	271.536	208.801	47.2613	118.31	251.561
CG31200	11546.9	14192.5	12213.6	351.052	349.945	408.638	27.1444	14.1151	21.7155	12651	369.878	20.9917
CG31211	988.558	1262.78	1204.04	489.378	629.2	688.683	621.736	472.734	478.495	1151.79	602.42	524.322
CG31226	0	0	0	0	0	6.53595	0	0	0	0	2.17865	0
CG31235	0	0	1.64204	0	0	2.34742	0	0.823045	0	0.547347	0.782473	0.274348
CG3124	0	1.17786	0	0	0	7.27273	0	0	0	0.39262	2.42424	0
CG31248	1341.3	1755.64	1515.27	14.43	17.316	23.088	45.3333	25.3333	26.6667	1537.4	18.278	32.4444
CG31249	204	272	281.333	106.326	150.74	129.206	152.497	105.263	130.904	252.444	128.757	129.555
CG31251	114.379	98.0392	84.9673	20.6298	20.6298	19.544	182.9	132.035	141.775	99.1285	20.2679	152.237
CG31259	0	1.4652	0.732601	0	0	1.42653	0.732601	0.732601	0	0.7326	0.47551	0.488401
CG31275	0	0	0	0	0	0	0	0	0	0	0	0
CG31278	179.272	204.482	168.067	91.4205	74.5429	92.827	378.151	253.501	299.72	183.94	86.2635	310.457
CG31286	0	0	0	0	0	3.08642	0	1.56495	0	0	1.02881	0.52165
CG31287	4.5045	3.003	4.5045	1.5015	4.5045	3.003	7.50751	13.5135	9.00901	4.004	3.003	10.01
CG31301	608.2	822.323	797.267	405.425	462.61	505.865	362.702	314.978	341.41	742.597	457.967	339.697
CG31326	3501.92	4414.1	3879.49	2091.9	2134.32	2548.2	581.081	488.417	541.828	3931.84	2258.14	537.109
CG31337	12.8205	0	0	0	0	0	0	3.26797	0	4.2735	0	1.08932
CG31345	176.839	236.307	203.443	353.774	400.943	413.522	247.261	247.261	211.268	205.53	389.413	235.263
CG31357	631.98	796.108	776.65	621.713	810.008	1008.48	482.234	365.482	436.548	734.913	813.4	428.088
CG31380	4.11523	1.64609	0.823045	0.816993	0	1.63399	0	0	0	2.19479	0.816994	0
CG31381	60.0978	62.8931	64.2907	25.4777	36.8011	36.0934	31.0078	28.1889	28.1889	62.4272	32.7907	29.1285
CG31407	0	0	0	0	0	2.12314	0	0	0	0	0.707713	0
CG31437	1.25786	0	0	0	0	0	0	0	0	0.419287	0	0
CG31446	0	4.31034	0	0	0	0	0	0	0	1.43678	0	0
CG31463	0	0	0	0	0	1.7452	0	0	0	0	0.581733	0
CG31464	0	0	0	0	0	0	0	0	0	0	0	0
CG31468	0	0	0	0	0	0	0	0	0	0	0	0
CG31477	692.708	604.167	489.583	5.46448	0	10.929	0	0	0	595.486	5.46449	0
CG31482	3.4188	0	0	6.6335	0	8.29187	13.1363	4.92611	9.85222	1.1396	4.97512	9.30488
CG3149	467.026	654.676	612.71	613.814	833.033	879.88	348.921	281.175	299.76	578.137	775.576	309.952
CG31496	1.23916	3.71747	4.95663	1.19904	0	0	0	0	0	3.30442	0.39968	0
CG31522	7031.05	10273.1	9477.63	15052.1	16836.5	17664.8	6959.03	5265.36	4886.41	8927.26	16517.8	5703.6
CG31523	15629.9	17930.3	18396.4	31000	34304.1	37322.9	21193	17739.2	17631.8	17318.9	34209	18854.7
CG31528	0	0	0.968992	0	0	0.95511	0	0.95511	0	0.322997	0.31837	0.31837
CG31546	0	1.26263	3.78788	7.60456	13.9417	8.87199	1.26263	0	0	1.6835	10.1394	0.420877
CG31548	1625	1781.25	1718.75	291.503	414.379	461.438	296.875	203.125	244.792	1708.33	389.107	248.264
CG31550	860.577	1092.15	1008.81	315.144	364.571	390.273	399.206	315.873	373.413	987.179	356.663	362.831
CG31560	0	0	0	0	0	0	0	0	0	0	0	0
CG3160	166.667	230.272	236.395	230.037	274.55	320.761	247.794	213.17	231.84	211.111	275.116	230.935
CG31609	0	0	0	0	0	0	0	0	0	0	0	0
CG31612	27.6933	43.5664	40.8646	1.00908	0.672721	0	6.01805	3.00903	2.67469	37.3748	0.5606	3.90059
CG3163	240.036	273.551	309.783	246.181	229.111	280.323	333.333	245.471	227.355	274.457	251.872	268.72
CG31644	0	0	3.83142	0	0	7.24638	0	0	0	1.27714	2.41546	0
CG31646	68.2068	73.7074	74.8075	43.4543	48.9549	55.0055	85.5263	74.5614	66.3377	72.2406	49.1382	75.4751
CG31650	391.813	545.809	565.302	212.121	262.952	234.604	357.7	279.727	294.347	500.975	236.559	310.591
CG31673	1086.91	1313.91	1158.49	307.692	286.154	360	208.589	170.757	133.947	1186.44	317.949	171.098
CG31674	253.823	294.597	265.036	30.6122	20.4082	22.449	56.0652	65.2396	41.7941	271.152	24.4898	54.3663
CG31676	3761.01	5710.69	5457.02	3176.1	4373.17	4993.71	3561.84	2970.65	2861.64	4976.24	4180.99	3131.38
CG3168	556.435	771.097	716.245	465.201	551.02	537.415	242.424	247.649	226.75	681.259	517.879	238.941
CG31689	923.035	1082.93	1242.28	2508.01	2675.75	3180.02	1688.31	1438.85	1130.41	1082.75	2787.93	1419.19
CG31698	0	0	0	0	0	0	0	0	0	0	0	0
CG31706	52.2317	75.9734	46.5337	76.7736	100.097	133.139	44.5736	46.5116	67.8295	58.2463	103.337	52.9716
CG31708	10.6516	13.1579	10.0251	6.86642	9.3633	10.6117	13.7072	7.47664	8.72274	11.2782	8.94714	9.96886
CG31710	218.579	158.47	202.186	165.289	101.928	143.251	27.7778	19.4444	38.8889	193.078	136.823	28.7037
CG31728	79.2906	88.1586	92.8534	3.62882	12.4417	9.33126	0.520021	3.12012	2.08008	86.7675	8.46726	1.90674
CG31730	0	0	2.05761	0	0	0	0	0	0	0.68587	0	0
CG31743	8828.77	10667.7	10075	4522.36	5525.41	6203.25	2440.73	2283.69	2140.83	9857.16	5417.01	2288.42
CG31777	724.771	681.957	626.911	193.939	233.333	312.121	36.036	24.024	30.03	677.88	246.464	30.03
CG31778	1035.95	1127.45	1326.8	43.3333	53.3333	86.6667	36.3036	23.1023	19.802	1163.4	61.1111	26.4026
CG31784	0	0	0	0	0	0	0.877193	0	0	0	0	0.292398
CG31787	0	0	0	0	0	0	0	0	0	0	0	0
CG31788	0	0	0	0	0	5.74713	0	0	0	0	1.91571	0
CG31789	0	0	0	0	0	0	0	2.849	0	0	0	0.949667
CG31798	0	0	0.678887	2.04082	2.04082	2.04082	4.07332	3.39443	2.03666	0.226296	2.04082	3.16814
CG31803	5.9312	8.30368	5.9312	0	1.19048	1.19048	3.55872	4.74496	3.55872	6.72203	0.793653	3.95413
CG31812	28.6123	91.5594	75.8226	21.5517	53.1609	64.6552	146.377	101.449	68.1159	65.3314	46.4559	105.314
CG31816	0	0	0	6.94444	3.47222	0	6.87285	0	0	0	3.47222	2.29095
CG31819	0	0	0	0	0	0	0	0.662691	0	0	0	0.220897
CG31827	0	0	3.40136	12.0614	21.9298	27.4123	3.27869	1.0929	0	1.13379	20.4678	1.4572
CG31848	0	3.14465	0	0	0	0	0	0	1.52905	1.04822	0	0.509683
CG31849	21.2183	29.4319	28.063	2.04499	8.17996	9.54329	12.9252	14.966	17.0068	26.2377	6.58941	14.966
CG31851	0	0	1.63399	0	0	0	0	0	0	0.544663	0	0
CG31855	467.89	571.865	581.04	537.037	651.235	728.395	581.04	532.11	391.437	540.265	638.889	501.529
CG31862	0	0	0	0	1.84162	0	0	0	0	0	0.613873	0
CG31867	0	0	0	0	0	0	0	0	0	0	0	0
CG31869	353.496	438.438	382.239	256.739	364.57	460.847	173.593	149.351	141.126	391.391	360.719	154.69
CG31870	0	0	4.21941	0	0	0	0	0	0	1.40647	0	0
CG31871	2343.38	3257.38	2645.32	3040.8	3880.73	4652.86	48.9642	35.1538	46.4532	2748.69	3858.13	43.5237
CG31875	41.4079	33.1263	55.9006	0	0	0	4.41501	4.41501	0	43.4783	0	2.94334
CG31908	793.367	1136.9	1068.03	575.022	769.991	948.787	346.92	313.406	272.645	999.432	764.6	310.99
CG31910	0	1.27226	0	1.27226	0	1.27226	0	0	0	0.424087	0.848173	0
CG31913	9.30233	0	3.10078	0	0	4.69484	0	0	0	4.13437	1.56495	0
CG31917	812.362	986.755	1028.7	1040	1117.78	1160	836.645	706.402	682.119	942.606	1105.93	741.722
CG3192	4758.1	5689.52	5754.29	2785.44	3509.58	4599.62	2013.33	1344.76	1268.57	5400.64	3631.55	1542.22
CG31922	119.904	163.07	107.914	21.8978	36.4964	58.3942	367.15	260.87	212.56	130.296	38.9295	280.193
CG31928	0	0.797448	0	0	0.795545	0	0	0	0	0.265816	0.265182	0
CG31933	0	0	0	0	0	0	0	0	0	0	0	0
CG31937	1703.01	2447.56	2254.41	1101.04	1372.92	1573.96	1075.8	805.815	834.891	2134.99	1349.31	905.502
CG31949	0	0	0	0	0	0	0	0	0	0	0	0
CG31950	132.231	179.063	209.366	259.563	292.35	322.404	281.843	200.542	162.602	173.553	291.439	214.996
CG31957	226.415	318.658	306.08	489.583	441.667	431.25	300.207	204.969	246.377	283.718	454.167	250.518
CG31960	0	2.25225	0	0	0	2.54453	4.5045	9.00901	9.00901	0.75075	0.848177	7.50751
CG31961	443.192	474.178	430.986	566.197	582.16	668.545	354.869	305.243	299.625	449.452	605.634	319.912
CG31974	53.2688	63.7611	78.2889	16.1812	18.6084	33.9806	4.84262	3.22841	3.22841	65.1063	22.9234	3.76648
CG31975	0.801282	0.801282	0.801282	0	0	0	0	0	0	0.801282	0	0
CG31976	0	0	1.71821	0	0	0	0	0	0	0.572737	0	0
CG3198	636.225	805.175	812.785	228.526	272.656	334.121	187.257	145.299	156.177	751.395	278.434	162.911
CG3199	0	0	0	0	0	0	1.4556	0	0	0	0	0.4852
CG31997	15121.6	21747.7	20216.2	26582.8	38636.6	48576.3	32226.5	24316.2	22980.8	19028.5	37931.9	26507.8
CG31999	730.643	1199.2	1162.12	363.736	449.817	609.158	1458.29	1106.38	1012.02	1030.65	474.237	1192.23
CG32017	647.994	1375.52	1145.92	195.355	225.41	282.787	182.313	138.776	102.041	1056.48	234.517	141.043
CG32023	0	0	0	0	0	0	0	0	0	0	0	0
CG32032	878.788	1008.16	907.925	282.506	267.139	293.144	268.551	234.393	241.461	931.624	280.93	248.135
CG32036	0	3.85356	3.85356	33.7553	14.7679	33.7553	0	0	0	2.56904	27.4262	0
CG32037	193.122	149.471	226.19	2.65604	1.32802	0	0	0	0	189.594	1.32802	0
CG32039	1097.56	1065.04	1056.91	679.012	666.667	880.658	1272.36	1004.07	1126.02	1073.17	742.112	1134.15
CG32055	3.1211	9.3633	9.98752	0	0.625391	0.625391	16.2297	16.8539	10.6117	7.49064	0.416927	14.5651
CG32061	4.6729	0	0	0	0	0	0	0	0	1.55763	0	0
CG32068	3105.73	3069.89	3001.79	563.847	563.847	752.902	2127.24	1603.94	1688.17	3059.14	626.865	1806.45
CG32079	0	0	0	0	0	0	0	0	0	0	0	0
CG32091	553.772	765.115	598.181	569.223	578.807	635.783	564.593	544.923	453.482	639.023	594.604	520.999
CG32100	184.805	169.062	169.062	57.1625	50.2755	66.1157	64.5833	40.9722	52.7778	174.31	57.8512	52.7778
CG3213	0	0.493097	0	0	0	2.45821	0	0	0	0.164366	0.819403	0
CG32138	1469.43	1906.73	1761.9	1262.93	1661.86	1956.46	807.714	687.5	663.851	1712.69	1627.08	719.688
CG32141	5.60224	4.20168	1.40056	1.30719	0	1.30719	22.7577	25.4351	9.37082	3.73483	0.87146	19.1879
CG32148	0	0	0	0	0	0	0	0	0	0	0	0
CG3216	3.73241	10.623	7.75194	0	0	0.287604	1.72414	0.287356	0.287356	7.36912	0.095868	0.766284
CG32170	1834.57	2069.75	2069.75	1436.89	1416.67	1651.96	1031.05	891.001	897.338	1991.36	1501.84	939.796
CG32202	373.522	248.227	293.144	55.5556	55.5556	79.7101	328.537	247.002	297.362	304.964	63.6071	290.967
CG3222	4.39754	4.39754	0	1.75901	0	2.63852	4.38596	2.63158	1.75439	2.93169	1.46584	2.92398
CG32225	207.91	279.096	241.808	88.4354	95.2381	128.118	114.512	86.1678	100.907	242.938	103.93	100.529
CG3223	329.317	397.59	421.687	442.029	587.762	681.159	335.743	289.96	271.486	382.865	570.317	299.063
CG32230	13212.9	12526.1	10851.4	7674.8	7780.49	11004.1	14164.7	8249	7726.91	12196.8	8819.8	10046.9
CG32236	0	0	0	0	0	0	4.329	5.19481	6.06061	0	0	5.19481
CG32238	2.05339	4.10678	1.36893	0.690131	0	2.07039	3.43643	0.687285	2.06186	2.5097	0.920174	2.06186
CG3224	868.313	1098.77	1078.19	772.257	892.34	1099.38	514.403	395.062	403.292	1015.09	921.326	437.586
CG32240	0	0	0	0	0	0	0	0	0	0	0	0
CG3225	47.1976	59.9803	46.2144	20.1871	24.6184	25.1108	56.0472	45.2311	50.6391	51.1308	23.3054	50.6391
CG3226	1311.59	1165.22	1436.23	1276.81	1173.91	1340.58	787.879	597.403	685.426	1304.35	1263.77	690.236
CG32260	37.1014	33.6232	37.6812	17.5439	15.8461	27.7306	11.554	11.554	12.1317	36.1353	20.3735	11.7466
CG32266	0	0	0	0	4.329	0	0	0	0	0	1.443	0
CG32267	319.728	551.02	551.02	340.278	319.444	430.556	979.592	721.088	632.653	473.923	363.426	777.778
CG32276	6697.92	5666.67	5036.46	2748.72	933.333	1384.62	5859.38	4473.96	4114.58	5800.35	1688.89	4815.97
CG32295	0	0.931099	0	1.77305	0	0	1.76835	0.884173	0	0.310366	0.591017	0.884174
CG32298	0	0	0	0	0	0	0	3.52734	0	0	0	1.17578
CG32299	0	0	0	0	0	0	0	0	0	0	0	0
CG32302	0	0	0	0	1.05152	0	0	1.06838	0	0	0.350507	0.356127
CG32319	0	0	0	0	0	0	0	0	0	0	0	0
CG32335	2.07039	3.10559	3.10559	2.06612	0	0	0	1.0352	0	2.76052	0.688707	0.345067
CG32354	51.3595	69.9899	69.4864	47.1932	36.2643	69.5479	19.2878	17.8042	19.2878	63.6119	51.0018	18.7933
CG32364	195.652	298.551	240.58	0	0	0	0	0	0	244.928	0	0
CG3238	43.7406	74.4093	77.9286	9.04977	12.5691	11.0608	17.0683	16.5663	19.0763	65.3595	10.8932	17.5703
CG32395	0	0	0	0	0.893655	0.893655	0	0	0	0	0.59577	0
CG32425	561.806	712.5	733.333	157.601	219.665	228.731	163.535	140.571	144.746	669.213	201.999	149.617
CG32428	691.877	879.552	878.151	1487.63	1771.47	2064.05	1551.67	1231.44	1096.07	816.527	1774.38	1293.06
CG32441	2340.68	3254.04	2814.98	1377.78	1561.48	1859.26	2715.12	1994.13	2311.31	2803.23	1599.51	2340.19
CG32448	843.137	874.51	705.882	222.222	396.825	388.889	650.98	376.471	450.98	807.843	335.979	492.81
CG32459	5.6338	1.87793	1.87793	0	0	0.931099	0	0	0.952381	3.12989	0.310366	0.31746
CG32462	2.34742	0	1.17371	0	0	1.14548	0	0	0	1.17371	0.381827	0
CG32486	1378.64	1658.58	1703.88	1695.4	2058.29	2799.67	548.731	492.219	472.563	1580.37	2184.45	504.504
CG3251	0	0	0	0	0	0	0	0	0	0	0	0
CG32512	669.725	831.804	905.963	315.709	426.054	523.372	212.798	159.97	184.524	802.497	421.712	185.764
CG32521	8951.89	12396.9	11391.8	10843.9	14281.6	16820.2	2702.92	2387.27	2372.24	10913.5	13981.9	2487.48
CG32523	12321.9	12581.4	10571.2	118500	152486	178398	27593.2	17950.1	17660.1	11824.8	149795	21067.8
CG3253	27.4207	41.988	32.5621	11.0263	20.3562	21.2044	22.8758	25.3268	15.5229	33.9903	17.529	21.2418
CG32551	2323.72	2291.67	1750	5572.82	6495.15	6932.04	696.078	529.412	545.752	2121.8	6333.34	590.414
CG32554	108.787	99.0237	66.9456	46.7836	46.7836	52.6316	110.626	123.726	122.271	91.5854	48.7329	118.874
CG32564	0	2.44499	1.62999	10.6996	9.0535	12.3457	0	0	0	1.35833	10.6996	0
CG3257	251.305	453.393	382.55	132.02	177.972	177.972	46.5793	43.6681	48.7627	362.416	162.655	46.3367
CG32573	51.8707	73.1293	85.8844	50.0821	76.3547	82.9228	23.0769	23.0769	18.8034	70.2948	69.7865	21.6524
CG32579	366.477	473.485	494.318	85.7143	80	100	174.739	162.393	138.651	444.76	88.5714	158.594
CG32590	200.364	258.652	211.293	239.927	206.96	236.264	373.406	284.153	265.938	223.436	227.717	307.832
CG32591	5.10204	3.40136	7.65306	383.376	588.634	692.96	0.865801	0.865801	0	5.38549	554.99	0.577201
CG3262	949.943	1236.63	1167.24	1025.11	1275.11	1415.53	2327.65	1821.39	1728.1	1117.94	1238.58	1959.05
CG32631	0	0	0	0	0	0	0	0	0	0	0	0
CG32638	2251.57	3165.62	2436.06	1812.24	2244.73	2569.62	953.878	834.382	802.935	2617.75	2208.86	863.732
CG32639	23.4742	53.9906	35.2113	7.04225	0	7.04225	0	0	0	37.5587	4.69483	0
CG32641	6977.27	5780.3	5323.23	3190.48	2634.92	3153.44	1020.36	676.845	717.557	6026.93	2992.95	804.921
CG32643	0	0	0	0	0	2.89855	0	0	0	0	0.966183	0
CG32649	970.751	1340.39	1182.55	302.572	425.113	507.816	397.687	327.3	311.714	1164.56	411.834	345.567
CG32655	0	0	0	0	0	0	0	0	0	0	0	0
CG32668	112.785	166.86	145.23	86.9396	104.873	106.433	46.5827	46.9645	44.6735	141.625	99.4152	46.0736
CG32669	13.7969	15.4525	20.9713	6.68896	8.91862	9.47603	12.2019	5.54631	8.8741	16.7402	8.3612	8.8741
CG32687	229.001	301.503	331.565	1632.43	2144.14	2474.77	251.323	194.004	196.649	287.356	2083.78	213.992
CG32694	1282.71	2004.78	1826.17	410.577	540.385	545.192	413.725	299.02	267.647	1704.55	498.718	326.797
CG32695	54.8523	46.4135	84.3882	34.632	17.316	43.29	8.54701	0	0	61.8847	31.746	2.849
CG3270	8.33333	3.0303	1.51515	41.0023	56.1883	72.1336	5.30303	1.51515	2.27273	4.29293	56.4414	3.0303
CG32712	0	3.64299	1.82149	3.72439	1.8622	0	9.31099	14.8976	1.8622	1.82149	1.8622	8.69026
CG32720	5.95238	8.92857	5.95238	0	0	0	0	0	0	6.94444	0	0
CG32795	2269.6	3257.54	2860.47	3026.77	4418.83	4841.11	828.62	644.387	665.81	2795.87	4095.57	712.939
CG3281	231.103	240.397	236.059	89.3855	98.6965	112.973	47.2637	37.9353	37.3134	235.853	100.352	40.8375
CG32815	172.775	237.347	238.22	158.311	158.311	163.588	99.7375	78.7402	59.4926	216.114	160.07	79.3234
CG32816	631.393	777.778	744.268	35.0877	15.7895	21.9298	12.3131	7.03606	2.63852	717.813	24.269	7.32923
CG32832	0	0	0	2.39808	0	0	0	0	0	0	0.79936	0
CG32846	0.93633	0	0	0	0	0	0	0	0	0.31211	0	0
CG32850	1315.19	1981.86	2006.8	1033.78	1567.57	1781.53	3042.22	2106.67	2215.56	1767.95	1460.96	2454.82
CG32856	320.872	236.76	289.72	15.5763	40.4984	46.729	237.654	216.049	179.012	282.451	34.2679	210.905
CG3294	138.158	160.088	166.667	25.7542	27.2259	39.7351	43.573	43.573	47.2041	154.971	30.9051	44.7834
CG32945	0	0	0	0	2.03252	4.06504	0	1.78253	1.78253	0	2.03252	1.18835
CG3295	680.556	804.784	841.049	377.983	591.994	676.674	314.815	223.765	270.833	775.463	548.884	269.804
CG3301	1546.67	2054.67	1862.67	179.384	452.477	585.007	7116	6058.67	5401.33	1821.34	405.623	6192
CG3303	4459.63	7217.39	5772.26	396.93	538.377	653.509	394.41	330.228	357.143	5816.43	529.605	360.594
CG33051	259.084	263.823	244.866	44.2338	36.3349	37.9147	78.6164	33.0189	55.0314	255.924	39.4945	55.5556
CG33052	246.548	306.706	316.568	201.99	213.93	258.706	223.206	144.543	186.824	289.941	224.875	184.858
CG33056	1174.93	1519.92	1578.23	1082.85	1168.62	1470.76	789.116	620.019	626.822	1424.36	1240.74	678.652
CG3306	1002.31	979.167	900.463	565.167	532.872	700.115	60.9195	28.7356	29.8851	960.647	599.385	39.8467
CG33060	0	0	0	0	0	0	0	0	0	0	0	0
CG33080	3164.32	4086.49	3616.94	5426.35	6920.38	7463.63	3719.99	2952.33	3185.73	3622.58	6603.45	3286.02
CG3309	144.059	170.873	189.8	167.992	251.192	260.201	71.9577	60.8466	69.8413	168.244	226.462	67.5485
CG33098	0	0	0	0	0	0	0	0	0	0	0	0
CG33107	134.021	155.785	175.258	119.687	173.378	199.105	82.7664	69.161	63.4921	155.021	164.057	71.8065
CG33109	7.88288	10.1351	19.1441	13.4378	6.71892	14.5577	14.9425	12.6437	17.2414	12.3874	11.5715	14.9425
CG33110	463.897	662.71	649.852	4322.26	4699.9	4988.92	328.313	260.04	315.261	592.153	4670.36	301.205
CG33129	1127.52	1440.67	1433.78	1823.76	1952.38	2299.46	1512.25	1175.49	1076.96	1333.99	2025.2	1254.9
CG3313	156.137	179.375	174.292	131.732	179.039	192.868	72.6216	71.1692	53.0138	169.935	167.88	65.6015
CG33136	1.85185	0	0	0	0	0	0	1.99601	0	0.617283	0	0.665337
CG33155	677.778	777.778	744.444	368.421	565.789	638.158	888.889	794.444	622.222	733.333	524.123	768.518
CG33203	125.926	165.185	177.037	92.8463	111.872	117.199	39.3873	32.0934	25.5288	156.049	107.306	32.3365
CG3321	7921.81	10358	10296.3	4975	8066.67	10379.2	4156.38	2757.2	2670.78	9525.37	7806.96	3194.79
CG33213	84.0665	103.617	98.7292	85.7988	104.536	126.233	112.731	93.2945	72.8863	95.4709	105.523	92.9706
CG33233	0	0	0	0.68306	0	0.68306	0.680272	0	0	0	0.455373	0.226757
CG33257	0	0	0	0	0	0	0	0	0	0	0	0
CG33258	3.96825	3.96825	2.6455	0	1.32802	2.65604	0	0	0	3.52733	1.32802	0
CG3328	868.822	1272.43	1181.78	742.403	895.746	1054	384.833	339.239	340.657	1107.68	897.383	354.91
CG33298	302.131	388.047	395.957	363.119	398.379	487.078	353.575	293.289	302.75	362.045	416.192	316.538
CG33299	0	0	0	1.81159	0	0	0	0	0	0	0.603863	0
CG3330	5.78704	4.62963	3.47222	0	0	5.59284	1.06838	0	1.06838	4.62963	1.86428	0.712253
CG33301	3.276	15.561	17.199	5509.85	3612.48	3408.87	5.73301	1.638	3.276	12.012	4177.07	3.549
CG33303	2318.05	2764.92	2581.51	3314.73	3050.6	3554.32	3548.03	3161.57	3250.36	2554.83	3306.55	3319.99
CG33307	174.51	145.098	156.863	33.1384	66.2768	95.5166	87.2093	38.7597	40.6977	158.824	64.9773	55.5556
CG33325	0	0	0	0	0	0	0	0	0	0	0	0
CG33339	0	0	0	0	0	0	0	0	0	0	0	0
CG33340	4.36681	0	0	0	0	8.47458	0	0	0	1.4556	2.82486	0
CG33342	0	0	0	0	0	0	0	0	0	0	0	0
CG33346	0	0.915751	0	2.8169	6.57277	6.57277	0	1.87266	0	0.30525	5.32081	0.62422
CG3335	175.018	216.049	205.882	179.986	206.983	230.022	175.269	150.179	165.233	198.983	205.664	163.56
CG3338	404.735	480.646	476.888	175.084	205.387	244.669	251.121	221.599	224.963	454.09	208.38	232.561
CG3342	207.506	308.315	275.202	121.693	140.59	123.961	83.9054	81.6171	70.1754	263.674	128.748	78.566
CG3345	3.003	0.500501	1.5015	0	0.501253	1.50376	0	0	0.501253	1.66833	0.668338	0.167084
CG33470	10882	10422.8	9887.16	2110.68	1710.42	2395.11	3199.23	2424.01	2408.68	10397.3	2072.07	2677.31
CG3348	54.4218	105.442	98.6395	687.285	360.825	398.625	129.252	85.034	54.4218	86.1678	482.245	89.5693
CG3349	0	0	0	0	0	0	0	0	0	0	0	0
CG33506	303.125	373.958	355.208	172.414	265.413	259.143	283.333	223.958	271.875	344.097	232.323	259.722
CG33514	0	4.28725	4.28725	2.10084	5.2521	12.605	41.8006	32.1543	41.8006	2.85817	6.65265	38.5852
CG3353	236.641	260.39	269.72	135.204	152.211	189.626	232.143	188.776	197.279	255.584	159.014	206.066
CG33543	146.011	224.359	195.869	59.9572	78.5153	79.2291	32.7635	23.5043	34.188	188.746	72.5672	30.1519
CG3355	0	0	0	0	0	0	0	0	0	0	0	0
CG33631	0	0	0	1.73611	0	0	20.7254	3.45423	1.72712	0	0.578703	8.63558
CG33635	212.73	338.358	373.534	304.422	365.646	418.367	505.922	340.102	411.168	308.207	362.812	419.064
CG33645	0	0	0	9.68992	11.6279	5.81395	472.663	509.7	469.136	0	9.04392	483.833
CG33671	628.205	743.59	828.205	774.636	995.716	997.429	2240.17	1874.36	2101.71	733.333	922.594	2072.08
CG33673	0	0	0	0	0	0	0	0	0	0	0	0
CG33679	822.736	1728.32	1522.16	0	0	0	223.507	157.996	188.825	1357.74	0	190.109
CG33700	0	0	1.90476	0	0	0	0	0	0	0.63492	0	0
CG33704	0	0	0	0	0	0	0	0	0	0	0	0
CG33713	2454.05	3315.5	2960.22	732.782	1224.52	1385.67	462.277	371.742	393.69	2909.92	1114.32	409.236
CG33714	1948.15	2559.26	1974.07	636.704	644.195	816.479	996.296	844.444	888.889	2160.49	699.126	909.876
CG33722	571.13	732.915	700.139	155.136	203.354	235.5	225.244	167.364	172.245	668.061	197.997	188.284
CG33752	0	0	0	0	0	0	1.76991	0	0	0	0	0.58997
CG3376	1035.31	1412.9	1289.55	265.846	280.438	302.326	104.485	87.841	107.721	1245.92	282.87	100.016
CG33769	0	0	0	0	0	0	0	0	0	0	0	0
CG33772	0	0	0	0	0	0	0	0	0	0	0	0
CG33774	191.667	475	391.667	324.786	290.598	350.427	1225	933.333	733.333	352.778	321.937	963.889
CG33775	0	0	0	0	0	0	1.83824	1.83824	0	0	0	1.22549
CG33914	0	1.76367	0	137.993	146.953	184.588	7.05467	1.76367	7.05467	0.58789	156.511	5.291
CG33919	1.7452	13.9616	12.2164	0	0	0	0	0	0	9.30773	0	0
CG33920	0	0	0	129.524	228.571	308.571	0	1.87266	0	0	222.222	0.62422
CG33928	1.85185	7.40741	5.55556	0	0	0	5.61798	0	0	4.93827	0	1.87266
CG33946	1200	1675	1050	34.188	17.094	17.094	33.3333	8.33333	66.6667	1308.33	22.792	36.1111
CG33947	0	31.25	0	34.4828	0	34.4828	83.3333	20.8333	52.0833	10.4167	22.9885	52.0833
CG33969	400.813	599.187	525.203	336.609	443.079	537.265	426.108	322.66	330.87	508.401	438.984	359.879
CG33977	166.667	521.277	471.631	77.4648	274.648	383.803	734.043	638.298	531.915	386.525	245.305	634.752
CG33993	2.3753	1.58353	0.791766	1.59872	7.19424	5.59552	5.42636	2.32558	0.775194	1.58353	4.79616	2.84238
CG33998	0	0	0	0	0	0	2.77778	0	0	0	0	0.925927
CG34005	0	3.6036	1.8018	0	0	0	0	0	0	1.8018	0	0
CG34007	81.5603	95.7447	70.922	3.62319	0	0	248.227	209.22	195.035	82.7423	1.20773	217.494
CG34012	6.32911	0	0	2.12314	0	0	4.21941	0	0	2.1097	0.707713	1.40647
CG34015	383.693	395.683	402.878	1040.19	936.17	1174.94	504.695	443.662	408.451	394.085	1050.43	452.269
CG34021	0	0	0	0	2.08333	2.08333	0	0	0	0	1.38889	0
CG34025	0	13.3333	0	0	0	0	0	0	1.02564	4.44443	0	0.34188
CG34026	8.54701	8.54701	5.69801	0	0	2.87356	0	0	0	7.59734	0.957853	0
CG34029	0	0	0	0	0	0	0	0	0	0	0	0
CG34033	0	0	0	0	0	0	0	0	0	0	0	0
CG34038	1.23001	1.23001	0	0	0	0	2.46002	0	1.23001	0.820007	0	1.23001
CG34045	2.03252	4.06504	8.13008	2.23714	4.47427	0	6.13497	0	0	4.74255	2.23714	2.04499
CG3407	104.575	132.586	129.785	129.785	132.12	163.399	53.3141	60.5187	61.9597	122.315	141.768	58.5975
[truncated: 4,141 more rows]
