# Supplementary material for: Evolutionary shifts in taste coding in the fruit pest Drosophila suzukii
Source: eLife. 2021 Feb 22;10:e64317. doi: 10.7554/eLife.64317 (PMC7899650; doi:10.7554/eLife.64317)
Supplement: Supplementary file 3. — Log2FCs are described in the 3rd column, adjusted p-values in the 6th column, and whether a gene was considered a hit in all four differential expression (DE) analysis pipelines (‘yes’) or not (‘no’). [file elife-64317-supp3.xlsx]

## Sheet: Dsuz vs Dmel DESeq2
gene	baseMean	log2FoldChange	lfcSE	pvalue	padj	L2CF>=1 with all pipelines	L2CF>=2 with all pipelines
2020-09-01	639.895	0.835193	0.0930852	8.86358e-20	5.98292e-19	no	no
2020-09-05	40.949	-0.0380576	0.310263	0.888527	0.919308	no	no
140up	250.969	-0.257041	0.165371	0.106343	0.152456	no	no
26-29-p	11284.5	1.85886	0.0581673	1.32459e-225	1.91385e-223	yes	no
7B2	398.586	-0.730431	0.116129	1.30607e-10	5.0779e-10	no	no
a10	3.0453	0.261673	1.26839	0.497197	0.585926	no	no
a5	0.348142	-0.0827049	1.21486	0.820736	0.863032	no	no
AANATL2	10.1959	-1.44225	0.678433	0.00198097	0.00383151	yes	no
Aatf	438.233	-0.511029	0.125605	3.11619e-05	7.61041e-05	no	no
Aats-ala	2346.21	0.395459	0.0740073	7.21284e-08	2.26423e-07	no	no
Aats-ala-m	842.168	-0.21961	0.0900373	0.0136379	0.0232636	no	no
Aats-arg	1318.63	0.604773	0.0879566	3.44909e-12	1.47629e-11	no	no
Aats-asn	1624.12	0.111138	0.0749776	0.135247	0.189672	no	no
Aats-asp	1746.73	0.62413	0.0917459	5.50178e-12	2.32143e-11	no	no
Aats-gln	1098.97	-0.362973	0.0942391	9.59145e-05	0.000219597	no	no
Aats-gly	1474.43	-0.161085	0.0979435	0.0956076	0.139114	no	no
Aats-his	1736	0.925263	0.072446	5.3775e-38	7.74882e-37	no	no
Aats-leu	473.007	-0.875245	0.123065	3.05719e-13	1.40147e-12	no	no
Aats-lys	1388.54	0.859895	0.0802779	2.54529e-27	2.41689e-26	no	no
Aats-pro	153.438	-1.05017	0.182469	1.29555e-09	4.66397e-09	no	no
Aats-tyr	1226.19	0.0778871	0.084936	0.354397	0.44095	no	no
Aats-tyr-m	282.113	-1.29626	0.143394	1.1067e-20	7.79503e-20	yes	no
Aats-val	2880.22	1.02599	0.0937302	1.11564e-28	1.12959e-27	no	no
abo	410.366	0.499445	0.111106	4.69238e-06	1.24309e-05	no	no
ac	0	0	1.70566	NA	NA	no	no
Ac13E	3541.11	-0.706587	0.0768254	1.62473e-20	1.13689e-19	no	no
Ac3	143.098	-0.655185	0.187516	0.000228105	0.000498957	no	no
Acam	0.0939444	0.130477	1.23913	0.721831	NA	no	no
ACC	11601.7	-0.169387	0.0747962	0.0224801	0.0369326	no	no
Ace	1450.76	-0.468153	0.0983218	1.36899e-06	3.82173e-06	no	no
Acer	2871.59	1.90698	0.0853798	4.79787e-112	2.94821e-110	yes	no
achi	212.691	0.221719	0.161843	0.155387	0.215374	no	no
Ack	1576.56	-0.368611	0.0747762	6.72829e-07	1.93488e-06	no	no
Acn	1983.19	-0.236297	0.0845663	0.00477067	0.00875825	no	no
Acp26Ab	0.401244	0.317444	1.33357	0.415989	0.504967	no	no
Acp32CD	0	0	1.70566	NA	NA	no	no
Acp53C14b	0	0	1.70566	NA	NA	no	no
Acsl	12284.5	1.06319	0.0675149	1.00947e-56	2.49843e-55	no	no
Act42A	1790.94	2.14202	0.0786493	5.12076e-165	5.26454e-163	yes	no
Act57B	8488.39	-0.152553	0.234967	0.483393	0.573124	no	no
Act5C	21296.3	0.433191	0.0834043	1.54892e-07	4.74523e-07	no	no
Act79B	25.501	-0.603737	0.607328	0.128542	0.181232	no	no
Act87E	658.247	-0.206058	0.1935	0.261972	0.340837	no	no
Act88F	30.4895	0.595447	0.541414	0.116233	0.165262	no	no
Actn	3312.25	-0.252545	0.12595	0.040366	0.0634696	no	no
Ada	59.9831	-1.07707	0.286061	2.32229e-05	5.7344e-05	no	no
Ada2a	95.6799	-2.73005	0.233192	2.30952e-33	2.74982e-32	yes	yes
Adam	1536.43	0.0830232	0.111539	0.448976	0.538892	no	no
adat	53.9938	0.479454	0.295601	0.0664171	0.0997656	no	no
ade3	627.83	-0.878805	0.133691	1.29763e-11	5.35273e-11	no	no
AdenoK	933.105	0.132859	0.114061	0.235697	0.310736	no	no
Adgf-A	21731.9	0.386757	0.093908	3.03399e-05	7.41642e-05	no	no
Adgf-D	129.771	-0.456119	0.168143	0.00470792	0.008646	no	no
Adgf-E	0.0939444	0.130477	1.23913	0.721831	NA	no	no
Adh	6464.86	-0.473396	0.136119	0.000352298	0.000753053	no	no
Adhr	8.33161	-3.67058	1.12017	2.2155e-05	5.4859e-05	yes	yes
Adk3	263.912	0.0655232	0.158401	0.668549	0.739206	no	no
adp	545.005	-0.459312	0.106633	1.18869e-05	3.01457e-05	no	no
AdSL	538.437	0.716013	0.122677	2.26869e-09	8.01614e-09	no	no
AdSS	10612.6	0.27695	0.104701	0.00723016	0.0129056	no	no
Ady43A	441.426	1.06866	0.136059	5.62079e-16	3.05063e-15	no	no
aft	544.837	0.871796	0.1404	1.43315e-10	5.55594e-10	no	no
Afti	760.962	0.436369	0.104291	2.12998e-05	5.29375e-05	no	no
AGBE	2350.28	0.365977	0.102593	0.000293177	0.000631985	no	no
agt	163.118	-4.43081	0.324157	3.29071e-43	5.60259e-42	yes	yes
Ahcy13	903.254	-0.52428	0.143712	0.000168776	0.000374079	no	no
Ak6	186.221	0.519303	0.206651	0.00747518	0.0133119	no	no
Akh	1.70282	-0.205289	0.878003	0.597433	0.677243	no	no
AkhR	275.955	-1.71581	0.194792	4.28642e-20	2.93784e-19	yes	no
akirin	734.486	-0.605539	0.135965	4.63145e-06	1.22877e-05	no	no
al	15.1209	-1.69261	0.664781	0.000386461	0.000821478	yes	no
Ald	22329.1	0.697539	0.122993	6.32203e-09	2.16097e-08	no	no
Aldh	8028.08	-1.88874	0.0556243	3.01008e-254	5.95996e-252	yes	no
Alg10	363.59	-0.0580436	0.12308	0.630184	0.705394	no	no
alien	1068.66	-0.466306	0.0980366	1.40726e-06	3.92242e-06	no	no
ALiX	5515.59	0.742414	0.0822867	7.40424e-20	5.02961e-19	no	no
Alk	148.258	-0.287011	0.255766	0.218766	0.291771	no	no
AlkB	201.48	-0.292848	0.165312	0.0656501	0.09878	no	no
alph	1432.87	0.153037	0.0838754	0.0654317	0.0984791	no	no
alpha-Est10	3975.43	2.30795	0.16135	3.56578e-48	7.11293e-47	yes	yes
alpha-Est3	1711.13	0.996937	0.0852083	2.26956e-32	2.6262e-31	no	no
alpha-Est5	137.615	-0.122246	0.159412	0.427108	0.516822	no	no
alpha-Est7	8798.79	-0.287363	0.118578	0.0134475	0.0229756	no	no
alpha-Est8	2002.22	0.412562	0.0807263	2.48294e-07	7.43213e-07	no	no
alpha-Est9	480.17	-1.0986	0.102915	1.67976e-27	1.61221e-26	no	no
alpha4GT1	365.539	-1.19118	0.125546	2.21705e-22	1.70048e-21	yes	no
alphaCOP	6026.49	0.352739	0.0717718	7.38798e-07	2.12117e-06	no	no
alphaTub67C	67.0443	-0.141976	0.948542	0.711563	0.774597	no	no
alphaTub84B	15304.6	0.885099	0.0805672	1.16556e-28	1.1779e-27	no	no
alphaTub84D	1115.22	-0.647714	0.0849322	1.23208e-14	6.14351e-14	no	no
alphaTub85E	52.6028	0.90157	0.28043	0.000309549	0.000666471	no	no
alrm	9.99206	-0.0822205	0.479581	0.814127	0.858149	no	no
Als2	2738.48	0.577434	0.0966165	1.34429e-09	4.83292e-09	no	no
aly	0	0	1.70566	NA	NA	no	no
amd	2829.3	-1.11018	0.102226	2.16197e-28	2.14035e-27	no	no
amos	0	0	1.70566	NA	NA	no	no
Amph	9629	0.16482	0.0638011	0.00938125	0.0164272	no	no
Amun	2358.97	-0.140741	0.0725712	0.0507704	0.0782412	no	no
amx	272.334	0.483592	0.124976	7.51438e-05	0.000174433	no	no
Amy-p	146.38	1.97528	0.197079	2.9654e-25	2.57773e-24	yes	no
Amyrel	1.37609	-0.585317	1.1275	0.19864	0.267961	no	no
ana1	435.483	-1.59049	0.131612	5.22852e-35	6.73534e-34	yes	no
ana2	60.1433	0.524168	0.315768	0.0560751	0.0854797	no	no
ana3	107.959	-0.285302	0.280431	0.256127	0.334454	no	no
Andorra	0.0939444	0.130477	1.23913	0.721831	NA	no	no
angel	163.564	0.441112	0.158896	0.0039829	0.00736768	no	no
antdh	5004.06	4.96755	0.153514	1.90017e-230	2.98773e-228	yes	yes
AnxB10	3473.6	-0.961067	0.0807686	2.41465e-33	2.8686e-32	no	no
AnxB9	9412.01	0.0309229	0.0898696	0.727916	0.786944	no	no
aop	672.428	0.171427	0.127807	0.170103	0.233112	no	no
Aos1	451.699	-0.706533	0.102681	2.61412e-12	1.1234e-11	no	no
AP-1-2beta	3427.37	0.285677	0.0706824	4.6994e-05	0.000112256	no	no
AP-1gamma	3156.53	1.03028	0.0735208	2.04435e-45	3.67984e-44	no	no
AP-1mu	1024.96	-5.44464	0.677153	9.82742e-17	5.58314e-16	yes	yes
AP-2alpha	2246.6	0.646314	0.0663747	1.07379e-22	8.40477e-22	no	no
AP-2mu	1499.98	0.438958	0.0831792	9.78445e-08	3.05357e-07	no	no
AP-2sigma	754.232	0.22415	0.103714	0.0282537	0.0454405	no	no
APC4	248.591	0.000735788	0.131787	0.995438	1	no	no
aph-1	350.112	0.120583	0.12106	0.309482	0.392804	no	no
Aph-4	511.603	-0.514504	0.193922	0.00505562	0.00922435	no	no
Aplip1	180.484	0.133381	0.155192	0.374306	0.461814	no	no
APP-BP1	373.369	-0.0716279	0.120537	0.544399	0.627773	no	no
Aprt	225.76	-0.148376	0.143264	0.286703	0.369328	no	no
Aps	740.814	-0.141609	0.0949874	0.131195	0.184474	no	no
apt	154.515	-0.653539	0.163572	3.14639e-05	7.67715e-05	no	no
AQP	125.701	-0.119067	0.26441	0.619828	0.696739	no	no
aqrs	0.179496	0.0435748	1.21754	0.904239	NA	no	no
aralar1	2231.2	-0.818803	0.0827783	1.45858e-23	1.19047e-22	no	no
Arc1	16190.2	3.94447	0.0983265	0	0	yes	yes
Arc2	248.754	0.869644	0.150892	2.23129e-09	7.89966e-09	no	no
Arc42	1189.43	-0.984051	0.0822645	1.04577e-33	1.27933e-32	no	no
Arf102F	3101.32	0.510456	0.0994148	1.88218e-07	5.71712e-07	no	no
Arf51F	1057.51	-0.0349806	0.125711	0.776149	0.827047	no	no
Arf79F	7175.94	1.21789	0.0860506	1.53454e-46	2.82885e-45	no	no
ArfGAP1	1226.84	0.0280612	0.0717023	0.6935	0.759724	no	no
ArfGAP3	1819.44	0.344605	0.0819099	2.16268e-05	5.36755e-05	no	no
Arfip	427.272	0.363622	0.106731	0.000534824	0.00112168	no	no
Arfrp1	175.692	0.300708	0.153418	0.0427613	0.0670191	no	no
ari-2	432.952	0.108717	0.142124	0.431593	0.520599	no	no
Arl2	215.111	0.165132	0.136125	0.213314	0.285665	no	no
Arl6	99.1774	-0.494514	0.216194	0.0143674	0.0243911	no	no
armi	209.465	-0.69612	0.207683	0.000345385	0.000739459	no	no
Arp1	2543.55	0.611539	0.064146	8.44091e-22	6.31121e-21	no	no
Arp3	1132.52	0.404259	0.0785793	2.09623e-07	6.33491e-07	no	no
Arp5	278.103	-0.249634	0.128167	0.0462787	0.0719831	no	no
Arp53D	0.129688	0.130477	1.23913	0.721831	NA	no	no
Arp6	359.868	-1.4711	0.151449	1.289e-23	1.0569e-22	yes	no
Arp8	210.342	-0.397222	0.130864	0.00186483	0.00361864	no	no
Arpc2	1371.47	0.599192	0.100921	1.63388e-09	5.84654e-09	no	no
Arpc3A	264.477	0.618738	0.144956	1.04551e-05	2.66158e-05	no	no
Arpc3B	23.1628	-3.38368	0.592905	4.65606e-10	1.73943e-09	yes	yes
Arpc4	1444.14	1.06161	0.103284	1.2563e-25	1.11195e-24	no	no
Arpc5	281.794	0.150357	0.133273	0.247629	0.324467	no	no
Arr1	11.3342	0.359564	0.699958	0.36278	0.449773	no	no
Arr2	15.317	0.25551	0.837717	0.515309	0.601825	no	no
Ars2	3289.64	0.0270801	0.115962	0.811992	0.857041	no	no
Art1	581.179	0.251592	0.111622	0.0218219	0.0359285	no	no
Art2	1.75654	0.0655003	0.714463	0.862216	0.897121	no	no
Art4	97.9235	-0.202373	0.247266	0.372893	0.460496	no	no
Art7	309.227	0.100504	0.126942	0.418272	0.507624	no	no
Art8	100.952	-2.38748	0.262449	1.55739e-21	1.14838e-20	yes	yes
aru	2668.5	-0.752371	0.0887922	9.30437e-18	5.61413e-17	no	no
arx	62.2214	0.414772	0.283595	0.101314	0.145794	no	no
Asap	1516.98	0.119862	0.0706951	0.0877996	0.12895	no	no
asf1	296.671	0.760722	0.150006	1.47659e-07	4.53409e-07	no	no
asl	154.74	0.288102	0.190833	0.112091	0.159797	no	no
asp	42.8842	-0.382835	0.960344	0.354508	0.44095	no	no
asparagine-synthetase	529.751	-0.474644	0.331054	0.0947021	0.138025	no	no
asrij	496.665	0.424381	0.119558	0.000290345	0.000626893	no	no
AstA	0.828659	-0.248884	1.02085	0.529287	0.61339	no	no
AstA-R1	13.4906	-1.24982	0.615114	0.00380765	0.00706795	no	no
AstC	0	0	1.70566	NA	NA	no	no
AstC-R1	18.6604	-0.667674	0.453556	0.0553065	0.0843562	no	no
AstCC	0	0	1.70566	NA	NA	no	no
Asx	1276.16	-0.201027	0.0938526	0.0301436	0.0483057	no	no
Atac1	89.7384	-2.05051	0.249351	4.29619e-18	2.63388e-17	yes	no
Atac2	193.781	-0.33725	0.146484	0.0176283	0.0295611	no	no
ATbp	82.4534	0.344372	0.212203	0.0837123	0.123387	no	no
Atet	2052.88	0.897739	0.0767133	3.09518e-32	3.55846e-31	no	no
Atf-2	98.3603	-1.08312	0.211373	4.04321e-08	1.29276e-07	no	no
Atg12	120.979	-0.826299	0.225785	7.60226e-05	0.000176167	no	no
Atg16	401.177	-0.524378	0.105447	4.2782e-07	1.25185e-06	no	no
Atg17	2579.72	0.855347	0.0928724	9.3541e-21	6.60595e-20	no	no
Atg2	3253.42	0.108395	0.0688952	0.113289	0.161333	no	no
Atg3	724.148	0.0304191	0.078165	0.694747	0.760466	no	no
Atg4b	371.807	-0.990262	0.10672	3.11717e-21	2.25804e-20	no	no
Atg5	264.271	0.196864	0.126275	0.110982	0.158512	no	no
Atg6	622.087	-0.152378	0.0884041	0.0814612	0.120368	no	no
Atg8a	8709.73	0.985866	0.0800769	1.45347e-35	1.92333e-34	no	no
Atg8b	17.0856	0.641175	0.400064	0.0470423	0.0730858	no	no
Atg9	1220.48	-0.069378	0.113023	0.532193	0.615956	no	no
atilla	16734.5	0.629364	0.0767966	1.3321e-16	7.48048e-16	no	no
atk	5.26104	-0.567131	0.669746	0.164246	0.225838	no	no
atl	7379.49	1.00857	0.0772704	1.05154e-39	1.59703e-38	no	no
atms	639.57	0.653518	0.0958215	4.55798e-12	1.93235e-11	no	no
ato	0	0	1.70566	NA	NA	no	no
Atox1	486.572	0.570472	0.110772	1.54979e-07	4.74523e-07	no	no
ATP7	1752.48	-1.33042	0.0860592	4.18958e-55	9.9104e-54	yes	no
ATPCL	10064.5	1.03837	0.0636508	1.21764e-60	3.32118e-59	no	no
ATPsyn-beta	54666.5	0.611569	0.0618663	2.67728e-23	2.15553e-22	no	no
ATPsyn-Cf6	2840.34	0.0586893	0.122074	0.623658	0.700289	no	no
ATPsyn-d	5470.81	0.0798665	0.0690573	0.244391	0.320774	no	no
AttC	302.613	0.200536	0.621274	0.595437	0.675697	no	no
Atxn7	470.252	0.170087	0.107897	0.10918	0.156063	no	no
aurB	138.798	0.760963	0.359001	0.0114221	0.0197549	no	no
aux	2850.1	1.2573	0.0734657	8.95262e-67	2.76652e-65	no	no
ave	98.6257	0.345522	0.232181	0.108302	0.154933	no	no
Aven	126.039	-0.105756	0.171938	0.521772	0.606258	no	no
Axs	862.594	0.656932	0.098094	1.05733e-11	4.38178e-11	no	no
Axud1	679.2	0.34248	0.104791	0.000901621	0.00183412	no	no
az2	186.551	0.617778	0.154406	3.34239e-05	8.13311e-05	no	no
b	1355.35	-3.76735	0.141513	6.40721e-157	6.00929e-155	yes	yes
b6	1.23212	1.39093	1.76591	0.0347788	0.0551877	no	no
babos	349.121	1.32709	0.127072	1.02163e-26	9.46557e-26	yes	no
Bace	12.5597	-2.78981	2.29706	0.00462866	0.00852094	no	no
baf	424.32	0.289873	0.133756	0.0262633	0.0425466	no	no
ball	169.752	0.145816	0.171479	0.375859	0.463409	no	no
bam	8.98417	0.55144	0.684203	0.177546	0.242318	no	no
Bap170	764.904	-0.44653	0.0964796	2.71243e-06	7.3421e-06	no	no
bbc	1364.48	0.278655	0.113632	0.0125247	0.0215435	no	no
BBS8	119.838	-0.739902	0.181394	1.76406e-05	4.4234e-05	no	no
bc10	148.494	-0.339199	0.183279	0.0522787	0.080296	no	no
BCAS2	227.396	0.376945	0.131345	0.00326597	0.00614136	no	no
BCL7-like	43.9996	0.851563	0.318159	0.00200867	0.00388087	no	no
bcn92	99.8776	-0.812598	0.215862	5.24717e-05	0.000124562	no	no
Bdbt	209.578	-1.57812	0.166703	1.18942e-22	9.28267e-22	yes	no
bdg	1452.01	0.793808	0.0841045	1.314e-21	9.72946e-21	no	no
BEAF-32	343.693	-0.131771	0.123184	0.274723	0.355438	no	no
beg	314.458	0.217347	0.127249	0.0806637	0.119289	no	no
Bem46	297.787	0.634078	0.137743	2.14269e-06	5.84728e-06	no	no
ben	1405.3	-0.198841	0.0724317	0.00568903	0.0103167	no	no
Bet1	553.105	1.36966	0.0995394	2.61938e-44	4.59122e-43	yes	no
beta_COP	4341.8	0.507923	0.0730152	2.35191e-12	1.01561e-11	no	no
beta4GalNAcTB	272.493	0.704149	0.137666	1.36933e-07	4.21363e-07	no	no
beta4GalT7	219.91	0.503977	0.134992	0.000125423	0.000282678	no	no
betaCOP	6259.91	0.758485	0.0645268	2.58158e-32	2.98081e-31	no	no
betaggt-I	391.932	0.397922	0.106583	0.000147688	0.000330075	no	no
betaggt-II	344.631	-0.415865	0.119198	0.000369187	0.000786951	no	no
betaTub56D	13352.5	0.824901	0.0653493	5.00052e-37	6.96166e-36	no	no
betaTub60D	122.128	-1.13948	0.175194	8.76054e-12	3.65034e-11	no	no
betaTub97EF	1015.72	-0.0720548	0.0870473	0.402941	0.4908	no	no
BG642167	0.251214	-0.191991	1.25492	0.607295	NA	no	no
BHD	171.499	-0.289809	0.148785	0.0445041	0.069506	no	no
BI-1	3658.34	0.294226	0.101831	0.0033707	0.00631829	no	no
bic	6092.63	0.801263	0.0603866	1.1959e-40	1.86393e-39	no	no
BicC	182.8	-0.203976	0.867802	0.599461	0.679242	no	no
BigH1	39.3314	-0.301887	1.00032	0.453571	0.54331	no	no
Bin1	192.888	0.432634	0.142772	0.00180242	0.00350646	no	no
bin3	1321.86	0.162711	0.0899585	0.0674018	0.101103	no	no
bip1	139.789	1.34661	0.178458	2.83092e-15	1.46506e-14	yes	no
Bka	133.602	-0.647914	0.165846	4.61212e-05	0.000110319	no	no
Blos1	120.243	-2.06489	0.233686	2.13579e-20	1.48865e-19	yes	no
Blos2	233.511	0.435232	0.158643	0.00443865	0.00818243	no	no
Blos4	138.189	-0.139566	0.203109	0.46695	0.55622	no	no
blot	2879.74	-0.605678	0.0765928	1.46856e-15	7.71969e-15	no	no
blp	214.564	-0.275051	0.143133	0.0479767	0.0742784	no	no
blue	1076.74	0.364097	0.0808825	5.52596e-06	1.44742e-05	no	no
blw	30087.2	0.235069	0.107931	0.026862	0.0434244	no	no
BM-40-SPARC	1180.88	-0.0152292	0.0855069	0.857239	0.89316	no	no
bnk	0	0	1.70566	NA	NA	no	no
BobA	0.171371	0	1.21477	1	NA	no	no
boi	83.1157	0.217926	0.25386	0.347716	0.433914	no	no
bond	298.193	-0.980349	0.160014	1.69225e-10	6.5367e-10	no	no
bonsai	447.847	-1.02796	0.117042	2.55349e-19	1.67496e-18	no	no
bora	8.98086	-0.859185	1.04368	0.0818317	0.120815	no	no
bou	740.119	0.0158924	0.141802	0.908285	0.933967	no	no
bowl	1522.33	0.286537	0.0812835	0.000373733	0.000796006	no	no
Brd	0.358059	-0.247573	1.28345	0.515298	0.601825	no	no
brk	300.443	-0.705539	0.142769	3.35746e-07	9.92753e-07	no	no
Brms1	292.758	-0.210193	0.108667	0.0492763	0.0761362	no	no
brn	95.5248	0.103327	0.221008	0.616978	0.694831	no	no
Bro	0.129688	0.130477	1.23913	0.721831	NA	no	no
bru	1267.8	0.0415697	0.070562	0.553089	0.636696	no	no
brv1	0.0716119	-0.0417889	1.21731	0.908135	NA	no	no
BRWD3	2159.27	0.329649	0.0649608	3.30848e-07	9.79354e-07	no	no
bsf	2700.63	-1.24487	0.0887722	8.96961e-46	1.63101e-44	yes	no
Bsg25A	0	0	1.70566	NA	NA	no	no
Bsg25D	1210.71	-0.263886	0.086333	0.00201116	0.00388427	no	no
bsh	0.0716119	-0.0417889	1.21731	0.908135	NA	no	no
Btd	4.4046	-0.453957	0.793799	0.271277	0.351234	no	no
Bteb2	0	0	1.70566	NA	NA	no	no
btn	1.1344	-0.0734169	0.965453	0.846648	0.884365	no	no
btv	697.25	-0.0318403	0.0979205	0.741817	0.797777	no	no
Bub3	403.518	0.233492	0.104911	0.023826	0.0389523	no	no
Buffy	1885.08	1.18707	0.084706	1.20631e-45	2.18607e-44	no	no
Bug22	275.655	-0.648539	0.13681	1.06426e-06	2.99766e-06	no	no
bur	1295.11	-0.390318	0.06716	4.92915e-09	1.6957e-08	no	no
Burs	0	0	1.70566	NA	NA	no	no
bw	1.33195	-1.09216	1.41379	0.0564653	0.0860009	no	no
Bx42	1136.11	0.335191	0.107571	0.00153752	0.00302413	no	no
by	3507.73	0.300998	0.0548136	3.49686e-08	1.1221e-07	no	no
bys	422.86	0.116285	0.117668	0.313841	0.397393	no	no
Bzd	332.023	0.643004	0.106949	9.35789e-10	3.4125e-09	no	no
c-cup	0	0	1.70566	NA	NA	no	no
c11.1	3462.94	1.28875	0.0887237	5.9334e-49	1.21069e-47	no	no
c12.1	526.342	1.2431	0.130976	1.85333e-22	1.42355e-21	no	no
C1GalTA	469.537	-0.899809	0.122403	4.85101e-14	2.34057e-13	no	no
Ca-P60A	38783.6	0.64863	0.122641	6.1787e-08	1.95221e-07	no	no
CaBP1	4566.02	1.55959	0.153	9.01059e-26	8.02844e-25	yes	no
cactin	670.715	0.751486	0.109738	2.91277e-12	1.24973e-11	no	no
cad	13.0042	-0.271345	1.03912	0.496206	0.585073	no	no
CadN2	6.50784	0.106496	0.611048	0.775565	0.826754	no	no
Caf1-180	299.236	0.367967	0.212749	0.0651325	0.098084	no	no
cag	164.137	-0.488548	0.152364	0.00090806	0.00184651	no	no
CAH1	13487.4	0.0616512	0.130554	0.628827	0.704216	no	no
CalpA	4640.92	-0.152079	0.066856	0.0220949	0.0363556	no	no
CalpB	2575.2	0.567938	0.0818395	2.37271e-12	1.02294e-11	no	no
CalpC	186.785	-4.56174	0.243104	3.18312e-79	1.22424e-77	yes	yes
Cals	10043.2	-0.0626182	0.254367	0.787778	0.837103	no	no
calypso	167.114	-0.0872249	0.155059	0.560968	0.644239	no	no
CanB	100.131	-0.361589	0.210935	0.0678705	0.101777	no	no
CanB2	906.943	-0.186725	0.0841868	0.0251055	0.0408566	no	no
Cand1	2534.5	0.277918	0.0790355	0.000389275	0.000827132	no	no
Caper	2237.05	-0.300328	0.0755665	6.16532e-05	0.000144878	no	no
Capr	1998.83	0.0190884	0.071224	0.787264	0.836722	no	no
capt	3641.17	-0.091435	0.078952	0.242798	0.319076	no	no
car	364.824	0.538322	0.14035	7.81842e-05	0.000180628	no	no
Cas	1169.24	0.314602	0.112923	0.00456062	0.00839857	no	no
casp	1481.17	-0.151148	0.0748332	0.0418114	0.0655879	no	no
Cat	17801.9	0.0501305	0.0668658	0.450667	0.540436	no	no
cathD	16687.7	0.282504	0.0687166	3.49698e-05	8.48223e-05	no	no
cato	0	0	1.70566	NA	NA	no	no
Catsup	2437.4	0.542409	0.0891538	7.40669e-10	2.72701e-09	no	no
cbc	355.644	0.354035	0.117038	0.00203921	0.00393275	no	no
Cbp53E	186.18	-0.73796	0.175222	9.96931e-06	2.54275e-05	no	no
Cbp80	1170.4	-0.0498331	0.0772926	0.515686	0.601933	no	no
Cbs	793.72	1.02499	0.110545	2.95358e-21	2.14245e-20	no	no
Cby	19.2465	0.192459	0.356794	0.519877	0.604582	no	no
CCAP	0.166762	0.0435748	1.21754	0.904239	NA	no	no
CCHa1	12.1765	-0.737036	0.496913	0.0449857	0.0701352	no	no
CCHa2	43.7951	-0.383002	0.330061	0.176771	0.241384	no	no
Cchl	1541.07	0.506646	0.107741	1.71717e-06	4.73929e-06	no	no
Ccm3	1094.34	-1.0937	0.0861239	7.62142e-38	1.08942e-36	no	no
Ccs	381.441	-0.142137	0.142628	0.305426	0.389134	no	no
Cct5	2248.91	0.334664	0.0723543	3.16541e-06	8.52078e-06	no	no
Ccz1	420.632	-0.311999	0.126115	0.0114056	0.0197329	no	no
Cda9	0.815866	-0.699996	1.33052	0.149947	0.208429	no	no
cdc14	1537.88	-0.255654	0.0871591	0.00303258	0.00573071	no	no
Cdc16	173.335	-0.826062	0.153117	2.11855e-08	6.92283e-08	no	no
Cdc23	146.702	-1.40639	0.16702	2.06684e-18	1.28183e-17	yes	no
cdc2rk	149.47	-1.44085	0.189418	1.44838e-15	7.62112e-15	yes	no
Cdc42	1347.91	0.325838	0.0789557	3.13571e-05	7.65457e-05	no	no
CDC45L	189.718	0.303603	0.195372	0.101074	0.145487	no	no
Cdc5	519.509	-0.389448	0.0992334	6.87921e-05	0.000160525	no	no
CdGAPr	1440.5	-0.0279495	0.0716501	0.69445	0.760297	no	no
Cdk1	132.288	-0.536242	0.66548	0.185176	0.251895	no	no
Cdk12	1803.39	0.249951	0.065006	0.000109849	0.000249895	no	no
Cdk4	416.387	-0.547486	0.111309	5.41379e-07	1.57209e-06	no	no
Cdk5alpha	440.981	-0.105214	0.100905	0.290355	0.373403	no	no
CdsA	1710.46	-0.130796	0.0781896	0.0916253	0.134016	no	no
CecB	1.95994	0.067337	0.808477	0.858858	0.894231	no	no
CecC	31.1957	3.19346	0.612751	5.36372e-09	1.84165e-08	yes	yes
Ced-12	770.24	0.287732	0.0821581	0.000407032	0.000862121	no	no
ced-6	14538.2	0.500275	0.0622907	6.59798e-16	3.54857e-15	no	no
Cen	1391.28	0.463349	0.0960318	1.00529e-06	2.84353e-06	no	no
CenB1A	2359.92	0.96297	0.0765733	5.74791e-37	7.9607e-36	no	no
Cep89	0.864291	0.624005	1.21234	0.181051	0.246724	no	no
cer	620.567	0.679826	0.153033	4.09503e-06	1.09078e-05	no	no
cert	1129.27	0.959804	0.08213	3.02939e-32	3.49033e-31	no	no
CG10005	1.56538	0.551702	1.06124	0.215861	0.288463	no	no
CG10014	0.358991	0.0493175	1.20923	0.892113	0.922305	no	no
CG10026	504.663	-1.02713	0.13917	2.54108e-14	1.24629e-13	no	no
CG10029	0.14443	-0.115492	1.2298	0.752373	NA	no	no
CG10031	464.165	-0.904815	0.149184	3.1913e-10	1.20655e-09	no	no
CG10035	9.94779	-0.838381	0.626072	0.0432294	0.0676534	no	no
CG10050	36.2259	0.195168	0.292564	0.452421	0.542175	no	no
CG10051	5.24761	-2.75601	1.52771	0.00137891	0.00273126	no	no
CG10053	143.521	0.133995	0.213394	0.50368	0.591796	no	no
CG10063	5.11022	1.22195	1.18028	0.0308853	0.0494646	no	no
CG10068	686.288	-0.0254763	0.0936025	0.782971	0.832987	no	no
CG10075	398.029	-0.565329	0.113763	4.03108e-07	1.18342e-06	no	no
CG10077	7584.93	-0.477777	0.0842437	9.98581e-09	3.35749e-08	no	no
CG10098	526.159	0.141003	0.0921277	0.121511	0.172307	no	no
CG10104	0	0	1.70566	NA	NA	no	no
CG10116	1.25975	-1.21368	1.66006	0.0481363	0.0745039	no	no
CG10126	1403.6	-1.28695	0.167556	1.15178e-15	6.09644e-15	yes	no
CG10131	22.7135	-3.02474	0.556909	1.35656e-09	4.87379e-09	yes	yes
CG10133	128.533	-0.438846	0.17918	0.0103049	0.0179564	no	no
CG10139	251.236	0.171388	0.151847	0.243929	0.320404	no	no
CG10147	148.503	-0.67333	0.176305	6.18969e-05	0.000145387	no	no
CG10163	0.83124	-0.391098	1.19504	0.34943	0.435646	no	no
CG10164	0.0939444	0.130477	1.23913	0.721831	NA	no	no
CG10171	185.959	1.32052	0.216629	7.39066e-11	2.9159e-10	yes	no
CG10176	2557.5	0.101071	0.09937	0.302558	0.386309	no	no
CG10177	0.072818	-0.0417889	1.21731	0.908135	NA	no	no
CG10178	191.17	-0.819048	0.15447	3.60823e-08	1.15645e-07	no	no
CG10184	79.512	-0.942076	0.204291	8.5144e-07	2.43542e-06	no	no
CG10188	795.27	0.364132	0.0995948	0.000208721	0.000458621	no	no
CG10189	152.014	-1.58406	0.192055	6.51027e-18	3.94602e-17	yes	no
CG10195	255.769	-0.64417	0.141448	2.64596e-06	7.16944e-06	no	no
CG10202	1.54542	0.36067	0.892664	0.37601	0.463489	no	no
CG10205	14115.3	-1.43721	0.114524	2.07854e-37	2.93189e-36	yes	no
CG10208	128.627	0.570175	0.191337	0.00165217	0.00323417	no	no
CG10211	14470.2	-2.72344	0.145174	3.17028e-80	1.22814e-78	yes	yes
CG10214	106.63	-2.04922	0.21402	2.26084e-23	1.82575e-22	yes	no
CG10217	3302.66	-0.430414	0.0675038	1.3762e-10	5.34289e-10	no	no
CG10219	1896.74	-0.476408	0.100296	1.42983e-06	3.98325e-06	no	no
CG10253	107.337	-0.698936	0.187127	8.10453e-05	0.000186995	no	no
CG10257	122.829	-0.58439	0.190749	0.00121868	0.00243371	no	no
CG10262	176.512	1.39403	0.170904	1.94575e-17	1.14812e-16	yes	no
CG10264	0.23958	-0.0291512	1.2118	0.935903	NA	no	no
CG10265	63.8038	-1.27408	0.276614	3.21458e-07	9.52613e-07	no	no
CG10286	646.711	0.528236	0.108841	7.8151e-07	2.24019e-06	no	no
CG10289	1959.96	-0.341055	0.0837754	3.92596e-05	9.43713e-05	no	no
CG10306	1944.58	0.364747	0.077161	1.86606e-06	5.13166e-06	no	no
CG10307	188.598	-0.867558	0.176618	2.43865e-07	7.30776e-07	no	no
CG10311	462.464	-0.531818	0.144568	0.000147758	0.000330094	no	no
CG10320	909.202	-0.632503	0.129947	5.86834e-07	1.69671e-06	no	no
CG10324	235.22	0.900139	0.154874	1.51434e-09	5.42242e-09	no	no
CG10326	460.169	-0.573645	0.110661	1.28542e-07	3.96529e-07	no	no
CG10333	835.782	-0.44202	0.141035	0.00125574	0.00250305	no	no
CG10336	31.4017	0.680315	0.445301	0.048562	0.0751412	no	no
CG10337	266.224	1.78996	0.181719	2.12964e-24	1.78729e-23	yes	no
CG10339	1225.9	-0.217668	0.118076	0.0601835	0.0911448	no	no
CG10343	238.897	0.391753	0.162428	0.0122558	0.0211014	no	no
CG10344	111.501	-1.10768	0.210865	1.87221e-08	6.15172e-08	no	no
CG10348	98.1911	-2.74674	0.254453	7.33853e-29	7.47272e-28	yes	yes
CG10352	21.0109	-6.57982	1.23033	2.73819e-09	9.58636e-09	yes	yes
CG10353	2181	0.367547	0.0620531	2.58874e-09	9.0929e-09	no	no
CG10362	166.717	0.326089	0.166453	0.0416256	0.065354	no	no
CG10365	607.73	0.208309	0.129149	0.0988094	0.142766	no	no
CG10366	294.953	-0.106485	0.124987	0.384069	0.471791	no	no
CG10375	428.027	-0.0967759	0.107003	0.358245	0.444946	no	no
CG10376	514.297	0.0115193	0.111488	0.916303	0.940221	no	no
CG10383	806.117	-0.606303	0.114493	6.5564e-08	2.06544e-07	no	no
CG10396	2.73528	-3.06728	1.9078	0.00188856	0.00366203	no	no
CG10399	94.0383	-1.27255	0.216291	3.08973e-10	1.17064e-09	no	no
CG10407	23.3235	-2.15041	0.5568	2.04818e-06	5.60653e-06	yes	yes
CG1041	2035.84	-0.610634	0.0845773	2.87993e-13	1.32269e-12	no	no
CG10413	3719.27	-0.498757	0.079468	2.369e-10	9.05264e-10	no	no
CG10418	71.9777	-0.927481	0.281082	0.000212682	0.000466557	no	no
CG10425	547.64	0.96248	0.093822	2.17226e-25	1.89754e-24	no	no
CG10426	184.394	-0.0895588	0.150982	0.540517	0.623701	no	no
CG10428	120.448	-1.91031	0.197885	1.25812e-23	1.03317e-22	yes	no
CG10431	119.26	0.505426	0.191693	0.00539785	0.00982196	no	no
CG10435	499.722	-0.244668	0.0918801	0.00705196	0.0126128	no	no
CG10444	524.911	-1.56719	0.107377	1.28682e-49	2.68725e-48	yes	no
CG10463	132.582	-1.17965	0.205709	9.77671e-10	3.55795e-09	no	no
CG10465	1478.19	0.858038	0.146176	1.22496e-09	4.43073e-09	no	no
CG10466	106.916	0.905386	0.220735	9.76758e-06	2.49606e-05	no	no
CG10470	604.381	0.238527	0.173501	0.151663	0.210595	no	no
CG10479	258.994	0.391423	0.215054	0.0518873	0.0798243	no	no
CG10505	110.973	1.37069	0.447155	0.00014043	0.000314249	no	no
CG10508	488.309	-4.43252	0.159504	1.33613e-170	1.51978e-168	yes	yes
CG10510	0.775404	-0.443229	1.14803	0.301329	0.3852	no	no
CG10527	7543.86	-0.639654	0.0733655	1.46555e-18	9.18504e-18	no	no
CG10561	405.062	-0.252976	0.110113	0.0194608	0.0323902	no	no
CG10565	1533.78	-0.369122	0.0791513	2.53337e-06	6.87831e-06	no	no
CG10566	94.8984	-0.493907	0.193784	0.00709707	0.012685	no	no
CG10570	4141.78	-1.29931	0.13828	3.95266e-22	3.00155e-21	yes	no
CG10576	2567.44	0.295381	0.0614532	1.35052e-06	3.77411e-06	no	no
CG10581	33.5303	-1.26339	0.328111	9.67675e-06	2.47521e-05	no	no
CG10584	172.849	-0.75002	0.164226	1.89238e-06	5.20137e-06	no	no
CG10589	0	0	1.70566	NA	NA	no	no
CG10590	1875.35	1.02831	0.090294	7.62327e-31	8.23313e-30	no	no
CG10591	1.76788	-0.0815862	0.917673	0.83003	0.869896	no	no
CG10592	57.521	-0.634991	1.00778	0.163516	0.224951	no	no
CG10616	999.405	0.304596	0.0901346	0.000630352	0.00131276	no	no
CG10621	180.8	1.69507	0.192615	4.7373e-20	3.23857e-19	yes	no
CG10623	608.655	-0.942861	0.109186	1.25512e-18	7.89394e-18	no	no
CG10628	188.88	-1.19268	0.150959	2.61864e-16	1.4492e-15	no	no
CG10635	319.492	-1.25957	0.166676	3.22981e-15	1.66988e-14	no	no
CG10639	607.252	0.17715	0.101397	0.0763876	0.113404	no	no
CG10654	16.5822	-1.64819	0.577131	0.000158337	0.000352255	no	no
CG10659	0	0	1.70566	NA	NA	no	no
CG10660	307.68	-0.0222248	0.124083	0.854859	0.891548	no	no
CG10671	1501.68	0.144604	0.0788427	0.0643419	0.0970028	no	no
CG10674	619.547	0.69541	0.135845	1.36986e-07	4.21363e-07	no	no
CG10694	0	0	1.70566	NA	NA	no	no
CG10702	146.951	0.679936	0.182929	9.1429e-05	0.000209687	no	no
CG10710	66.9972	-2.55248	0.335609	4.82901e-16	2.63427e-15	yes	yes
CG10713	14.7579	-0.144256	0.384627	0.645285	0.718986	no	no
CG10725	0.978748	0.906987	1.58689	0.0920416	0.134515	no	no
CG10731	150.508	0.0581878	0.167665	0.718323	0.78052	no	no
CG10738	17.0024	-1.82659	0.544131	2.09881e-05	5.22115e-05	no	no
CG1074	288.874	-0.766662	0.117632	2.65882e-11	1.07438e-10	no	no
CG10747	899.898	-1.1247	0.0996564	1.77937e-30	1.89115e-29	no	no
CG10748	0	0	1.70566	NA	NA	no	no
CG10749	0.171371	0	1.21477	1	NA	no	no
CG10750	0.0939444	0.130477	1.23913	0.721831	NA	no	no
CG10754	517.224	0.0499131	0.0914886	0.58106	0.663041	no	no
CG10761	0.166762	0.0435748	1.21754	0.904239	NA	no	no
CG1077	4.68665	-1.17275	1.383	0.0448807	0.0700123	no	no
CG10777	1206.16	0.806307	0.13271	4.07359e-10	1.52717e-09	no	no
CG10778	309.884	0.429942	0.115626	0.000149946	0.000334423	no	no
CG10799	217.797	2.71367	0.18479	1.55656e-50	3.31528e-49	yes	yes
CG10802	473.939	0.286934	0.115645	0.0114665	0.0198252	no	no
CG10809	150.579	-0.013402	0.154159	0.928436	0.948484	no	no
CG10814	29.2039	0.4285	0.445231	0.20984	0.281365	no	no
CG10822	0	0	1.70566	NA	NA	no	no
CG10834	0.072818	-0.0417889	1.21731	0.908135	NA	no	no
CG10839	0	0	1.70566	NA	NA	no	no
CG10841	3.41201	-0.847708	0.859057	0.0688811	0.103128	no	no
CG10859	2.52265	0.0723021	0.693675	0.847952	0.885208	no	no
CG10864	15.7265	0.0383395	0.400574	0.904837	0.931317	no	no
CG10869	2.25371	-2.78711	2.05466	0.00368169	0.00685079	no	no
CG10898	198.423	0.0742505	0.146395	0.601447	0.681071	no	no
CG10899	0.506108	-0.315492	1.31149	0.421683	0.511067	no	no
CG10903	268.795	0.39626	0.127757	0.00149712	0.00294791	no	no
CG10904	171.101	-1.24468	0.180454	4.33926e-13	1.96924e-12	no	no
CG10907	271.922	0.383706	0.154683	0.0102605	0.0178964	no	no
CG1091	912.117	-0.501773	0.0876647	7.06257e-09	2.40641e-08	no	no
CG10912	7.81447	0.247467	0.63419	0.516244	0.602059	no	no
CG10914	135.305	-0.990438	0.169865	1.0063e-09	3.65717e-09	no	no
CG10915	525.893	-0.180039	0.132746	0.164624	0.226299	no	no
CG10919	0.668741	-0.0856331	0.907348	0.821806	0.863647	no	no
CG1092	56.0499	-0.383171	0.280509	0.126965	0.179242	no	no
CG10920	0	0	1.70566	NA	NA	no	no
CG10932	947.472	0.143778	0.0975639	0.135415	0.189809	no	no
CG10933	196.716	0.386195	0.176666	0.0222733	0.0366154	no	no
CG10936	398.438	-2.66584	0.146576	1.18868e-75	4.3229e-74	yes	yes
CG10947	436.437	0.396404	0.199068	0.0350951	0.0556326	no	no
CG10949	127.029	-2.50585	0.210943	2.51445e-34	3.14807e-33	yes	yes
CG10950	1.47941	-1.5249	1.79332	0.0270494	0.0436744	no	no
CG10962	36.1645	-1.00238	0.356989	0.000868321	0.00176907	no	no
CG10970	2.09286	0.795627	1.10091	0.10455	0.150128	no	no
CG10979	1228.19	0.546936	0.0868864	1.92936e-10	7.42039e-10	no	no
CG10996	1.78363	-0.0921828	0.756485	0.807806	0.853296	no	no
CG11007	194.501	-1.01933	0.164955	1.06544e-10	4.16666e-10	no	no
CG11018	0	0	1.70566	NA	NA	no	no
CG1103	292.53	-0.0680916	0.141699	0.621346	0.697839	no	no
CG11030	256.007	-0.660904	0.143081	1.86386e-06	5.12826e-06	no	no
CG11034	296.299	-1.04377	0.154913	2.45274e-12	1.05659e-11	no	no
CG11035	306.027	0.102749	0.148194	0.474873	0.564149	no	no
CG11041	5.63927	1.18227	0.86369	0.01828	0.0305964	no	no
CG11044	82.142	-1.33388	0.257946	1.5475e-08	5.11621e-08	no	no
CG1105	2439.74	0.567217	0.0978674	4.09021e-09	1.41164e-08	no	no
CG11050	4131.21	0.643743	0.0763259	1.72045e-17	1.02081e-16	no	no
CG11052	0.0898009	-0.0417889	1.21731	0.908135	NA	no	no
CG11068	1.61897	0.185565	0.757654	0.629104	0.704333	no	no
CG11069	694.344	-1.89892	0.133476	1.76076e-47	3.4354e-46	yes	no
CG11070	2107.8	0.27264	0.07978	0.000564848	0.00118187	no	no
CG11073	17951.1	0.465267	0.065867	1.16973e-12	5.15957e-12	no	no
CG11077	178.394	-2.25867	0.191323	6.55848e-34	8.09738e-33	yes	yes
CG11089	339.343	0.213345	0.142097	0.122574	0.17363	no	no
CG11095	185.288	0.955467	0.151736	6.2221e-11	2.46761e-10	no	no
CG11099	132.221	-0.451653	0.17875	0.00813476	0.0143906	no	no
CG11107	1330.32	0.0229179	0.0791578	0.770281	0.822433	no	no
CG11110	78.99	0.709711	0.214864	0.000396287	0.000841363	no	no
CG11123	294.81	-0.00644816	0.149284	0.96448	0.97876	no	no
CG11125	73.9652	-2.75056	0.277007	6.23777e-25	5.31852e-24	yes	yes
CG11127	319.923	-2.71305	0.179577	2.78017e-53	6.27122e-52	yes	yes
CG11131	0.309431	0	1.21477	1	1	no	no
CG11134	228.456	-0.911904	0.159285	2.44216e-09	8.60632e-09	no	no
CG11137	1145.94	-0.857916	0.113235	1.00572e-14	5.02955e-14	no	no
CG11141	506.227	-0.564569	0.0952919	1.89369e-09	6.74012e-09	no	no
CG11145	0.0939444	0.130477	1.23913	0.721831	NA	no	no
CG11147	9879.13	-0.154651	0.0875458	0.0742244	0.110377	no	no
CG11148	5687.49	-0.0784843	0.0845323	0.348468	0.434651	no	no
CG11151	4205.48	-0.0556204	0.137204	0.677432	0.746865	no	no
CG11158	326.031	-0.2768	0.136854	0.037862	0.0597257	no	no
CG11162	0	0	1.70566	NA	NA	no	no
CG11164	38.539	0.438302	0.282984	0.0827707	0.122053	no	no
CG11168	760.618	-0.268154	0.0857612	0.0015828	0.00310634	no	no
CG11170	92.7609	-0.0763885	0.188839	0.670941	0.741085	no	no
CG11178	346.259	0.22018	0.104472	0.0323793	0.0516561	no	no
CG11190	918.249	-0.908671	0.103018	2.74041e-19	1.79318e-18	no	no
CG11191	278.782	-0.919122	0.12943	2.86224e-13	1.31569e-12	no	no
CG11192	0	0	1.70566	NA	NA	no	no
CG11200	2304.34	-0.214899	0.0895671	0.0152613	0.0257942	no	no
CG11208	1537.86	0.619066	0.0801839	6.30077e-15	3.20799e-14	no	no
CG11210	3318.48	0.722519	0.0697244	1.56223e-25	1.37137e-24	no	no
CG11221	21.3267	-0.429265	0.363949	0.156736	0.217018	no	no
CG11226	1.17081	-0.416534	1.02641	0.322782	0.406787	no	no
CG11236	37.6408	-3.03317	0.411267	4.7654e-15	2.44256e-14	yes	yes
CG1124	14020.4	-1.47435	0.0944543	3.085e-56	7.53079e-55	yes	no
CG11241	201.761	-1.60921	0.190151	1.01777e-18	6.42387e-18	yes	no
CG11247	415.88	-1.05464	0.136388	1.54529e-15	8.11505e-15	no	no
CG11248	451.846	0.685707	0.115302	1.25825e-09	4.54499e-09	no	no
CG11249	1.67151	0.894251	1.26007	0.0866891	0.127459	no	no
CG11251	0	0	1.70566	NA	NA	no	no
CG11257	177.604	-1.41648	0.161716	1.06261e-19	7.15458e-19	yes	no
CG11267	597.635	0.767208	0.138213	1.04766e-08	3.51147e-08	no	no
CG11269	0	0	1.70566	NA	NA	no	no
CG11275	2033.13	0.222269	0.1387	0.0997804	0.143936	no	no
CG11279	129.437	-0.674381	0.214868	0.000766605	0.00157686	no	no
CG11289	3.19702	-3.91749	1.74315	0.000333887	0.000715989	no	no
CG11298	0.403375	0.151043	1.18559	0.687574	0.755244	no	no
CG11307	408.045	0.661253	0.117712	9.45841e-09	3.18618e-08	no	no
CG11309	1783.06	0.100869	0.0924396	0.269582	0.349209	no	no
CG11318	0.939789	0.176826	0.969684	0.647845	0.720937	no	no
CG11320	1.06134	-0.154716	0.858912	0.687043	0.75497	no	no
CG11333	0.0939444	0.130477	1.23913	0.721831	NA	no	no
CG11340	0.500121	0.0524111	1.0545	0.889365	0.919998	no	no
CG11342	40.6216	-1.78746	0.40382	2.6574e-07	7.94102e-07	yes	no
CG1136	368.041	0.32413	0.102974	0.00139731	0.00276462	no	no
CG11368	29949.2	0.327643	0.0864497	0.00012801	0.000287902	no	no
CG11369	0	0	1.70566	NA	NA	no	no
CG11373	0	0	1.70566	NA	NA	no	no
CG11377	813.443	-0.326128	0.115367	0.00396949	0.00734796	no	no
CG11378	1617.64	2.0818	0.0864821	1.09154e-129	8.10469e-128	yes	no
CG11379	0	0	1.70566	NA	NA	no	no
CG11382	0.966555	-0.43866	1.23313	0.304489	0.388126	no	no
CG11384	0.345052	0.0557268	1.0992	0.881745	0.914238	no	no
CG1139	13.9563	-2.78718	0.640675	2.38637e-07	7.16312e-07	yes	yes
CG11391	30.8152	-2.81578	0.689554	7.71562e-07	2.21286e-06	yes	yes
CG11399	614.126	-0.137817	0.11983	0.24078	0.316813	no	no
CG11400	638.416	1.74436	0.133864	2.78399e-40	4.26454e-39	yes	no
CG11403	122.308	-1.42291	0.247172	4.61434e-10	1.72505e-09	no	no
CG11404	0	0	1.70566	NA	NA	no	no
CG11407	8446.04	-15.4424	1.16323	1.97596e-42	3.2503e-41	yes	yes
CG11409	94.9333	-3.45673	0.327071	3.2784e-27	3.09653e-26	yes	yes
CG11412	543.136	-0.609045	0.109003	1.26873e-08	4.21805e-08	no	no
CG11413	1.57335	-1.12607	1.45852	0.0533921	0.0817395	no	no
CG11414	1273.87	-0.277567	0.0686341	4.68295e-05	0.000111913	no	no
CG11417	260.155	-1.10799	0.144437	2.09864e-15	1.09564e-14	no	no
CG11425	427.985	-2.3356	0.133619	3.46473e-70	1.14336e-68	yes	yes
CG11426	860.599	1.41566	0.140142	2.93432e-25	2.55486e-24	yes	no
CG11436	115.302	-0.795775	0.171278	1.13571e-06	3.18715e-06	no	no
CG11437	14.5435	-2.82449	0.710991	1.22806e-06	3.44089e-06	yes	yes
CG11444	1159.51	0.802812	0.0896631	1.16035e-19	7.79302e-19	no	no
CG11447	144.115	-1.75694	0.181864	1.4344e-23	1.17252e-22	yes	no
CG11453	39.3593	-2.97751	0.422799	4.93186e-14	2.37743e-13	yes	yes
CG11454	262.159	-0.223667	0.149944	0.123802	0.175162	no	no
CG1146	557.086	0.238152	0.140419	0.081296	0.120157	no	no
CG11523	173.503	0.0547667	0.174834	0.743912	0.799602	no	no
CG11529	197.737	3.70898	0.243423	2.8506e-53	6.40306e-52	yes	yes
CG11534	486.083	-0.0306348	0.103972	0.764919	0.817852	no	no
CG11539	81.0269	-0.31291	0.198487	0.0956313	0.139114	no	no
CG11550	29637.4	-1.46513	0.0872384	1.32619e-64	3.89551e-63	yes	no
CG11562	58.2689	-1.30657	0.292533	5.74474e-07	1.66187e-06	yes	no
CG11563	234.743	0.79938	0.145942	1.4476e-08	4.80078e-08	no	no
CG11576	1907.96	-0.953634	0.0849902	6.68971e-30	6.99866e-29	no	no
CG11581	0	0	1.70566	NA	NA	no	no
CG11583	411.308	0.412235	0.121309	0.000518262	0.00108823	no	no
CG11586	170.5	-0.310415	0.168035	0.0545702	0.0833521	no	no
CG11590	268.069	0.522568	0.14466	0.000194344	0.000428969	no	no
CG11596	280.092	0.0054074	0.135554	0.96737	0.980949	no	no
CG11619	4.88702	-5.11354	1.51454	1.6093e-05	4.04671e-05	no	no
CG11629	0	0	1.70566	NA	NA	no	no
CG11634	0	0	1.70566	NA	NA	no	no
CG11635	15.2953	-0.362089	0.429035	0.278845	0.360074	no	no
CG11638	38.604	-2.22431	0.38166	9.9351e-11	3.9025e-10	yes	yes
CG11652	2843.17	1.15315	0.159091	4.50719e-14	2.19049e-13	no	no
CG11655	2276.41	1.03315	0.0970263	2.79422e-27	2.64856e-26	no	no
CG11656	0.363918	-0.120215	1.10229	0.750918	0.805782	no	no
CG11659	0.849718	0	1.11749	1	1	no	no
CG11663	0.261747	0.130477	1.23913	0.72183	NA	no	no
CG11664	0	0	1.70566	NA	NA	no	no
CG11666	0	0	1.70566	NA	NA	no	no
CG11672	0.0716119	-0.0417889	1.21731	0.908135	NA	no	no
CG11674	63.5939	1.07141	1.13331	0.0460205	0.0716023	no	no
CG11679	225.115	-0.98081	0.139469	3.8218e-13	1.73884e-12	no	no
CG11686	199.78	-2.73016	0.214272	6.87684e-39	1.01838e-37	yes	yes
CG11693	1.57917	-1.76766	1.81633	0.0171182	0.0287599	no	no
CG11697	0.242983	-0.0417882	1.21731	0.908136	NA	no	no
CG11699	397.793	-0.512408	0.121469	1.61923e-05	4.06787e-05	no	no
CG11722	242.54	-0.237141	0.161767	0.128422	0.181146	no	no
CG11741	5.0873	-2.26956	1.29571	0.00200292	0.00387116	no	no
CG11753	308.396	-0.675571	0.134099	2.20759e-07	6.6489e-07	no	no
CG11755	55.0147	-1.94073	0.366216	2.6604e-09	9.32621e-09	yes	no
CG11760	55.1497	0.337226	0.235668	0.12174	0.172586	no	no
CG11777	91.9589	-0.992193	0.249255	1.24464e-05	3.15347e-05	no	no
CG11779	774.888	0.807307	0.0992385	1.36782e-16	7.66496e-16	no	no
CG11781	327.462	0.561126	0.151546	0.000126971	0.000285806	no	no
CG11786	4.1405	-1.22111	1.32111	0.0371373	0.0586691	no	no
CG11788	38.6082	-1.3533	0.332424	3.04062e-06	8.19313e-06	no	no
CG11796	2777.57	-2.63864	0.179362	9.73121e-51	2.0977e-49	yes	yes
CG11807	1052.98	-0.595548	0.077149	6.68527e-15	3.39406e-14	no	no
CG11808	93.0708	-0.702242	0.261913	0.00301493	0.00569936	no	no
CG11811	282.206	-0.497957	0.128349	7.03206e-05	0.00016402	no	no
CG11816	0.366053	0.299295	1.32134	0.439711	0.528722	no	no
CG11825	76.2078	2.88378	0.304915	7.67377e-23	6.04182e-22	yes	yes
CG11835	156.91	0.0526054	0.22323	0.800723	0.84759	no	no
CG11839	131.192	-0.08203	0.21454	0.683713	0.752549	no	no
CG11842	346.006	0.455558	0.138055	0.000691935	0.00143147	no	no
CG11857	1217.12	0.543436	0.0969427	1.30426e-08	4.33347e-08	no	no
CG11858	135.074	0.336074	0.199539	0.0747911	0.111127	no	no
CG11865	0	0	1.70566	NA	NA	no	no
CG11885	85.5088	0.632436	0.207765	0.00116484	0.00233143	no	no
CG11889	28.2378	0.170066	0.370413	0.578727	0.661509	no	no
CG11906	242.255	0.0477808	0.133802	0.714396	0.776884	no	no
CG11911	3.02079	0.10366	0.746867	0.784611	0.834401	no	no
CG11912	0.0716119	-0.0417889	1.21731	0.908135	NA	no	no
CG11920	189.118	-0.576503	0.175746	0.000591842	0.00123545	no	no
CG11929	2.43143	0	0.902063	1	1	no	no
CG11964	521.36	-0.398819	0.105068	0.000114988	0.00026081	no	no
CG11966	0.937918	0.229315	1.00914	0.559633	0.643121	no	no
CG11970	981.566	0.505419	0.0908198	1.76396e-08	5.81747e-08	no	no
CG11975	659.992	0.516439	0.0881835	3.12832e-09	1.09093e-08	no	no
CG11977	2.13633	0.2593	0.92506	0.512201	0.599306	no	no
CG11980	511.195	-2.59421	0.136069	8.35855e-83	3.33469e-81	yes	yes
CG11985	223.979	0.380248	0.191276	0.0362282	0.0573175	no	no
CG11999	970.934	0.816004	0.0930428	5.7783e-19	3.69507e-18	no	no
CG12003	0.305862	0	1.21477	1	1	no	no
CG12006	620.901	0.102789	0.0875456	0.235425	0.310454	no	no
CG12007	499.513	-0.824839	0.100702	8.16157e-17	4.64662e-16	no	no
CG12016	592.115	0.579731	0.104037	1.47166e-08	4.87756e-08	no	no
CG12018	115.097	-0.534863	0.205945	0.0057111	0.0103532	no	no
CG12024	297.91	0.378694	0.110054	0.000463298	0.000977423	no	no
CG12025	772.619	0.87387	0.10988	4.90336e-16	2.6721e-15	no	no
CG12027	0.618861	0	1.16327	1	1	no	no
CG12034	403.273	-0.0232134	0.133854	0.858937	0.894231	no	no
CG12035	0.403128	0.256515	1.1485	0.515135	0.601825	no	no
CG12038	61.2651	-0.27641	0.252795	0.231821	0.306534	no	no
CG12050	685.038	0.471358	0.103227	3.51384e-06	9.42076e-06	no	no
CG12056	470.707	-0.197278	0.112628	0.0746535	0.110953	no	no
CG12057	0.946634	-0.415229	1.40331	0.309205	0.392639	no	no
CG12081	347.802	0.420021	0.142408	0.00238927	0.00457652	no	no
CG12090	2079.47	-0.0391298	0.060858	0.518135	0.603212	no	no
CG12091	1095.84	-0.0873167	0.132009	0.498128	0.586821	no	no
CG12096	624.463	-0.573966	0.10135	8.80811e-09	2.98026e-08	no	no
CG12099	4331.11	0.107164	0.0815047	0.184564	0.251127	no	no
CG12104	236.403	-0.065917	0.140101	0.628867	0.704216	no	no
CG12106	107.993	1.15107	0.222783	2.61209e-08	8.44271e-08	no	no
CG12107	466.013	-0.281188	0.153188	0.0578331	0.0878839	no	no
CG12111	6.50916	1.09446	0.789607	0.0213294	0.0352043	no	no
CG12115	1.03191	-0.984664	1.47715	0.0758819	0.112685	no	no
CG12116	504.678	-2.10804	0.248283	4.20716e-19	2.71964e-18	yes	no
CG12118	470.595	0.375321	0.13084	0.00328665	0.00616939	no	no
CG12121	2738.31	0.803254	0.0609829	4.32162e-40	6.58216e-39	no	no
CG12123	107.777	-0.219023	0.18824	0.221593	0.294906	no	no
CG12125	359.095	-0.0305872	0.157947	0.841175	0.879484	no	no
CG12126	0	0	1.70566	NA	NA	no	no
CG12128	432.489	0.980569	0.105139	2.06461e-21	1.50579e-20	no	no
CG12134	152.186	-1.67289	0.172413	1.06129e-23	8.74211e-23	yes	no
CG12147	0.072818	-0.0417889	1.21731	0.908135	NA	no	no
CG12155	416.486	0.225286	0.108428	0.0346918	0.055066	no	no
CG12158	21103.7	-1.39742	0.379156	1.34998e-05	3.40907e-05	yes	no
CG12159	159.878	-0.341793	0.161496	0.028085	0.0452242	no	no
CG12162	815.04	0.391123	0.0942594	2.63731e-05	6.47935e-05	no	no
CG12164	0.936985	-0.582845	1.4118	0.201178	0.271043	no	no
CG12179	110.66	-1.8722	0.246194	7.64767e-16	4.08436e-15	yes	no
CG1218	330.324	0.0489517	0.119044	0.67503	0.744832	no	no
CG12182	189.632	0.797989	0.178513	2.59973e-06	7.04776e-06	no	no
CG12194	230.771	-0.335419	0.14474	0.0169793	0.0285445	no	no
CG12203	1709.95	-0.056507	0.111324	0.605671	0.684405	no	no
CG12207	2558.62	0.641255	0.103198	2.65918e-10	1.01326e-09	no	no
CG12209	1.06906	-0.494733	1.125	0.258968	0.337751	no	no
CG12219	313.891	-0.505867	0.15511	0.000727394	0.00149967	no	no
CG12229	65.067	8.16566	1.06161	1.1058e-16	6.25566e-16	yes	yes
CG12231	0	0	1.70566	NA	NA	no	no
CG12237	742.068	0.924002	0.12051	4.00324e-15	2.0598e-14	no	no
CG12253	154.893	0.36363	0.228058	0.0860971	0.126623	no	no
CG12262	8571.28	0.0087602	0.068041	0.896912	0.925825	no	no
CG12267	268.347	-0.70305	0.16308	7.02774e-06	1.82735e-05	no	no
CG1227	236.13	-5.83686	0.410538	6.04738e-47	1.13436e-45	yes	yes
CG12272	830.563	-0.617275	0.0935554	2.26727e-11	9.22437e-11	no	no
CG12290	1418.98	-2.04858	0.125189	7.98897e-62	2.22443e-60	yes	no
CG12307	0.367491	0.011389	1.20484	0.974977	0.985857	no	no
CG12321	912.783	0.138193	0.0779324	0.0737638	0.109753	no	no
CG12325	375.44	-0.338848	0.123228	0.00496037	0.00905984	no	no
CG1233	1338.09	0.533627	0.0846059	1.82585e-10	7.02735e-10	no	no
CG12333	291.419	-0.536649	0.112918	1.27158e-06	3.55908e-06	no	no
CG12338	219.278	-1.55708	0.16297	5.28022e-23	4.20687e-22	yes	no
CG1234	672.296	-0.286681	0.122914	0.0172033	0.0288938	no	no
CG12341	124.46	0.403922	0.186279	0.0226747	0.037218	no	no
CG12343	315.488	-1.16768	0.143508	4.13208e-17	2.39329e-16	no	no
CG12360	1525.97	0.567561	0.0802333	9.10526e-13	4.04628e-12	no	no
CG12362	0.360472	-0.248556	1.28402	0.51378	0.60089	no	no
CG12374	29.8813	-0.691578	1.21448	0.149759	0.208276	no	no
CG12375	992.379	-0.432164	0.111371	7.78692e-05	0.000179978	no	no
CG12379	87.111	0.461145	0.21845	0.0237389	0.0388218	no	no
CG1239	128.624	-0.118617	0.189638	0.510997	0.598546	no	no
CG12391	600.021	0.0277552	0.105352	0.789102	0.837843	no	no
CG12395	0	0	1.70566	NA	NA	no	no
CG12400	857.329	-0.18805	0.105189	0.069484	0.103876	no	no
CG12404	1002.86	0.613511	0.11405	4.06977e-08	1.2997e-07	no	no
CG12426	0.317576	0.277765	1.30767	0.469484	0.558616	no	no
CG12438	0.237168	-0.0272693	1.21189	0.940022	NA	no	no
CG12439	0	0	1.70566	NA	NA	no	no
CG12446	0.171371	0	1.21477	1	NA	no	no
CG12448	11.1641	-4.98957	1.18722	1.22509e-06	3.43437e-06	yes	yes
CG1246	16.2826	-0.363423	0.402999	0.260234	0.339072	no	no
CG12464	0.0939444	0.130477	1.23913	0.721831	NA	no	no
CG12470	2.65006	-0.803077	1.00419	0.0948358	0.138145	no	no
CG12479	0	0	1.70566	NA	NA	no	no
CG12496	0.14443	-0.115492	1.2298	0.752373	NA	no	no
CG12498	0.345158	-0.107311	1.18935	0.771981	0.823426	no	no
CG12507	59.191	-2.22571	0.368153	2.64417e-11	1.06927e-10	yes	yes
CG12511	0	0	1.70566	NA	NA	no	no
CG12512	1992.16	-0.065482	0.1391	0.62881	0.704216	no	no
CG12516	0	0	1.70566	NA	NA	no	no
CG12517	0.54358	0.320751	1.31973	0.414328	0.50318	no	no
CG12531	76.3717	0.021794	0.235066	0.920301	0.94331	no	no
CG12540	0	0	1.70566	NA	NA	no	no
CG12541	96.0392	1.7798	0.222352	3.66496e-17	2.13662e-16	yes	no
CG12576	1986.07	0.0711318	0.103095	0.483889	0.573585	no	no
CG12589	0	0	1.70566	NA	NA	no	no
CG12590	0.14443	-0.115492	1.2298	0.752373	NA	no	no
CG12608	271.468	-1.86856	0.163412	8.0443e-32	9.07275e-31	yes	no
CG12609	0	0	1.70566	NA	NA	no	no
CG12617	0	0	1.70566	NA	NA	no	no
CG12620	0.0939444	0.130477	1.23913	0.721831	NA	no	no
CG12637	0	0	1.70566	NA	NA	no	no
CG12643	10.3581	-2.22446	0.770486	7.23133e-05	0.000168301	yes	yes
CG12645	7.23859	2.39293	1.61649	0.0036373	0.00677527	no	no
CG1265	189.135	0.221601	0.162075	0.156156	0.216384	no	no
CG12655	456.509	0.0545714	0.187635	0.760169	0.813586	no	no
CG12659	38.1778	1.42164	0.41689	3.67029e-05	8.86241e-05	no	no
CG12661	0	0	1.70566	NA	NA	no	no
CG12674	0	0	1.70566	NA	NA	no	no
CG12679	0.363347	-0.108798	1.21995	0.76669	0.81909	no	no
CG12680	0.202506	0.0435748	1.21754	0.904239	NA	no	no
CG12682	0	0	1.70566	NA	NA	no	no
CG12689	14.6171	-1.67159	0.535635	6.24942e-05	0.000146661	yes	no
CG12698	0.503634	-0.389647	1.27628	0.346581	0.432599	no	no
CG12699	0.436686	0.130478	1.23914	0.721828	0.782421	no	no
CG12702	48.7314	-0.652297	0.363899	0.0315548	0.0504311	no	no
CG12708	2.70661	-1.04364	1.20082	0.0540041	0.0826055	no	no
CG12713	68.4857	0.599879	0.253112	0.00925695	0.0162201	no	no
CG12716	2.3157	-1.55297	1.94991	0.0272089	0.043879	no	no
CG12721	3.11907	-0.346373	0.830087	0.389554	0.477431	no	no
CG12729	0	0	1.70566	NA	NA	no	no
CG1273	446.619	4.91442	0.378199	2.34603e-39	3.51313e-38	yes	yes
CG12730	363.847	-0.696862	0.168709	1.58547e-05	3.99056e-05	no	no
CG12736	452.282	-0.358805	0.1222	0.00270605	0.00514641	no	no
CG12744	16.1659	0.144358	0.376709	0.640883	0.715243	no	no
CG12746	1498.02	0.512219	0.0794669	7.68463e-11	3.02965e-10	no	no
CG12768	44.334	0.661138	0.308435	0.0140983	0.0239725	no	no
CG12773	1220.33	0.414659	0.0830448	4.57736e-07	1.33865e-06	no	no
CG12782	0	0	1.70566	NA	NA	no	no
CG12795	252.621	-0.100923	0.124565	0.407881	0.496252	no	no
CG12796	0.251214	-0.191991	1.25492	0.607295	NA	no	no
CG12811	733.669	1.00249	0.102345	2.06374e-23	1.6691e-22	no	no
CG12818	121.945	0.648619	0.184075	0.000207519	0.00045673	no	no
CG12825	372.445	5.57466	0.203972	2.06089e-165	2.1603e-163	yes	yes
CG12826	140.652	11.0285	1.21874	6.76257e-22	5.10631e-21	yes	yes
CG12828	0	0	1.70566	NA	NA	no	no
CG12831	0.0716119	-0.0417889	1.21731	0.908135	NA	no	no
CG12848	244.782	-1.28486	0.161022	1.07443e-16	6.08467e-16	no	no
CG12849	0.13806	0	1.21477	1	NA	no	no
CG12858	278.072	-0.279192	0.125773	0.0232345	0.0380666	no	no
CG12859	667	0.0540013	0.109036	0.614701	0.692851	no	no
CG12861	0.541334	0.246274	1.27225	0.518813	0.603739	no	no
CG12863	118.852	-0.859828	0.216367	1.93547e-05	4.82434e-05	no	no
CG12866	0.179602	-0.142037	1.23643	0.699815	NA	no	no
CG12869	282.947	1.36858	0.146802	6.7577e-22	5.10631e-21	yes	no
CG12880	5.49638	0.311036	0.660397	0.422362	0.511763	no	no
CG12895	371.698	-2.0311	0.173191	2.13426e-33	2.54681e-32	yes	no
CG12909	93.1612	-1.47053	0.240137	4.45175e-11	1.7787e-10	yes	no
CG1291	1056.96	1.72485	0.0825957	2.74238e-98	1.3328e-96	yes	no
CG12913	34.3019	-0.425863	0.319981	0.124515	0.176099	no	no
CG12914	0	0	1.70566	NA	NA	no	no
CG12920	0	0	1.70566	NA	NA	no	no
CG12926	352.976	0.369273	0.175559	0.0279662	0.0450867	no	no
CG12929	93.0517	-0.832026	0.276088	0.000749046	0.00154193	no	no
CG12935	117.175	-0.904149	0.201706	1.77085e-06	4.88239e-06	no	no
CG12948	204.325	-0.9583	0.154882	1.2421e-10	4.83634e-10	no	no
CG12963	1.51383	0.235629	0.861242	0.547131	0.630516	no	no
CG12975	102.174	0.0434812	0.1858	0.806155	0.851783	no	no
CG12984	0.269297	-0.0415533	1.21157	0.908851	NA	no	no
CG12985	8.79376	-1.53594	0.705097	0.00144267	0.00284805	yes	no
CG12986	1.17567	0.385236	1.10009	0.356238	0.442792	no	no
CG12995	0.072818	-0.0417889	1.21731	0.908135	NA	no	no
CG13000	0	0	1.70566	NA	NA	no	no
CG13004	66.5017	0.84935	0.284328	0.000775445	0.00159382	no	no
CG13005	80.2244	-1.00071	0.245226	7.91537e-06	2.04324e-05	no	no
CG13010	1.29092	0.214683	0.812344	0.580085	0.662494	no	no
CG13012	143.196	2.51195	0.232783	6.32844e-29	6.4688e-28	yes	yes
CG13014	221.452	0.309672	0.145401	0.0282231	0.0454187	no	no
CG13016	214.84	-0.126942	0.150673	0.384722	0.472267	no	no
CG13018	53.8911	-0.592523	0.270306	0.0148288	0.0251267	no	no
CG13024	560.469	0.728399	0.115066	1.01126e-10	3.96348e-10	no	no
CG13026	1.61177	0.568699	0.909349	0.193463	0.261771	no	no
CG13028	0.685865	-0.0510683	0.976462	0.892716	0.92275	no	no
CG13029	4.63796	0.638581	0.952036	0.157021	0.217244	no	no
CG13033	0	0	1.70566	NA	NA	no	no
CG13041	0.294566	0.267055	1.30124	0.484961	0.574474	no	no
CG13045	0	0	1.70566	NA	NA	no	no
CG13046	2.12914	0	0.933152	1	1	no	no
CG13054	0.506976	0	1.19993	1	1	no	no
CG13055	4.38536	1.20181	1.30929	0.0386442	0.0609236	no	no
CG13063	0	0	1.70566	NA	NA	no	no
CG13064	0	0	1.70566	NA	NA	no	no
CG13069	0.072818	-0.0417889	1.21731	0.908135	NA	no	no
CG1307	545.34	0.821632	0.0988671	3.0317e-17	1.77131e-16	no	no
CG13071	0	0	1.70566	NA	NA	no	no
CG13081	0.187889	0.199454	1.26716	0.59303	NA	no	no
CG13082	8.10893	0.390098	0.536488	0.292591	0.375917	no	no
CG13083	6.41305	-0.438427	1.26566	0.303449	0.387261	no	no
CG13088	80.4997	-0.801351	0.2234	0.000108171	0.000246286	no	no
CG1309	2818.92	0.360422	0.0775723	2.78194e-06	7.52265e-06	no	no
CG13090	881.76	2.59367	0.0953942	1.49229e-164	1.50524e-162	yes	yes
CG13097	237.494	-1.1846	0.163749	4.54847e-14	2.20654e-13	no	no
CG13101	1509.32	1.49748	0.206835	2.07906e-14	1.02534e-13	yes	no
CG13108	13.2155	2.54479	0.730116	7.81786e-06	2.02198e-05	yes	yes
CG1311	2270.69	0.65922	0.0672897	5.79902e-23	4.59282e-22	no	no
CG13110	0	0	1.70566	NA	NA	no	no
CG13116	365.804	0.0114972	0.136174	0.93099	0.95073	no	no
CG13117	111.517	0.077198	0.206001	0.691142	0.757762	no	no
CG13126	86.2957	-1.83343	0.229681	4.07265e-17	2.36399e-16	yes	no
CG13127	0.450273	-0.360485	1.26149	0.37713	0.464655	no	no
CG13133	23.4245	-0.912178	0.380189	0.00366696	0.00682576	no	no
CG13148	3.18874	-0.408233	0.789556	0.316015	0.399484	no	no
CG13151	179.374	0.0740636	0.19156	0.684262	0.752998	no	no
CG13154	0.348938	-0.0417877	1.21731	0.908137	0.933967	no	no
CG13157	0	0	1.70566	NA	NA	no	no
CG13168	0.399787	-0.176566	1.10322	0.646192	0.719397	no	no
CG13170	0.072818	-0.0417889	1.21731	0.908135	NA	no	no
CG13171	0	0	1.70566	NA	NA	no	no
CG13177	4.11837	1.3923	0.999834	0.0119424	0.0206081	no	no
CG13183	8.31025	0.0262106	0.525674	0.942063	0.960204	no	no
CG13185	1199.24	-0.453488	0.111971	3.71003e-05	8.95029e-05	no	no
CG13186	0.200622	0.20741	1.27058	0.57938	NA	no	no
CG1319	424.921	0.303543	0.10952	0.00482127	0.0088401	no	no
CG13192	148.15	-1.36729	0.169303	4.01312e-17	2.33197e-16	yes	no
CG13193	0.214836	-0.171326	1.24638	0.644493	NA	no	no
CG13204	130.665	-0.703873	0.183455	5.32877e-05	0.000126331	no	no
CG13215	44.0604	5.69208	0.737577	1.04551e-15	5.54493e-15	yes	yes
CG13216	0	0	1.70566	NA	NA	no	no
CG13220	632.852	-0.0774406	0.10852	0.468329	0.557614	no	no
CG13228	0	0	1.70566	NA	NA	no	no
CG13229	71.9777	0.88313	0.232266	3.64345e-05	8.80157e-05	no	no
CG13230	0	0	1.70566	NA	NA	no	no
CG13231	0.26809	-0.0406708	1.21157	0.91077	NA	no	no
CG13239	0.737864	-0.606317	1.35653	0.191395	0.259234	no	no
CG1324	0.375777	0.307267	1.32663	0.429138	0.518243	no	no
CG13244	0.242983	-0.0417882	1.21731	0.908136	NA	no	no
CG13247	5.43885	-3.36599	1.49888	0.000382426	0.000813873	no	no
CG13248	112.907	-1.56766	0.187158	2.2679e-18	1.40326e-17	yes	no
CG13255	117.094	1.37275	0.207568	2.24057e-12	9.69101e-12	yes	no
CG13258	2.79284	0.290894	0.677797	0.453236	0.54303	no	no
CG13272	0.790232	0	1.12621	1	1	no	no
CG13282	6.2	0.512847	0.539265	0.17209	0.235775	no	no
CG13285	228.714	2.55979	0.181784	8.31147e-47	1.54282e-45	yes	yes
CG13293	49.1257	0.0869598	0.256469	0.710374	0.774058	no	no
CG13295	613.754	0.134544	0.0922487	0.140044	0.195681	no	no
CG13296	12.401	0.335997	0.89866	0.406096	0.494306	no	no
CG13297	5.98818	1.15136	0.923369	0.02424	0.0395806	no	no
CG13298	485.324	-0.118528	0.107291	0.261725	0.3406	no	no
CG13305	0	0	1.70566	NA	NA	no	no
CG13306	6.58501	-0.0459648	0.504648	0.897299	0.925825	no	no
CG13309	0.0939444	0.130477	1.23913	0.721831	NA	no	no
CG13310	16.4542	1.14449	0.632604	0.00818924	0.0144822	no	no
CG13311	0.0939444	0.130477	1.23913	0.721831	NA	no	no
CG13312	0.072818	-0.0417889	1.21731	0.908135	NA	no	no
CG13313	1.57217	-1.087	1.3545	0.054867	0.0837576	no	no
CG13314	1.10002	-0.166543	0.845639	0.665092	0.736298	no	no
CG13315	97.1349	-1.08191	0.385083	0.000686808	0.00142284	no	no
CG13318	566.449	2.77839	0.121361	1.15856e-117	7.94056e-116	yes	yes
CG13321	2.36221	0.0191504	0.781733	0.959533	0.975222	no	no
CG13323	1.00895	-0.398233	1.02279	0.340925	0.426735	no	no
CG13326	0.179602	-0.142037	1.23643	0.699815	NA	no	no
CG13330	0.274118	-0.0282123	1.21184	0.937958	NA	no	no
CG13332	115.839	-4.77972	0.352895	1.64028e-42	2.70647e-41	yes	yes
CG13334	0.520207	0.158519	1.14463	0.676577	0.74623	no	no
CG13339	310.143	-0.337986	0.144951	0.016298	0.0274508	no	no
CG13344	150.852	0.679153	0.159879	9.91368e-06	2.53097e-05	no	no
CG13358	2.50804	0.793867	0.982184	0.0959071	0.139477	no	no
CG13360	127.422	-0.905619	0.217685	7.57105e-06	1.96194e-05	no	no
CG13361	0.594535	-0.259139	1.16288	0.510544	0.598152	no	no
CG13362	2.82938	-0.290051	0.907514	0.467149	0.556333	no	no
CG13365	152.995	-0.418678	0.161441	0.00708985	0.0126764	no	no
CG13367	197.683	-1.46432	0.158059	9.67986e-22	7.20732e-21	yes	no
CG13369	555.184	-0.50849	0.113388	4.85737e-06	1.28171e-05	no	no
CG13373	69.2477	-0.669208	0.224796	0.00132319	0.00262867	no	no
CG13375	16.2796	-0.434885	0.431219	0.195489	0.264377	no	no
CG13377	1348.9	-0.466486	0.146838	0.00104379	0.00210888	no	no
CG1339	8.81237	-0.474362	0.647239	0.232471	0.307241	no	no
CG13390	117.316	-1.74248	0.216445	2.65218e-17	1.55296e-16	yes	no
CG13392	123.871	-0.128863	0.198196	0.492456	0.581805	no	no
CG13397	260.297	-5.51997	0.257277	4.7697e-103	2.60192e-101	yes	yes
CG13398	182.749	0.163634	0.15634	0.278994	0.360179	no	no
CG13403	0.791349	-0.487998	1.36725	0.25952	0.338324	no	no
CG13405	5.1066	0.834807	1.12324	0.0942317	0.137377	no	no
CG13408	6.06535	-0.945744	0.73301	0.0354708	0.056169	no	no
CG13409	113.562	0.140648	0.168135	0.384425	0.472038	no	no
CG13426	2.77428	-2.27169	1.82055	0.00657066	0.0118033	no	no
CG13436	24.9745	-0.272757	0.455107	0.427338	0.516983	no	no
CG13437	61.8678	-0.740312	0.266133	0.0020161	0.00389241	no	no
CG13443	0	0	1.70566	NA	NA	no	no
CG13445	0.106678	0.130477	1.23913	0.721831	NA	no	no
CG13454	1.5894	0.973548	1.36166	0.0741847	0.110348	no	no
CG13458	19.219	-3.96123	0.669338	2.71408e-10	1.03197e-09	yes	yes
CG13465	0.171371	0	1.21477	1	NA	no	no
CG13473	1.69111	0.404897	0.891189	0.327204	0.411972	no	no
CG13477	0.143224	-0.114495	1.2296	0.754388	NA	no	no
CG13484	71.2875	-0.517189	0.225737	0.0136112	0.0232255	no	no
CG13488	1.94298	-2.12515	1.99167	0.010286	0.0179292	no	no
CG13500	0.330422	-0.138498	1.20849	0.709309	0.773397	no	no
CG13501	0	0	1.70566	NA	NA	no	no
CG13506	1065.74	0.613085	0.101858	9.60314e-10	3.49717e-09	no	no
CG13510	434.678	-0.45457	0.195345	0.0139323	0.0237054	no	no
CG13516	321.854	0.50874	0.114735	6.1405e-06	1.60367e-05	no	no
CG13526	0.0939444	0.130477	1.23913	0.721831	NA	no	no
CG13531	2338.2	0.789629	0.0817139	1.51688e-22	1.17017e-21	no	no
CG13532	61.182	0.8151	0.226998	0.000102423	0.000233698	no	no
CG13538	0.559469	-0.448712	1.28886	0.293833	0.377151	no	no
CG13539	0	0	1.70566	NA	NA	no	no
CG13541	0	0	1.70566	NA	NA	no	no
CG13544	0.453148	-0.149426	1.23213	0.686301	0.754518	no	no
CG13557	0	0	1.70566	NA	NA	no	no
CG13558	0	0	1.70566	NA	NA	no	no
CG13559	1.53171	-0.073656	0.785623	0.845762	0.883958	no	no
CG13563	9.14887	-0.267778	0.444277	0.43039	0.519383	no	no
CG13564	0	0	1.70566	NA	NA	no	no
CG13565	0.932836	-0.52625	1.12425	0.236105	0.311121	no	no
CG13566	2.31705	0.336833	0.710172	0.392659	0.48057	no	no
CG13575	38.8342	-1.32755	0.350326	1.05331e-05	2.67886e-05	no	no
CG13578	468.234	-1.23639	0.138062	2.80381e-20	1.94412e-19	no	no
CG1358	132.333	2.57617	0.230442	8.81113e-31	9.47772e-30	yes	yes
CG13581	0	0	1.70566	NA	NA	no	no
CG13585	1340.87	-0.239364	0.097999	0.0133101	0.0227625	no	no
CG13599	26.136	-1.35973	0.509089	0.000511609	0.0010751	no	no
CG1360	50.1124	0.125709	0.245906	0.578324	0.661189	no	no
CG13601	255.108	-0.547218	0.130363	1.66336e-05	4.17479e-05	no	no
CG13605	896.998	0.311045	0.100472	0.00168835	0.00330136	no	no
CG13607	131.508	-2.99116	0.253922	1.53457e-33	1.85606e-32	yes	yes
CG13613	0	0	1.70566	NA	NA	no	no
CG13622	15.3608	0.99392	0.462893	0.00555207	0.0100786	no	no
CG13623	213.478	1.09618	0.176688	7.09002e-11	2.80142e-10	no	no
CG13630	509.289	-0.520269	0.0950918	2.93031e-08	9.437e-08	no	no
CG13634	1.17233	-1.15056	1.51208	0.0519351	0.0798749	no	no
CG13639	23.6469	-4.86994	0.720462	1.83694e-12	8.0231e-12	yes	yes
CG13640	4.38585	-2.83404	1.64069	0.00160899	0.00315542	no	no
CG13653	0	0	1.70566	NA	NA	no	no
CG13663	443.203	0.435427	0.131523	0.000686936	0.00142284	no	no
CG13667	234.954	-0.579137	0.143661	3.19996e-05	7.80073e-05	no	no
CG13671	519.77	0.136693	0.117303	0.235015	0.310143	no	no
CG13676	19.4525	1.18735	0.463617	0.00108609	0.00218772	no	no
CG13685	47.2803	-1.06965	0.320657	0.000121732	0.000275287	no	no
CG13689	95.0636	0.223494	0.210494	0.258765	0.337569	no	no
CG13690	39.3968	1.43027	0.69843	0.00247899	0.00473479	no	no
CG13692	4.65159	-1.93606	1.39236	0.00627588	0.0113042	no	no
CG13704	11.8998	-2.41374	0.751888	2.18177e-05	5.4099e-05	yes	yes
CG1371	1958.08	-0.658916	0.102386	6.07328e-11	2.41217e-10	no	no
CG13712	0.106678	0.130477	1.23913	0.721831	NA	no	no
CG13713	1.29277	0.0249091	0.85573	0.947469	0.964794	no	no
CG13723	0	0	1.70566	NA	NA	no	no
CG13724	0	0	1.70566	NA	NA	no	no
CG13725	0	0	1.70566	NA	NA	no	no
CG13728	0.072818	-0.0417889	1.21731	0.908135	NA	no	no
CG13737	21.5499	2.71244	0.451415	3.43756e-11	1.38071e-10	yes	yes
CG13742	71.9811	-4.1786	0.920094	2.98104e-07	8.8815e-07	yes	yes
CG13747	0.0939444	0.130477	1.23913	0.721831	NA	no	no
CG13748	4.77715	0.686315	0.733337	0.10929	0.156178	no	no
CG13751	261.105	-0.0535675	0.170816	0.744111	0.799602	no	no
CG13759	0.565853	-0.082605	1.0336	0.82742	0.867671	no	no
CG13766	96.0601	-0.594979	0.214068	0.00293186	0.00554821	no	no
CG13771	26.5276	0.109469	0.81207	0.77357	0.824956	no	no
CG13773	169.476	0.510425	0.157869	0.000795748	0.00163179	no	no
CG13786	0.171371	0	1.21477	1	NA	no	no
CG13801	0.0939444	0.130477	1.23913	0.721831	NA	no	no
CG13806	0.0939444	0.130477	1.23913	0.721831	NA	no	no
CG13807	169.728	-1.36387	0.208993	4.1193e-12	1.75193e-11	no	no
CG13810	0.666252	-0.526938	1.32583	0.236522	0.311516	no	no
CG13829	1.96423	-1.43215	1.60706	0.0290227	0.0466212	no	no
CG13837	0	0	1.70566	NA	NA	no	no
CG13838	0	0	1.70566	NA	NA	no	no
CG13841	1116	-2.05476	0.117287	2.35216e-70	7.81034e-69	yes	no
CG13843	4.28373	1.66358	1.26745	0.00982985	0.0171789	no	no
CG13856	212.671	-2.37714	0.206057	1.44751e-32	1.68592e-31	yes	yes
CG13857	0	0	1.70566	NA	NA	no	no
CG13862	0.958035	0	1.01976	1	1	no	no
CG13865	553.589	-0.480891	0.0999496	1.04668e-06	2.95593e-06	no	no
CG13870	1.72889	-0.793496	1.19352	0.111113	0.158656	no	no
CG13872	0.0716119	-0.0417889	1.21731	0.908135	NA	no	no
CG13875	192.058	1.73204	0.166452	7.89281e-27	7.35104e-26	yes	no
CG13887	4265.53	1.19525	0.0577206	2.71331e-96	1.29512e-94	no	no
CG13891	0.513127	-0.0847751	1.11436	0.821248	0.863401	no	no
CG13893	1526.26	2.09928	0.105564	1.15843e-89	5.16079e-88	yes	no
CG13895	251.299	-0.148648	0.135519	0.260601	0.339385	no	no
CG13898	0.244189	-0.0417882	1.21731	0.908136	NA	no	no
CG13900	2400.47	0.0511735	0.0628006	0.412643	0.501361	no	no
CG13901	163.855	0.873621	0.192481	1.49645e-06	4.15369e-06	no	no
CG13902	168.731	-0.608057	0.148231	2.22154e-05	5.49831e-05	no	no
CG13905	0.0716119	-0.0417889	1.21731	0.908135	NA	no	no
CG13907	2251.47	1.35435	0.118761	2.44289e-31	2.70386e-30	yes	no
CG13912	27.2573	-0.619009	0.379266	0.0471353	0.0731877	no	no
CG13917	3823.01	-0.388548	0.103484	0.00013741	0.000307877	no	no
CG13919	152.173	0.223923	0.178883	0.190613	0.258372	no	no
CG13920	75.5559	-0.314508	0.293371	0.226575	0.30034	no	no
CG13924	12.0348	-0.00222796	0.428061	0.994648	1	no	no
CG13926	184.307	0.489317	0.147706	0.000624713	0.00130203	no	no
CG13931	0.162619	-0.129621	1.23304	0.724128	NA	no	no
CG1394	0.425057	0.0903803	1.21354	0.80485	0.851014	no	no
CG13949	9.47262	-0.545325	0.554406	0.152347	0.211434	no	no
CG13955	37.737	-8.52109	1.2449	4.72991e-14	2.29041e-13	yes	yes
CG13957	654.339	0.924584	0.0855471	7.21431e-28	7.05077e-27	no	no
CG13970	0.233025	-0.181904	1.2506	0.625256	NA	no	no
CG13983	2.134	3.17499	2.15795	0.00232099	0.00445051	no	no
CG13992	10.169	0.0555925	0.603951	0.881195	0.914022	no	no
CG13993	1098.06	3.55116	0.175575	6.80408e-92	3.05669e-90	yes	yes
CG13994	622.17	0.961869	0.149133	2.24725e-11	9.15687e-11	no	no
CG13998	0.072818	-0.0417889	1.21731	0.908135	NA	no	no
CG14000	0	0	1.70566	NA	NA	no	no
CG14005	192.07	0.483158	0.157629	0.00147927	0.00291492	no	no
CG14010	178.469	-0.428272	0.16739	0.00771992	0.0137112	no	no
CG14013	0.403375	0.151043	1.18559	0.687574	0.755244	no	no
CG14014	0.171371	0	1.21477	1	NA	no	no
CG1402	2.14236	0.037559	0.699322	0.920548	0.94331	no	no
CG14020	37.3305	-0.893545	0.306902	0.000866609	0.00176626	no	no
CG14022	26.6771	-1.87238	0.44724	6.93479e-07	1.99319e-06	yes	no
CG14024	15.0158	0.0423614	0.394775	0.894046	0.923767	no	no
CG14034	7.76673	-1.80474	0.932272	0.00183809	0.00357194	yes	no
CG14036	1.39551	-0.130167	1.0238	0.733596	0.791657	no	no
CG14040	454.3	0.389267	0.124706	0.00141354	0.00279467	no	no
CG14044	106.681	-1.36735	0.198142	3.1169e-13	1.4254e-12	yes	no
CG14050	12.8195	-2.96494	0.693099	3.682e-07	1.08511e-06	yes	yes
CG14062	0	0	1.70566	NA	NA	no	no
CG14069	74.7979	9.82279	1.46019	6.80868e-14	3.23548e-13	yes	yes
CG14070	1.87518	2.66433	2.14339	0.00490418	0.0089756	no	no
CG14071	0.555379	0.105491	1.20453	0.774578	0.825867	no	no
CG14072	0.161413	-0.128685	1.2328	0.725981	NA	no	no
CG14077	0.823041	0.601197	1.45906	0.18958	0.257298	no	no
CG14089	0.179496	0.0435748	1.21754	0.904239	NA	no	no
CG1409	0	0	1.70566	NA	NA	no	no
CG14102	107.659	-0.644141	0.18337	0.000218486	0.000478698	no	no
CG14106	2.12155	0.259383	0.747991	0.505665	0.593216	no	no
CG14107	0.106678	0.130477	1.23913	0.721831	NA	no	no
CG14110	0.167803	0	1.21477	1	NA	no	no
CG14131	65.9339	-0.825472	0.228679	9.23804e-05	0.000211778	no	no
CG14132	55.5829	1.20826	0.371352	0.000110233	0.000250661	yes	no
CG14135	128.768	-0.570038	0.175967	0.00069217	0.00143147	no	no
CG14137	0.223632	0.22136	1.27691	0.556052	NA	no	no
CG14147	0.459997	0.433132	1.32475	0.303973	0.387653	no	no
CG1416	1144.02	-0.621526	0.133594	1.74176e-06	4.80466e-06	no	no
CG14174	68.4204	-3.4674	0.342251	3.1513e-25	2.72603e-24	yes	yes
CG1418	539.251	0.884782	0.120974	6.73747e-14	3.20449e-13	no	no
CG14183	184.625	-0.496075	0.312456	0.0684821	0.102637	no	no
CG14184	674.469	0.121258	0.13354	0.352086	0.438447	no	no
CG14185	7.89206	0.506209	0.557622	0.183189	0.249447	no	no
CG14187	2.14124	-0.291091	0.882271	0.464769	0.554115	no	no
CG14194	455.06	-0.127704	0.166033	0.42434	0.513705	no	no
CG14195	0	0	1.70566	NA	NA	no	no
CG14196	146.184	-0.906736	0.162927	6.27814e-09	2.14872e-08	no	no
CG14212	2.18568	-2.24542	1.77708	0.00649478	0.0116827	no	no
CG14229	78.8757	-1.55247	0.265388	2.05309e-10	7.87926e-10	yes	no
CG14231	93.3823	-0.575978	0.238422	0.00865522	0.0152357	no	no
CG14232	389.03	0.657311	0.110372	1.28235e-09	4.62581e-09	no	no
CG14244	0	0	1.70566	NA	NA	no	no
CG14247	0	0	1.70566	NA	NA	no	no
CG14258	21.6865	-0.156508	0.400509	0.625707	0.701706	no	no
CG14259	14658.2	-1.11707	0.0837744	1.72509e-41	2.76947e-40	no	no
CG14260	0.684441	-0.414486	1.34048	0.318085	0.401625	no	no
CG14269	0.798812	0.460386	1.18388	0.287025	0.369476	no	no
CG1427	635.795	-0.930196	0.111486	1.61145e-17	9.59332e-17	no	no
CG14270	140.307	-0.454992	0.17843	0.00757539	0.0134802	no	no
CG14273	0.294566	0.267055	1.30124	0.484961	0.574474	no	no
CG14274	12.0714	3.52288	0.87902	1.67907e-06	4.63892e-06	yes	yes
CG14275	486.392	-1.97186	0.12809	4.57292e-55	1.07695e-53	yes	no
CG14282	8.20855	-3.82232	1.55383	0.000208203	0.000457671	no	no
CG14291	814.995	0.757468	0.113277	8.71258e-12	3.63319e-11	no	no
CG14292	0.745899	0.206508	1.01438	0.596735	0.676803	no	no
CG14298	58.6054	-0.00890294	0.285583	0.97216	0.984312	no	no
CG14300	0	0	1.70566	NA	NA	no	no
CG14305	0.555215	-0.259644	1.11399	0.511991	0.59919	no	no
CG14309	23.586	-0.546182	1.35551	0.223706	0.297422	no	no
CG14312	3.63278	0.178092	0.652233	0.638625	0.71393	no	no
CG14317	0.14443	-0.115492	1.2298	0.752373	NA	no	no
CG14321	26.1807	-0.88737	0.569581	0.0262037	0.0424758	no	no
CG14323	0	0	1.70566	NA	NA	no	no
CG14326	0.106678	0.130477	1.23913	0.721831	NA	no	no
CG14327	0	0	1.70566	NA	NA	no	no
CG14329	2.12187	-0.988187	1.25324	0.0663749	0.0997302	no	no
CG14330	0	0	1.70566	NA	NA	no	no
CG14331	11.8979	-5.83521	1.30212	2.9821e-07	8.8815e-07	yes	yes
CG14342	1.41928	-0.0776014	0.90281	0.838114	0.877336	no	no
CG14346	0	0	1.70566	NA	NA	no	no
CG14352	74.8745	0.552123	0.259605	0.019052	0.0317691	no	no
CG14353	112.055	-0.744043	0.192601	4.29502e-05	0.000103057	no	no
CG14362	0.0716119	-0.0417889	1.21731	0.908135	NA	no	no
CG14367	260.937	-1.02357	0.142855	1.26725e-13	5.94276e-13	no	no
CG14369	0	0	1.70566	NA	NA	no	no
CG14380	0.072818	-0.0417889	1.21731	0.908135	NA	no	no
CG14383	0	0	1.70566	NA	NA	no	no
CG14391	0.354102	-0.189719	1.21495	0.615795	0.693674	no	no
CG14397	0.0898009	-0.0417889	1.21731	0.908135	NA	no	no
CG1440	3073.6	0.429283	0.0613767	2.02681e-12	8.81638e-12	no	no
CG14400	21.971	-0.930788	0.406774	0.00465322	0.00856321	no	no
CG14402	0.660979	0.0727822	0.989339	0.847847	0.885208	no	no
CG14407	420.347	-0.26394	0.131354	0.0395505	0.062224	no	no
CG1441	2490.56	-1.90329	0.0851727	3.77289e-112	2.34534e-110	yes	no
CG14417	4.35811	-4.91315	1.66141	4.94039e-05	0.000117698	no	no
CG14427	0	0	1.70566	NA	NA	no	no
CG1444	6775.44	-0.290239	0.0921513	0.00143583	0.0028356	no	no
CG14441	1327.77	0.142953	0.119872	0.22385	0.297539	no	no
CG14448	0.618241	-0.339545	1.11641	0.406914	0.495188	no	no
CG14450	387.336	0.72638	0.136301	4.06531e-08	1.29905e-07	no	no
CG14455	0	0	1.70566	NA	NA	no	no
CG14464	618.82	2.84869	0.186359	2.27986e-54	5.27625e-53	yes	yes
CG14476	15183.7	0.240377	0.0766406	0.00156616	0.00307819	no	no
CG14478	892.637	0.215816	0.0923079	0.0179928	0.0301345	no	no
CG14480	469.175	-0.25507	0.134841	0.0523502	0.0803745	no	no
CG14482	633.699	0.0189282	0.218359	0.926248	0.947643	no	no
CG14483	293.488	0.677195	0.173203	4.2361e-05	0.000101689	no	no
CG14490	3.35864	-0.120447	0.627321	0.748228	0.803541	no	no
CG14491	0.447264	0.334478	1.34561	0.39484	0.481921	no	no
CG14492	0	0	1.70566	NA	NA	no	no
CG14500	1.87451	-0.306878	0.883615	0.443151	0.532618	no	no
CG14502	2.41129	-0.199216	0.796728	0.606058	0.684608	no	no
CG14505	5.62094	0.242996	0.581854	0.516419	0.602132	no	no
CG14507	2.92829	-0.523687	0.713947	0.202662	0.272699	no	no
CG14508	28.5289	-2.25861	0.414008	8.41931e-10	3.08496e-09	yes	yes
CG14512	161.212	0.43721	0.180546	0.0111405	0.0193242	no	no
CG14515	174.348	-8.36371	0.7563	1.23901e-30	1.3221e-29	yes	yes
CG14523	101.422	0.256081	0.179767	0.136146	0.190682	no	no
CG14535	46.5721	0.415125	0.258446	0.0773861	0.114791	no	no
CG14537	0.273546	-0.0532403	1.21189	0.883537	NA	no	no
CG14543	119.996	-1.22614	0.245558	5.25299e-08	1.66662e-07	no	no
CG14544	32.8387	-0.0596964	0.308862	0.825404	0.866237	no	no
CG14551	0.165556	0.0435748	1.21754	0.904239	NA	no	no
CG14561	18.6093	0.384782	0.439685	0.256318	0.334622	no	no
CG14564	0	0	1.70566	NA	NA	no	no
CG14565	0.273546	-0.0532403	1.21189	0.883537	NA	no	no
CG14566	1.22668	0.29692	1.02174	0.460569	0.550089	no	no
CG14567	1298.36	0.0898567	0.155022	0.549115	0.632394	no	no
CG14568	1.54136	0.172221	0.839129	0.654679	0.727331	no	no
CG14569	0	0	1.70566	NA	NA	no	no
CG14570	0.0716119	-0.0417889	1.21731	0.908135	NA	no	no
CG14572	4.73075	-0.630833	0.726314	0.13539	0.189809	no	no
CG14573	0.072818	-0.0417889	1.21731	0.908135	NA	no	no
CG14579	0	0	1.70566	NA	NA	no	no
CG14589	7.22247	-0.51066	0.646087	0.201236	0.271053	no	no
CG14590	121.947	1.7149	0.209093	7.94082e-18	4.79679e-17	yes	no
CG14598	2.53537	-0.265394	0.928849	0.503229	0.591396	no	no
CG14607	0.977688	0.0193464	0.870577	0.959192	0.97506	no	no
CG1461	1380.23	-3.34132	0.319141	7.43225e-27	6.93417e-26	yes	yes
CG14613	270.928	1.76024	0.12956	1.61714e-43	2.78878e-42	yes	no
CG14618	315.529	1.05037	0.120072	3.22967e-19	2.10047e-18	no	no
CG14624	0	0	1.70566	NA	NA	no	no
CG14626	93.7147	-4.69358	0.534012	2.58015e-19	1.69038e-18	yes	yes
CG14627	2.42022	-2.58694	2.07063	0.00515089	0.00938857	no	no
CG14629	451.88	-0.926285	0.383457	0.00336961	0.00631829	no	no
CG1463	64.7225	-1.42741	0.283253	2.50662e-08	8.11652e-08	no	no
CG14636	539.229	3.0683	0.130065	1.9457e-124	1.3869e-122	yes	yes
CG14644	0.553942	0.533676	1.3638	0.230685	0.305183	no	no
CG14645	0.955144	-0.645595	1.32745	0.172936	0.236873	no	no
CG14646	817.253	0.686676	0.0836552	1.04152e-16	5.90455e-16	no	no
CG14650	1322.86	0.75044	0.0761957	2.72976e-23	2.19448e-22	no	no
CG14651	0.630221	-0.228318	1.15466	0.557437	0.640873	no	no
CG14657	523.278	-0.165364	0.0985865	0.0891402	0.130667	no	no
CG14659	0	0	1.70566	NA	NA	no	no
CG14664	0.411992	-0.0482131	1.15732	0.896225	0.925759	no	no
CG14667	254.522	0.228963	0.134119	0.0800512	0.118481	no	no
CG14671	347.636	0.33159	0.132097	0.0100836	0.0176052	no	no
CG14676	11.7634	-4.52149	1.42869	3.22397e-05	7.85567e-05	yes	yes
CG14684	0	0	1.70566	NA	NA	no	no
CG14687	878.075	0.618149	0.154947	3.50631e-05	8.50102e-05	no	no
CG14695	105.366	1.15349	0.198727	6.98092e-10	2.57913e-09	no	no
CG14701	67.0316	-0.122623	0.282667	0.627949	0.703777	no	no
CG14708	0	0	1.70566	NA	NA	no	no
CG14710	174.841	-0.388415	0.175158	0.0205084	0.0339646	no	no
CG14715	156.194	-2.24574	0.180863	3.84742e-37	5.38437e-36	yes	yes
CG14720	0.324032	-0.248774	1.25421	0.517514	0.602883	no	no
CG14722	433.768	-0.45507	0.134606	0.000518127	0.00108823	no	no
CG14731	0	0	1.70566	NA	NA	no	no
CG14749	337.915	-0.582791	0.13047	4.57249e-06	1.21433e-05	no	no
CG14752	0.904058	-0.427797	1.21009	0.314542	0.397903	no	no
CG14757	382.883	0.767613	0.111087	1.80067e-12	7.87757e-12	no	no
CG14759	0	0	1.70566	NA	NA	no	no
CG14760	0.171371	0	1.21477	1	NA	no	no
CG14767	4311.07	0.574957	0.0687643	3.70776e-17	2.15923e-16	no	no
CG14770	8.4483	-6.20908	1.33721	1.16616e-07	3.612e-07	yes	yes
CG14780	0.792493	-0.678783	1.38604	0.158735	0.219159	no	no
CG14795	13.7403	-3.12503	0.786997	1.47482e-06	4.10218e-06	yes	yes
CG14803	270.718	-0.398559	0.126183	0.00123065	0.00245487	no	no
CG14805	595.964	-1.43408	0.125024	9.68751e-32	1.08573e-30	yes	no
CG14806	408.764	-0.403595	0.159849	0.0088139	0.0154946	no	no
CG14812	202.774	1.10988	0.162265	9.73141e-13	4.3102e-12	no	no
CG14814	107.68	-0.809439	0.420189	0.015523	0.026195	no	no
CG14817	171.365	-1.08934	0.161145	1.8115e-12	7.91846e-12	no	no
CG14818	775.6	-0.130979	0.13036	0.303715	0.387416	no	no
CG14820	0.936516	0.671214	1.31752	0.161544	0.22241	no	no
CG14823	29.7979	-1.66174	0.457817	9.76372e-06	2.49606e-05	no	no
CG14826	0.200622	0.20741	1.27058	0.57938	NA	no	no
CG14829	0.480802	0	1.20732	1	1	no	no
CG14830	3241.14	-1.32141	0.111798	2.03483e-33	2.43906e-32	yes	no
CG14837	165.226	-0.351593	0.174228	0.0351324	0.0556663	no	no
CG14839	0	0	1.70566	NA	NA	no	no
CG14851	0.252314	-0.0291512	1.2118	0.935903	NA	no	no
CG14853	53.3336	-0.988023	0.289288	0.000116536	0.000263984	no	no
CG14854	498.756	0.48239	0.114652	1.78971e-05	4.48351e-05	no	no
CG14855	18.2176	-1.54921	0.547055	0.000205861	0.000453454	yes	no
CG14857	11.0853	0.398065	0.527741	0.280206	0.36157	no	no
CG1486	2453.02	0.409057	0.0771132	8.77742e-08	2.7457e-07	no	no
CG14860	30.5012	0.15408	0.332585	0.589094	0.670348	no	no
CG14870	26.9674	2.1891	0.547322	1.1215e-06	3.15058e-06	yes	yes
CG14879	93.7738	-0.100418	0.211685	0.613825	0.692009	no	no
CG14905	3.54221	-0.596539	0.908471	0.176263	0.240897	no	no
CG14915	0	0	1.70566	NA	NA	no	no
CG1492	60.8339	-2.13241	0.300673	2.57707e-14	1.26279e-13	yes	no
CG14921	1.35406	0.34563	0.847818	0.391517	0.479398	no	no
CG14931	8.52936	-0.0602306	0.898288	0.873778	0.907738	no	no
CG1494	3.46613	-4.27276	1.86364	0.000268749	0.000582379	no	no
CG14945	392.861	0.840068	0.154819	1.70578e-08	5.62909e-08	no	no
CG14946	13014.4	-0.991695	0.0925098	1.48907e-27	1.43953e-26	no	no
CG14958	0	0	1.70566	NA	NA	no	no
CG14968	47.458	0.675201	0.267714	0.00509557	0.0092909	no	no
CG14969	575.095	-1.31798	0.101688	1.34915e-39	2.03744e-38	yes	no
CG14971	606.613	1.04126	0.087543	1.93552e-33	2.33047e-32	no	no
CG14985	354.325	0.726858	0.145399	2.36281e-07	7.09638e-07	no	no
CG15012	901.605	0.644984	0.117926	2.28953e-08	7.45244e-08	no	no
CG15014	239.451	-0.534537	0.139068	7.61926e-05	0.000176484	no	no
CG15019	429.574	-1.96075	0.184784	6.65851e-28	6.51948e-27	yes	no
CG15024	0.309431	0	1.21477	1	1	no	no
CG15027	198.668	0.692247	0.172407	2.62762e-05	6.45851e-05	no	no
CG15034	0.524822	-0.221889	1.1707	0.566532	0.649653	no	no
CG15035	1.80758	-1.35573	1.55648	0.0331464	0.0527855	no	no
CG15036	1566.05	4.76248	0.320409	1.10955e-50	2.38219e-49	yes	yes
CG1504	2.41325	0.214158	0.849467	0.581895	0.663569	no	no
CG15044	7.86637	4.74899	1.25773	5.3927e-06	1.41459e-05	no	no
CG15073	263.48	0.0666348	0.164433	0.674074	0.744084	no	no
CG15080	14.8999	1.44697	0.580038	0.000711329	0.00146712	no	no
CG15082	147.834	-0.717264	0.162821	4.40927e-06	1.17215e-05	no	no
CG15083	1902.71	1.73105	0.108687	1.4486e-58	3.75933e-57	yes	no
CG15084	107.467	-0.935549	0.215903	3.18905e-06	8.57579e-06	no	no
CG15087	733.775	0.713459	0.117699	5.78111e-10	2.14773e-09	no	no
CG15093	712.66	-0.102714	0.107146	0.330141	0.414986	no	no
CG15096	1582.62	-0.0832847	0.117689	0.470776	0.560028	no	no
CG15097	46.8347	-0.604739	0.271264	0.0131346	0.0224839	no	no
CG15098	11874.7	1.0222	0.0609467	6.37367e-64	1.85183e-62	no	no
CG15099	4665.57	0.641094	0.067911	1.93425e-21	1.41457e-20	no	no
CG15100	683.466	-0.215798	0.137434	0.106985	0.153283	no	no
CG15109	1.4061	-0.245396	0.940352	0.533703	0.617303	no	no
CG15111	1263.28	0.922885	0.0685389	5.77087e-42	9.40582e-41	no	no
CG15115	0.13806	0	1.21477	1	NA	no	no
CG15116	0.072818	-0.0417889	1.21731	0.908135	NA	no	no
CG15117	420.245	0.891642	0.154611	2.03496e-09	7.22369e-09	no	no
CG15120	76.5899	-1.20268	0.229573	1.5223e-08	5.03602e-08	no	no
CG15125	0	0	1.70566	NA	NA	no	no
CG15127	0	0	1.70566	NA	NA	no	no
CG15128	2.37491	1.41332	1.48127	0.0269559	0.0435498	no	no
CG15130	12.043	0.651591	0.468828	0.0661269	0.0994135	no	no
CG15136	0.269403	-0.201622	1.2593	0.5905	NA	no	no
CG15141	233.221	0.000911147	0.130888	0.994314	1	no	no
CG15142	0.307049	-0.23595	1.25486	0.536538	0.619778	no	no
CG15147	0.171371	0	1.21477	1	NA	no	no
CG15152	0.14443	-0.115492	1.2298	0.752373	NA	no	no
CG15153	0	0	1.70566	NA	NA	no	no
CG15155	6.19816	6.14702	1.38941	3.07474e-07	9.13706e-07	no	no
CG1516	13741.2	-0.831404	0.0681688	1.01028e-34	1.27381e-33	no	no
CG15161	95.8185	-0.617815	0.195239	0.000806101	0.00165112	no	no
CG15167	0	0	1.70566	NA	NA	no	no
CG15168	1139.02	0.912295	0.133793	2.17469e-12	9.42132e-12	no	no
CG1518	2188.7	0.875947	0.0703039	3.34276e-36	4.54717e-35	no	no
CG15198	0.13806	0	1.21477	1	NA	no	no
CG15201	2286.87	0.0588323	0.133654	0.65193	0.724577	no	no
CG15202	487.659	-1.83804	0.11506	5.90858e-59	1.54084e-57	yes	no
CG15208	1.38315	1.03666	1.56654	0.0689685	0.103221	no	no
CG15209	113.329	3.0193	0.219994	2.44737e-44	4.31803e-43	yes	yes
CG15210	21.9711	0.545392	0.358046	0.0689963	0.103234	no	no
CG15211	774.841	2.30937	0.16189	6.23216e-48	1.23397e-46	yes	yes
CG15213	18.3378	2.85907	0.544538	3.03615e-09	1.05948e-08	yes	yes
CG15219	0.417976	-0.188334	1.10333	0.625689	0.701706	no	no
CG15221	0.872388	-0.293727	1.08714	0.46492	0.554173	no	no
CG15227	0	0	1.70566	NA	NA	no	no
CG15247	67.7461	0.485034	0.288484	0.0584584	0.0887081	no	no
CG15249	25.4623	0.345597	0.890069	0.393852	0.480935	no	no
CG15255	0.936068	0.349582	0.974994	0.392834	0.48057	no	no
CG15258	0	0	1.70566	NA	NA	no	no
CG15262	0.072818	-0.0417889	1.21731	0.908135	NA	no	no
CG15263	0	0	1.70566	NA	NA	no	no
CG15269	3.86628	-3.41847	1.76156	0.000781476	0.00160437	no	no
CG15279	1094.1	-4.74938	0.133972	5.88423e-276	1.3677e-273	yes	yes
CG15283	0	0	1.70566	NA	NA	no	no
CG15296	0.920403	-0.531478	1.19477	0.234589	0.309811	no	no
CG15309	116.805	-0.324565	0.210042	0.100091	0.144266	no	no
CG15317	66.2769	0.847485	0.227664	5.5792e-05	0.0001318	no	no
CG1532	2484.92	0.159808	0.0798738	0.0435509	0.0680968	no	no
CG15322	21.3069	-4.17075	0.647605	1.33926e-11	5.51592e-11	yes	yes
CG15330	0	0	1.70566	NA	NA	no	no
CG15337	13.2653	-4.41729	0.980579	3.7673e-07	1.10781e-06	yes	yes
CG15347	176.437	1.74672	0.164827	1.01897e-27	9.92242e-27	yes	no
CG15357	0	0	1.70566	NA	NA	no	no
CG15358	0.167803	0	1.21477	1	NA	no	no
CG15369	30.3829	3.30948	0.452282	1.17458e-14	5.86301e-14	yes	yes
CG15370	1.69822	-0.167307	0.801082	0.662996	0.734361	no	no
CG15373	1.25607	-0.765894	1.52052	0.126971	0.179242	no	no
CG15387	33.9818	0.200733	0.307476	0.456559	0.546155	no	no
CG15390	87.957	0.0360782	0.235004	0.868415	0.903219	no	no
CG15394	1064.76	-3.31686	0.0956682	1.67419e-264	3.72925e-262	yes	yes
CG15395	0.223632	0.22136	1.27691	0.556052	NA	no	no
CG15398	0	0	1.70566	NA	NA	no	no
CG15399	3.07907	-2.68092	1.79808	0.00299252	0.005659	no	no
CG15403	0	0	1.70566	NA	NA	no	no
CG15404	0	0	1.70566	NA	NA	no	no
CG15414	4.05598	0.294533	0.657311	0.445756	0.535408	no	no
CG1542	191.087	-0.686835	0.15775	6.0365e-06	1.57728e-05	no	no
CG15422	1.02672	-0.931462	1.5178	0.0868464	0.127655	no	no
CG15423	5.2852	-5.07909	1.73299	4.95399e-05	0.000117917	no	no
CG15425	0.267747	0.130477	1.23913	0.72183	NA	no	no
CG15429	0.0716119	-0.0417889	1.21731	0.908135	NA	no	no
CG15432	133.285	-0.150044	0.1872	0.400193	0.487897	no	no
CG15434	0.336927	0.0470299	1.1861	0.897885	0.925825	no	no
CG15435	119.5	0.0521169	0.203654	0.786436	0.836008	no	no
CG15439	325.749	0.803118	0.108715	5.02398e-14	2.41966e-13	no	no
CG15440	361.538	0.171529	0.133472	0.187798	0.255138	no	no
CG15445	913.001	0.185323	0.0838397	0.0256162	0.0415991	no	no
CG15450	0	0	1.70566	NA	NA	no	no
CG15452	0	0	1.70566	NA	NA	no	no
CG15458	0.0716119	-0.0417889	1.21731	0.908135	NA	no	no
CG15461	1.90963	0.498382	1.10092	0.255357	0.333612	no	no
CG15471	0	0	1.70566	NA	NA	no	no
CG15475	0.387413	-0.196795	1.20299	0.604937	0.684008	no	no
CG15479	4.59022	-2.95842	1.53211	0.000932774	0.00189389	no	no
CG15480	0.382638	-0.171325	1.24638	0.644495	0.718255	no	no
CG15483	0	0	1.70566	NA	NA	no	no
CG15485	0.0898009	-0.0417889	1.21731	0.908135	NA	no	no
CG15497	37.9758	-8.57814	1.23226	2.00849e-14	9.91448e-14	yes	yes
CG1550	588.656	-0.0741871	0.0839041	0.371999	0.459604	no	no
CG15506	150.969	5.39012	0.310194	1.61484e-68	5.10823e-67	yes	yes
CG15515	3.14771	-3.71745	1.81389	0.000551998	0.00115544	no	no
CG1552	3.16303	0.492231	0.974909	0.253324	0.331198	no	no
CG15522	21.4934	0.163581	0.349083	0.578959	0.661632	no	no
CG15525	129.512	-0.13416	0.192238	0.4627	0.552171	no	no
CG15536	57.0476	-1.20469	0.27768	1.36587e-06	3.81502e-06	no	no
CG15537	8.65353	0.69422	0.781011	0.112293	0.159999	no	no
CG15543	0	0	1.70566	NA	NA	no	no
CG15545	16.2909	-6.28818	1.2774	3.04979e-08	9.79818e-08	yes	yes
CG15548	0.0939444	0.130477	1.23913	0.721831	NA	no	no
CG15549	0	0	1.70566	NA	NA	no	no
CG15550	0.483133	0.270838	1.20897	0.490711	0.580514	no	no
CG15554	12.322	-6.83582	1.29737	3.2951e-09	1.14683e-08	yes	yes
CG15556	2215.99	0.495355	0.0711239	2.2648e-12	9.78788e-12	no	no
CG15561	143.606	0.60403	0.182048	0.000487775	0.00102704	no	no
CG15571	0.238374	-0.0282123	1.21184	0.937958	NA	no	no
CG15576	0	0	1.70566	NA	NA	no	no
CG15577	0.232004	0.130477	1.23913	0.72183	NA	no	no
CG15579	0.722088	-0.584068	1.34928	0.202916	0.272971	no	no
CG15594	1.26222	-1.1722	1.65043	0.0524111	0.0804449	no	no
CG15602	389.867	-0.70379	0.149449	1.08026e-06	3.03791e-06	no	no
CG15605	0	0	1.70566	NA	NA	no	no
CG15614	2.64004	1.30749	1.28823	0.0280854	0.0452242	no	no
CG15615	1.26462	0.247146	0.841577	0.528374	0.612597	no	no
CG15617	0.754689	0.454892	1.25783	0.290264	0.373376	no	no
CG15618	217.595	-1.06699	0.1602	3.85935e-12	1.64793e-11	no	no
CG15625	3.20202	-0.918825	1.08986	0.0706964	0.105536	no	no
CG15628	336.736	-0.249636	0.11648	0.0289567	0.0465391	no	no
CG15629	30.5339	-2.30888	0.411279	3.34088e-10	1.26132e-09	yes	yes
CG15638	0.422585	-0.224313	1.20616	0.559833	0.643212	no	no
CG15641	0	0	1.70566	NA	NA	no	no
CG15642	20.4625	0.160432	0.347865	0.585416	0.667015	no	no
CG15643	49.2085	0.48488	0.275418	0.0498036	0.0769064	no	no
CG15649	0.965689	0.867398	1.39932	0.0988465	0.142781	no	no
CG15651	58.971	-0.270523	0.228856	0.203391	0.273542	no	no
CG15653	38.3215	-1.56476	0.363215	6.71421e-07	1.93187e-06	no	no
CG15657	0	0	1.70566	NA	NA	no	no
CG15673	1610.26	0.331283	0.122756	0.00583574	0.0105648	no	no
CG15696	3.58266	-4.4107	1.81201	0.000189298	0.000418177	no	no
CG15704	0	0	1.70566	NA	NA	no	no
CG15706	291.353	-1.87877	0.14194	1.55353e-41	2.50156e-40	yes	no
CG1571	1.36185	-0.374788	0.905841	0.360567	0.447444	no	no
CG15710	0	0	1.70566	NA	NA	no	no
CG15711	0	0	1.70566	NA	NA	no	no
CG15712	0	0	1.70566	NA	NA	no	no
CG15715	522.337	0.190143	0.143603	0.173069	0.236994	no	no
CG15717	177.985	-1.17014	0.213375	4.29126e-09	1.47912e-08	no	no
CG15719	0	0	1.70566	NA	NA	no	no
CG1572	1717.27	0.061948	0.116071	0.586692	0.668042	no	no
CG15728	0.167803	0	1.21477	1	NA	no	no
CG15734	5.46248	-5.40695	1.51797	8.66875e-06	2.23125e-05	no	no
CG15735	998.18	0.701157	0.0896677	2.37206e-15	1.23597e-14	no	no
CG15739	23.4205	-1.37943	0.499474	0.000369573	0.000787461	yes	no
CG15743	537.161	1.40298	0.139419	4.45471e-25	3.82876e-24	yes	no
CG15747	233.433	0.314574	0.143955	0.024448	0.0399081	no	no
CG15754	0	0	1.70566	NA	NA	no	no
CG15756	0	0	1.70566	NA	NA	no	no
CG15766	50.4542	1.4315	0.310513	2.15367e-07	6.50113e-07	yes	no
CG15771	1817.51	-0.138627	0.102292	0.169184	0.232051	no	no
CG15772	39.1384	0.488966	0.275097	0.0476914	0.0739653	no	no
CG15773	3.67412	-0.0389494	0.573578	0.915824	0.939911	no	no
CG15800	0.593127	-0.151954	1.12995	0.689439	0.756737	no	no
CG15814	757.036	0.215274	0.0877727	0.0131771	0.0225495	no	no
CG1582	1531.54	0.0437588	0.0813472	0.587264	0.66855	no	no
CG15824	9.21005	-1.9283	0.750976	0.000261625	0.000567864	no	no
CG15829	11.4009	-0.327471	0.442403	0.334706	0.419905	no	no
CG15863	91.8744	-0.0415209	0.23082	0.846492	0.884365	no	no
CG15864	21.4594	-4.02384	0.686285	3.9166e-10	1.47348e-09	yes	yes
CG15865	0.072818	-0.0417889	1.21731	0.908135	NA	no	no
CG15873	0.187889	0.199454	1.26716	0.59303	NA	no	no
CG15876	0	0	1.70566	NA	NA	no	no
CG15877	190.282	-0.348834	0.175124	0.0374825	0.0591619	no	no
CG15878	0.890187	-0.38343	1.13246	0.358225	0.444946	no	no
CG15890	6755.05	-0.632397	0.111557	7.51854e-09	2.55363e-08	no	no
CG15891	361.434	0.418467	0.180755	0.015248	0.0257798	no	no
CG15892	16.2552	-0.283254	0.380676	0.363474	0.450529	no	no
CG15896	118.87	0.504021	0.17068	0.00205528	0.0039609	no	no
CG15905	0	0	1.70566	NA	NA	no	no
CG15912	61.5175	-0.188283	0.231316	0.380629	0.468121	no	no
CG15914	108.644	-0.316436	0.189165	0.0785204	0.116344	no	no
CG15923	215.615	-1.02127	0.170852	3.72976e-10	1.40418e-09	no	no
CG15925	0	0	1.70566	NA	NA	no	no
CG15927	1.55547	0.803634	1.08117	0.100612	0.14494	no	no
CG1597	955.32	0.16232	0.0894525	0.0665515	0.0999395	no	no
CG1602	205.504	0.166605	0.150505	0.253396	0.331212	no	no
CG1603	306.258	-0.0378947	0.1452	0.788216	0.837303	no	no
CG1607	2477.29	3.84747	0.103573	9.14323e-303	2.44399e-300	yes	yes
CG1620	894.555	-0.679507	0.0755432	1.12033e-19	7.53369e-19	no	no
CG1636	650.454	-0.327089	0.0997873	0.000886286	0.00180361	no	no
CG1640	3421.44	-0.183051	0.0800762	0.0210958	0.0348618	no	no
CG1648	5549.71	-0.896468	0.114765	1.41489e-15	7.45219e-15	no	no
CG1662	391.943	0.19904	0.122996	0.0984316	0.142384	no	no
CG1665	728.577	0.545225	0.098783	2.13089e-08	6.95465e-08	no	no
CG1667	346.523	-1.84851	0.134495	1.65624e-44	2.95141e-43	yes	no
CG16704	92.955	3.17201	0.250194	3.64865e-38	5.27181e-37	yes	yes
CG1671	421.368	-0.265659	0.114263	0.0178949	0.0299893	no	no
CG16712	6387.25	-1.79147	0.111937	3.89555e-59	1.02589e-57	yes	no
CG16713	3102.92	2.0571	0.123591	7.58232e-64	2.19109e-62	yes	no
CG16716	0.338133	0.0470933	1.18553	0.897767	0.925825	no	no
CG16717	178.027	-1.95188	0.176815	6.32611e-30	6.63126e-29	yes	no
CG16719	0	0	1.70566	NA	NA	no	no
CG16721	1411.51	0.0606893	0.116884	0.596792	0.676803	no	no
CG1673	196.127	-0.438429	0.151234	0.00272941	0.00518714	no	no
CG16734	252.246	1.42833	0.140285	1.26242e-25	1.11552e-24	yes	no
CG16736	10.0605	1.13484	0.707022	0.0128459	0.0220534	no	no
CG16739	1.74104	-0.524373	0.921166	0.224836	0.298434	no	no
CG16741	0	0	1.70566	NA	NA	no	no
CG16743	78.6237	-2.14077	0.276027	1.71981e-16	9.58717e-16	yes	yes
CG16749	15.9486	-0.0783913	0.487772	0.823759	0.86536	no	no
CG16753	56.8174	-0.955568	0.293611	0.000228954	0.000500609	no	no
CG16762	84.7851	-4.74985	0.368195	8.61601e-39	1.2689e-37	yes	yes
CG16771	263.176	0.585799	0.122059	9.1478e-07	2.60544e-06	no	no
CG16782	6.9411	-4.71697	1.46345	2.67599e-05	6.56835e-05	yes	yes
CG16787	158.251	-0.330792	0.154865	0.0271269	0.0437731	no	no
CG16790	118.177	-3.58382	0.253471	2.47991e-46	4.54028e-45	yes	yes
CG16800	0	0	1.70566	NA	NA	no	no
CG16812	371.899	-0.239711	0.103967	0.0192543	0.0320564	no	no
CG16826	4.61107	-1.09639	1.17407	0.0448118	0.0699456	no	no
CG16833	818.046	-0.177146	0.0943788	0.0574121	0.0872938	no	no
CG16836	196.651	-1.89681	0.579817	2.60194e-05	6.39834e-05	yes	no
CG16837	0	0	1.70566	NA	NA	no	no
CG16854	0	0	1.70566	NA	NA	no	no
CG16865	136.381	-0.762836	0.203701	6.54998e-05	0.000153445	no	no
CG1688	50.419	-0.5722	0.278928	0.0217741	0.0358608	no	no
CG16890	157.383	-0.350908	0.172947	0.0342639	0.0544029	no	no
CG16892	153.593	0.168665	0.170473	0.303034	0.386824	no	no
CG16894	0	0	1.70566	NA	NA	no	no
CG16896	279.912	-1.45082	0.130769	6.7503e-30	7.04826e-29	yes	no
CG16898	160.157	-1.59139	1.13686	0.00883803	0.0155319	no	no
CG1690	0	0	1.70566	NA	NA	no	no
CG16926	154.484	-1.75232	0.372513	7.49362e-08	2.35099e-07	yes	no
CG16935	1380.69	0.371942	0.0816154	4.2076e-06	1.11965e-05	no	no
CG16947	305.741	-0.188018	0.14934	0.194133	0.26261	no	no
CG16952	1054.18	0.443469	0.0865071	2.18801e-07	6.59735e-07	no	no
CG16956	0.430603	-0.00340902	1.13638	0.992661	1	no	no
CG16957	0	0	1.70566	NA	NA	no	no
CG16959	578.163	-0.982507	0.165697	5.68738e-10	2.11438e-09	no	no
CG16974	4481.67	0.649187	0.0699534	8.62306e-21	6.12203e-20	no	no
CG16979	879.502	0.264622	0.0846988	0.001601	0.0031409	no	no
CG1698	263.975	-2.03624	0.196613	8.88199e-27	8.2436e-26	yes	no
CG16985	366.667	0.0640517	0.172084	0.698267	0.763538	no	no
CG16986	339.249	0.471908	0.124713	0.000108296	0.000246468	no	no
CG16995	0.13806	0	1.21477	1	NA	no	no
CG17003	0.0939444	0.130477	1.23913	0.721831	NA	no	no
CG17005	5.92304	1.78255	0.923691	0.00191858	0.0037189	no	no
CG17010	0.636955	-0.176197	1.03319	0.648635	0.721516	no	no
CG1703	1736.24	-0.347111	0.0893868	8.58059e-05	0.000197129	no	no
CG17036	66.209	0.0339807	0.257903	0.885154	0.916801	no	no
CG17047	5.4075	-1.19285	0.829433	0.0156916	0.0264713	no	no
CG17048	0	0	1.70566	NA	NA	no	no
CG17059	260.566	0.00410677	0.229383	0.984642	0.994689	no	no
CG17065	348.879	-0.719386	0.139444	1.04103e-07	3.23754e-07	no	no
CG1707	784.596	-0.603936	0.0855206	9.21485e-13	4.09158e-12	no	no
CG17075	155.402	-0.0675095	0.151521	0.645661	0.719255	no	no
CG17083	0	0	1.70566	NA	NA	no	no
CG17119	593.277	0.670314	0.133481	2.43131e-07	7.28985e-07	no	no
CG17121	763.153	-1.89339	0.102232	4.07443e-78	1.54482e-76	yes	no
CG17122	27.6583	-0.44507	0.329052	0.115592	0.164393	no	no
CG17124	122.42	-0.53159	0.175728	0.00154391	0.00303559	no	no
CG17127	1188.98	6.34586	0.382645	4.46016e-63	1.28194e-61	yes	yes
CG17154	0.922536	-0.0612605	1.04927	0.871027	0.905056	no	no
CG17163	100.712	1.13445	0.187829	1.76394e-10	6.80377e-10	no	no
CG17168	568.706	-0.514622	0.098276	1.08222e-07	3.35979e-07	no	no
CG17180	145.005	-0.103598	0.155478	0.490932	0.580518	no	no
CG17186	93.3936	-0.645564	0.212594	0.00115621	0.0023159	no	no
CG17187	89.7597	-1.48226	0.235667	1.51449e-11	6.21847e-11	no	no
CG17190	438.506	-1.43015	0.106211	1.31778e-42	2.18107e-41	yes	no
CG17193	0.892793	-0.0684862	0.997535	0.856608	0.89307	no	no
CG17199	0	0	1.70566	NA	NA	no	no
CG17202	286.39	-0.472916	0.146241	0.000848215	0.00172943	no	no
CG17209	575.783	0.349429	0.113303	0.00168489	0.003297	no	no
CG1722	36.3173	-3.89503	0.564684	5.26829e-13	2.37874e-12	yes	yes
CG17230	148.107	-1.90382	0.197868	1.73151e-23	1.40893e-22	yes	no
CG17237	0.664848	0.426649	1.1223	0.315884	0.399413	no	no
CG17242	0.167803	0	1.21477	1	NA	no	no
CG17244	55.6075	-0.59019	0.302716	0.0263245	0.0426198	no	no
CG17249	309.483	0.3424	0.132917	0.00825621	0.0145958	no	no
CG17258	11.6485	-1.01582	0.593373	0.0138806	0.0236249	no	no
CG17259	1434.14	0.284879	0.0737415	9.91083e-05	0.000226521	no	no
CG17264	427.737	-10.0472	0.845335	6.10794e-35	7.84929e-34	yes	yes
CG17266	67.9933	-1.37851	0.262524	9.03651e-09	3.05368e-08	no	no
CG17272	654.651	0.544246	0.126221	1.00566e-05	2.56379e-05	no	no
CG17283	0.179496	0.0435748	1.21754	0.904239	NA	no	no
CG17287	0	0	1.70566	NA	NA	no	no
CG17294	236.205	-0.426577	0.141739	0.00194649	0.0037689	no	no
CG17300	0	0	1.70566	NA	NA	no	no
CG17321	69.6934	-0.915989	0.259848	9.67368e-05	0.000221385	no	no
CG17325	628.762	-2.22774	0.423485	2.5105e-09	8.83552e-09	yes	yes
CG17327	213.272	-1.29366	0.16655	5.72939e-16	3.10327e-15	no	no
CG17328	108.383	-0.16759	0.188688	0.350803	0.437154	no	no
CG17329	2.76173	-0.676511	1.12687	0.151724	0.210625	no	no
CG17349	0.232004	0.130477	1.23913	0.72183	NA	no	no
CG17350	5095.59	1.50331	0.0893328	7.10902e-65	2.12317e-63	yes	no
CG1737	1165.62	0.128451	0.0807835	0.108636	0.155327	no	no
CG17378	104	-0.794731	0.197247	1.86577e-05	4.6653e-05	no	no
CG1738	50.6579	-0.444059	0.298721	0.0918063	0.134207	no	no
CG17385	658.912	-0.0593709	0.0901864	0.505625	0.593216	no	no
CG17386	38.9515	1.36358	0.349757	6.15895e-06	1.6077e-05	yes	no
CG17404	0.701424	-0.412768	1.34571	0.318982	0.402663	no	no
CG17454	1196.95	0.0712213	0.146746	0.617158	0.694888	no	no
CG1746	18249.7	-0.0373837	0.0985312	0.700628	0.765806	no	no
CG17470	5.61773	-3.54312	1.54852	0.000332869	0.000714093	no	no
CG17475	0.072818	-0.0417889	1.21731	0.908135	NA	no	no
CG17493	2385.6	1.23497	0.0989942	8.38384e-37	1.15516e-35	no	no
CG17528	3649.87	0.208747	0.0831826	0.0112883	0.0195615	no	no
CG17544	2330.22	0.52104	0.103491	3.12584e-07	9.28373e-07	no	no
CG17564	0.14443	-0.115492	1.2298	0.752373	NA	no	no
CG17568	210.332	0.672305	0.146424	2.06849e-06	5.65346e-06	no	no
CG17570	0	0	1.70566	NA	NA	no	no
CG17572	2032.38	-0.46503	0.0965656	1.05027e-06	2.9645e-06	no	no
CG17580	0.187889	0.199454	1.26716	0.59303	NA	no	no
CG17593	2091.21	0.617569	0.0783005	1.68835e-15	8.84894e-15	no	no
CG17597	1183.97	1.02587	0.106075	6.4476e-23	5.09141e-22	no	no
CG17598	1328.79	0.852966	0.0901405	8.67646e-22	6.47826e-21	no	no
CG17599	218.796	0.430372	0.147794	0.00265197	0.00504904	no	no
CG17625	0.407217	-0.0417875	1.21731	0.908138	0.933967	no	no
CG17633	1.71071	-0.267008	0.92308	0.500696	0.588937	no	no
CG17636	0.420116	-0.0339819	1.15136	0.926767	0.947643	no	no
CG1764	218.015	0.839144	0.136247	2.18595e-10	8.37112e-10	no	no
CG17648	0	0	1.70566	NA	NA	no	no
CG17650	3.08627	-3.90146	1.95412	0.000574938	0.00120251	no	no
CG17652	131.931	-0.569517	0.216327	0.00479283	0.00879289	no	no
CG17658	25.1338	3.43016	0.811452	6.59431e-07	1.89942e-06	no	no
CG17669	4.11763	-0.533458	0.682783	0.190308	0.258089	no	no
CG17672	2.2693	-1.11299	1.25748	0.0468479	0.0728473	no	no
CG17680	241.485	-0.552214	0.137113	3.43546e-05	8.35577e-05	no	no
CG17681	107.725	7.58746	0.868357	2.91949e-20	2.01909e-19	yes	yes
CG17683	3714.47	0.917649	0.0574644	4.92233e-58	1.25908e-56	no	no
CG17707	1043.46	-0.827317	0.470849	0.021086	0.0348565	no	no
CG17717	2.18989	-1.52383	1.58533	0.0231577	0.0379525	no	no
CG17737	1926.6	0.929589	0.101634	1.31967e-20	9.27064e-20	no	no
CG17738	0.790816	-0.0135302	1.04	0.971326	0.983654	no	no
CG17754	444.655	0.1365	0.183944	0.43684	0.525743	no	no
CG17760	7.51527	-1.31471	0.739235	0.00598272	0.0108116	no	no
CG17765	889.501	-0.963326	0.110124	4.35663e-19	2.81287e-18	no	no
CG17776	155.987	0.132214	0.250409	0.564691	0.648237	no	no
CG17778	49.2029	0.252841	0.249569	0.26909	0.348671	no	no
CG17780	0.106678	0.130477	1.23913	0.721831	NA	no	no
CG17784	0	0	1.70566	NA	NA	no	no
CG17819	0.451201	0.0110373	1.13543	0.976249	0.986397	no	no
CG17829	123.858	-0.676685	0.195945	0.000251171	0.000546281	no	no
CG17834	2253.15	-0.305293	0.0842685	0.000252951	0.000549928	no	no
CG17840	566.862	0.289812	0.0999246	0.00326906	0.00614501	no	no
CG17843	439.76	0.524168	0.134067	5.92895e-05	0.000139631	no	no
CG1785	478.563	-0.0795063	0.114588	0.479922	0.569515	no	no
CG17855	3.23185	-0.643861	0.765976	0.13416	0.188296	no	no
CG1789	237.37	-0.125476	0.158835	0.413418	0.502188	no	no
CG17896	2095.83	-0.293525	0.121232	0.0134475	0.0229756	no	no
CG17904	531.881	-0.47015	0.119293	5.71722e-05	0.000134704	no	no
CG17917	0.477233	0	1.12441	1	1	no	no
CG17919	12277.3	0.644285	0.05384	2.75115e-33	3.26112e-32	no	no
CG17944	0	0	1.70566	NA	NA	no	no
CG17959	0.14443	-0.115492	1.2298	0.752373	NA	no	no
CG17982	181.625	0.347065	0.143313	0.0126543	0.0217523	no	no
CG17985	330.447	-0.252977	0.125599	0.0394962	0.0621751	no	no
CG17994	63.0813	0.584386	0.294098	0.0245404	0.0400466	no	no
CG17996	116.324	-0.503411	0.196723	0.00677262	0.0121539	no	no
CG18011	288.598	-0.901702	0.13886	2.05174e-11	8.37936e-11	no	no
CG18031	3.05586	-2.57298	1.79624	0.00362595	0.00675882	no	no
CG18063	1.7766	-0.727033	1.10586	0.12918	0.181848	no	no
CG1809	5.24568	-1.2211	0.837172	0.0142387	0.0241882	no	no
CG18095	2.51334	3.64894	2.13879	0.0011471	0.00230108	no	no
CG1812	283.84	-0.701182	0.148173	9.71903e-07	2.75055e-06	no	no
CG18132	0	0	1.70566	NA	NA	no	no
CG18135	2134.59	0.429475	0.126296	0.000501355	0.00105438	no	no
CG18136	55.2356	-0.731035	0.262491	0.00204778	0.00394786	no	no
CG18155	29.163	0.258436	0.320726	0.352487	0.438844	no	no
CG18179	592.759	2.66645	0.174803	2.83849e-54	6.54077e-53	yes	yes
CG18190	19.9144	-0.252614	0.9809	0.523345	0.607558	no	no
CG18268	81.1392	0.0236381	0.238471	0.914621	0.939397	no	no
CG18269	0	0	1.70566	NA	NA	no	no
CG18273	484.846	-0.197303	0.105274	0.0570242	0.0867534	no	no
CG18278	552.58	-0.109195	0.108844	0.307893	0.391531	no	no
CG18292	227.752	-0.313489	0.130096	0.0135918	0.0232072	no	no
CG1835	6.22498	-2.58663	1.31235	0.000957274	0.00194068	no	no
CG18371	1.54383	-0.678166	1.10723	0.149756	0.208276	no	no
CG1840	265.275	1.60245	0.208798	6.47867e-16	3.48791e-15	yes	no
CG18418	0	0	1.70566	NA	NA	no	no
CG18446	17.3697	-0.127809	0.549323	0.726977	0.786247	no	no
CG18449	0.631811	0.271876	1.18015	0.491397	0.580682	no	no
CG18467	3.41683	-0.490809	0.707172	0.228125	0.30217	no	no
CG1847	206.018	-0.391697	0.143583	0.00495674	0.00905631	no	no
CG18473	6.37971	0.458117	0.55892	0.226414	0.300201	no	no
CG18480	0.357785	0.054606	1.17379	0.882109	0.91426	no	no
CG1850	1.44302	-1.33466	1.52967	0.0340659	0.0541207	no	no
CG18507	2269.96	-0.525801	0.109051	9.20276e-07	2.6197e-06	no	no
CG18536	6.39128	-5.72645	1.40435	1.46669e-06	4.08169e-06	no	no
CG18537	0.196479	0.0435748	1.21754	0.904239	NA	no	no
CG18539	0.187889	0.199454	1.26716	0.59303	NA	no	no
CG18568	0.614117	-0.351079	1.15501	0.392937	0.480586	no	no
CG18577	0.072818	-0.0417889	1.21731	0.908135	NA	no	no
CG18599	0	0	1.70566	NA	NA	no	no
CG18609	0.281284	-0.114494	1.2296	0.75439	0.808372	no	no
CG18622	266.689	-2.05492	0.143444	3.44542e-48	6.89858e-47	yes	no
CG18624	792.995	-0.122175	0.0913641	0.176177	0.240893	no	no
CG18643	54.6168	0.0182273	0.248281	0.93629	0.954865	no	no
CG18661	107.914	0.183283	0.2011	0.335067	0.42019	no	no
CG18662	2.30034	0.112264	0.692847	0.76668	0.81909	no	no
CG18666	0.072818	-0.0417889	1.21731	0.908135	NA	no	no
CG18731	214.083	0.0408412	0.161406	0.793139	0.841461	no	no
CG18766	736.272	0.152333	0.0936521	0.0996974	0.143855	no	no
CG18808	2.69287	-0.870838	0.996951	0.0751787	0.111671	no	no
CG18810	1.93889	1.26721	1.49364	0.0388471	0.0612255	no	no
CG18812	7770.93	0.801141	0.0616936	5.02282e-39	7.47966e-38	no	no
CG1885	331.462	1.47404	0.180892	1.78028e-17	1.05514e-16	yes	no
CG18858	1599.85	0.549582	0.0918976	1.38687e-09	4.97263e-09	no	no
CG18869	2.82413	0.759025	0.850525	0.0950425	0.138408	no	no
CG1888	350.369	-0.369636	0.131725	0.00402175	0.00743697	no	no
CG1890	252.801	1.02714	0.163502	5.3886e-11	2.14661e-10	no	no
CG1902	1092.26	1.04723	0.0990942	6.27509e-27	5.86479e-26	no	no
CG1907	1144.25	0.0422315	0.0781727	0.585921	0.667448	no	no
CG1909	364.706	-1.14992	0.113852	5.88143e-25	5.0388e-24	no	no
CG1927	6862.34	0.19842	0.0586838	0.000680592	0.0014108	no	no
CG1943	974.196	1.1651	0.121532	9.25818e-23	7.25722e-22	no	no
CG1951	634.932	0.011828	0.107147	0.910717	0.936288	no	no
CG1958	0.0939444	0.130477	1.23913	0.721831	NA	no	no
CG1968	865.013	-0.922288	0.103851	1.52409e-19	1.0172e-18	no	no
CG1970	7919.95	-0.217421	0.0527926	3.5599e-05	8.61921e-05	no	no
CG1971	51.6341	-4.49095	0.430882	3.75625e-26	3.38632e-25	yes	yes
CG1983	258.987	-0.146832	0.156756	0.332561	0.417536	no	no
CG1986	0	0	1.70566	NA	NA	no	no
CG1988	0.187889	0.199454	1.26716	0.59303	NA	no	no
CG1998	1548.16	1.71148	0.0930033	4.55766e-77	1.68036e-75	yes	no
CG2004	1106.19	0.744143	0.123454	6.56849e-10	2.43011e-09	no	no
CG2006	111.635	0.686071	0.24209	0.00198778	0.00384329	no	no
CG2021	91.8267	0.343925	0.239723	0.119745	0.169938	no	no
CG2023	244.814	0.855448	0.176871	3.70953e-07	1.09142e-06	no	no
CG2025	1124.25	0.623554	0.0840532	6.37191e-14	3.04417e-13	no	no
CG2034	226.735	-0.677679	0.142258	8.83514e-07	2.52311e-06	no	no
CG2051	576.212	0.259819	0.105344	0.0122486	0.0210956	no	no
CG2053	1.3816	1.43359	1.76956	0.0320092	0.0511267	no	no
CG2059	445.073	-0.899229	0.109211	4.4934e-17	2.59414e-16	no	no
CG2061	196.51	-0.447258	0.152592	0.00243072	0.00465091	no	no
CG2063	357.705	-1.25231	0.138769	1.4309e-20	1.00257e-19	yes	no
CG2064	358.41	2.57198	0.169512	9.04837e-54	2.04969e-52	yes	yes
CG2076	2108.63	0.0446833	0.134877	0.734125	0.792055	no	no
CG2107	1612.26	0.453551	0.0835034	4.08367e-08	1.30336e-07	no	no
CG2111	1.56497	0.196026	0.854285	0.61283	0.691179	no	no
CG2113	0	0	1.70566	NA	NA	no	no
CG2124	99.6582	0.644564	0.221188	0.00171911	0.00335414	no	no
CG2129	143.813	0.697529	0.192339	0.000124152	0.000280285	no	no
CG2135	1403.8	1.8348	0.0837769	7.98073e-108	4.68846e-106	yes	no
CG2144	822.111	-0.160966	0.100921	0.105772	0.151719	no	no
CG2145	4360.91	0.556095	0.0814868	5.45324e-12	2.30277e-11	no	no
CG2150	100.74	7.56885	0.803418	5.55409e-23	4.40537e-22	yes	yes
CG2200	250.523	-1.18512	0.139415	1.81484e-18	1.13079e-17	no	no
CG2201	2995.68	-0.785641	0.0716291	1.93742e-28	1.9216e-27	no	no
CG2224	361.648	0.792887	0.108789	1.08521e-13	5.10248e-13	no	no
CG2254	11947.6	-0.729829	0.0803074	4.19953e-20	2.88199e-19	no	no
CG2263	832.844	0.367107	0.0959424	0.000105782	0.000241054	no	no
CG2267	0.363347	-0.108798	1.21995	0.76669	0.81909	no	no
CG2291	0	0	1.70566	NA	NA	no	no
CG2316	4696.01	-0.556846	0.161054	0.000325631	0.000699688	no	no
CG2321	65.1259	-1.27007	0.293878	1.23302e-06	3.45297e-06	no	no
CG2336	0.183745	0.0435748	1.21754	0.904239	NA	no	no
CG2444	2.54907	0.286945	0.723311	0.462724	0.552171	no	no
CG2453	248.73	-0.50421	0.145619	0.000353513	0.000755347	no	no
CG2493	2357.89	-0.505356	0.111719	4.06734e-06	1.08503e-05	no	no
CG2533	0.900522	0.0847595	0.893876	0.82354	0.8653	no	no
CG2540	177.163	-1.02105	0.159793	2.73363e-11	1.10294e-10	no	no
CG2543	51.9235	-1.34352	0.29341	3.0696e-07	9.12686e-07	yes	no
CG2556	86.133	-0.0815293	0.22062	0.69269	0.758992	no	no
CG2574	0	0	1.70566	NA	NA	no	no
CG2577	0.0939444	0.130477	1.23913	0.721831	NA	no	no
Cg25C	1130.8	-0.0971926	0.113951	0.385262	0.472822	no	no
CG2604	11516.8	-0.414704	0.0778488	7.70375e-08	2.4155e-07	no	no
CG2608	142.706	-1.48876	0.165944	1.38258e-20	9.69984e-20	yes	no
CG2611	80.0863	1.75195	0.224989	2.16889e-16	1.20404e-15	yes	no
CG2614	357.38	-0.312236	0.139167	0.0211277	0.0349037	no	no
CG2617	29.3319	-1.96681	0.420484	6.34146e-08	2.00127e-07	yes	no
CG2680	32.5953	1.19072	0.392502	0.000246557	0.000537121	no	no
CG2681	4.85168	-4.53344	1.67242	9.84663e-05	0.00022515	no	no
CG2685	229.695	-0.607997	0.129625	1.49186e-06	4.14526e-06	no	no
CG2691	1026.01	0.158909	0.103441	0.11899	0.169001	no	no
CG2701	755.78	-0.393032	0.107554	0.000202817	0.000447117	no	no
CG2712	102.79	-0.326581	0.183321	0.0617558	0.093288	no	no
CG2750	1.21398	-1.2076	1.59722	0.0475737	0.0738041	no	no
CG2772	13.0872	-6.90232	1.28459	1.77287e-09	6.32695e-09	yes	yes
CG2789	4792.33	-0.250261	0.0865466	0.00347839	0.00650845	no	no
CG2794	207.813	-0.888785	0.143931	1.68634e-10	6.51855e-10	no	no
CG2807	2207.12	0.167959	0.0857441	0.0478422	0.0741236	no	no
CG2811	284.429	0.470924	0.147884	0.00100961	0.00204292	no	no
CG2816	79.172	-4.60015	0.371815	7.40787e-36	9.90061e-35	yes	yes
CG2818	686.157	-0.133613	0.0890231	0.129192	0.181848	no	no
CG2837	5.77858	-0.998262	0.874434	0.0395367	0.0622205	no	no
CG2852	6006.21	0.884404	0.0733974	5.10234e-34	6.33344e-33	no	no
CG2854	4.54883	2.4092	1.16701	0.00080076	0.00164081	no	no
CG2862	999.601	-0.326144	0.0984153	0.000780413	0.0016028	no	no
CG2875	190.874	-0.884727	0.154207	2.48039e-09	8.73529e-09	no	no
CG2889	204.778	-0.17205	0.151951	0.242414	0.318649	no	no
CG2898	11.5292	-0.370336	0.495497	0.301768	0.385573	no	no
CG2901	1.9542	0.168205	0.791078	0.66118	0.732726	no	no
CG2906	166.432	-0.261164	0.157468	0.0859782	0.126483	no	no
CG2909	239.666	0.165418	0.134677	0.207896	0.279039	no	no
CG2911	76.3159	-1.53646	0.257459	1.03325e-10	4.0467e-10	no	no
CG2918	10123.6	0.563696	0.130311	9.08875e-06	2.33038e-05	no	no
CG2921	428.856	-0.366879	0.104368	0.000356571	0.000761272	no	no
CG2924	1098.46	0.632442	0.0722281	1.0695e-18	6.74238e-18	no	no
CG2926	4126.07	0.443742	0.0731087	9.52819e-10	3.47224e-09	no	no
CG2931	270.016	-0.0804508	0.125099	0.51116	0.598546	no	no
CG2938	545.794	-0.129065	0.108002	0.22463	0.298279	no	no
CG2964	0.64204	-0.0460913	1.17665	0.900197	0.927434	no	no
CG2972	396.596	0.200801	0.121953	0.0928033	0.135443	no	no
CG2990	17.9419	-0.051099	0.581782	NA	NA	no	no
CG2991	2100.52	0.292484	0.113583	0.00873772	0.0153708	no	no
CG30008	15.4191	-0.0628903	0.485593	0.857923	0.893664	no	no
CG30015	3690.26	-0.454227	0.0735264	4.76026e-10	1.77588e-09	no	no
CG30016	3.43045	-2.8603	1.84339	0.00237342	0.0045494	no	no
CG30022	1549.3	-0.88747	0.101365	5.25573e-19	3.38113e-18	no	no
CG30033	2152.51	1.52169	0.368877	1.65001e-06	4.56335e-06	yes	no
CG30051	157.48	-0.882362	0.222536	1.87399e-05	4.68365e-05	no	no
CG30053	41.7317	0.721963	0.27311	0.00319175	0.00601236	no	no
CG30065	0.413384	-0.0337682	1.1539	0.927177	0.947712	no	no
CG3008	1225.95	-0.24105	0.0934274	0.00901199	0.0158168	no	no
CG30080	0	0	1.70566	NA	NA	no	no
CG30083	3.43309	-4.22942	1.75577	0.000212281	0.000465867	no	no
CG30093	0.660619	0.657943	1.42216	0.166662	0.228856	no	no
CG30096	51.7913	-0.581382	0.30601	0.0299902	0.0480742	no	no
CG30098	5.40843	-4.33678	1.59948	0.000103334	0.000235677	no	no
CG30099	0.598846	-0.270988	1.16506	0.493548	0.582709	no	no
CG30101	15.2687	-1.9976	0.678786	7.25189e-05	0.000168706	yes	no
CG30105	40.9378	0.0820067	0.36113	0.785533	0.835214	no	no
CG3011	1010.85	-0.844654	0.113261	2.60151e-14	1.27243e-13	no	no
CG30118	4323.61	-0.0719149	0.0849927	0.392816	0.48057	no	no
CG30122	4042.51	0.725418	0.054381	5.77212e-41	9.10259e-40	no	no
CG30148	131.933	-1.6007	0.326466	3.58848e-08	1.15081e-07	yes	no
CG30152	434.889	-0.277274	0.104142	0.00686787	0.0123083	no	no
CG30154	99.1273	0.33858	0.361807	0.262041	0.340837	no	no
CG3016	504.182	-0.279902	0.12552	0.0226251	0.037148	no	no
CG30172	6.28449	-1.31622	0.951938	0.0138406	0.0235792	no	no
CG30178	0.393417	-0.0531281	1.0898	0.887359	0.918455	no	no
CG30183	383.768	0.180647	0.107893	0.0888631	0.130297	no	no
CG30184	17.7957	3.08663	1.6333	0.000987877	0.00200045	no	no
CG30192	0.0898009	-0.0417889	1.21731	0.908135	NA	no	no
CG30197	11400.2	0.854181	0.0913264	2.45032e-21	1.78223e-20	no	no
CG3021	253.759	-0.203162	0.144229	0.147114	0.204731	no	no
CG30222	0.216042	-0.172059	1.24666	0.643148	NA	no	no
CG30268	0.355691	0.199455	1.26716	0.593028	0.673249	no	no
CG30275	0.13806	0	1.21477	1	NA	no	no
CG30291	1342.63	-0.561284	0.0878121	1.00004e-10	3.92525e-10	no	no
CG3032	64.1399	0.646854	0.246073	0.00404853	0.00748132	no	no
CG30324	0.470378	0.0513526	1.06291	0.891473	0.921999	no	no
CG30343	2.42152	-1.13433	1.32329	0.0470989	0.0731524	no	no
CG30349	639.029	0.152323	0.0848515	0.0698286	0.104362	no	no
CG30350	0.353445	0.164331	1.24396	0.657412	0.729608	no	no
CG30355	0.072818	-0.0417889	1.21731	0.908135	NA	no	no
CG30357	48.3682	-8.19056	1.22623	1.8439e-13	8.56426e-13	yes	yes
CG3036	3593.34	-0.238105	0.0890099	0.0068373	0.0122617	no	no
CG30369	0	0	1.70566	NA	NA	no	no
CG30373	287.6	-1.01993	0.130213	7.86642e-16	4.18863e-15	no	no
CG30376	0.353445	0.164331	1.24396	0.657412	0.729608	no	no
CG30377	907.528	3.49857	0.4396	1.20243e-16	6.76652e-16	yes	yes
CG3038	102.226	-1.40783	0.188816	4.90884e-15	2.51367e-14	yes	no
CG30382	2037.28	-0.13451	0.0748364	0.0701022	0.104742	no	no
CG30383	3.34951	-1.79996	1.60214	0.0127035	0.0218229	no	no
CG30391	0.339174	0	1.21477	1	1	no	no
CG30392	334.656	-0.139116	0.117838	0.228852	0.302983	no	no
CG30398	297.782	12.1415	1.18197	5.94749e-27	5.56835e-26	yes	yes
CG3040	362.755	0.351103	0.105088	0.000689035	0.00142609	no	no
CG30401	0.072818	-0.0417889	1.21731	0.908135	NA	no	no
CG30411	188.983	-3.10651	0.189917	1.63999e-61	4.54269e-60	yes	yes
CG30412	0.382804	-0.137368	1.17521	0.714097	0.776717	no	no
CG30413	0	0	1.70566	NA	NA	no	no
CG30417	0.0716119	-0.0417889	1.21731	0.908135	NA	no	no
CG30423	788.467	0.274583	0.0804967	0.000577058	0.001206	no	no
CG30428	483.581	0.388256	0.117923	0.000782931	0.00160674	no	no
CG30429	0.453148	-0.149426	1.23213	0.686301	0.754518	no	no
CG30431	26.7112	-0.0855362	0.370586	0.780059	0.830551	no	no
CG30432	0	0	1.70566	NA	NA	no	no
CG3045	128.962	-0.00690934	0.180811	0.968119	0.981336	no	no
CG30479	0.359266	-0.248065	1.28373	0.514538	0.601645	no	no
CG30487	0	0	1.70566	NA	NA	no	no
CG30491	314.405	-0.533815	0.135749	5.30294e-05	0.000125774	no	no
CG30495	416.279	-1.05611	0.144676	4.21095e-14	2.05212e-13	no	no
CG30503	564.596	2.78774	0.122488	2.5422e-116	1.72033e-114	yes	yes
CG3061	3586.22	0.887097	0.0733163	2.75146e-34	3.43676e-33	no	no
CG3062	0.907721	-0.387622	1.11568	0.353878	0.440473	no	no
CG3071	342.035	-0.304621	0.137986	0.0233548	0.0382404	no	no
CG3077	413.665	0.416272	0.127547	0.000834108	0.00170326	no	no
CG3078	46.6521	-6.12617	0.702202	1.59792e-19	1.06515e-18	yes	yes
CG3081	2.77233	-0.526637	0.777764	0.208962	0.280292	no	no
CG3088	245794	0.150147	0.138008	0.264045	0.34295	no	no
CG3092	0	0	1.70566	NA	NA	no	no
CG31007	1.29644	-0.179646	0.855086	0.641608	0.715784	no	no
CG31008	0	0	1.70566	NA	NA	no	no
CG31016	0	0	1.70566	NA	NA	no	no
CG3104	506.912	-0.474948	0.155622	0.00156752	0.0030786	no	no
CG31041	3.06288	0.1477	0.666368	0.696521	0.762097	no	no
CG31050	0	0	1.70566	NA	NA	no	no
CG31051	28.3334	-0.128569	0.319421	0.642849	0.71672	no	no
CG3106	2.67737	0.0982793	0.66506	0.794238	0.842459	no	no
CG31068	0.0939444	0.130477	1.23913	0.721831	NA	no	no
CG31093	0	0	1.70566	NA	NA	no	no
CG31125	22.5768	-0.40934	0.346884	0.163122	0.224466	no	no
CG31128	0	0	1.70566	NA	NA	no	no
CG31142	140.887	-0.21324	0.216001	0.292153	0.375535	no	no
CG31156	339.858	-1.58959	0.138107	4.8293e-32	5.51655e-31	yes	no
CG31157	5.72323	0	0.835656	1	1	no	no
CG31174	20.2472	-1.19382	1.04998	0.0271617	0.0438161	no	no
CG31178	0.410785	-0.0481628	1.15778	0.89632	0.925759	no	no
CG3119	181.22	1.76218	0.25108	6.86325e-14	3.25852e-13	yes	no
CG31200	2625.66	-4.51639	0.109176	0	0	yes	yes
CG31211	1848.91	-0.463585	0.064784	6.01757e-13	2.70336e-12	no	no
CG31226	0.0939444	0.130477	1.23913	0.721831	NA	no	no
CG31235	0.59884	0.113457	1.11293	0.763754	0.816769	no	no
CG3124	0.635278	0.29298	1.27689	0.454059	0.543651	no	no
CG31248	283.841	-5.99399	0.267552	2.69149e-112	1.69279e-110	yes	yes
CG31249	120.169	-0.451735	0.180336	0.00864542	0.0152235	no	no
CG31251	93.9574	-1.69004	0.307329	1.25555e-09	4.5383e-09	no	no
CG31259	0.713361	-0.0242081	0.953324	0.948968	0.966136	no	no
CG31275	0	0	1.70566	NA	NA	no	no
CG31278	155.176	-0.551345	0.201625	0.0036906	0.00686465	no	no
CG31286	0.35926	0.199455	1.26716	0.593028	0.673249	no	no
CG31287	4.50814	0.016999	0.625596	0.963683	0.978323	no	no
CG31301	649.545	-0.147722	0.093082	0.10827	0.154929	no	no
CG31326	2969.32	-0.304048	0.0898159	0.000617325	0.00128764	no	no
CG31337	0.530574	-0.247728	1.28053	0.515502	0.601851	no	no
CG31345	183.061	1.36994	0.162087	1.70638e-18	1.06569e-17	yes	no
CG31357	749.266	0.605044	0.0965813	2.08441e-10	7.99374e-10	no	no
CG31380	0.982623	-0.201103	0.911382	0.605127	0.684079	no	no
CG31381	55.5159	-0.409778	0.234486	0.0587584	0.0891127	no	no
CG31407	0.0939444	0.130477	1.23913	0.721831	NA	no	no
CG31437	0.0898009	-0.0417889	1.21731	0.908135	NA	no	no
CG31446	0.214836	-0.171326	1.24638	0.644493	NA	no	no
CG31463	0.187889	0.199454	1.26716	0.59303	NA	no	no
CG31464	0	0	1.70566	NA	NA	no	no
CG31468	0	0	1.70566	NA	NA	no	no
CG31477	27.413	-5.95874	0.918431	5.52553e-12	2.32961e-11	yes	yes
CG31482	3.79348	0.854107	1.10949	0.0879385	0.129118	no	no
CG3149	885.331	0.896359	0.0859814	4.78511e-26	4.29936e-25	no	no
CG31496	0.725596	-0.399008	1.1264	0.342392	0.428371	no	no
CG31522	11055.6	1.38054	0.0926478	1.87508e-51	4.07486e-50	yes	no
CG31523	25600.8	1.46237	0.0697079	5.14303e-99	2.5458e-97	yes	no
CG31528	0.338133	0.0470933	1.18553	0.897767	0.925825	no	no
CG31546	3.03732	1.56678	1.28348	0.0134019	0.0229122	no	no
CG31548	491.814	-1.65036	0.120497	4.09765e-44	7.15883e-43	yes	no
CG31550	1299.1	-0.945293	0.0863387	1.43546e-28	1.43439e-27	no	no
CG31560	0	0	1.70566	NA	NA	no	no
CG3160	728.784	0.859241	0.0946042	3.00308e-20	2.07422e-19	no	no
CG31609	0	0	1.70566	NA	NA	no	no
CG31612	31.3848	-5.28822	0.715058	1.65744e-14	8.19675e-14	yes	yes
CG3163	301.742	0.365102	0.141685	0.00801063	0.0141851	no	no
CG31644	0.260707	0.108645	1.2287	0.76625	NA	no	no
CG31646	124.917	-0.0665319	0.173235	0.688996	0.756559	no	no
CG31650	348.35	-0.56043	0.129522	9.10148e-06	2.33253e-05	no	no
CG31673	450.392	-1.38265	0.138201	8.39151e-25	7.14347e-24	yes	no
CG31674	95.5208	-2.91863	0.287446	8.35614e-26	7.45775e-25	yes	yes
CG31676	1894.95	0.230745	0.0934014	0.0123992	0.0213345	no	no
CG3168	840.544	0.1139	0.109604	0.290758	0.373832	no	no
CG31689	3402.35	1.8638	0.109136	6.49794e-67	2.01965e-65	yes	no
CG31698	0	0	1.70566	NA	NA	no	no
CG31706	74.6623	1.13326	0.28419	7.85231e-06	2.02794e-05	no	no
CG31708	16.2623	0.0994576	0.378801	0.748707	0.803732	no	no
CG31710	38.269	-0.0105725	0.323711	0.969873	0.98256	no	no
CG31728	45.7103	-2.79006	0.388486	1.40528e-14	6.9755e-14	yes	yes
CG31730	0.072818	-0.0417889	1.21731	0.908135	NA	no	no
CG31743	5064.61	-0.380584	0.0697826	3.97325e-08	1.27115e-07	no	no
CG31777	83.0761	-0.899716	0.229671	2.16414e-05	5.36867e-05	no	no
CG31778	92.2975	-3.77324	0.276976	4.33016e-43	7.3489e-42	yes	yes
CG31784	0.27612	0	1.21477	1	1	no	no
CG31787	0	0	1.70566	NA	NA	no	no
CG31788	0.0939444	0.130477	1.23913	0.721831	NA	no	no
CG31789	0.171371	0	1.21477	1	NA	no	no
CG31798	3.25237	1.55201	1.46964	0.0189268	0.03159	no	no
CG31803	3.11807	-1.03103	1.11077	0.0507967	0.0782591	no	no
CG31812	54.1851	-0.00901934	0.34661	0.975476	0.985989	no	no
CG31816	0.642173	0.413723	1.27166	0.324548	0.40882	no	no
CG31819	0.171371	0	1.21477	1	NA	no	no
CG31827	6.71273	3.9503	1.27121	3.82373e-05	9.20795e-05	no	no
CG31848	0.311026	-0.114494	1.2296	0.75439	0.808372	no	no
CG31849	22.4215	-1.20065	0.469993	0.0010688	0.00215615	no	no
CG31851	0.072818	-0.0417889	1.21731	0.908135	NA	no	no
CG31855	185.741	0.678097	0.154681	5.38433e-06	1.41309e-05	no	no
CG31862	0.106678	0.130477	1.23913	0.721831	NA	no	no
CG31867	0	0	1.70566	NA	NA	no	no
CG31869	651.133	0.339032	0.11473	0.00260648	0.00496587	no	no
CG31870	0.072818	-0.0417889	1.21731	0.908135	NA	no	no
CG31871	3030.46	0.953901	0.0932114	2.89249e-25	2.52255e-24	no	no
CG31875	5.52676	-5.32652	1.46552	7.24055e-06	1.87994e-05	no	no
CG31908	707.297	0.0146793	0.104812	0.886946	0.918384	no	no
CG31910	0.295244	0.131688	1.22448	0.720945	0.782421	no	no
CG31913	0.966275	-0.173827	1.05035	0.652555	0.725122	no	no
CG31917	421.396	0.699378	0.113031	2.72574e-10	1.03493e-09	no	no
CG3192	1646.44	-0.106453	0.107325	0.313619	0.397206	no	no
CG31922	71.9183	-1.11857	0.336664	0.000110731	0.000251686	no	no
CG31928	0.17829	0.0435748	1.21754	0.904239	NA	no	no
CG31933	0	0	1.70566	NA	NA	no	no
CG31937	1304.71	-0.173646	0.0790918	0.0267941	0.0433276	no	no
CG31949	0	0	1.70566	NA	NA	no	no
CG31950	86.4275	1.17249	0.227617	2.66505e-08	8.60866e-08	no	no
CG31957	160.707	1.143	0.198149	8.9341e-10	3.26464e-09	no	no
CG31960	1.79837	0.0885266	0.900843	0.815941	0.85968	no	no
CG31961	485.092	0.890666	0.122465	8.95911e-14	4.23853e-13	no	no
CG31974	29.8256	-0.854405	0.338516	0.00308265	0.00582121	no	no
CG31975	0.234231	-0.182601	1.25089	0.624002	NA	no	no
CG31976	0.072818	-0.0417889	1.21731	0.908135	NA	no	no
CG3198	442.008	-0.981696	0.0974571	1.36385e-24	1.15002e-23	no	no
CG3199	0.13806	0	1.21477	1	NA	no	no
CG31997	13426.8	1.51699	0.107778	2.46797e-46	4.53394e-45	yes	no
CG31999	2604.82	-0.620493	0.122635	2.24409e-07	6.75122e-07	no	no
CG32017	555.556	-1.59143	0.192594	5.66957e-18	3.44818e-17	yes	no
CG32023	0	0	1.70566	NA	NA	no	no
CG32032	364.762	-1.22264	0.139792	1.90117e-19	1.261e-18	no	no
CG32036	4.61372	2.71651	1.39537	0.000972104	0.00197	no	no
CG32037	34.021	-6.26697	0.900911	1.70083e-13	7.91351e-13	yes	yes
CG32039	252.748	-0.0690086	0.151044	0.637355	0.712825	no	no
CG32055	13.9581	-2.48957	1.37212	0.00150903	0.00297027	no	no
[truncated: 4,142 more rows]
