# Supplementary material for: Evolutionary shifts in taste coding in the fruit pest Drosophila suzukii
Source: eLife. 2021 Feb 22;10:e64317. doi: 10.7554/eLife.64317 (PMC7899650; doi:10.7554/eLife.64317)
Supplement: Supplementary file 4. — Log2FCs are described in the 3rd column, adjusted p-values in the 6th column, and whether a gene was considered a hit in all four differential expression (DE) analysis pipelines (yes) or not (no). [file elife-64317-supp4.xlsx]

## Sheet: Dsuz vs Dbia DESeq2
gene	baseMean	log2FoldChange	lfcSE	pvalue	padj	L2CF>=1 with all pipelines	L2CF>=2 with all pipelines
2020-09-01	639.895	-0.0367392	0.0931815	0.690797	0.744684	no	no
2020-09-05	40.949	-2.12581	0.335041	1.25515e-11	4.63294e-11	yes	yes
140up	250.969	-0.60343	0.171417	0.000275159	0.000547434	no	no
26-29-p	11284.5	0.442919	0.0577308	1.36186e-14	6.10871e-14	no	no
7B2	398.586	0.64984	0.130066	3.50834e-07	9.29095e-07	no	no
a10	3.0453	0.528049	1.46269	0.211327	0.267656	no	no
a5	0.348142	0.0378945	1.21977	0.917083	NA	no	no
AANATL2	10.1959	-0.47219	0.572911	0.265972	0.329143	no	no
Aatf	438.233	-1.97207	0.125875	2.24544e-56	5.11661e-55	yes	no
Aats-ala	2346.21	0.506743	0.0759241	1.85629e-11	6.75938e-11	no	no
Aats-ala-m	842.168	-0.734754	0.0920733	7.58535e-16	3.62781e-15	no	no
Aats-arg	1318.63	-0.680787	0.087533	4.25144e-15	1.95666e-14	no	no
Aats-asn	1624.12	0.223457	0.0774504	0.00369491	0.00641077	no	no
Aats-asp	1746.73	0.776377	0.094171	7.9117e-17	3.96901e-16	no	no
Aats-gln	1098.97	0.18469	0.0980233	0.0570612	0.0818101	no	no
Aats-gly	1474.43	-0.634556	0.0994432	1.09073e-10	3.75819e-10	no	no
Aats-his	1736	1.04439	0.0754176	3.23547e-44	5.05739e-43	no	no
Aats-leu	473.007	-0.962554	0.126542	8.62245e-15	3.90869e-14	no	no
Aats-lys	1388.54	0.547743	0.0819022	1.60537e-11	5.87071e-11	no	no
Aats-pro	153.438	-1.66751	0.185938	2.80312e-20	1.68681e-19	yes	no
Aats-tyr	1226.19	-0.0727416	0.0871074	0.400035	0.46987	no	no
Aats-tyr-m	282.113	-1.68328	0.145899	8.07429e-32	8.51787e-31	yes	no
Aats-val	2880.22	0.384019	0.0934255	3.34188e-05	7.34098e-05	no	no
abo	410.366	-0.00811443	0.113751	0.942379	0.962658	no	no
ac	0	0	1.62753	NA	NA	no	no
Ac13E	3541.11	0.428667	0.0788225	4.37678e-08	1.23908e-07	no	no
Ac3	143.098	-0.317055	0.196322	0.0927214	0.127312	no	no
Acam	0.0939444	0.0378927	1.21977	0.917087	NA	no	no
ACC	11601.7	0.551724	0.0755958	2.05534e-13	8.50503e-13	no	no
Ace	1450.76	2.26194	0.111907	4.66244e-92	2.39044e-90	yes	no
Acer	2871.59	-1.71981	0.0802878	8.33659e-103	5.02843e-101	yes	no
achi	212.691	0.0797351	0.168625	0.626437	0.68627	no	no
Ack	1576.56	0.451881	0.0789391	8.25053e-09	2.47371e-08	no	no
Acn	1983.19	-0.136815	0.0862674	0.110031	0.148847	no	no
Acp26Ab	0.401244	0.208777	1.2543	0.578865	NA	no	no
Acp32CD	0	0	1.62753	NA	NA	no	no
Acp53C14b	0	0	1.62753	NA	NA	no	no
Acsl	12284.5	0.31578	0.0673087	2.43045e-06	5.9736e-06	no	no
Act42A	1790.94	-0.0272193	0.074841	0.714534	0.765571	no	no
Act57B	8488.39	3.03047	0.25783	4.70838e-34	5.4739e-33	yes	yes
Act5C	21296.3	0.638115	0.0838781	1.72733e-14	7.71428e-14	no	no
Act79B	25.501	5.45675	1.58317	4.04586e-06	9.73855e-06	yes	yes
Act87E	658.247	3.65904	0.23806	1.27802e-55	2.82431e-54	yes	yes
Act88F	30.4895	-3.49054	0.572973	6.35927e-12	2.39032e-11	yes	yes
Actn	3312.25	1.94839	0.131857	1.84298e-50	3.41118e-49	yes	no
Ada	59.9831	-1.62676	0.294085	2.88929e-09	8.92911e-09	yes	no
Ada2a	95.6799	-0.751642	0.255352	0.00155456	0.0028516	no	no
Adam	1536.43	0.0998326	0.113454	0.372625	0.442541	no	no
adat	53.9938	-0.261726	0.298079	0.336292	0.40502	no	no
ade3	627.83	0.405181	0.139454	0.00301306	0.00528859	no	no
AdenoK	933.105	-0.054027	0.116342	0.637767	0.696746	no	no
Adgf-A	21731.9	-0.422109	0.0941816	6.04501e-06	1.43088e-05	no	no
Adgf-D	129.771	0.0318531	0.182806	0.856942	0.892452	no	no
Adgf-E	0.0939444	0.0378927	1.21977	0.917087	NA	no	no
Adh	6464.86	-0.241171	0.13658	0.07183	0.100759	no	no
Adhr	8.33161	-1.12021	0.911535	0.0399023	0.0586523	no	no
Adk3	263.912	0.403212	0.168179	0.013485	0.0213784	no	no
adp	545.005	0.45194	0.115281	6.97635e-05	0.000147253	no	no
AdSL	538.437	1.2636	0.131851	1.38361e-22	9.38332e-22	no	no
AdSS	10612.6	-0.0638717	0.105112	0.538867	0.605075	no	no
Ady43A	441.426	0.53747	0.136525	5.85244e-05	0.000124679	no	no
aft	544.837	-0.325666	0.138005	0.0160651	0.0251344	no	no
Afti	760.962	0.253532	0.10709	0.0165845	0.0258997	no	no
AGBE	2350.28	-0.378076	0.103164	0.000210137	0.0004225	no	no
agt	163.118	-5.26145	0.326453	8.66837e-60	2.21108e-58	yes	yes
Ahcy13	903.254	0.425351	0.147873	0.0032336	0.00564477	no	no
Ak6	186.221	-0.777275	0.208918	9.19072e-05	0.00019147	no	no
Akh	1.70282	-1.20063	1.31461	0.0435347	0.0635542	no	no
AkhR	275.955	-1.02796	0.198162	5.55782e-08	1.56137e-07	yes	no
akirin	734.486	0.689498	0.143097	8.07569e-07	2.07643e-06	no	no
al	15.1209	-0.164332	0.532694	0.685496	0.740073	no	no
Ald	22329.1	2.43794	0.124774	2.03989e-86	9.01597e-85	yes	yes
Aldh	8028.08	0.369934	0.0577128	1.25402e-10	4.29484e-10	no	no
Alg10	363.59	-0.558657	0.12677	7.24329e-06	1.69443e-05	no	no
alien	1068.66	-0.775343	0.100054	4.40754e-15	2.01943e-14	no	no
ALiX	5515.59	0.468748	0.0826123	1.08784e-08	3.22763e-08	no	no
Alk	148.258	2.25253	0.322741	1.4288e-13	5.95565e-13	yes	yes
AlkB	201.48	-1.11855	0.172138	1.69228e-11	6.17533e-11	yes	no
alph	1432.87	1.2347	0.0903244	2.39177e-43	3.63876e-42	no	no
alpha-Est10	3975.43	0.694752	0.157514	5.67024e-06	1.34652e-05	no	no
alpha-Est3	1711.13	0.278077	0.0852433	0.00101278	0.00189507	no	no
alpha-Est5	137.615	2.11695	0.223302	1.73732e-22	1.17201e-21	yes	no
alpha-Est7	8798.79	0.492348	0.119812	2.98832e-05	6.59257e-05	no	no
alpha-Est8	2002.22	2.47659	0.0905016	2.56296e-166	3.36931e-164	yes	yes
alpha-Est9	480.17	0.360519	0.114636	0.00142793	0.00262966	no	no
alpha4GT1	365.539	-1.024	0.130159	9.49633e-16	4.50812e-15	yes	no
alphaCOP	6026.49	0.406893	0.072556	1.70318e-08	4.98982e-08	no	no
alphaTub67C	67.0443	0.534909	1.14136	0.253717	0.315806	no	no
alphaTub84B	15304.6	1.05753	0.0809983	1.40266e-39	1.95952e-38	no	no
alphaTub84D	1115.22	1.79255	0.0999738	6.53405e-73	2.24833e-71	yes	no
alphaTub85E	52.6028	0.600262	0.285207	0.0216907	0.0331965	no	no
alrm	9.99206	-1.02116	0.593592	0.0220902	0.0337173	no	no
Als2	2738.48	0.144665	0.0970607	0.132351	0.17593	no	no
aly	0	0	1.62753	NA	NA	no	no
amd	2829.3	-1.49982	0.102682	2.6627e-49	4.74016e-48	yes	no
amos	0	0	1.62753	NA	NA	no	no
Amph	9629	-0.6386	0.0640714	1.31884e-23	9.44368e-23	no	no
Amun	2358.97	0.720237	0.0759465	1.31641e-21	8.47891e-21	no	no
amx	272.334	1.35503	0.145171	1.27583e-21	8.22792e-21	yes	no
Amy-p	146.38	5.97518	0.472624	5.62788e-38	7.55344e-37	yes	yes
Amyrel	1.37609	0.226311	1.01576	0.600934	0.662293	no	no
ana1	435.483	-0.549317	0.137047	4.2665e-05	9.23747e-05	no	no
ana2	60.1433	-0.418337	0.317017	0.143232	0.18912	no	no
ana3	107.959	-0.405179	0.293537	0.131175	0.174504	no	no
Andorra	0.0939444	0.0378927	1.21977	0.917087	NA	no	no
angel	163.564	0.412927	0.169086	0.0118147	0.0188998	no	no
antdh	5004.06	7.42785	0.185472	0	0	yes	yes
AnxB10	3473.6	0.996021	0.0842627	8.61048e-33	9.61785e-32	no	no
AnxB9	9412.01	1.16233	0.0917369	1.58727e-37	2.07072e-36	no	no
aop	672.428	0.760272	0.134832	8.36746e-09	2.50584e-08	no	no
Aos1	451.699	-1.18549	0.105824	6.90207e-30	6.65167e-29	yes	no
AP-1-2beta	3427.37	0.564835	0.072342	4.0332e-15	1.85955e-14	no	no
AP-1gamma	3156.53	0.583377	0.073996	2.14163e-15	1.00184e-14	no	no
AP-1mu	1024.96	-5.72561	0.690178	4.02236e-18	2.1617e-17	yes	yes
AP-2alpha	2246.6	-0.104942	0.0667596	0.114314	0.15403	no	no
AP-2mu	1499.98	0.0458108	0.0844674	0.584859	0.6475	no	no
AP-2sigma	754.232	-1.32804	0.103662	1.83717e-38	2.5051e-37	yes	no
APC4	248.591	0.238183	0.141608	0.0859375	0.119046	no	no
aph-1	350.112	-0.325202	0.12478	0.00806941	0.013273	no	no
Aph-4	511.603	0.147409	0.197366	0.437032	0.506474	no	no
Aplip1	180.484	0.36482	0.167381	0.0247712	0.0375634	no	no
APP-BP1	373.369	-0.789879	0.123633	7.68993e-11	2.68024e-10	no	no
Aprt	225.76	-0.366031	0.149733	0.0123086	0.0196287	no	no
Aps	740.814	0.147358	0.0996783	0.135319	0.17955	no	no
apt	154.515	-0.209133	0.174371	0.215912	0.272924	no	no
AQP	125.701	2.18099	0.33622	4.59609e-12	1.75068e-11	yes	yes
aqrs	0.179496	0.0378934	1.21977	0.917086	NA	no	no
aralar1	2231.2	0.0337581	0.0848409	0.688551	0.742575	no	no
Arc1	16190.2	2.54253	0.0981964	2.37817e-149	2.59423e-147	yes	yes
Arc2	248.754	0.920884	0.15984	2.8291e-09	8.74836e-09	no	no
Arc42	1189.43	-0.451599	0.08527	9.39598e-08	2.59554e-07	no	no
Arf102F	3101.32	-0.948527	0.0998309	6.58478e-22	4.31715e-21	no	no
Arf51F	1057.51	-0.698644	0.127953	2.62191e-08	7.53505e-08	no	no
Arf79F	7175.94	0.0082401	0.0851624	0.92235	0.945776	no	no
ArfGAP1	1226.84	0.29628	0.0755097	7.9071e-05	0.000165907	no	no
ArfGAP3	1819.44	0.516401	0.0843045	6.66924e-10	2.16824e-09	no	no
Arfip	427.272	-0.104841	0.109746	0.333484	0.4023	no	no
Arfrp1	175.692	0.172245	0.16179	0.274139	0.337781	no	no
ari-2	432.952	-0.0113573	0.146314	0.936769	0.957881	no	no
Arl2	215.111	0.15358	0.144823	0.278591	0.342527	no	no
Arl6	99.1774	-1.58588	0.226855	2.63081e-13	1.07992e-12	yes	no
armi	209.465	0.739589	0.224994	0.000501274	0.000969093	no	no
Arp1	2543.55	-0.115878	0.0645523	0.0714256	0.100246	no	no
Arp3	1132.52	-0.103946	0.0800378	0.191135	0.244498	no	no
Arp5	278.103	0.0732857	0.137127	0.585912	0.648386	no	no
Arp53D	0.129688	0.0378927	1.21977	0.917087	NA	no	no
Arp6	359.868	0.384222	0.161933	0.0147047	0.0232044	no	no
Arp8	210.342	0.191384	0.14437	0.175625	0.226979	no	no
Arpc2	1371.47	-1.04943	0.100507	3.92683e-26	3.16554e-25	yes	no
Arpc3A	264.477	0.334893	0.149396	0.0217437	0.0332677	no	no
Arpc3B	23.1628	-0.776525	0.561771	0.068393	0.0964122	no	no
Arpc4	1444.14	-0.930327	0.101048	1.1184e-20	6.86713e-20	no	no
Arpc5	281.794	0.0765944	0.139758	0.576118	0.639064	no	no
Arr1	11.3342	0.568793	0.795553	0.236642	0.29686	no	no
Arr2	15.317	1.95746	1.80969	0.00999683	0.0161735	no	no
Ars2	3289.64	-0.485718	0.117167	2.57509e-05	5.74022e-05	no	no
Art1	581.179	0.0724546	0.115052	0.523277	0.589376	no	no
Art2	1.75654	0.674954	1.04198	0.177684	0.229236	no	no
Art4	97.9235	0.695768	0.278581	0.00658543	0.0109764	no	no
Art7	309.227	0.380232	0.13596	0.0043439	0.00745604	no	no
Art8	100.952	-2.89274	0.263409	4.64428e-30	4.50117e-29	yes	yes
aru	2668.5	1.19262	0.0935138	5.09414e-38	6.88228e-37	no	no
arx	62.2214	-0.159126	0.288895	0.548796	0.614608	no	no
Asap	1516.98	-0.101718	0.0725817	0.158839	0.207483	no	no
asf1	296.671	-0.0985708	0.149085	0.498834	0.565198	no	no
asl	154.74	-0.107744	0.19659	0.56862	0.631841	no	no
asp	42.8842	-0.126785	0.916802	0.773831	0.820905	no	no
asparagine-synthetase	529.751	0.926027	0.36081	0.00336368	0.00586585	no	no
asrij	496.665	0.473063	0.124738	0.00011472	0.000236689	no	no
AstA	0.828659	0.206901	1.07071	0.62171	0.68182	no	no
AstA-R1	13.4906	-1.94006	0.633565	0.000110067	0.000227455	yes	no
AstC	0	0	1.62753	NA	NA	no	no
AstC-R1	18.6604	-2.08655	0.516555	2.41701e-06	5.94342e-06	yes	yes
AstCC	0	0	1.62753	NA	NA	no	no
Asx	1276.16	-0.436493	0.0956887	4.08725e-06	9.83358e-06	no	no
Atac1	89.7384	-1.80425	0.255837	1.45035e-13	6.03077e-13	yes	no
Atac2	193.781	-0.30847	0.154929	0.0411908	0.0604077	no	no
ATbp	82.4534	0.323778	0.227113	0.132526	0.176117	no	no
Atet	2052.88	1.5104	0.0806327	2.8184e-79	1.07037e-77	yes	no
Atf-2	98.3603	0.300576	0.230478	0.168217	0.218121	no	no
Atg12	120.979	-1.38569	0.234936	4.50153e-10	1.4785e-09	yes	no
Atg16	401.177	-0.89379	0.109445	1.15435e-16	5.75717e-16	no	no
Atg17	2579.72	0.238945	0.0928188	0.0093939	0.0153043	no	no
Atg2	3253.42	-0.183741	0.0697829	0.00813901	0.0133789	no	no
Atg3	724.148	0.736799	0.0868171	1.09856e-17	5.79457e-17	no	no
Atg4b	371.807	-0.306202	0.114856	0.00687121	0.0114157	no	no
Atg5	264.271	0.39801	0.136132	0.0028636	0.00504698	no	no
Atg6	622.087	0.0622601	0.0938352	0.50319	0.569756	no	no
Atg8a	8709.73	0.132333	0.0796638	0.0945332	0.129557	no	no
Atg8b	17.0856	1.09873	0.494307	0.00594735	0.0100007	no	no
Atg9	1220.48	0.369933	0.116354	0.00125825	0.00233058	no	no
atilla	16734.5	-0.89072	0.0769297	1.95058e-31	2.02442e-30	no	no
atk	5.26104	-0.356701	0.681086	0.429614	0.499689	no	no
atl	7379.49	1.08213	0.0779187	1.68167e-44	2.66109e-43	no	no
atms	639.57	0.438974	0.0992744	7.85399e-06	1.82702e-05	no	no
ato	0	0	1.62753	NA	NA	no	no
Atox1	486.572	-0.18577	0.111753	0.09222	0.126793	no	no
ATP7	1752.48	-0.430277	0.0881651	8.59201e-07	2.20366e-06	no	no
ATPCL	10064.5	0.589858	0.0637443	1.45489e-20	8.86949e-20	no	no
ATPsyn-beta	54666.5	-0.25966	0.0618418	2.49234e-05	5.56786e-05	no	no
ATPsyn-Cf6	2840.34	-0.00523162	0.123323	0.965635	0.98252	no	no
ATPsyn-d	5470.81	-0.0928897	0.0697077	0.180513	0.232593	no	no
AttC	302.613	1.10629	0.84711	0.0373524	0.0552049	no	no
Atxn7	470.252	0.709375	0.117199	7.71429e-10	2.49851e-09	no	no
aurB	138.798	-3.80228	0.341156	4.56361e-31	4.61491e-30	yes	yes
aux	2850.1	0.0514982	0.0726897	0.476287	0.544465	no	no
ave	98.6257	0.230053	0.242789	0.314102	0.381884	no	no
Aven	126.039	0.0924436	0.185543	0.605841	0.666842	no	no
Axs	862.594	-0.0832532	0.098628	0.393924	0.463753	no	no
Axud1	679.2	0.641544	0.11049	3.90471e-09	1.1888e-08	no	no
az2	186.551	0.393043	0.161037	0.0121129	0.0193347	no	no
b	1355.35	0.251859	0.152843	0.0913774	0.125668	no	no
b6	1.23212	0.575323	1.13811	0.228026	0.287104	no	no
babos	349.121	0.520746	0.12648	2.78476e-05	6.17537e-05	no	no
Bace	12.5597	0.0400891	1.00544	0.924027	0.946362	no	no
baf	424.32	0.244239	0.138543	0.0721316	0.101154	no	no
ball	169.752	0.0755364	0.180083	0.664627	0.720411	no	no
bam	8.98417	1.42546	0.989545	0.0153005	0.0240335	no	no
Bap170	764.904	0.0970174	0.101469	0.333933	0.402557	no	no
bbc	1364.48	-0.175353	0.114849	0.121713	0.162802	no	no
BBS8	119.838	0.542553	0.206962	0.00602042	0.0101103	no	no
bc10	148.494	0.57412	0.203895	0.00320635	0.00560292	no	no
BCAS2	227.396	-0.461422	0.133333	0.000418834	0.000818667	no	no
BCL7-like	43.9996	0.99884	0.347974	0.00114997	0.00213851	no	no
bcn92	99.8776	-0.635659	0.224745	0.00278432	0.00491401	no	no
Bdbt	209.578	-1.14612	0.173533	7.75568e-12	2.89398e-11	yes	no
bdg	1452.01	0.0454568	0.084348	0.587243	0.64918	no	no
BEAF-32	343.693	0.180135	0.131114	0.16201	0.211061	no	no
beg	314.458	0.0341034	0.132606	0.79346	0.836879	no	no
Bem46	297.787	0.365518	0.142091	0.00859068	0.0140807	no	no
ben	1405.3	0.314554	0.0763206	3.37226e-05	7.40135e-05	no	no
Bet1	553.105	1.02183	0.103358	1.25546e-23	9.00244e-23	no	no
beta_COP	4341.8	0.771593	0.074416	1.66248e-25	1.30131e-24	no	no
beta4GalNAcTB	272.493	1.24652	0.153033	5.81757e-17	2.96193e-16	no	no
beta4GalT7	219.91	0.10857	0.139879	0.428461	0.498575	no	no
betaCOP	6259.91	0.702752	0.0652356	2.57226e-27	2.20904e-26	no	no
betaggt-I	391.932	0.460349	0.113636	3.98756e-05	8.68857e-05	no	no
betaggt-II	344.631	0.383896	0.130324	0.00270563	0.00478832	no	no
betaTub56D	13352.5	0.989298	0.0658569	1.50949e-51	2.877e-50	no	no
betaTub60D	122.128	1.29653	0.233037	3.7883e-09	1.15542e-08	yes	no
betaTub97EF	1015.72	0.667471	0.0929326	4.02839e-13	1.63398e-12	no	no
BG642167	0.251214	0	1.21818	1	NA	no	no
BHD	171.499	-0.411961	0.157224	0.00714067	0.0118365	no	no
BI-1	3658.34	0.589826	0.1034	7.76139e-09	2.33251e-08	no	no
bic	6092.63	-0.187539	0.0602855	0.00179323	0.00326139	no	no
BicC	182.8	0.373161	0.959978	0.417116	0.48692	no	no
BigH1	39.3314	0.00445589	0.971351	0.991679	1	no	no
Bin1	192.888	-0.492279	0.144174	0.000478143	0.00092647	no	no
bin3	1321.86	0.0829195	0.0920988	0.3638	0.433264	no	no
bip1	139.789	0.478814	0.174475	0.00456691	0.0078231	no	no
Bka	133.602	-0.441469	0.176454	0.00968933	0.0157206	no	no
Blos1	120.243	-1.35348	0.242939	3.27726e-09	1.00856e-08	yes	no
Blos2	233.511	0.0689855	0.162839	0.663391	0.719223	no	no
Blos4	138.189	-1.89985	0.208913	7.93772e-21	4.93892e-20	yes	no
blot	2879.74	0.107522	0.0783995	0.167557	0.21743	no	no
blp	214.564	-0.513386	0.149799	0.000444054	0.00086401	no	no
blue	1076.74	0.127268	0.0832121	0.123488	0.164918	no	no
blw	30087.2	0.486274	0.10867	5.81758e-06	1.37959e-05	no	no
BM-40-SPARC	1180.88	-0.445443	0.0871594	2.56527e-07	6.86438e-07	no	no
bnk	0	0	1.62753	NA	NA	no	no
BobA	0.171371	-0.135045	1.23824	0.713394	NA	no	no
boi	83.1157	0.903073	0.292416	0.000699173	0.00132913	no	no
bond	298.193	1.12163	0.182826	1.76234e-10	5.97982e-10	no	no
bonsai	447.847	-1.36254	0.119896	7.72596e-31	7.73653e-30	yes	no
bora	8.98086	-0.401723	0.851072	0.391998	0.461805	no	no
bou	740.119	1.28674	0.153318	6.74651e-18	3.58439e-17	yes	no
bowl	1522.33	0.949767	0.0858958	6.41182e-29	5.92314e-28	no	no
Brd	0.358059	0	1.21818	1	NA	no	no
brk	300.443	0.820003	0.160526	1.39097e-07	3.80904e-07	no	no
Brms1	292.758	1.54957	0.139446	1.09668e-29	1.04511e-28	yes	no
brn	95.5248	1.11263	0.264104	5.43135e-06	1.29278e-05	no	no
Bro	0.129688	0.0378927	1.21977	0.917087	NA	no	no
bru	1267.8	-0.121962	0.0729303	0.092682	0.127292	no	no
brv1	0.0716119	0	1.21818	1	NA	no	no
BRWD3	2159.27	0.498905	0.0673564	9.76528e-14	4.13432e-13	no	no
bsf	2700.63	-2.00541	0.0888	5.61608e-114	3.94434e-112	yes	yes
Bsg25A	0	0	1.62753	NA	NA	no	no
Bsg25D	1210.71	0.65537	0.0917803	5.57593e-13	2.23517e-12	no	no
bsh	0.0716119	0	1.21818	1	NA	no	no
Btd	4.4046	-1.83356	1.21865	0.00635901	0.0106301	no	no
Bteb2	0	0	1.62753	NA	NA	no	no
btn	1.1344	-1.08268	1.45747	0.0595048	0.0849334	no	no
btv	697.25	0.676162	0.105461	8.31734e-11	2.89301e-10	no	no
Bub3	403.518	-0.142876	0.108729	0.183499	0.236085	no	no
Buffy	1885.08	0.132404	0.083904	0.11196	0.151296	no	no
Bug22	275.655	-1.45186	0.140288	4.62009e-26	3.71856e-25	yes	no
bur	1295.11	-0.136254	0.0705224	0.0521474	0.075166	no	no
Burs	0	0	1.62753	NA	NA	no	no
bw	1.33195	-0.986208	1.27612	0.0754238	0.105454	no	no
Bx42	1136.11	0.409962	0.11032	0.000166646	0.000337973	no	no
by	3507.73	0.729905	0.0570688	9.83284e-38	1.29596e-36	no	no
bys	422.86	0.177743	0.123393	0.143423	0.189323	no	no
Bzd	332.023	0.722722	0.115906	2.38091e-10	7.99404e-10	no	no
c-cup	0	0	1.62753	NA	NA	no	no
c11.1	3462.94	1.3643	0.0899574	7.22304e-53	1.42983e-51	yes	no
c12.1	526.342	0.763931	0.131987	3.45553e-09	1.05897e-08	no	no
C1GalTA	469.537	-0.00697237	0.128597	0.956028	0.974077	no	no
Ca-P60A	38783.6	1.47513	0.124409	2.1077e-33	2.40673e-32	yes	no
CaBP1	4566.02	2.09322	0.152891	8.88874e-44	1.37267e-42	yes	no
cactin	670.715	0.991465	0.115578	2.73999e-18	1.49257e-17	no	no
cad	13.0042	-0.0385057	1.01512	0.926631	0.94846	no	no
CadN2	6.50784	-1.26347	0.835696	0.0193399	0.0298752	no	no
Caf1-180	299.236	0.854329	0.227333	6.69512e-05	0.00014155	no	no
cag	164.137	-1.06226	0.159365	6.28601e-12	2.36625e-11	yes	no
CAH1	13487.4	0.648315	0.132523	5.99843e-07	1.5627e-06	no	no
CalpA	4640.92	-0.31165	0.0676127	3.63025e-06	8.77112e-06	no	no
CalpB	2575.2	0.108824	0.0824543	0.18385	0.236477	no	no
CalpC	186.785	-1.91009	0.267494	7.09915e-14	3.03817e-13	yes	no
Cals	10043.2	-1.60451	0.280008	9.36742e-10	3.00731e-09	yes	no
calypso	167.114	0.148041	0.167059	0.361862	0.431558	no	no
CanB	100.131	0.0230591	0.225493	0.914249	0.93841	no	no
CanB2	906.943	-1.15783	0.0851582	7.81224e-43	1.16774e-41	yes	no
Cand1	2534.5	-0.21376	0.0798016	0.00701145	0.0116373	no	no
Caper	2237.05	0.607849	0.0789003	8.57018e-15	3.88843e-14	no	no
Capr	1998.83	0.0626023	0.0731535	0.389545	0.459654	no	no
capt	3641.17	0.603267	0.0809186	5.87003e-14	2.52692e-13	no	no
car	364.824	0.837435	0.149346	8.47526e-09	2.53664e-08	no	no
Cas	1169.24	-0.556142	0.113897	7.27026e-07	1.87592e-06	no	no
casp	1481.17	-0.226899	0.0769254	0.0030004	0.00526997	no	no
Cat	17801.9	1.11599	0.0678413	1.72115e-61	4.66895e-60	no	no
cathD	16687.7	-0.19188	0.0689175	0.00514449	0.0087366	no	no
cato	0	0	1.62753	NA	NA	no	no
Catsup	2437.4	-0.222583	0.0894019	0.012062	0.0192653	no	no
cbc	355.644	-0.42751	0.118817	0.000259138	0.000516563	no	no
Cbp53E	186.18	-1.97016	0.177093	7.90215e-30	7.57277e-29	yes	no
Cbp80	1170.4	0.153911	0.0807272	0.0549429	0.0789497	no	no
Cbs	793.72	1.80245	0.118691	4.10882e-53	8.26114e-52	yes	no
Cby	19.2465	-0.058127	0.382065	0.860254	0.894629	no	no
CCAP	0.166762	0.0378934	1.21977	0.917086	NA	no	no
CCHa1	12.1765	0.631335	0.585073	0.14422	0.190326	no	no
CCHa2	43.7951	3.69198	0.705439	1.00534e-09	3.21949e-09	yes	yes
Cchl	1541.07	0.530135	0.109751	9.82209e-07	2.49418e-06	no	no
Ccm3	1094.34	-0.64428	0.0889516	2.68463e-13	1.09937e-12	no	no
Ccs	381.441	0.892983	0.156547	4.23561e-09	1.28573e-08	no	no
Cct5	2248.91	0.121208	0.0736747	0.0980598	0.13396	no	no
Ccz1	420.632	-0.760414	0.129922	2.36162e-09	7.35605e-09	no	no
Cda9	0.815866	-0.243696	1.07667	0.564825	0.628714	no	no
cdc14	1537.88	-0.192364	0.0891773	0.0296437	0.0444785	no	no
Cdc16	173.335	-0.439547	0.162351	0.00535234	0.00906257	no	no
Cdc23	146.702	-0.537574	0.178154	0.00178263	0.00324327	no	no
cdc2rk	149.47	-1.13976	0.196628	1.34606e-09	4.25216e-09	yes	no
Cdc42	1347.91	0.331588	0.0815879	4.26254e-05	9.23473e-05	no	no
CDC45L	189.718	0.77425	0.212052	0.000121259	0.000249276	no	no
Cdc5	519.509	0.221802	0.106877	0.0357365	0.0529694	no	no
CdGAPr	1440.5	0.631685	0.0762933	7.73356e-17	3.88725e-16	no	no
Cdk1	132.288	-3.59247	1.03013	3.25971e-06	7.90565e-06	yes	yes
Cdk12	1803.39	-0.0237332	0.0666314	0.720494	0.77076	no	no
Cdk4	416.387	-0.0330447	0.118544	0.777355	0.82345	no	no
Cdk5alpha	440.981	-0.850656	0.1033	7.25555e-17	3.66495e-16	no	no
CdsA	1710.46	-0.413685	0.0796607	1.70809e-07	4.64583e-07	no	no
CecB	1.95994	0.993496	1.33064	0.0740775	0.103713	no	no
CecC	31.1957	0.045678	0.419041	0.896755	0.924057	no	no
Ced-12	770.24	-1.31495	0.0806527	1.22083e-60	3.2264e-59	yes	no
ced-6	14538.2	-1.08448	0.062372	2.29257e-68	7.43926e-67	yes	no
Cen	1391.28	-0.994046	0.096016	1.14761e-25	9.15055e-25	no	no
CenB1A	2359.92	-0.723013	0.0753578	4.49382e-22	2.96905e-21	no	no
Cep89	0.864291	0.391665	1.0475	0.386517	0.456502	no	no
cer	620.567	0.331384	0.15399	0.0273699	0.0413086	no	no
cert	1129.27	0.945	0.085525	7.07919e-29	6.50448e-28	no	no
CG10005	1.56538	-0.424648	0.896477	0.366913	0.436769	no	no
CG10014	0.358991	0.11776	1.22943	0.748907	NA	no	no
CG10026	504.663	-2.164	0.138916	7.36507e-56	1.64894e-54	yes	yes
CG10029	0.14443	0	1.21818	1	NA	no	no
CG10031	464.165	5.12335	0.312145	6.61423e-62	1.843e-60	yes	yes
CG10035	9.94779	1.02602	0.834723	0.0496254	0.0716702	no	no
CG10050	36.2259	0.601654	0.337648	0.0448338	0.0652648	no	no
CG10051	5.24761	-1.02669	1.03042	0.0622794	0.088475	no	no
CG10053	143.521	-0.55153	0.221323	0.00858494	0.0140803	no	no
CG10063	5.11022	-1.07435	0.755186	0.0338175	0.0503141	no	no
CG10068	686.288	-1.35476	0.0937581	3.12248e-48	5.40843e-47	yes	no
CG10075	398.029	-0.303575	0.119725	0.0100556	0.0162584	no	no
CG10077	7584.93	0.343704	0.0850539	4.66127e-05	0.000100401	no	no
CG10098	526.159	0.179388	0.0976517	0.0635818	0.0900757	no	no
CG10104	0	0	1.62753	NA	NA	no	no
CG10116	1.25975	0	1.01818	1	1	no	no
CG10126	1403.6	-0.347911	0.164304	0.0293716	0.044109	no	no
CG10131	22.7135	0.828867	0.689241	0.0804771	0.111787	no	no
CG10133	128.533	-0.209591	0.190565	0.253587	0.315799	no	no
CG10139	251.236	-0.0227486	0.157629	0.882334	0.911674	no	no
CG10147	148.503	0.232338	0.191401	0.207454	0.263011	no	no
CG10163	0.83124	0.0561796	1.09797	0.887932	0.916535	no	no
CG10164	0.0939444	0.0378927	1.21977	0.917087	NA	no	no
CG10171	185.959	2.09614	0.234521	2.73178e-20	1.64581e-19	yes	no
CG10176	2557.5	-1.1509	0.100544	4.618e-31	4.66073e-30	yes	no
CG10177	0.072818	0	1.21818	1	NA	no	no
CG10178	191.17	-0.844557	0.161462	6.83943e-08	1.91198e-07	no	no
CG10184	79.512	1.43068	0.28327	5.09511e-08	1.43926e-07	yes	no
CG10188	795.27	0.285807	0.102823	0.00494757	0.00843571	no	no
CG10189	152.014	-1.15418	0.199713	1.44396e-09	4.55579e-09	yes	no
CG10195	255.769	-0.215534	0.149244	0.139487	0.18446	no	no
CG10202	1.54542	1.08916	1.35475	0.0583924	0.0836018	no	no
CG10205	14115.3	-2.69124	0.114188	1.44541e-124	1.17629e-122	yes	yes
CG10208	128.627	1.7597	0.230602	2.01383e-15	9.43777e-15	yes	no
CG10211	14470.2	-2.42818	0.144623	1.17278e-64	3.49585e-63	yes	yes
CG10214	106.63	-0.343859	0.229362	0.113248	0.152675	no	no
CG10217	3302.66	-0.507085	0.0685336	1.02592e-13	4.32914e-13	no	no
CG10219	1896.74	-0.357955	0.101738	0.000374921	0.000735637	no	no
CG10253	107.337	0.73973	0.221042	0.000405667	0.000794445	no	no
CG10257	122.829	-0.536185	0.200403	0.0051874	0.00880363	no	no
CG10262	176.512	0.692138	0.170279	2.64884e-05	5.89436e-05	no	no
CG10264	0.23958	0.037894	1.21977	0.917084	NA	no	no
CG10265	63.8038	-1.81957	0.279484	5.96719e-12	2.25452e-11	yes	no
CG10286	646.711	-0.741193	0.108505	4.30665e-12	1.64287e-11	no	no
CG10289	1959.96	-0.483245	0.0851867	1.07787e-08	3.2036e-08	no	no
CG10306	1944.58	-0.277935	0.0778674	0.000328187	0.000647908	no	no
CG10307	188.598	2.35718	0.244018	1.97427e-23	1.39808e-22	yes	yes
CG10311	462.464	0.17073	0.150358	0.245187	0.306729	no	no
CG10320	909.202	0.512509	0.134798	0.000105048	0.000217433	no	no
CG10324	235.22	0.467184	0.15723	0.00227484	0.00406663	no	no
CG10326	460.169	-0.625816	0.114944	3.2555e-08	9.29859e-08	no	no
CG10333	835.782	-0.639025	0.143782	5.36364e-06	1.27785e-05	no	no
CG10336	31.4017	-0.0612673	0.420746	0.862198	0.896105	no	no
CG10337	266.224	1.5083	0.187101	7.80403e-17	3.91883e-16	yes	no
CG10339	1225.9	-0.778282	0.120207	4.48983e-11	1.59524e-10	no	no
CG10343	238.897	-0.522269	0.164437	0.00106975	0.00199586	no	no
CG10344	111.501	-0.639138	0.217551	0.00196087	0.00354492	no	no
CG10348	98.1911	1.46239	0.386354	1.7234e-05	3.9045e-05	no	no
CG10352	21.0109	-2.37103	1.40734	0.00204653	0.00368806	no	no
CG10353	2181	-0.423017	0.0625407	1.10263e-11	4.08465e-11	no	no
CG10362	166.717	1.2288	0.193982	3.86103e-11	1.3766e-10	no	no
CG10365	607.73	-1.51275	0.130076	3.00126e-32	3.25316e-31	yes	no
CG10366	294.953	-0.222863	0.131005	0.083348	0.115681	no	no
CG10375	428.027	-0.238339	0.111701	0.0306606	0.0459238	no	no
CG10376	514.297	-0.104367	0.115539	0.359828	0.429632	no	no
CG10383	806.117	-0.0390848	0.118082	0.737077	0.787126	no	no
CG10396	2.73528	-1.37509	1.37948	0.0285726	0.0429846	no	no
CG10399	94.0383	-1.59221	0.221955	7.00184e-14	2.99903e-13	yes	no
CG10407	23.3235	-1.1729	0.524905	0.00496618	0.00846181	yes	no
CG1041	2035.84	-0.698809	0.0858938	2.2778e-16	1.11712e-15	no	no
CG10413	3719.27	-2.70849	0.0790625	5.62915e-259	2.22005e-256	yes	yes
CG10418	71.9777	-1.67179	0.290867	7.92763e-10	2.56112e-09	yes	no
CG10425	547.64	1.31054	0.103036	6.1758e-38	8.26719e-37	yes	no
CG10426	184.394	-0.648007	0.156958	2.18021e-05	4.89617e-05	no	no
CG10428	120.448	-0.850765	0.210804	2.15175e-05	4.83861e-05	no	no
CG10431	119.26	-1.2171	0.190202	2.59956e-11	9.37928e-11	yes	no
CG10435	499.722	0.357997	0.100765	0.000329172	0.000649602	no	no
CG10444	524.911	0.444177	0.121137	0.000195117	0.000393535	no	no
CG10463	132.582	-1.0149	0.21206	4.58638e-07	1.20525e-06	yes	no
CG10465	1478.19	0.106193	0.144392	0.452497	0.520869	no	no
CG10466	106.916	-0.98029	0.209615	8.54223e-07	2.19199e-06	no	no
CG10470	604.381	-0.637774	0.177231	0.000193053	0.000389525	no	no
CG10479	258.994	-3.79331	0.199613	9.85287e-83	4.07384e-81	yes	yes
CG10505	110.973	-4.46129	0.288046	9.41964e-56	2.09976e-54	yes	yes
CG10508	488.309	-1.75331	0.174153	6.98048e-25	5.31782e-24	yes	no
CG10510	0.775404	0.0656861	1.04822	0.873141	0.904559	no	no
CG10527	7543.86	0.744867	0.0747491	1.1071e-23	7.99451e-23	no	no
CG10561	405.062	0.527988	0.121028	9.26449e-06	2.14153e-05	no	no
CG10565	1533.78	-0.462153	0.0809997	9.11164e-09	2.72393e-08	no	no
CG10566	94.8984	-0.685234	0.205597	0.000473622	0.000918752	no	no
CG10570	4141.78	0.206134	0.136261	0.123076	0.16454	no	no
CG10576	2567.44	0.0359373	0.0627035	0.565002	0.628775	no	no
CG10581	33.5303	-0.256629	0.331112	0.386312	0.456364	no	no
CG10584	172.849	-0.321119	0.173043	0.0555245	0.0797407	no	no
CG10589	0	0	1.62753	NA	NA	no	no
CG10590	1875.35	0.244882	0.089984	0.0060636	0.0101761	no	no
CG10591	1.76788	-1.86965	1.75216	0.0115096	0.0184464	no	no
CG10592	57.521	-7.08397	1.57261	1.22156e-07	3.35275e-07	yes	yes
CG10616	999.405	-0.650634	0.0907507	4.55664e-13	1.84097e-12	no	no
CG10621	180.8	1.42149	0.200036	1.37127e-13	5.72049e-13	yes	no
CG10623	608.655	-1.11124	0.111985	6.90903e-24	5.03162e-23	yes	no
CG10628	188.88	-0.561425	0.159799	0.000301435	0.000597394	no	no
CG10635	319.492	-1.0367	0.169899	2.66925e-10	8.93291e-10	yes	no
CG10639	607.252	0.834898	0.110083	1.39678e-14	6.25988e-14	no	no
CG10654	16.5822	0.769201	0.621663	0.0871315	0.120475	no	no
CG10659	0	0	1.62753	NA	NA	no	no
CG10660	307.68	0.167048	0.132102	0.197968	0.252106	no	no
CG10671	1501.68	0.280239	0.0814921	0.000534698	0.00102944	no	no
CG10674	619.547	-1.32202	0.134372	1.01431e-23	7.34516e-23	yes	no
CG10694	0	0	1.62753	NA	NA	no	no
CG10702	146.951	0.337976	0.187599	0.0615894	0.0875676	no	no
CG10710	66.9972	0.891008	0.407744	0.0100707	0.0162776	no	no
CG10713	14.7579	0.372033	0.45222	0.314885	0.382653	no	no
CG10725	0.978748	0.61406	1.28441	0.193657	0.247354	no	no
CG10731	150.508	-0.484418	0.174126	0.00404292	0.0069721	no	no
CG10738	17.0024	-0.264758	0.476199	0.488112	0.555752	no	no
CG1074	288.874	0.119877	0.129608	0.346741	0.415651	no	no
CG10747	899.898	-0.7468	0.102296	1.44998e-13	6.03077e-13	no	no
CG10748	0	0	1.62753	NA	NA	no	no
CG10749	0.171371	-0.135045	1.23824	0.713394	NA	no	no
CG10750	0.0939444	0.0378927	1.21977	0.917087	NA	no	no
CG10754	517.224	-0.511083	0.0941039	4.15021e-08	1.17689e-07	no	no
CG10761	0.166762	0.0378934	1.21977	0.917086	NA	no	no
CG1077	4.68665	0.515953	1.06826	0.274291	0.337888	no	no
CG10777	1206.16	1.30369	0.137251	2.90731e-22	1.94086e-21	yes	no
CG10778	309.884	1.26431	0.133717	4.76006e-22	3.1409e-21	no	no
CG10799	217.797	4.14269	0.247543	9.1817e-65	2.7529e-63	yes	yes
CG10802	473.939	1.43848	0.131028	5.38836e-29	4.99568e-28	yes	no
CG10809	150.579	0.542837	0.173054	0.0011882	0.00220642	no	no
CG10814	29.2039	4.66201	1.07307	1.16791e-07	3.20722e-07	yes	yes
CG10822	0	0	1.62753	NA	NA	no	no
CG10834	0.072818	0	1.21818	1	NA	no	no
CG10839	0	0	1.62753	NA	NA	no	no
CG10841	3.41201	0.343452	0.851829	0.459216	0.527379	no	no
CG10859	2.52265	1.55643	1.4574	0.0190255	0.0294338	no	no
CG10864	15.7265	0.0467644	0.439763	0.897575	0.924626	no	no
CG10869	2.25371	0	0.957872	1	1	no	no
CG10898	198.423	0.528127	0.160898	0.000733037	0.00138968	no	no
CG10899	0.506108	0	1.20663	1	NA	no	no
CG10903	268.795	0.0320717	0.132416	0.805246	0.848089	no	no
CG10904	171.101	-1.01165	0.186608	1.60515e-08	4.708e-08	yes	no
CG10907	271.922	-1.33443	0.155031	9.70312e-19	5.38397e-18	yes	no
CG1091	912.117	-0.0414365	0.0918657	0.649149	0.706772	no	no
CG10912	7.81447	-0.879669	0.77447	0.0780706	0.108769	no	no
CG10914	135.305	-0.490141	0.179898	0.00477725	0.00815616	no	no
CG10915	525.893	0.345762	0.139076	0.011171	0.0179597	no	no
CG10919	0.668741	0.0674168	0.995892	0.873487	0.904559	no	no
CG1092	56.0499	2.11759	0.408304	1.08177e-08	3.21336e-08	yes	yes
CG10920	0	0	1.62753	NA	NA	no	no
CG10932	947.472	0.789398	0.103489	1.10432e-14	4.98402e-14	no	no
CG10933	196.716	0.0545739	0.181571	0.75594	0.804451	no	no
CG10936	398.438	-0.845749	0.156298	2.53214e-08	7.28934e-08	no	no
CG10947	436.437	-0.0253942	0.201192	0.895364	0.923091	no	no
CG10949	127.029	-1.94652	0.219244	5.42577e-20	3.21223e-19	yes	no
CG10950	1.47941	0	1.00004	1	1	no	no
CG10962	36.1645	3.29919	0.806149	3.15607e-07	8.38838e-07	yes	yes
CG10970	2.09286	0.445893	0.906927	0.345508	0.414464	no	no
CG10979	1228.19	-0.26426	0.0873312	0.0022881	0.00408606	no	no
CG10996	1.78363	0.913772	1.21125	0.0910977	0.125351	no	no
CG11007	194.501	-2.02863	0.165329	1.0602e-35	1.30665e-34	yes	yes
CG11018	0	0	1.62753	NA	NA	no	no
CG1103	292.53	-2.0683	0.13987	1.42198e-50	2.65108e-49	yes	yes
CG11030	256.007	0.203369	0.154181	0.176474	0.227904	no	no
CG11034	296.299	-1.29719	0.158672	4.10933e-17	2.11108e-16	yes	no
CG11035	306.027	-0.605951	0.151869	4.22809e-05	9.17368e-05	no	no
CG11041	5.63927	0.523174	0.673959	0.251938	0.313974	no	no
CG11044	82.142	0.791276	0.294879	0.00319196	0.00558158	no	no
CG1105	2439.74	-0.834599	0.0979593	6.69151e-18	3.55886e-17	no	no
CG11050	4131.21	-0.49874	0.076211	4.5139e-11	1.60268e-10	no	no
CG11052	0.0898009	0	1.21818	1	NA	no	no
CG11068	1.61897	1.1518	1.30748	0.0493297	0.0712833	no	no
CG11069	694.344	-1.31157	0.136482	9.77942e-23	6.71206e-22	yes	no
CG11070	2107.8	-0.522722	0.0803503	5.66813e-11	1.99454e-10	no	no
CG11073	17951.1	0.779553	0.0663799	3.61086e-32	3.89745e-31	no	no
CG11077	178.394	5.66965	0.871631	2.16641e-12	8.40815e-12	yes	yes
CG11089	339.343	0.464619	0.150089	0.0015143	0.00277875	no	no
CG11095	185.288	1.2806	0.168669	4.53385e-15	2.07545e-14	yes	no
CG11099	132.221	-1.61451	0.184285	1.84846e-19	1.06604e-18	yes	no
CG11107	1330.32	-0.0766026	0.0813837	0.343321	0.412226	no	no
CG11110	78.99	1.11047	0.246121	1.38524e-06	3.48315e-06	no	no
CG11123	294.81	0.306057	0.157855	0.0465958	0.067657	no	no
CG11125	73.9652	-0.745777	0.296323	0.00565848	0.00954309	no	no
CG11127	319.923	-2.07077	0.183491	1.17971e-30	1.17217e-29	yes	yes
CG11131	0.309431	-0.219563	1.26602	0.558471	NA	no	no
CG11134	228.456	-1.45621	0.163386	5.43923e-20	3.21648e-19	yes	no
CG11137	1145.94	-0.894145	0.114885	2.57389e-15	1.20185e-14	no	no
CG11141	506.227	0.520127	0.106535	7.66276e-07	1.97224e-06	no	no
CG11145	0.0939444	0.0378927	1.21977	0.917087	NA	no	no
CG11147	9879.13	-0.0658121	0.0880556	0.45126	0.519678	no	no
CG11148	5687.49	-0.937991	0.0853176	1.33234e-28	1.20901e-27	no	no
CG11151	4205.48	0.546632	0.139616	6.31684e-05	0.000133828	no	no
CG11158	326.031	0.00898362	0.143902	0.949163	0.967992	no	no
CG11162	0	0	1.62753	NA	NA	no	no
CG11164	38.539	1.41317	0.368474	1.52232e-05	3.46269e-05	yes	no
CG11168	760.618	-0.224541	0.0895745	0.0114838	0.0184149	no	no
CG11170	92.7609	0.307725	0.20922	0.123725	0.165149	no	no
CG11178	346.259	0.0105657	0.109998	0.922533	0.945776	no	no
CG11190	918.249	0.426005	0.108886	7.41384e-05	0.000156038	no	no
CG11191	278.782	-0.549292	0.136241	3.86181e-05	8.42174e-05	no	no
CG11192	0	0	1.62753	NA	NA	no	no
CG11200	2304.34	-1.25978	0.0905755	8.26383e-45	1.3158e-43	yes	no
CG11208	1537.86	0.413735	0.0819493	3.67235e-07	9.71022e-07	no	no
CG11210	3318.48	-0.292205	0.069609	2.45253e-05	5.4837e-05	no	no
CG11221	21.3267	1.16812	0.516221	0.00466087	0.00796807	no	no
CG11226	1.17081	0.259739	1.03007	0.549905	0.615582	no	no
CG11236	37.6408	0.184867	0.4317	0.606607	0.667542	no	no
CG1124	14020.4	3.4506	0.0995258	8.56862e-266	3.66094e-263	yes	yes
CG11241	201.761	1.97518	0.25341	4.83094e-16	2.33442e-15	yes	no
CG11247	415.88	-1.24482	0.139498	6.94474e-20	4.08322e-19	yes	no
CG11248	451.846	0.371372	0.118536	0.00147265	0.00270643	no	no
CG11249	1.67151	0.56033	1.01672	0.246242	0.307923	no	no
CG11251	0	0	1.62753	NA	NA	no	no
CG11257	177.604	-1.76826	0.165139	8.53718e-28	7.52064e-27	yes	no
CG11267	597.635	-0.0594723	0.137392	0.659021	0.715858	no	no
CG11269	0	0	1.62753	NA	NA	no	no
CG11275	2033.13	0.893127	0.143244	1.63983e-10	5.5752e-10	no	no
CG11279	129.437	-1.82374	0.221338	1.46424e-17	7.67604e-17	yes	no
CG11289	3.19702	-1.50261	1.37166	0.0204066	0.0313906	no	no
CG11298	0.403375	-0.15126	1.18597	0.693998	NA	no	no
CG11307	408.045	-1.57199	0.111668	5.2029e-46	8.44154e-45	yes	no
CG11309	1783.06	0.524118	0.0952401	2.71878e-08	7.80468e-08	no	no
CG11318	0.939789	0.5309	1.18938	0.251203	0.313133	no	no
CG11320	1.06134	-0.259008	0.949212	0.56256	0.626738	no	no
CG11333	0.0939444	0.0378927	1.21977	0.917087	NA	no	no
CG11340	0.500121	0.0266046	1.09221	0.946857	NA	no	no
CG11342	40.6216	-2.14473	0.395944	3.01693e-09	9.30673e-09	yes	yes
CG1136	368.041	2.13823	0.133491	7.15988e-59	1.73975e-57	yes	no
CG11368	29949.2	1.02036	0.0873875	4.44729e-32	4.78013e-31	no	no
CG11369	0	0	1.62753	NA	NA	no	no
CG11373	0	0	1.62753	NA	NA	no	no
CG11377	813.443	0.24637	0.119822	0.0368934	0.054558	no	no
CG11378	1617.64	6.38375	0.168026	0	0	yes	yes
CG11379	0	0	1.62753	NA	NA	no	no
CG11382	0.966555	0.0558161	1.10003	0.888502	0.916938	no	no
CG11384	0.345052	0.148558	1.14572	0.706438	NA	no	no
CG1139	13.9563	2.46653	1.44015	0.00171795	0.00313449	no	no
CG11391	30.8152	1.85439	1.18029	0.00545514	0.00922748	no	no
CG11399	614.126	0.921551	0.129963	4.52117e-13	1.82808e-12	no	no
CG11400	638.416	4.52848	0.181001	1.07947e-139	1.10689e-137	yes	yes
CG11403	122.308	-1.79052	0.248176	4.52346e-14	1.96541e-13	yes	no
CG11404	0	0	1.62753	NA	NA	no	no
CG11407	8446.04	0.11384	0.867259	0.799049	0.842427	no	no
CG11409	94.9333	-1.90042	0.343896	2.27518e-09	7.09973e-09	yes	no
CG11412	543.136	0.233962	0.116317	0.0413744	0.0606596	no	no
CG11413	1.57335	0.0825858	0.974471	0.847183	0.883185	no	no
CG11414	1273.87	0.381071	0.0735645	1.88802e-07	5.11081e-07	no	no
CG11417	260.155	0.249451	0.156809	0.102722	0.13977	no	no
CG11425	427.985	1.78072	0.18627	1.05161e-22	7.17926e-22	yes	no
CG11426	860.599	2.09799	0.145755	4.3718e-48	7.52154e-47	yes	no
CG11436	115.302	0.521949	0.199139	0.00621221	0.0103983	no	no
CG11437	14.5435	0.283881	0.62501	0.515798	0.582232	no	no
CG11444	1159.51	1.37156	0.095334	7.53324e-48	1.29174e-46	yes	no
CG11447	144.115	-0.682491	0.19326	0.000229833	0.000460115	no	no
CG11453	39.3593	1.92006	0.845204	0.00107719	0.00200827	no	no
CG11454	262.159	1.03026	0.17119	4.56197e-10	1.49739e-09	no	no
CG1146	557.086	1.98552	0.158216	3.38225e-37	4.35698e-36	yes	no
CG11523	173.503	-0.0574638	0.18287	0.745099	0.794699	no	no
CG11529	197.737	2.74438	0.247273	1.94079e-30	1.90621e-29	yes	yes
CG11534	486.083	-0.305819	0.107719	0.00405655	0.00699325	no	no
CG11539	81.0269	0.357624	0.224054	0.0925269	0.127113	no	no
CG11550	29637.4	-2.13591	0.0870342	4.18144e-134	3.7611e-132	yes	yes
CG11562	58.2689	-0.407895	0.292256	0.127218	0.169503	no	no
CG11563	234.743	0.963116	0.157282	2.79857e-10	9.32312e-10	no	no
CG11576	1907.96	2.03451	0.0968415	4.72047e-99	2.65955e-97	yes	no
CG11581	0	0	1.62753	NA	NA	no	no
CG11583	411.308	-0.279889	0.123063	0.0208604	0.0320118	no	no
CG11586	170.5	-0.503071	0.175939	0.0031048	0.00544029	no	no
CG11590	268.069	1.60941	0.166941	5.19002e-23	3.6203e-22	yes	no
CG11596	280.092	0.50961	0.14708	0.000388386	0.000761184	no	no
CG11619	4.88702	-1.02305	1.17118	0.0671964	0.0948557	no	no
CG11629	0	0	1.62753	NA	NA	no	no
CG11634	0	0	1.62753	NA	NA	no	no
CG11635	15.2953	-0.301226	0.462638	0.422232	0.49222	no	no
CG11638	38.604	-0.33116	0.370795	0.304887	0.371826	no	no
CG11652	2843.17	0.689408	0.156825	6.12809e-06	1.4492e-05	no	no
CG11655	2276.41	-0.0629749	0.0959918	0.507825	0.574117	no	no
CG11656	0.363918	0.0511634	1.12748	0.895825	NA	no	no
CG11659	0.849718	-0.526221	1.33802	0.234354	0.294205	no	no
CG11663	0.261747	-0.0479265	1.22073	0.8953	NA	no	no
CG11664	0	0	1.62753	NA	NA	no	no
CG11666	0	0	1.62753	NA	NA	no	no
CG11672	0.0716119	0	1.21818	1	NA	no	no
CG11674	63.5939	2.73308	1.57796	0.00124088	0.00230008	yes	yes
CG11679	225.115	-0.375755	0.148171	0.00944247	0.0153639	no	no
CG11686	199.78	0.163856	0.232241	0.455964	0.523905	no	no
CG11693	1.57917	-0.298632	1.02161	0.498645	0.565109	no	no
CG11697	0.242983	-0.135044	1.23824	0.713396	NA	no	no
CG11699	397.793	0.139427	0.12936	0.272892	0.336569	no	no
CG11722	242.54	-1.45713	0.166791	2.63008e-19	1.50328e-18	yes	no
CG11741	5.0873	0.37981	0.899335	0.414609	0.484656	no	no
CG11753	308.396	-0.917833	0.139011	1.38224e-11	5.08009e-11	no	no
CG11755	55.0147	-2.502	0.359541	9.59908e-14	4.07068e-13	yes	yes
CG11760	55.1497	0.709755	0.270586	0.00448982	0.00769619	no	no
CG11777	91.9589	-1.37111	0.258055	1.36117e-08	4.01537e-08	yes	no
CG11779	774.888	0.0375963	0.0994862	0.702663	0.755569	no	no
CG11781	327.462	0.207929	0.154442	0.167651	0.217496	no	no
CG11786	4.1405	-4.51775	1.75605	5.47932e-05	0.000117198	no	no
CG11788	38.6082	-0.02322	0.333722	0.937956	0.958712	no	no
CG11796	2777.57	-2.1817	0.178326	1.35751e-35	1.66108e-34	yes	yes
CG11807	1052.98	-0.776256	0.0795035	7.68976e-23	5.33497e-22	no	no
CG11808	93.0708	-1.00776	0.275705	7.06337e-05	0.000148967	yes	no
CG11811	282.206	0.258977	0.139879	0.0588394	0.0841478	no	no
CG11816	0.366053	0.192837	1.24852	0.606659	NA	no	no
CG11825	76.2078	1.01993	0.277152	6.23271e-05	0.00013221	no	no
CG11835	156.91	3.28692	0.32255	1.07654e-26	8.96009e-26	yes	yes
CG11839	131.192	-1.73362	0.22404	8.88132e-16	4.23183e-15	yes	no
CG11842	346.006	-2.07088	0.131456	5.26687e-57	1.22742e-55	yes	yes
CG11857	1217.12	0.886406	0.100978	6.15908e-19	3.46626e-18	no	no
CG11858	135.074	1.07495	0.228005	5.65801e-07	1.47702e-06	no	no
CG11865	0	0	1.62753	NA	NA	no	no
CG11885	85.5088	1.50043	0.251733	2.63318e-10	8.82374e-10	yes	no
CG11889	28.2378	-0.601388	0.403195	0.079262	0.110248	no	no
CG11906	242.255	-0.0748545	0.140712	0.587263	0.64918	no	no
CG11911	3.02079	0.642015	1.02801	0.195366	0.249226	no	no
CG11912	0.0716119	0	1.21818	1	NA	no	no
CG11920	189.118	-1.34419	0.182695	2.41605e-14	1.06785e-13	yes	no
CG11929	2.43143	-2.54975	1.97724	0.00365998	0.00635661	no	no
CG11964	521.36	-0.225607	0.110005	0.0378302	0.0558145	no	no
CG11966	0.937918	-0.307078	1.0238	0.487455	0.555126	no	no
CG11970	981.566	0.384341	0.0935609	3.37741e-05	7.40949e-05	no	no
CG11975	659.992	0.256651	0.0915424	0.00468203	0.00800159	no	no
CG11977	2.13633	-1.12162	1.21943	0.0519297	0.0748928	no	no
CG11980	511.195	-1.51133	0.14187	1.74455e-27	1.51599e-26	yes	no
CG11985	223.979	-1.14371	0.196195	1.09528e-09	3.49441e-09	yes	no
CG11999	970.934	0.820743	0.0964975	7.82822e-18	4.14621e-17	no	no
CG12003	0.305862	-0.218076	1.26548	0.560954	NA	no	no
CG12006	620.901	-0.0260214	0.0916031	0.774494	0.821268	no	no
CG12007	499.513	-0.944867	0.104542	5.10753e-20	3.03082e-19	no	no
CG12016	592.115	0.14555	0.106268	0.165876	0.215521	no	no
CG12018	115.097	-0.318688	0.216063	0.121521	0.162673	no	no
CG12024	297.91	0.802498	0.123185	3.2654e-11	1.17075e-10	no	no
CG12025	772.619	-0.329319	0.108426	0.00210467	0.00378618	no	no
CG12027	0.618861	-0.387302	1.30004	0.344645	NA	no	no
CG12034	403.273	-0.246953	0.138006	0.0679886	0.0958948	no	no
CG12035	0.403128	0.257938	1.1529	0.529261	NA	no	no
CG12038	61.2651	-0.771867	0.271645	0.00205805	0.00370753	no	no
CG12050	685.038	-0.248533	0.104291	0.0159485	0.0249749	no	no
CG12056	470.707	0.875502	0.125226	1.03275e-12	4.0699e-12	no	no
CG12057	0.946634	0	1.21647	1	1	no	no
CG12081	347.802	0.476305	0.148828	0.0010448	0.00195215	no	no
CG12090	2079.47	0.526384	0.0642927	1.95224e-16	9.61492e-16	no	no
CG12091	1095.84	1.56559	0.142195	3.38853e-29	3.17025e-28	yes	no
CG12096	624.463	-0.427028	0.105316	4.07102e-05	8.85913e-05	no	no
CG12099	4331.11	0.383153	0.0827147	3.0696e-06	7.45869e-06	no	no
CG12104	236.403	1.39802	0.168697	1.36715e-17	7.17439e-17	yes	no
CG12106	107.993	0.2117	0.21239	0.296475	0.362602	no	no
CG12107	466.013	-0.686465	0.157481	7.29901e-06	1.70487e-05	no	no
CG12111	6.50916	0.0671154	0.578674	0.873384	0.904559	no	no
CG12115	1.03191	-0.266665	1.0522	0.536494	0.603071	no	no
CG12116	504.678	1.17084	0.260821	1.34887e-06	3.39669e-06	no	no
CG12118	470.595	1.70947	0.147533	4.49475e-32	4.82104e-31	yes	no
CG12121	2738.31	0.803905	0.0628431	8.16838e-38	1.08215e-36	no	no
CG12123	107.777	0.587496	0.214193	0.00392092	0.0067731	no	no
CG12125	359.095	0.429448	0.166366	0.00783967	0.0129117	no	no
CG12126	0	0	1.62753	NA	NA	no	no
CG12128	432.489	1.44212	0.116802	5.60076e-36	6.95281e-35	yes	no
CG12134	152.186	-1.16693	0.182345	2.894e-11	1.03977e-10	yes	no
CG12147	0.072818	0	1.21818	1	NA	no	no
CG12155	416.486	0.875124	0.120121	1.21927e-13	5.11137e-13	no	no
CG12158	21103.7	-0.585734	0.342438	0.0534261	0.0768993	no	no
CG12159	159.878	1.973	0.217181	8.20551e-21	5.09318e-20	yes	no
CG12162	815.04	0.478414	0.0983517	8.83521e-07	2.26216e-06	no	no
CG12164	0.936985	0	1.13101	1	1	no	no
CG12179	110.66	-1.92336	0.248587	7.91139e-16	3.78021e-15	yes	no
CG1218	330.324	-0.315324	0.123415	0.00942912	0.0153519	no	no
CG12182	189.632	-1.66694	0.167585	2.44248e-24	1.82812e-23	yes	no
CG12194	230.771	1.63415	0.180594	1.36777e-20	8.3682e-20	yes	no
CG12203	1709.95	0.299669	0.113702	0.00755311	0.0124665	no	no
CG12207	2558.62	0.141235	0.103425	0.167397	0.217277	no	no
CG12209	1.06906	-0.255374	1.04091	0.554286	0.619404	no	no
CG12219	313.891	0.632701	0.168154	0.00010259	0.000212688	no	no
CG12229	65.067	6.77928	0.870456	2.97556e-16	1.45016e-15	yes	yes
CG12231	0	0	1.62753	NA	NA	no	no
CG12237	742.068	0.765722	0.12299	2.31861e-10	7.7951e-10	no	no
CG12253	154.893	-2.30763	0.228166	2.4006e-25	1.85639e-24	yes	yes
CG12262	8571.28	-0.567688	0.0684276	7.42794e-17	3.74097e-16	no	no
CG12267	268.347	-2.32573	0.163057	1.90883e-47	3.21927e-46	yes	yes
CG1227	236.13	-6.48013	0.412871	7.97251e-57	1.84122e-55	yes	yes
CG12272	830.563	-0.687421	0.0963211	5.41597e-13	2.17275e-12	no	no
CG12290	1418.98	0.345673	0.128935	0.00636486	0.0106365	no	no
CG12307	0.367491	0.103055	1.22735	0.778725	NA	no	no
CG12321	912.783	0.0640174	0.0812817	0.427827	0.49795	no	no
CG12325	375.44	-1.37958	0.125686	5.94863e-29	5.50517e-28	yes	no
CG1233	1338.09	0.650584	0.0876364	6.89889e-14	2.95741e-13	no	no
CG12333	291.419	0.39776	0.127342	0.00148276	0.00272281	no	no
CG12338	219.278	0.00297338	0.174579	0.985984	0.999134	no	no
CG1234	672.296	-1.53456	0.124918	1.11292e-35	1.36833e-34	yes	no
CG12341	124.46	0.266622	0.195858	0.156645	0.204773	no	no
CG12343	315.488	-0.662337	0.148294	4.64954e-06	1.11393e-05	no	no
CG12360	1525.97	-0.489695	0.0801963	7.77625e-10	2.51538e-09	no	no
CG12362	0.360472	0	1.21818	1	NA	no	no
CG12374	29.8813	1.52671	1.82391	0.0236806	0.0360025	no	no
CG12375	992.379	-0.0747878	0.114278	0.507202	0.573538	no	no
CG12379	87.111	-1.22833	0.219687	3.69504e-09	1.12765e-08	yes	no
CG1239	128.624	-0.929253	0.198955	9.93795e-07	2.52112e-06	no	no
CG12391	600.021	0.35359	0.111163	0.00127023	0.00235191	no	no
CG12395	0	0	1.62753	NA	NA	no	no
CG12400	857.329	0.262677	0.109562	0.0151988	0.0239106	no	no
CG12404	1002.86	0.0616016	0.114736	0.586344	0.648724	no	no
CG12426	0.317576	0.173767	1.24236	0.641073	NA	no	no
CG12438	0.237168	0.037894	1.21977	0.917084	NA	no	no
CG12439	0	0	1.62753	NA	NA	no	no
CG12446	0.171371	-0.135045	1.23824	0.713394	NA	no	no
CG12448	11.1641	0.366653	0.909547	0.428872	0.49894	no	no
CG1246	16.2826	-0.324183	0.4361	0.369845	0.439851	no	no
CG12464	0.0939444	0.0378927	1.21977	0.917087	NA	no	no
CG12470	2.65006	0.0964809	0.869528	0.828831	0.868291	no	no
CG12479	0	0	1.62753	NA	NA	no	no
CG12496	0.14443	0	1.21818	1	NA	no	no
CG12498	0.345158	0.0409759	1.19625	0.912092	NA	no	no
CG12507	59.191	3.37178	0.883094	9.69202e-07	2.46359e-06	yes	yes
CG12511	0	0	1.62753	NA	NA	no	no
CG12512	1992.16	-1.71053	0.142537	3.31426e-34	3.87067e-33	yes	no
CG12516	0	0	1.62753	NA	NA	no	no
CG12517	0.54358	0.112232	1.20892	0.763604	NA	no	no
CG12531	76.3717	0.383538	0.257762	0.11075	0.149779	no	no
CG12540	0	0	1.62753	NA	NA	no	no
CG12541	96.0392	2.02642	0.247336	1.84315e-17	9.58399e-17	yes	no
CG12576	1986.07	0.766069	0.106479	3.04212e-13	1.24179e-12	no	no
CG12589	0	0	1.62753	NA	NA	no	no
CG12590	0.14443	0	1.21818	1	NA	no	no
CG12608	271.468	0.223956	0.177148	0.191626	0.245065	no	no
CG12609	0	0	1.62753	NA	NA	no	no
CG12617	0	0	1.62753	NA	NA	no	no
CG12620	0.0939444	0.0378927	1.21977	0.917087	NA	no	no
CG12637	0	0	1.62753	NA	NA	no	no
CG12643	10.3581	-0.204418	0.591443	0.631456	0.691182	no	no
CG12645	7.23859	-1.3577	0.743831	0.00885126	0.014457	no	no
CG1265	189.135	1.03001	0.184617	6.26225e-09	1.8864e-08	no	no
CG12655	456.509	0.956822	0.202117	6.82261e-07	1.76843e-06	no	no
CG12659	38.1778	-0.752749	0.347946	0.0141335	0.0223511	no	no
CG12661	0	0	1.62753	NA	NA	no	no
CG12674	0	0	1.62753	NA	NA	no	no
CG12679	0.363347	0.0378947	1.21977	0.917083	NA	no	no
CG12680	0.202506	0.0378934	1.21977	0.917086	NA	no	no
CG12682	0	0	1.62753	NA	NA	no	no
CG12689	14.6171	1.82904	1.11797	0.00505945	0.00859788	no	no
CG12698	0.503634	0	1.14493	1	NA	no	no
CG12699	0.436686	-0.140596	1.23461	0.703597	NA	no	no
CG12702	48.7314	-2.34946	0.394852	9.75649e-11	3.37755e-10	yes	yes
CG12708	2.70661	0.477536	1.00668	0.310406	0.377748	no	no
CG12713	68.4857	-0.341898	0.251127	0.146037	0.192446	no	no
CG12716	2.3157	0	1.04318	1	1	no	no
CG12721	3.11907	-1.57315	1.29825	0.0156595	0.0245523	no	no
CG12729	0	0	1.62753	NA	NA	no	no
CG1273	446.619	-3.25484	0.152256	9.24912e-104	5.64527e-102	yes	yes
CG12730	363.847	0.570896	0.178356	0.000915226	0.00171944	no	no
CG12736	452.282	1.0848	0.137957	8.40176e-16	4.01078e-15	no	no
CG12744	16.1659	1.01621	0.515547	0.0129767	0.0206235	no	no
CG12746	1498.02	0.595166	0.0821954	2.95239e-13	1.20709e-12	no	no
CG12768	44.334	-0.0556321	0.302305	0.84004	0.877523	no	no
CG12773	1220.33	1.36532	0.0902252	1.20423e-52	2.35652e-51	yes	no
CG12782	0	0	1.62753	NA	NA	no	no
CG12795	252.621	-0.12989	0.13209	0.316811	0.384528	no	no
CG12796	0.251214	0	1.21818	1	NA	no	no
CG12811	733.669	0.974887	0.106475	1.59921e-20	9.73768e-20	no	no
CG12818	121.945	0.0569404	0.186394	0.751643	0.80068	no	no
CG12825	372.445	1.66032	0.132856	7.40098e-37	9.39228e-36	yes	no
CG12826	140.652	9.94963	1.18005	1.7751e-18	9.74404e-18	yes	yes
CG12828	0	0	1.62753	NA	NA	no	no
CG12831	0.0716119	0	1.21818	1	NA	no	no
CG12848	244.782	-0.934319	0.166105	6.08769e-09	1.83706e-08	no	no
CG12849	0.13806	-0.135045	1.23824	0.713394	NA	no	no
CG12858	278.072	0.35704	0.137762	0.00818915	0.013457	no	no
CG12859	667	-0.298453	0.111637	0.00675912	0.0112477	no	no
CG12861	0.541334	0.239868	1.25789	0.529899	NA	no	no
CG12863	118.852	-1.81522	0.220899	1.76895e-17	9.21687e-17	yes	no
CG12866	0.179602	0	1.21818	1	NA	no	no
CG12869	282.947	-0.599615	0.136451	7.21107e-06	1.68895e-05	no	no
CG12880	5.49638	2.16062	1.5887	0.00502797	0.00855572	no	no
CG12895	371.698	-2.63221	0.173258	8.5796e-54	1.78088e-52	yes	yes
CG12909	93.1612	-1.54971	0.245741	2.83333e-11	1.02012e-10	yes	no
CG1291	1056.96	1.64457	0.0869975	1.0391e-80	4.06676e-79	yes	no
CG12913	34.3019	-1.41779	0.358452	9.18275e-06	2.12455e-05	yes	no
CG12914	0	0	1.62753	NA	NA	no	no
CG12920	0	0	1.62753	NA	NA	no	no
CG12926	352.976	-0.973163	0.17953	1.77051e-08	5.17822e-08	no	no
CG12929	93.0517	-0.916526	0.285623	0.000449862	0.000874646	no	no
CG12935	117.175	-1.72319	0.206177	5.72064e-18	3.05518e-17	yes	no
CG12948	204.325	-0.583595	0.161887	0.000205896	0.000414298	no	no
CG12963	1.51383	0.575721	1.09305	0.231282	0.290989	no	no
CG12975	102.174	-0.990744	0.193136	8.28389e-08	2.29948e-07	no	no
CG12984	0.269297	0.0378941	1.21977	0.917084	NA	no	no
CG12985	8.79376	2.53869	1.48797	0.00160635	0.0029424	no	no
CG12986	1.17567	-0.491573	1.09009	0.290765	0.356554	no	no
CG12995	0.072818	0	1.21818	1	NA	no	no
CG13000	0	0	1.62753	NA	NA	no	no
CG13004	66.5017	-0.694716	0.27124	0.00551737	0.00932352	no	no
CG13005	80.2244	0.366207	0.263966	0.135801	0.180096	no	no
CG13010	1.29092	0.938206	1.24256	0.0854123	0.118386	no	no
CG13012	143.196	1.58056	0.232125	9.47939e-13	3.74429e-12	yes	no
CG13014	221.452	1.31468	0.169587	1.22134e-15	5.76593e-15	yes	no
CG13016	214.84	-0.0146679	0.159311	0.924729	0.946703	no	no
CG13018	53.8911	-1.34935	0.29162	4.92267e-07	1.28834e-06	yes	no
CG13024	560.469	-0.326458	0.114337	0.0037949	0.00657313	no	no
CG13026	1.61177	0.839803	1.11149	0.111296	0.150439	no	no
CG13028	0.685865	-0.35295	1.08592	0.422377	0.492278	no	no
CG13029	4.63796	-1.47035	0.97439	0.0125199	0.0199471	no	no
CG13033	0	0	1.62753	NA	NA	no	no
CG13041	0.294566	0.164219	1.2396	0.658765	NA	no	no
CG13045	0	0	1.62753	NA	NA	no	no
CG13046	2.12914	-1.94264	1.86739	0.0107006	0.0172468	no	no
CG13054	0.506976	-0.309409	1.29298	0.427819	NA	no	no
CG13055	4.38536	-1.21574	0.88779	0.0267318	0.040417	no	no
CG13063	0	0	1.62753	NA	NA	no	no
CG13064	0	0	1.62753	NA	NA	no	no
CG13069	0.072818	0	1.21818	1	NA	no	no
CG1307	545.34	1.69983	0.112173	6.86684e-53	1.36458e-51	yes	no
CG13071	0	0	1.62753	NA	NA	no	no
CG13081	0.187889	0.103054	1.22735	0.778727	NA	no	no
CG13082	8.10893	-0.769829	0.582878	0.0766235	0.106956	no	no
CG13083	6.41305	0.247788	1.17259	0.539465	0.605349	no	no
CG13088	80.4997	-1.0643	0.235531	1.49257e-06	3.74383e-06	yes	no
CG1309	2818.92	0.830353	0.0799518	1.22169e-25	9.65983e-25	no	no
CG13090	881.76	-0.09385	0.0850998	0.26657	0.329723	no	no
CG13097	237.494	-1.24281	0.168287	2.37723e-14	1.0516e-13	yes	no
CG13101	1509.32	1.41353	0.206308	8.50657e-13	3.36781e-12	yes	no
CG13108	13.2155	1.24082	0.61232	0.00721754	0.0119484	no	no
CG1311	2270.69	-0.283926	0.067346	2.27604e-05	5.10466e-05	no	no
CG13110	0	0	1.62753	NA	NA	no	no
CG13116	365.804	-0.302076	0.140309	0.0279733	0.0421202	no	no
CG13117	111.517	2.20841	0.275504	6.09442e-17	3.09367e-16	yes	no
CG13126	86.2957	-1.07588	0.242745	2.18004e-06	5.38135e-06	yes	no
CG13127	0.450273	0	1.14927	1	NA	no	no
CG13133	23.4245	0.965239	0.487292	0.014101	0.0223135	no	no
CG13148	3.18874	-1.19094	1.05702	0.0378648	0.0558495	no	no
CG13151	179.374	-0.315028	0.198156	0.097677	0.133508	no	no
CG13154	0.348938	-0.204956	1.26097	0.583221	NA	no	no
CG13157	0	0	1.62753	NA	NA	no	no
CG13168	0.399787	0.0530176	1.11628	0.8929	NA	no	no
CG13170	0.072818	0	1.21818	1	NA	no	no
CG13171	0	0	1.62753	NA	NA	no	no
CG13177	4.11837	3.69097	1.75699	0.000254948	0.000508409	no	no
CG13183	8.31025	-1.551	0.705853	0.00259736	0.00461249	no	no
CG13185	1199.24	-0.725822	0.113939	9.91517e-11	3.42786e-10	no	no
CG13186	0.200622	0.110335	1.22834	0.763887	NA	no	no
CG1319	424.921	0.396573	0.116033	0.000525926	0.00101445	no	no
CG13192	148.15	-0.260839	0.181612	0.137243	0.181914	no	no
CG13193	0.214836	0	1.21818	1	NA	no	no
CG13204	130.665	0.361705	0.202319	0.061998	0.0880997	no	no
CG13215	44.0604	0.256034	0.350985	0.408674	0.478562	no	no
CG13216	0	0	1.62753	NA	NA	no	no
CG13220	632.852	-0.589346	0.111003	7.3045e-08	2.03644e-07	no	no
CG13228	0	0	1.62753	NA	NA	no	no
CG13229	71.9777	1.51482	0.272324	2.73685e-09	8.47846e-09	yes	no
CG13230	0	0	1.62753	NA	NA	no	no
CG13231	0.26809	0.0378941	1.21977	0.917084	NA	no	no
CG13239	0.737864	0	1.08883	1	1	no	no
CG1324	0.375777	0.199854	1.25099	0.594313	NA	no	no
CG13244	0.242983	-0.135044	1.23824	0.713396	NA	no	no
CG13247	5.43885	-0.356684	0.86336	0.442926	0.511921	no	no
CG13248	112.907	-0.0531384	0.20582	0.787512	0.832318	no	no
CG13255	117.094	0.0541544	0.192946	0.770666	0.818055	no	no
CG13258	2.79284	2.14269	1.59816	0.00532012	0.00901098	no	no
CG13272	0.790232	-0.494165	1.3268	0.256082	0.318108	no	no
CG13282	6.2	2.15138	1.25028	0.00255034	0.00453383	no	no
CG13285	228.714	0.117407	0.159613	0.450275	0.518894	no	no
CG13293	49.1257	0.406228	0.286702	0.122742	0.164137	no	no
CG13295	613.754	-0.740905	0.0934913	1.17019e-15	5.53977e-15	no	no
CG13296	12.401	-5.92473	1.39094	2.56935e-07	6.87171e-07	yes	yes
CG13297	5.98818	-0.362583	0.627692	0.409327	0.479027	no	no
CG13298	485.324	-0.808718	0.109851	8.02894e-14	3.42466e-13	no	no
CG13305	0	0	1.62753	NA	NA	no	no
CG13306	6.58501	1.75195	1.18456	0.00765075	0.0126167	no	no
CG13309	0.0939444	0.0378927	1.21977	0.917087	NA	no	no
CG13310	16.4542	1.26949	0.659779	0.00859071	0.0140807	no	no
CG13311	0.0939444	0.0378927	1.21977	0.917087	NA	no	no
CG13312	0.072818	0	1.21818	1	NA	no	no
CG13313	1.57217	-0.321338	0.977043	0.476176	0.544459	no	no
CG13314	1.10002	0.220396	0.972952	0.616075	0.676653	no	no
CG13315	97.1349	0.364339	0.365753	0.254053	0.316148	no	no
CG13318	566.449	1.37136	0.118301	5.47085e-32	5.85575e-31	yes	no
CG13321	2.36221	1.13249	1.38388	0.0526319	0.0758201	no	no
CG13323	1.00895	0.230383	1.02541	0.593301	0.655316	no	no
CG13326	0.179602	0	1.21818	1	NA	no	no
CG13330	0.274118	0.037894	1.21977	0.917084	NA	no	no
CG13332	115.839	-3.42457	0.3757	3.77098e-22	2.50763e-21	yes	yes
CG13334	0.520207	0.253221	1.19668	0.526132	NA	no	no
CG13339	310.143	-1.936	0.145872	2.96585e-41	4.25936e-40	yes	no
CG13344	150.852	0.462996	0.167864	0.00446624	0.00765832	no	no
CG13358	2.50804	0.00110922	0.72909	0.998029	1	no	no
CG13360	127.422	1.68624	0.276311	9.10303e-11	3.15987e-10	yes	no
CG13361	0.594535	0.0504349	1.13199	0.896977	NA	no	no
CG13362	2.82938	-1.79772	1.60651	0.0120395	0.0192354	no	no
CG13365	152.995	0.503156	0.181848	0.00413048	0.00711592	no	no
CG13367	197.683	0.426975	0.178791	0.0134741	0.0213676	no	no
CG13369	555.184	0.432485	0.121417	0.000295833	0.000587125	no	no
CG13373	69.2477	-0.376358	0.238634	0.0941288	0.129072	no	no
CG13375	16.2796	-0.351545	0.46062	0.347821	0.416654	no	no
CG13377	1348.9	2.46947	0.161198	2.02204e-54	4.23142e-53	yes	yes
CG1339	8.81237	-3.02034	0.959057	1.6161e-05	3.6695e-05	no	no
CG13390	117.316	-1.28828	0.225404	1.58939e-09	5.0054e-09	yes	no
CG13392	123.871	1.2718	0.240969	1.97322e-08	5.72535e-08	yes	no
CG13397	260.297	-0.29882	0.309862	0.287376	0.352651	no	no
CG13398	182.749	-0.170584	0.162652	0.281212	0.345667	no	no
CG13403	0.791349	0	1.15301	1	1	no	no
CG13405	5.1066	-1.90625	1.08434	0.00349351	0.00608811	no	no
CG13408	6.06535	0.417557	0.73371	0.367167	0.436969	no	no
CG13409	113.562	0.488717	0.187777	0.00685719	0.0113961	no	no
CG13426	2.77428	0.0917739	0.939926	0.833123	0.872074	no	no
CG13436	24.9745	-3.04035	0.576368	1.18045e-09	3.74747e-09	yes	yes
CG13437	61.8678	-1.12164	0.282893	1.55587e-05	3.53588e-05	yes	no
CG13443	0	0	1.62753	NA	NA	no	no
CG13445	0.106678	0.0378927	1.21977	0.917087	NA	no	no
CG13454	1.5894	-0.38889	0.896394	0.404699	0.474587	no	no
CG13458	19.219	-1.19534	0.679745	0.0142114	0.0224605	no	no
CG13465	0.171371	-0.135045	1.23824	0.713394	NA	no	no
CG13473	1.69111	-0.0684602	0.827169	0.87892	0.90833	no	no
CG13477	0.143224	0	1.21818	1	NA	no	no
CG13484	71.2875	-0.113742	0.241949	0.617804	0.678262	no	no
CG13488	1.94298	0	0.980604	1	1	no	no
CG13500	0.330422	-0.145335	1.21843	0.698205	NA	no	no
CG13501	0	0	1.62753	NA	NA	no	no
CG13506	1065.74	2.50892	0.115705	9.44073e-106	5.97563e-104	yes	yes
CG13510	434.678	-4.29741	0.19105	8.95325e-114	6.20315e-112	yes	yes
CG13516	321.854	0.662528	0.123955	5.32264e-08	1.49941e-07	no	no
CG13526	0.0939444	0.0378927	1.21977	0.917087	NA	no	no
CG13531	2338.2	-0.5324	0.0811324	3.83582e-11	1.36856e-10	no	no
CG13532	61.182	1.43132	0.273082	1.83797e-08	5.35414e-08	yes	no
CG13538	0.559469	0	1.12387	1	NA	no	no
CG13539	0	0	1.62753	NA	NA	no	no
CG13541	0	0	1.62753	NA	NA	no	no
CG13544	0.453148	0.037895	1.21977	0.917082	NA	no	no
CG13557	0	0	1.62753	NA	NA	no	no
CG13558	0	0	1.62753	NA	NA	no	no
CG13559	1.53171	-0.109072	0.874129	0.806884	0.849414	no	no
CG13563	9.14887	2.98794	1.50243	0.000531881	0.00102481	no	no
CG13564	0	0	1.62753	NA	NA	no	no
CG13565	0.932836	-0.0953424	1.00639	0.821459	0.86233	no	no
CG13566	2.31705	0.751357	0.983481	0.142145	0.187829	no	no
CG13575	38.8342	2.13601	0.563227	5.94907e-06	1.40947e-05	yes	yes
CG13578	468.234	-0.589793	0.14118	1.93757e-05	4.37425e-05	no	no
CG1358	132.333	2.38042	0.245126	1.13484e-23	8.18331e-23	yes	yes
CG13581	0	0	1.62753	NA	NA	no	no
CG13585	1340.87	-1.17755	0.0994219	4.09545e-33	4.63518e-32	yes	no
CG13599	26.136	-2.43049	0.506391	4.31191e-08	1.22206e-07	yes	yes
CG1360	50.1124	0.287383	0.270833	0.252495	0.314591	no	no
CG13601	255.108	0.174159	0.142119	0.210896	0.267176	no	no
CG13605	896.998	0.308278	0.103624	0.00262432	0.00465566	no	no
CG13607	131.508	0.241802	0.28115	0.351082	0.420266	no	no
CG13613	0	0	1.62753	NA	NA	no	no
CG13622	15.3608	0.0526746	0.40116	0.877498	0.907409	no	no
CG13623	213.478	0.335323	0.17339	0.0459512	0.0667399	no	no
CG13630	509.289	-0.311292	0.100583	0.00176076	0.00320804	no	no
CG13634	1.17233	-0.508125	1.10002	0.277039	0.340945	no	no
CG13639	23.6469	0.389681	0.790434	0.403838	0.473794	no	no
CG13640	4.38585	0.318733	0.934025	0.484425	0.552044	no	no
CG13653	0	0	1.62753	NA	NA	no	no
CG13663	443.203	-0.363328	0.132741	0.00529354	0.00896892	no	no
CG13667	234.954	-0.926093	0.149599	2.00901e-10	6.79432e-10	no	no
CG13671	519.77	0.226278	0.122272	0.0601882	0.0858611	no	no
CG13676	19.4525	0.132612	0.388988	0.691685	0.745327	no	no
CG13685	47.2803	-0.53564	0.320831	0.0630643	0.0893919	no	no
CG13689	95.0636	0.148882	0.222807	0.482086	0.550357	no	no
CG13690	39.3968	-0.284503	0.515565	0.476566	0.544662	no	no
CG13692	4.65159	-0.431863	0.850957	0.360331	0.429932	no	no
CG13704	11.8998	1.40134	1.16303	0.0220759	0.0337055	no	no
CG1371	1958.08	-0.765972	0.103642	7.10567e-14	3.03843e-13	no	no
CG13712	0.106678	0.0378927	1.21977	0.917087	NA	no	no
CG13713	1.29277	-0.211648	0.940354	0.63347	0.692939	no	no
CG13723	0	0	1.62753	NA	NA	no	no
CG13724	0	0	1.62753	NA	NA	no	no
CG13725	0	0	1.62753	NA	NA	no	no
CG13728	0.072818	0	1.21818	1	NA	no	no
CG13737	21.5499	7.13233	1.23684	2.75139e-10	9.18386e-10	yes	yes
CG13742	71.9811	0.514535	0.727647	0.270993	0.334468	no	no
CG13747	0.0939444	0.0378927	1.21977	0.917087	NA	no	no
CG13748	4.77715	0.405676	0.693243	0.373532	0.443515	no	no
CG13751	261.105	-0.487305	0.176341	0.00426293	0.00732933	no	no
CG13759	0.565853	0.185312	1.11332	0.64891	NA	no	no
CG13766	96.0601	-0.192219	0.225979	0.370101	0.440052	no	no
CG13771	26.5276	-7.17208	1.2465	2.97763e-10	9.8875e-10	yes	yes
CG13773	169.476	-0.39418	0.158894	0.010828	0.0174247	no	no
CG13786	0.171371	-0.135045	1.23824	0.713394	NA	no	no
CG13801	0.0939444	0.0378927	1.21977	0.917087	NA	no	no
CG13806	0.0939444	0.0378927	1.21977	0.917087	NA	no	no
CG13807	169.728	-0.779319	0.212148	0.000110034	0.000227455	no	no
CG13810	0.666252	0	1.10834	1	1	no	no
CG13829	1.96423	0.084707	0.96621	0.843937	0.880339	no	no
CG13837	0	0	1.62753	NA	NA	no	no
CG13838	0	0	1.62753	NA	NA	no	no
CG13841	1116	-1.83737	0.118587	3.56398e-55	7.80878e-54	yes	no
CG13843	4.28373	-0.0442145	0.644023	0.919537	0.943285	no	no
CG13856	212.671	1.22265	0.257807	3.55122e-07	9.39965e-07	no	no
CG13857	0	0	1.62753	NA	NA	no	no
CG13862	0.958035	-0.792839	1.38221	0.11955	0.160286	no	no
CG13865	553.589	0.350413	0.108258	0.00104864	0.0019586	no	no
CG13870	1.72889	-0.763827	1.12846	0.137324	0.181974	no	no
CG13872	0.0716119	0	1.21818	1	NA	no	no
CG13875	192.058	1.61303	0.177451	9.48475e-21	5.87299e-20	yes	no
CG13887	4265.53	0.362756	0.0577405	2.88585e-10	9.60765e-10	no	no
CG13891	0.513127	0.131167	1.16069	0.735644	NA	no	no
CG13893	1526.26	0.702004	0.103682	7.05791e-12	2.64324e-11	no	no
CG13895	251.299	-0.553611	0.140824	5.85338e-05	0.000124679	no	no
CG13898	0.244189	-0.135044	1.23824	0.713396	NA	no	no
CG13900	2400.47	0.339335	0.0651269	1.66113e-07	4.52289e-07	no	no
CG13901	163.855	0.142365	0.18976	0.43636	0.505929	no	no
CG13902	168.731	1.41417	0.192355	2.26532e-14	1.0047e-13	yes	no
CG13905	0.0716119	0	1.21818	1	NA	no	no
CG13907	2251.47	0.76899	0.118088	3.56967e-11	1.27805e-10	no	no
CG13912	27.2573	2.81161	0.775448	3.61924e-06	8.74864e-06	yes	yes
CG13917	3823.01	0.878694	0.106174	4.80931e-17	2.45836e-16	no	no
CG13919	152.173	-0.437931	0.183992	0.0135921	0.0215348	no	no
CG13920	75.5559	2.86761	0.449811	2.1198e-12	8.23975e-12	yes	yes
CG13924	12.0348	-0.687859	0.490681	0.0789842	0.109922	no	no
CG13926	184.307	-0.246647	0.149984	0.0923332	0.126881	no	no
CG13931	0.162619	0	1.21818	1	NA	no	no
CG1394	0.425057	0.158563	1.23807	0.669384	NA	no	no
CG13949	9.47262	-0.497647	0.586524	0.247011	0.308771	no	no
CG13955	37.737	-2.75353	1.5091	0.000981123	0.00183853	no	no
CG13957	654.339	0.431419	0.0878088	7.26373e-07	1.87518e-06	no	no
CG13970	0.233025	0	1.21818	1	NA	no	no
CG13983	2.134	1.79886	1.68264	0.0127509	0.0202836	no	no
CG13992	10.169	-0.873886	0.773049	0.0796272	0.110697	no	no
CG13993	1098.06	1.25287	0.171453	4.16523e-14	1.81437e-13	yes	no
CG13994	622.17	-1.77393	0.143436	3.63586e-36	4.53144e-35	yes	no
CG13998	0.072818	0	1.21818	1	NA	no	no
CG14000	0	0	1.62753	NA	NA	no	no
CG14005	192.07	1.20559	0.179842	3.45519e-12	1.32894e-11	no	no
CG14010	178.469	-2.14059	0.167528	1.56945e-38	2.14575e-37	yes	yes
CG14013	0.403375	-0.15126	1.18597	0.693998	NA	no	no
CG14014	0.171371	-0.135045	1.23824	0.713394	NA	no	no
CG1402	2.14236	0.0718371	0.795043	0.873442	0.904559	no	no
CG14020	37.3305	-0.485618	0.317037	0.0890544	0.122836	no	no
CG14022	26.6771	0.308676	0.439312	0.395424	0.465413	no	no
CG14024	15.0158	0.876489	0.528376	0.0337164	0.0501782	no	no
CG14034	7.76673	-0.88731	0.740365	0.0709986	0.0997287	no	no
CG14036	1.39551	0.189234	1.10484	0.643998	0.701909	no	no
CG14040	454.3	-0.606721	0.125655	8.86136e-07	2.26595e-06	no	no
CG14044	106.681	-1.33772	0.206526	1.22849e-11	4.54108e-11	yes	no
CG14050	12.8195	0.821522	0.880883	0.109035	0.147655	no	no
CG14062	0	0	1.62753	NA	NA	no	no
CG14069	74.7979	7.90236	1.42463	1.01593e-09	3.25136e-09	yes	yes
CG14070	1.87518	1.52034	1.59293	0.0224586	0.0342084	no	no
CG14071	0.555379	0.203609	1.24669	0.589296	NA	no	no
CG14072	0.161413	0	1.21818	1	NA	no	no
CG14077	0.823041	0.42233	1.27426	0.319333	0.387233	no	no
CG14089	0.179496	0.0378934	1.21977	0.917086	NA	no	no
CG1409	0	0	1.62753	NA	NA	no	no
CG14102	107.659	-0.703415	0.194137	0.000155752	0.000316755	no	no
CG14106	2.12155	1.51632	1.45903	0.0210391	0.0322666	no	no
CG14107	0.106678	0.0378927	1.21977	0.917087	NA	no	no
CG14110	0.167803	-0.135045	1.23824	0.713394	NA	no	no
CG14131	65.9339	0.0544694	0.24765	0.814927	0.856525	no	no
CG14132	55.5829	-0.196462	0.323384	0.499392	0.565705	no	no
CG14135	128.768	0.0862511	0.190993	0.639296	0.697673	no	no
CG14137	0.223632	0.123037	1.2303	0.73835	NA	no	no
CG14147	0.459997	0.29069	1.20921	0.472413	NA	no	no
CG1416	1144.02	0.0585086	0.135611	0.660229	0.716401	no	no
CG14174	68.4204	-2.14243	0.361061	1.56532e-10	5.33602e-10	yes	yes
CG1418	539.251	-0.164595	0.119501	0.162213	0.211189	no	no
CG14183	184.625	-5.39449	0.30606	7.29111e-71	2.44324e-69	yes	yes
CG14184	674.469	0.14326	0.137056	0.286629	0.351903	no	no
CG14185	7.89206	1.85815	0.993195	0.00301706	0.00529379	no	no
CG14187	2.14124	0.0502551	0.920369	0.908566	0.933697	no	no
CG14194	455.06	0.402054	0.173176	0.016539	0.0258366	no	no
CG14195	0	0	1.62753	NA	NA	no	no
CG14196	146.184	0.932361	0.198908	9.09232e-07	2.31807e-06	no	no
CG14212	2.18568	-1.56623	1.45399	0.0185183	0.0286924	no	no
CG14229	78.8757	-0.950247	0.27153	0.000146081	0.000297679	no	no
CG14231	93.3823	-0.144996	0.248913	0.534941	0.601457	no	no
CG14232	389.03	0.702869	0.117595	1.24597e-09	3.94813e-09	no	no
CG14244	0	0	1.62753	NA	NA	no	no
CG14247	0	0	1.62753	NA	NA	no	no
CG14258	21.6865	-1.22304	0.481512	0.00195973	0.0035441	yes	no
CG14259	14658.2	-1.99061	0.0837147	5.02496e-126	4.15532e-124	yes	no
CG14260	0.684441	0	1.17482	1	1	no	no
CG14269	0.798812	0.282752	1.07731	0.510133	0.576599	no	no
CG1427	635.795	0.438689	0.11942	0.000191187	0.000386063	no	no
CG14270	140.307	0.990133	0.212382	8.95647e-07	2.2879e-06	no	no
CG14273	0.294566	0.164219	1.2396	0.658765	NA	no	no
CG14274	12.0714	0.305231	0.496735	0.435711	0.505405	no	no
CG14275	486.392	-0.602465	0.134644	4.95187e-06	1.1836e-05	no	no
CG14282	8.20855	-5.91261	1.41502	3.49412e-07	9.25806e-07	no	no
CG14291	814.995	-2.11836	0.107322	7.9087e-88	3.62035e-86	yes	yes
CG14292	0.745899	-0.220779	1.02166	0.608388	0.669213	no	no
CG14298	58.6054	1.469	0.372412	8.85837e-06	2.05066e-05	yes	no
CG14300	0	0	1.62753	NA	NA	no	no
CG14305	0.555215	-0.36524	1.17735	0.392499	NA	no	no
CG14309	23.586	0.620909	1.41247	0.176913	0.228357	no	no
CG14312	3.63278	0.000959923	0.709547	0.998288	1	no	no
CG14317	0.14443	0	1.21818	1	NA	no	no
CG14321	26.1807	-4.18035	0.619593	1.31476e-13	5.4982e-13	yes	yes
CG14323	0	0	1.62753	NA	NA	no	no
CG14326	0.106678	0.0378927	1.21977	0.917087	NA	no	no
CG14327	0	0	1.62753	NA	NA	no	no
CG14329	2.12187	-0.124454	0.925458	0.777142	0.823394	no	no
CG14330	0	0	1.62753	NA	NA	no	no
CG14331	11.8979	-5.74111	1.42404	5.79861e-07	1.51141e-06	yes	yes
CG14342	1.41928	-0.915405	1.24745	0.0906586	0.124847	no	no
CG14346	0	0	1.62753	NA	NA	no	no
CG14352	74.8745	-0.283751	0.259384	0.241007	0.302021	no	no
CG14353	112.055	0.619049	0.220621	0.00307044	0.00538562	no	no
CG14362	0.0716119	0	1.21818	1	NA	no	no
CG14367	260.937	-0.575213	0.149058	7.63131e-05	0.000160483	no	no
CG14369	0	0	1.62753	NA	NA	no	no
CG14380	0.072818	0	1.21818	1	NA	no	no
CG14383	0	0	1.62753	NA	NA	no	no
CG14391	0.354102	-0.149571	1.21063	0.692023	NA	no	no
CG14397	0.0898009	0	1.21818	1	NA	no	no
CG1440	3073.6	0.262217	0.0625919	2.59464e-05	5.78127e-05	no	no
CG14400	21.971	1.9625	0.697288	0.000227309	0.000455239	no	no
CG14402	0.660979	-0.36951	1.08994	0.403495	0.473499	no	no
CG14407	420.347	0.606153	0.141641	1.20174e-05	2.75675e-05	no	no
CG1441	2490.56	-2.05228	0.0857289	1.02618e-127	8.62498e-126	yes	yes
CG14417	4.35811	0	0.915499	1	1	no	no
CG14427	0	0	1.62753	NA	NA	no	no
CG1444	6775.44	1.00702	0.0942039	3.10713e-27	2.65504e-26	no	no
CG14441	1327.77	0.780897	0.124407	1.61911e-10	5.50843e-10	no	no
CG14448	0.618241	0.0613628	1.06994	0.879844	NA	no	no
CG14450	387.336	-1.02502	0.133594	4.4063e-15	2.01943e-14	yes	no
CG14455	0	0	1.62753	NA	NA	no	no
CG14464	618.82	0.305926	0.173371	0.0686413	0.0967356	no	no
CG14476	15183.7	-0.00614132	0.0769201	0.935981	0.957266	no	no
CG14478	892.637	0.66822	0.0977397	4.75052e-12	1.80816e-11	no	no
CG14480	469.175	-0.042888	0.139749	0.754241	0.803203	no	no
CG14482	633.699	-1.07344	0.232154	8.83942e-07	2.26216e-06	yes	no
CG14483	293.488	-0.264453	0.171936	0.112751	0.152084	no	no
CG14490	3.35864	0.547123	0.845779	0.257234	0.319409	no	no
CG14491	0.447264	0.223625	1.26018	0.553798	NA	no	no
CG14492	0	0	1.62753	NA	NA	no	no
CG14500	1.87451	0.611053	1.12234	0.208267	0.263911	no	no
CG14502	2.41129	-1.21184	1.17622	0.0393142	0.0578707	no	no
CG14505	5.62094	0.402339	0.675789	0.373672	0.443579	no	no
CG14507	2.92829	0.0151605	0.73907	0.973106	0.988923	no	no
CG14508	28.5289	4.79565	1.41216	4.43351e-06	1.06457e-05	no	no
CG14512	161.212	-0.786125	0.182249	7.34957e-06	1.7159e-05	no	no
CG14515	174.348	-0.396992	0.693041	0.383424	0.45337	no	no
CG14523	101.422	1.20363	0.220076	7.82282e-09	2.34822e-08	no	no
CG14535	46.5721	0.76609	0.297703	0.00462856	0.00792077	no	no
CG14537	0.273546	0.0378942	1.21977	0.917084	NA	no	no
CG14543	119.996	-1.25565	0.250599	8.49557e-08	2.35697e-07	yes	no
CG14544	32.8387	0.0632714	0.336374	0.833038	0.872074	no	no
CG14551	0.165556	0.0378934	1.21977	0.917086	NA	no	no
CG14561	18.6093	-0.624135	0.467176	0.0995966	0.135879	no	no
CG14564	0	0	1.62753	NA	NA	no	no
CG14565	0.273546	0.0378942	1.21977	0.917084	NA	no	no
CG14566	1.22668	0.237229	1.03681	0.581268	0.643802	no	no
CG14567	1298.36	0.662683	0.160066	2.02058e-05	4.55564e-05	no	no
CG14568	1.54136	0.924277	1.29327	0.0883644	0.12195	no	no
CG14569	0	0	1.62753	NA	NA	no	no
CG14570	0.0716119	0	1.21818	1	NA	no	no
CG14572	4.73075	0.451573	0.80805	0.339185	0.408024	no	no
CG14573	0.072818	0	1.21818	1	NA	no	no
CG14579	0	0	1.62753	NA	NA	no	no
CG14589	7.22247	0.591268	0.771765	0.217274	0.274443	no	no
CG14590	121.947	3.0529	0.266731	1.65433e-32	1.82011e-31	yes	yes
CG14598	2.53537	-2.8067	1.95301	0.00218589	0.0039213	no	no
CG14607	0.977688	-0.00281505	0.954684	0.994785	1	no	no
CG1461	1380.23	1.31388	0.329032	9.35645e-06	2.16084e-05	yes	no
CG14613	270.928	0.577748	0.125865	2.97703e-06	7.2475e-06	no	no
CG14618	315.529	0.0873108	0.118624	0.455267	0.523471	no	no
CG14624	0	0	1.62753	NA	NA	no	no
CG14626	93.7147	-4.3323	0.55839	1.00378e-16	5.02576e-16	yes	yes
CG14627	2.42022	-0.30252	1.01813	0.494161	0.561019	no	no
CG14629	451.88	2.9696	0.436899	9.93721e-14	4.19671e-13	yes	yes
CG1463	64.7225	-0.879724	0.288038	0.000825003	0.00155621	no	no
CG14636	539.229	-0.994328	0.0992907	3.72617e-24	2.7607e-23	no	no
CG14644	0.553942	0.364098	1.20951	0.387276	NA	no	no
CG14645	0.955144	-0.386362	1.14883	0.376007	0.445937	no	no
CG14646	817.253	-0.31585	0.0835399	0.00013974	0.000285096	no	no
CG14650	1322.86	0.28917	0.0775253	0.000174392	0.000353124	no	no
CG14651	0.630221	-0.371009	1.23003	0.375914	NA	no	no
CG14657	523.278	-1.69265	0.097732	3.24795e-68	1.04731e-66	yes	no
CG14659	0	0	1.62753	NA	NA	no	no
CG14664	0.411992	-0.275945	1.23409	0.485626	NA	no	no
CG14667	254.522	-0.172143	0.138809	0.205908	0.261374	no	no
CG14671	347.636	-0.619647	0.133623	2.22315e-06	5.48249e-06	no	no
CG14676	11.7634	-4.73178	1.53466	1.20615e-05	2.76438e-05	yes	yes
CG14684	0	0	1.62753	NA	NA	no	no
CG14687	878.075	0.594444	0.1574	0.000103304	0.000214081	no	no
CG14695	105.366	2.33101	0.245724	1.11725e-22	7.61719e-22	yes	yes
CG14701	67.0316	0.00368612	0.299836	0.989258	1	no	no
CG14708	0	0	1.62753	NA	NA	no	no
CG14710	174.841	-0.565602	0.182951	0.00133794	0.00247105	no	no
CG14715	156.194	-1.0749	0.194695	7.83553e-09	2.35066e-08	yes	no
CG14720	0.324032	0	1.19566	1	NA	no	no
CG14722	433.768	0.0437923	0.140527	0.75052	0.799816	no	no
CG14731	0	0	1.62753	NA	NA	no	no
CG14749	337.915	-0.316908	0.136471	0.0178885	0.027767	no	no
CG14752	0.904058	0.0574171	1.09107	0.885995	0.914904	no	no
CG14757	382.883	0.415693	0.114838	0.00024127	0.000482071	no	no
CG14759	0	0	1.62753	NA	NA	no	no
CG14760	0.171371	-0.135045	1.23824	0.713394	NA	no	no
CG14767	4311.07	0.459608	0.0696271	3.22534e-11	1.15719e-10	no	no
CG14770	8.4483	-0.390206	0.949621	0.399454	0.469295	no	no
CG14780	0.792493	0	1.07299	1	1	no	no
CG14795	13.7403	1.12947	1.07859	0.0468493	0.0680057	no	no
CG14803	270.718	0.509053	0.140934	0.000222996	0.000447125	no	no
CG14805	595.964	-0.971464	0.128143	1.02649e-14	4.63684e-14	no	no
CG14806	408.764	-0.625486	0.164342	8.72901e-05	0.000182519	no	no
CG14812	202.774	0.911711	0.168837	2.30762e-08	6.66544e-08	no	no
CG14814	107.68	-0.377547	0.402139	0.269806	0.333244	no	no
CG14817	171.365	-0.560467	0.169398	0.000637569	0.00121744	no	no
CG14818	775.6	0.694139	0.137101	2.28778e-07	6.16366e-07	no	no
CG14820	0.936516	0.670882	1.25326	0.169921	0.220275	no	no
CG14823	29.7979	2.28054	0.814989	0.000136856	0.000279657	yes	yes
CG14826	0.200622	0.110335	1.22834	0.763887	NA	no	no
CG14829	0.480802	-0.294389	1.29229	0.446176	NA	no	no
CG14830	3241.14	0.302682	0.11212	0.0062315	0.0104272	no	no
CG14837	165.226	-0.836857	0.182334	1.82099e-06	4.52775e-06	no	no
CG14839	0	0	1.62753	NA	NA	no	no
CG14851	0.252314	0.037894	1.21977	0.917084	NA	no	no
CG14853	53.3336	-0.649146	0.296076	0.016045	0.0251107	no	no
CG14854	498.756	2.197	0.136156	9.71613e-60	2.46607e-58	yes	no
CG14855	18.2176	-0.998416	0.516671	0.0147038	0.0232044	no	no
CG14857	11.0853	-0.0297164	0.536051	0.941736	0.962192	no	no
CG1486	2453.02	2.06358	0.0835173	7.37185e-136	7.13122e-134	yes	no
CG14860	30.5012	-1.48676	0.370601	6.49511e-06	1.52965e-05	yes	no
CG14870	26.9674	1.50165	0.519873	0.000407749	0.000797912	yes	no
CG14879	93.7738	-0.130832	0.224426	0.539424	0.605349	no	no
CG14905	3.54221	-1.71713	1.29233	0.0103084	0.0166408	no	no
CG14915	0	0	1.62753	NA	NA	no	no
CG1492	60.8339	-1.85433	0.306704	1.12037e-10	3.84997e-10	yes	no
CG14921	1.35406	0.340062	0.920146	0.459387	0.527379	no	no
CG14931	8.52936	0.416784	1.06222	0.359403	0.429224	no	no
CG1494	3.46613	0	0.928427	1	1	no	no
CG14945	392.861	-3.22002	0.131105	1.45684e-135	1.38319e-133	yes	yes
CG14946	13014.4	-2.4522	0.0925188	3.28583e-156	3.82873e-154	yes	yes
CG14958	0	0	1.62753	NA	NA	no	no
CG14968	47.458	0.0271486	0.266173	0.912734	0.937042	no	no
CG14969	575.095	-0.890319	0.106124	1.79352e-17	9.3354e-17	no	no
CG14971	606.613	0.78865	0.0917026	3.69838e-18	1.99386e-17	no	no
CG14985	354.325	-0.776242	0.14321	2.80553e-08	8.04023e-08	no	no
CG15012	901.605	0.250961	0.119083	0.0324639	0.0484315	no	no
CG15014	239.451	-1.25843	0.143734	3.04917e-19	1.73894e-18	yes	no
CG15019	429.574	-2.69927	0.18421	2.23746e-50	4.11164e-49	yes	yes
CG15024	0.309431	-0.219563	1.26602	0.558471	NA	no	no
CG15027	198.668	0.260046	0.174992	0.125047	0.166783	no	no
CG15034	0.524822	0.0474339	1.15118	0.901741	NA	no	no
CG15035	1.80758	0.085446	0.963374	0.842807	0.879697	no	no
CG15036	1566.05	0.632336	0.298859	0.0199628	0.0307447	no	no
CG1504	2.41325	-0.925318	1.06075	0.0861494	0.119246	no	no
CG15044	7.86637	2.21171	0.956074	0.00058681	0.00112428	no	no
CG15073	263.48	-1.46416	0.168401	3.77263e-19	2.13963e-18	yes	no
CG15080	14.8999	3.91028	1.10709	2.59372e-06	6.35357e-06	no	no
CG15082	147.834	0.0864809	0.177617	0.615107	0.675735	no	no
CG15083	1902.71	-0.0676458	0.105743	0.517604	0.584013	no	no
CG15084	107.467	-0.298707	0.223383	0.159067	0.207646	no	no
CG15087	733.775	-0.53389	0.116752	3.44437e-06	8.3456e-06	no	no
CG15093	712.66	0.422778	0.112854	0.000145967	0.000297563	no	no
CG15096	1582.62	-0.886851	0.119733	4.77717e-14	2.07038e-13	no	no
CG15097	46.8347	0.126322	0.293975	0.639025	0.697527	no	no
CG15098	11874.7	1.10714	0.0614656	3.27019e-73	1.13286e-71	no	no
CG15099	4665.57	0.268675	0.0684002	7.90864e-05	0.000165907	no	no
CG15100	683.466	-0.408891	0.140448	0.00294626	0.005183	no	no
CG15109	1.4061	0.429846	1.10082	0.341817	0.410613	no	no
CG15111	1263.28	0.654401	0.0709843	1.81104e-20	1.10145e-19	no	no
CG15115	0.13806	-0.135045	1.23824	0.713394	NA	no	no
CG15116	0.072818	0	1.21818	1	NA	no	no
CG15117	420.245	0.831598	0.158754	6.75999e-08	1.89184e-07	no	no
CG15120	76.5899	0.453843	0.257721	0.0589113	0.084227	no	no
CG15125	0	0	1.62753	NA	NA	no	no
CG15127	0	0	1.62753	NA	NA	no	no
CG15128	2.37491	-0.112169	0.750728	0.803789	0.846728	no	no
CG15130	12.043	-0.268776	0.44112	0.460455	0.528487	no	no
CG15136	0.269403	0	1.21818	1	NA	no	no
CG15141	233.221	-0.614823	0.135286	3.49063e-06	8.4497e-06	no	no
CG15142	0.307049	0	1.20147	1	NA	no	no
CG15147	0.171371	-0.135045	1.23824	0.713394	NA	no	no
CG15152	0.14443	0	1.21818	1	NA	no	no
CG15153	0	0	1.62753	NA	NA	no	no
CG15155	6.19816	2.74977	1.43005	0.000777728	0.00147191	no	no
CG1516	13741.2	0.267871	0.068568	8.64387e-05	0.000180812	no	no
CG15161	95.8185	-0.156777	0.209425	0.433667	0.503718	no	no
CG15167	0	0	1.62753	NA	NA	no	no
CG15168	1139.02	-1.92958	0.13028	1.11542e-50	2.08714e-49	yes	no
CG1518	2188.7	0.108928	0.0704993	0.120434	0.161344	no	no
CG15198	0.13806	-0.135045	1.23824	0.713394	NA	no	no
CG15201	2286.87	7.37062	0.257128	6.54897e-182	1.01747e-179	yes	yes
CG15202	487.659	1.64882	0.153031	4.32423e-28	3.84234e-27	yes	no
CG15208	1.38315	0.0666807	0.955075	0.877259	0.907345	no	no
CG15209	113.329	2.30718	0.228063	2.3398e-25	1.81211e-24	yes	yes
CG15210	21.9711	1.94424	0.526257	1.1917e-05	2.73617e-05	yes	no
CG15211	774.841	1.09001	0.159731	1.96892e-12	7.67072e-12	no	no
CG15213	18.3378	6.89556	1.27028	1.64916e-09	5.18726e-09	yes	yes
CG15219	0.417976	0.0535328	1.11323	0.892088	NA	no	no
CG15221	0.872388	-0.232657	1.09324	0.578061	0.641081	no	no
CG15227	0	0	1.62753	NA	NA	no	no
CG15247	67.7461	4.3746	0.546356	1.49722e-17	7.84089e-17	yes	yes
CG15249	25.4623	-7.12119	1.24462	3.53452e-10	1.16837e-09	yes	yes
CG15255	0.936068	0.709182	1.2013	0.156622	0.204773	no	no
CG15258	0	0	1.62753	NA	NA	no	no
CG15262	0.072818	0	1.21818	1	NA	no	no
CG15263	0	0	1.62753	NA	NA	no	no
CG15269	3.86628	-0.126608	0.914268	0.774326	0.821259	no	no
CG15279	1094.1	1.00646	0.187938	2.34661e-08	6.77045e-08	no	no
CG15283	0	0	1.62753	NA	NA	no	no
CG15296	0.920403	0.0675225	1.0394	0.870304	0.903066	no	no
CG15309	116.805	0.315878	0.227394	0.142704	0.188471	no	no
CG15317	66.2769	1.09098	0.257096	4.97694e-06	1.18904e-05	no	no
CG1532	2484.92	1.95962	0.0863177	3.88777e-115	2.84751e-113	yes	no
CG15322	21.3069	0.274898	0.664704	0.537384	0.603806	no	no
CG15330	0	0	1.62753	NA	NA	no	no
CG15337	13.2653	-2.49616	1.08829	0.000405873	0.000794544	no	no
CG15347	176.437	2.57664	0.197677	1.98821e-40	2.81591e-39	yes	yes
CG15357	0	0	1.62753	NA	NA	no	no
CG15358	0.167803	-0.135045	1.23824	0.713394	NA	no	no
CG15369	30.3829	6.70783	1.25679	2.53563e-09	7.86936e-09	yes	yes
CG15370	1.69822	-0.315955	0.898196	0.491157	0.558503	no	no
CG15373	1.25607	0	1.10409	1	1	no	no
CG15387	33.9818	-1.02099	0.334037	0.00059843	0.00114569	yes	no
CG15390	87.957	-1.45803	0.249383	5.54336e-10	1.8114e-09	yes	no
CG15394	1064.76	-1.9133	0.100617	1.17127e-81	4.61932e-80	yes	no
CG15395	0.223632	0.123037	1.2303	0.73835	NA	no	no
CG15398	0	0	1.62753	NA	NA	no	no
CG15399	3.07907	-0.122861	0.924209	0.779976	0.825714	no	no
CG15403	0	0	1.62753	NA	NA	no	no
CG15404	0	0	1.62753	NA	NA	no	no
CG15414	4.05598	-0.172198	0.684203	0.699709	0.752708	no	no
CG1542	191.087	-0.0565891	0.168107	0.729006	0.779482	no	no
CG15422	1.02672	0	1.04101	1	1	no	no
CG15423	5.2852	0	0.926803	1	1	no	no
CG15425	0.267747	-0.0479265	1.22073	0.8953	NA	no	no
CG15429	0.0716119	0	1.21818	1	NA	no	no
CG15432	133.285	-0.126992	0.197677	0.503776	0.570168	no	no
CG15434	0.336927	-0.0522322	1.19495	0.888363	NA	no	no
CG15435	119.5	-0.524992	0.212209	0.00938826	0.0152999	no	no
CG15439	325.749	0.700532	0.115987	8.50272e-10	2.73656e-09	no	no
CG15440	361.538	0.202819	0.139404	0.137729	0.182417	no	no
CG15445	913.001	0.637712	0.0894331	6.1809e-13	2.46611e-12	no	no
CG15450	0	0	1.62753	NA	NA	no	no
CG15452	0	0	1.62753	NA	NA	no	no
CG15458	0.0716119	0	1.21818	1	NA	no	no
CG15461	1.90963	-0.836045	1.14974	0.112487	0.151857	no	no
CG15471	0	0	1.62753	NA	NA	no	no
CG15475	0.387413	-0.155409	1.20018	0.683572	NA	no	no
CG15479	4.59022	-0.146504	0.859384	0.744457	0.794181	no	no
CG15480	0.382638	-0.135043	1.23824	0.713398	NA	no	no
CG15483	0	0	1.62753	NA	NA	no	no
CG15485	0.0898009	0	1.21818	1	NA	no	no
CG15497	37.9758	-1.16923	1.14853	0.0437041	0.0637834	no	no
CG1550	588.656	0.143127	0.0900236	0.108907	0.14752	no	no
CG15506	150.969	1.68766	0.213121	2.17317e-16	1.06825e-15	yes	no
CG15515	3.14771	-1.47627	1.38292	0.022057	0.0336947	no	no
CG1552	3.16303	-1.46442	1.15599	0.0180077	0.0279435	no	no
CG15522	21.4934	0.0511854	0.377241	0.875675	0.906255	no	no
CG15525	129.512	-0.855127	0.201789	8.8594e-06	2.05066e-05	no	no
CG15536	57.0476	0.438602	0.302508	0.110811	0.149823	no	no
CG15537	8.65353	-2.24471	0.817711	0.000169993	0.000344623	no	no
CG15543	0	0	1.62753	NA	NA	no	no
CG15545	16.2909	0.108734	0.883042	0.807001	0.849414	no	no
CG15548	0.0939444	0.0378927	1.21977	0.917087	NA	no	no
CG15549	0	0	1.62753	NA	NA	no	no
CG15550	0.483133	0.268636	1.20257	0.503214	NA	no	no
CG15554	12.322	0	0.880248	1	1	no	no
CG15556	2215.99	0.36981	0.0726809	3.10814e-07	8.26955e-07	no	no
CG15561	143.606	-0.154029	0.182792	0.383236	0.453357	no	no
CG15571	0.238374	0.037894	1.21977	0.917084	NA	no	no
CG15576	0	0	1.62753	NA	NA	no	no
CG15577	0.232004	-0.0479265	1.22073	0.8953	NA	no	no
CG15579	0.722088	0	1.09495	1	1	no	no
CG15594	1.26222	0	1.02477	1	1	no	no
CG15602	389.867	-0.721006	0.15338	1.36028e-06	3.42375e-06	no	no
CG15605	0	0	1.62753	NA	NA	no	no
CG15614	2.64004	0.734621	0.944895	0.148367	0.195016	no	no
CG15615	1.26462	0.533256	1.04637	0.263408	0.326285	no	no
CG15617	0.754689	0.455248	1.22721	0.300857	0.367435	no	no
CG15618	217.595	0.380745	0.174523	0.0242567	0.0368268	no	no
CG15625	3.20202	-1.22004	1.14762	0.0375757	0.0554709	no	no
CG15628	336.736	-0.103958	0.123408	0.392228	0.461969	no	no
CG15629	30.5339	-0.30279	0.397595	0.372426	0.442406	no	no
CG15638	0.422585	-0.159051	1.19384	0.67834	NA	no	no
CG15641	0	0	1.62753	NA	NA	no	no
CG15642	20.4625	2.43998	0.643486	3.47177e-06	8.40801e-06	yes	yes
CG15643	49.2085	0.786949	0.311391	0.00505283	0.00858948	no	no
CG15649	0.965689	0.0428303	0.939323	0.921397	0.944989	no	no
CG15651	58.971	0.339419	0.258178	0.158889	0.207494	no	no
CG15653	38.3215	-1.62221	0.367269	8.96508e-07	2.2879e-06	yes	no
CG15657	0	0	1.62753	NA	NA	no	no
CG15673	1610.26	1.13558	0.127986	1.40982e-19	8.16742e-19	no	no
CG15696	3.58266	0	0.924346	1	1	no	no
CG15704	0	0	1.62753	NA	NA	no	no
CG15706	291.353	-2.03179	0.144876	9.16535e-46	1.4777e-44	yes	yes
CG1571	1.36185	0.446917	1.03565	0.334468	0.402918	no	no
CG15710	0	0	1.62753	NA	NA	no	no
CG15711	0	0	1.62753	NA	NA	no	no
CG15712	0	0	1.62753	NA	NA	no	no
CG15715	522.337	-0.898096	0.146483	3.12972e-10	1.03791e-09	no	no
CG15717	177.985	0.338367	0.221089	0.10728	0.14547	no	no
CG15719	0	0	1.62753	NA	NA	no	no
CG1572	1717.27	-0.341851	0.11747	0.00314978	0.00550971	no	no
CG15728	0.167803	-0.135045	1.23824	0.713394	NA	no	no
CG15734	5.46248	0	0.906183	1	1	no	no
CG15735	998.18	-0.749455	0.0885038	1.25786e-17	6.61441e-17	no	no
CG15739	23.4205	0.214648	0.459764	0.565708	0.62915	no	no
CG15743	537.161	1.10678	0.14203	1.39604e-15	6.57857e-15	no	no
CG15747	233.433	1.0033	0.16208	1.66247e-10	5.64468e-10	no	no
CG15754	0	0	1.62753	NA	NA	no	no
CG15756	0	0	1.62753	NA	NA	no	no
CG15766	50.4542	5.62006	0.78692	2.85612e-14	1.25478e-13	yes	yes
CG15771	1817.51	-1.87575	0.102875	2.62808e-75	9.48884e-74	yes	no
CG15772	39.1384	2.5908	0.434899	5.50119e-11	1.93846e-10	yes	yes
CG15773	3.67412	0.953066	0.981765	0.0760992	0.10634	no	no
CG15800	0.593127	-0.384028	1.23849	0.361271	NA	no	no
CG15814	757.036	0.570648	0.0936509	7.57055e-10	2.4566e-09	no	no
CG1582	1531.54	0.59194	0.0850946	2.32389e-12	8.97858e-12	no	no
CG15824	9.21005	1.36828	1.15184	0.0241056	0.0366082	no	no
CG15829	11.4009	-0.0105139	0.484467	0.978226	0.993338	no	no
CG15863	91.8744	-1.49482	0.24497	1.10272e-10	3.79185e-10	yes	no
CG15864	21.4594	-1.74631	0.727188	0.00106892	0.00199502	no	no
CG15865	0.072818	0	1.21818	1	NA	no	no
CG15873	0.187889	0.103054	1.22735	0.778727	NA	no	no
CG15876	0	0	1.62753	NA	NA	no	no
CG15877	190.282	-0.917773	0.182932	1.78795e-07	4.84503e-07	no	no
CG15878	0.890187	-0.614224	1.25541	0.196246	0.2501	no	no
CG15890	6755.05	-0.604596	0.112013	4.38097e-08	1.23958e-07	no	no
CG15891	361.434	2.2506	0.206588	7.04967e-29	6.48932e-28	yes	yes
CG15892	16.2552	4.29747	1.47406	2.07547e-05	4.67733e-05	yes	yes
CG15896	118.87	1.25256	0.203137	1.08366e-10	3.73634e-10	yes	no
CG15905	0	0	1.62753	NA	NA	no	no
CG15912	61.5175	-0.548418	0.246864	0.0176848	0.0275007	no	no
CG15914	108.644	-1.03423	0.199665	5.70276e-08	1.59858e-07	yes	no
CG15923	215.615	-1.68901	0.173419	1.89839e-23	1.34807e-22	yes	no
CG15925	0	0	1.62753	NA	NA	no	no
CG15927	1.55547	1.45616	1.4369	0.0240816	0.036591	no	no
CG1597	955.32	0.605008	0.0945139	1.0028e-10	3.46452e-10	no	no
CG1602	205.504	-1.2383	0.1523	6.68985e-17	3.38922e-16	yes	no
CG1603	306.258	-0.42506	0.149776	0.0036496	0.00634073	no	no
CG1607	2477.29	0.38002	0.0957524	6.13191e-05	0.000130287	no	no
CG1620	894.555	0.194368	0.0821031	0.0171329	0.0266586	no	no
CG1636	650.454	-0.871457	0.102262	6.03575e-18	3.21677e-17	no	no
CG1640	3421.44	1.08483	0.083368	2.31412e-39	3.21531e-38	no	no
CG1648	5549.71	1.43526	0.117433	2.63981e-35	3.1996e-34	yes	no
CG1662	391.943	1.48137	0.141757	1.55261e-26	1.27978e-25	yes	no
CG1665	728.577	-0.373302	0.0991205	0.000141434	0.000288437	no	no
CG1667	346.523	-2.50792	0.135332	3.69603e-78	1.39335e-76	yes	yes
CG16704	92.955	5.03918	0.431139	5.31247e-33	5.97303e-32	yes	yes
CG1671	421.368	0.259431	0.12232	0.0312315	0.0467243	no	no
CG16712	6387.25	-0.217581	0.11108	0.04727	0.0685776	no	no
CG16713	3102.92	-1.31117	0.120455	1.81992e-28	1.63985e-27	yes	no
CG16716	0.338133	-0.0523122	1.19449	0.888234	NA	no	no
CG16717	178.027	-0.947657	0.187197	1.31303e-07	3.59994e-07	no	no
CG16719	0	0	1.62753	NA	NA	no	no
CG16721	1411.51	0.645998	0.120743	5.32085e-08	1.49941e-07	no	no
CG1673	196.127	3.72629	0.285366	3.11172e-41	4.45637e-40	yes	yes
CG16734	252.246	-0.483375	0.129121	0.000137736	0.000281344	no	no
CG16736	10.0605	-0.525147	0.538272	0.202135	0.256967	no	no
CG16739	1.74104	-0.58143	0.958698	0.233965	0.293789	no	no
CG16741	0	0	1.62753	NA	NA	no	no
CG16743	78.6237	1.29828	0.374074	7.77872e-05	0.000163382	no	no
CG16749	15.9486	-2.62236	0.652492	1.01068e-06	2.56268e-06	yes	yes
CG16753	56.8174	-1.18332	0.306967	2.15352e-05	4.84047e-05	yes	no
CG16762	84.7851	1.957	1.10447	0.00311564	0.00545556	no	no
CG16771	263.176	-0.609628	0.120866	2.92915e-07	7.81361e-07	no	no
CG16782	6.9411	-1.00553	1.09287	0.0687416	0.0968502	no	no
CG16787	158.251	-0.660836	0.162813	2.87633e-05	6.36666e-05	no	no
CG16790	118.177	0.0549527	0.294909	0.838761	0.876544	no	no
CG16800	0	0	1.62753	NA	NA	no	no
CG16812	371.899	0.208036	0.113153	0.0624675	0.0886512	no	no
CG16826	4.61107	0.071216	0.853835	0.873471	0.904559	no	no
CG16833	818.046	-1.06156	0.0958479	3.91404e-29	3.65525e-28	yes	no
CG16836	196.651	-1.45997	0.533564	0.000703433	0.00133673	yes	no
CG16837	0	0	1.62753	NA	NA	no	no
CG16854	0	0	1.62753	NA	NA	no	no
CG16865	136.381	-1.75882	0.208895	3.32698e-18	1.79784e-17	yes	no
CG1688	50.419	0.266858	0.303678	0.334262	0.402764	no	no
CG16890	157.383	-0.829564	0.181174	1.94968e-06	4.82433e-06	no	no
CG16892	153.593	-0.0514801	0.178356	0.765604	0.813692	no	no
CG16894	0	0	1.62753	NA	NA	no	no
CG16896	279.912	-1.03423	0.137669	1.48168e-14	6.62879e-14	yes	no
CG16898	160.157	-9.04361	1.0154	3.30154e-20	1.97055e-19	yes	yes
CG1690	0	0	1.62753	NA	NA	no	no
CG16926	154.484	1.4711	0.403777	2.98192e-05	6.58127e-05	no	no
CG16935	1380.69	0.13728	0.0834496	0.0975543	0.133376	no	no
CG16947	305.741	-2.4646	0.147041	1.70615e-64	5.02727e-63	yes	yes
CG16952	1054.18	1.03941	0.0925547	7.27722e-30	7.00006e-29	no	no
CG16956	0.430603	0.138835	1.18353	0.717288	NA	no	no
CG16957	0	0	1.62753	NA	NA	no	no
CG16959	578.163	1.53928	0.182106	2.86585e-18	1.55648e-17	yes	no
CG16974	4481.67	-0.31214	0.0699334	7.24567e-06	1.69443e-05	no	no
CG16979	879.502	0.254954	0.0882793	0.00359706	0.00625793	no	no
CG1698	263.975	2.72986	0.293607	2.29141e-22	1.5377e-21	yes	yes
CG16985	366.667	-0.85624	0.177715	5.70085e-07	1.48669e-06	no	no
CG16986	339.249	-0.747602	0.124513	9.65329e-10	3.09521e-09	no	no
CG16995	0.13806	-0.135045	1.23824	0.713394	NA	no	no
CG17003	0.0939444	0.0378927	1.21977	0.917087	NA	no	no
CG17005	5.92304	4.70833	1.6143	1.99917e-05	4.50936e-05	no	no
CG17010	0.636955	0.169769	1.09036	0.679023	0.734152	no	no
CG1703	1736.24	-0.249714	0.0911613	0.005728	0.00965399	no	no
CG17036	66.209	-1.38966	0.278218	7.25995e-08	2.02512e-07	yes	no
CG17047	5.4075	0.954011	1.04719	0.0786335	0.109493	no	no
CG17048	0	0	1.62753	NA	NA	no	no
CG17059	260.566	-0.66202	0.239983	0.00328803	0.00573783	no	no
CG17065	348.879	0.984166	0.157872	1.31939e-10	4.5157e-10	no	no
CG1707	784.596	-0.258741	0.0898916	0.00370052	0.00641833	no	no
CG17075	155.402	0.0788531	0.163448	0.620077	0.680465	no	no
CG17083	0	0	1.62753	NA	NA	no	no
CG17119	593.277	-0.956388	0.132575	1.69093e-13	7.01975e-13	no	no
CG17121	763.153	-0.53726	0.108014	4.68462e-07	1.2298e-06	no	no
CG17122	27.6583	0.238103	0.364919	0.455594	0.523612	no	no
CG17124	122.42	1.44379	0.229202	3.35655e-11	1.20259e-10	yes	no
CG17127	1188.98	3.02357	0.379107	1.20687e-17	6.35281e-17	yes	yes
CG17154	0.922536	-0.67425	1.34021	0.162187	0.211189	no	no
CG17163	100.712	0.844537	0.196952	7.24769e-06	1.69443e-05	no	no
CG17168	568.706	-0.0787523	0.104056	0.444138	0.513206	no	no
CG17180	145.005	-0.365217	0.164043	0.021994	0.0336105	no	no
CG17186	93.3936	-0.958182	0.224614	6.14455e-06	1.45109e-05	no	no
CG17187	89.7597	-0.10563	0.244944	0.646679	0.704382	no	no
CG17190	438.506	-0.640594	0.113199	9.32044e-09	2.78148e-08	no	no
CG17193	0.892793	-0.801019	1.34073	0.11893	0.15958	no	no
CG17199	0	0	1.62753	NA	NA	no	no
CG17202	286.39	-1.09456	0.151372	1.05389e-13	4.4435e-13	yes	no
CG17209	575.783	-0.0441151	0.115795	0.699341	0.75247	no	no
CG1722	36.3173	-0.923468	0.560435	0.0312655	0.0467615	no	no
CG17230	148.107	-0.696513	0.20751	0.000425995	0.000830887	no	no
CG17237	0.664848	0.246184	1.03745	0.568062	0.631358	no	no
CG17242	0.167803	-0.135045	1.23824	0.713394	NA	no	no
CG17244	55.6075	1.84477	0.418695	7.11572e-07	1.83882e-06	yes	no
CG17249	309.483	-0.304748	0.135482	0.0218519	0.0334033	no	no
CG17258	11.6485	-1.39024	0.630619	0.00348854	0.00608152	no	no
CG17259	1434.14	0.526586	0.0771294	6.30781e-12	2.37272e-11	no	no
CG17264	427.737	0.296544	0.835647	0.519728	0.586023	no	no
CG17266	67.9933	-1.86016	0.264899	1.72784e-13	7.16138e-13	yes	no
CG17272	654.651	-1.43289	0.125189	2.75323e-31	2.81191e-30	yes	no
CG17283	0.179496	0.0378934	1.21977	0.917086	NA	no	no
CG17287	0	0	1.62753	NA	NA	no	no
CG17294	236.205	-0.71478	0.147845	7.09475e-07	1.83433e-06	no	no
CG17300	0	0	1.62753	NA	NA	no	no
CG17321	69.6934	0.193831	0.273904	0.444898	0.513853	no	no
CG17325	628.762	0.463509	0.368202	0.148533	0.195164	no	no
CG17327	213.272	-0.909781	0.17221	4.41884e-08	1.24961e-07	no	no
CG17328	108.383	-1.11087	0.1982	4.44234e-09	1.34689e-08	yes	no
CG17329	2.76173	-0.554037	1.03639	0.249427	0.311222	no	no
CG17349	0.232004	-0.0479265	1.22073	0.8953	NA	no	no
CG17350	5095.59	-0.119041	0.0879696	0.172586	0.22339	no	no
CG1737	1165.62	0.812622	0.0863988	2.28384e-21	1.44917e-20	no	no
CG17378	104	-0.351728	0.208068	0.0769164	0.107335	no	no
CG1738	50.6579	-0.747623	0.321364	0.00943845	0.0153622	no	no
CG17385	658.912	0.258319	0.0959362	0.00655841	0.0109385	no	no
CG17386	38.9515	0.737288	0.333439	0.0129446	0.020579	no	no
CG17404	0.701424	0	1.17922	1	1	no	no
CG17454	1196.95	-1.53701	0.150767	2.11912e-25	1.64867e-24	yes	no
CG1746	18249.7	-1.04398	0.0997973	3.23979e-26	2.63239e-25	yes	no
CG17470	5.61773	0.330798	0.925743	0.470196	0.537982	no	no
CG17475	0.072818	0	1.21818	1	NA	no	no
CG17493	2385.6	-1.12405	0.0969417	8.81737e-32	9.28268e-31	yes	no
CG17528	3649.87	-2.43485	0.082435	3.96867e-193	7.26692e-191	yes	yes
CG17544	2330.22	-1.54559	0.103528	2.15035e-51	4.08328e-50	yes	no
CG17564	0.14443	0	1.21818	1	NA	no	no
CG17568	210.332	0.470035	0.152978	0.00162512	0.00297358	no	no
CG17570	0	0	1.62753	NA	NA	no	no
CG17572	2032.38	-0.444444	0.0979158	4.5109e-06	1.08122e-05	no	no
CG17580	0.187889	0.103054	1.22735	0.778727	NA	no	no
CG17593	2091.21	-0.282351	0.0784063	0.000289752	0.000575575	no	no
CG17597	1183.97	1.9272	0.112396	6.09872e-67	1.91829e-65	yes	no
CG17598	1328.79	1.20184	0.0942499	5.10097e-38	6.88228e-37	no	no
CG17599	218.796	0.750894	0.161087	1.55168e-06	3.8845e-06	no	no
CG17625	0.407217	-0.230533	1.27015	0.540395	NA	no	no
CG17633	1.71071	0.518502	1.12346	0.267	0.330176	no	no
CG17636	0.420116	-0.0561916	1.17268	0.882033	NA	no	no
CG1764	218.015	0.119277	0.137102	0.375159	0.44524	no	no
CG17648	0	0	1.62753	NA	NA	no	no
CG17650	3.08627	0	0.935278	1	1	no	no
CG17652	131.931	-1.32787	0.228047	7.80792e-10	2.52403e-09	yes	no
CG17658	25.1338	-1.716	0.413132	2.5715e-06	6.30292e-06	yes	no
CG17669	4.11763	-0.370246	0.705866	0.417381	0.487119	no	no
CG17672	2.2693	-0.129671	0.900819	0.770098	0.817791	no	no
CG17680	241.485	-0.868594	0.142991	4.78455e-10	1.56844e-09	no	no
CG17681	107.725	0.185238	0.226383	0.388509	0.458643	no	no
CG17683	3714.47	-1.67836	0.0552025	4.81964e-204	1.17668e-201	yes	no
CG17707	1043.46	-9.68025	0.449058	3.60549e-104	2.25431e-102	yes	yes
CG17717	2.18989	-0.338104	0.979442	0.455403	0.523509	no	no
CG17737	1926.6	-0.485072	0.100433	1.04299e-06	2.642e-06	no	no
CG17738	0.790816	0.290157	1.1664	0.482732	0.550605	no	no
CG17754	444.655	1.89173	0.206142	3.71759e-21	2.34153e-20	yes	no
CG17760	7.51527	0.703936	0.802501	0.152516	0.199936	no	no
CG17765	889.501	-0.73602	0.112285	2.86842e-11	1.03203e-10	no	no
CG17776	155.987	0.0206791	0.259414	0.931988	0.953563	no	no
CG17778	49.2029	-0.023525	0.263768	0.923754	0.946362	no	no
CG17780	0.106678	0.0378927	1.21977	0.917087	NA	no	no
CG17784	0	0	1.62753	NA	NA	no	no
CG17819	0.451201	0.15266	1.18639	0.691375	NA	no	no
CG17829	123.858	0.0909531	0.209283	0.649532	0.707038	no	no
CG17834	2253.15	-1.36895	0.0850599	3.3974e-59	8.33419e-58	yes	no
CG17840	566.862	0.737196	0.107806	4.12839e-12	1.57722e-11	no	no
CG17843	439.76	-0.371703	0.13461	0.0048799	0.00832587	no	no
CG1785	478.563	0.124486	0.120306	0.293646	0.359743	no	no
CG17855	3.23185	0.707539	0.993782	0.162031	0.211061	no	no
CG1789	237.37	-0.118041	0.165898	0.464291	0.532176	no	no
CG17896	2095.83	0.653704	0.124511	9.07409e-08	2.50932e-07	no	no
CG17904	531.881	-0.0898905	0.124209	0.462234	0.530076	no	no
CG17917	0.477233	-0.376428	1.25294	0.365611	NA	no	no
CG17919	12277.3	0.148676	0.0540131	0.00576548	0.00971397	no	no
CG17944	0	0	1.62753	NA	NA	no	no
CG17959	0.14443	0	1.21818	1	NA	no	no
CG17982	181.625	1.48323	0.174415	1.94263e-18	1.06295e-17	yes	no
CG17985	330.447	0.907937	0.142529	6.61465e-11	2.31965e-10	no	no
CG17994	63.0813	-0.913305	0.298908	0.0007626	0.00144435	no	no
CG17996	116.324	0.174246	0.212496	0.390461	0.460417	no	no
CG18011	288.598	-1.9114	0.139664	1.10669e-43	1.7039e-42	yes	no
CG18031	3.05586	-0.336181	0.952648	0.46088	0.528856	no	no
CG18063	1.7766	-0.983736	1.18476	0.0751807	0.105142	no	no
CG1809	5.24568	0.924273	1.03517	0.0856141	0.118633	no	no
CG18095	2.51334	2.09638	1.78049	0.00731884	0.0121122	no	no
CG1812	283.84	-0.535217	0.153621	0.000349315	0.000688292	no	no
CG18132	0	0	1.62753	NA	NA	no	no
CG18135	2134.59	1.25092	0.130989	1.9676e-22	1.32561e-21	no	no
CG18136	55.2356	1.98834	0.39035	2.10832e-08	6.10354e-08	yes	no
CG18155	29.163	0.116296	0.342614	0.702422	0.755469	no	no
CG18179	592.759	1.66883	0.174032	8.29098e-23	5.73655e-22	yes	no
CG18190	19.9144	0.174928	0.996274	0.684677	0.739485	no	no
CG18268	81.1392	-1.19284	0.255125	5.25664e-07	1.37434e-06	yes	no
CG18269	0	0	1.62753	NA	NA	no	no
CG18273	484.846	0.18188	0.112072	0.100185	0.136645	no	no
CG18278	552.58	-0.903667	0.111083	1.46242e-16	7.25828e-16	no	no
CG18292	227.752	1.16277	0.158349	3.88791e-14	1.69935e-13	no	no
CG1835	6.22498	-1.1932	0.974156	0.0339155	0.0504305	no	no
CG18371	1.54383	0.0529332	0.951169	0.902495	0.928203	no	no
CG1840	265.275	1.46542	0.213561	7.39559e-13	2.93704e-12	yes	no
CG18418	0	0	1.62753	NA	NA	no	no
CG18446	17.3697	1.1604	0.806166	0.027229	0.0411272	no	no
CG18449	0.631811	-0.157566	1.12301	0.69446	NA	no	no
CG18467	3.41683	0.341577	0.803362	0.461584	0.529546	no	no
CG1847	206.018	0.416649	0.159214	0.00717334	0.0118791	no	no
CG18473	6.37971	0.924452	0.732966	0.060011	0.0856322	no	no
CG18480	0.357785	0.129783	1.20245	0.730744	NA	no	no
CG1850	1.44302	-0.997131	1.26573	0.073269	0.102637	no	no
CG18507	2269.96	0.131244	0.110595	0.2295	0.288889	no	no
CG18536	6.39128	-0.3811	0.955998	0.408742	0.478562	no	no
CG18537	0.196479	0.0378934	1.21977	0.917086	NA	no	no
CG18539	0.187889	0.103054	1.22735	0.778727	NA	no	no
CG18568	0.614117	-0.351863	1.16488	0.409304	NA	no	no
CG18577	0.072818	0	1.21818	1	NA	no	no
CG18599	0	0	1.62753	NA	NA	no	no
CG18609	0.281284	-0.135043	1.23824	0.713397	NA	no	no
CG18622	266.689	-1.048	0.153179	1.9335e-12	7.53846e-12	yes	no
CG18624	792.995	1.30733	0.103393	1.61787e-37	2.10528e-36	yes	no
CG18643	54.6168	-0.637573	0.263987	0.00918965	0.0149858	no	no
CG18661	107.914	0.715985	0.225879	0.0007896	0.00149218	no	no
CG18662	2.30034	0.605657	0.962732	0.218107	0.275427	no	no
CG18666	0.072818	0	1.21818	1	NA	no	no
CG18731	214.083	-0.221871	0.167582	0.172933	0.223783	no	no
CG18766	736.272	-0.335069	0.0957577	0.000410731	0.00080344	no	no
CG18808	2.69287	-0.451539	0.856666	0.340831	0.409621	no	no
CG18810	1.93889	-0.431323	0.862423	0.360886	0.430494	no	no
CG18812	7770.93	0.97219	0.0625497	5.33711e-55	1.15457e-53	no	no
CG1885	331.462	2.02995	0.191041	1.77286e-27	1.53798e-26	yes	no
CG18858	1599.85	0.482356	0.0937587	2.05456e-07	5.5499e-07	no	no
CG18869	2.82413	1.0428	1.0673	0.0606606	0.0864388	no	no
CG1888	350.369	0.502332	0.14292	0.000325498	0.000642845	no	no
CG1890	252.801	0.290926	0.161463	0.0641121	0.0907518	no	no
CG1902	1092.26	1.03281	0.102052	1.14709e-24	8.6999e-24	no	no
CG1907	1144.25	1.05391	0.0856069	1.91016e-35	2.32622e-34	no	no
CG1909	364.706	0.283844	0.126961	0.0229935	0.0350022	no	no
CG1927	6862.34	-1.16908	0.0587614	8.01894e-89	3.73756e-87	yes	no
CG1943	974.196	1.96998	0.127784	1.11812e-54	2.36884e-53	yes	no
CG1951	634.932	0.197472	0.111858	0.073734	0.10326	no	no
CG1958	0.0939444	0.0378927	1.21977	0.917087	NA	no	no
CG1968	865.013	-0.943108	0.106127	2.02978e-19	1.16667e-18	no	no
CG1970	7919.95	-0.568502	0.0532403	8.92044e-27	7.47305e-26	no	no
CG1971	51.6341	-0.299341	0.460617	0.423879	0.493691	no	no
CG1983	258.987	0.165558	0.165407	0.303309	0.370077	no	no
CG1986	0	0	1.62753	NA	NA	no	no
CG1988	0.187889	0.103054	1.22735	0.778727	NA	no	no
CG1998	1548.16	0.177069	0.0907635	0.0491299	0.0710147	no	no
CG2004	1106.19	1.92556	0.13103	6.18377e-50	1.11634e-48	yes	no
CG2006	111.635	-0.457852	0.238043	0.0410887	0.0602752	no	no
CG2021	91.8267	-0.578475	0.246411	0.0121729	0.0194182	no	no
CG2023	244.814	0.210559	0.175525	0.215628	0.272763	no	no
CG2025	1124.25	-0.321739	0.0841517	0.000117213	0.000241443	no	no
CG2034	226.735	-0.190097	0.151256	0.198203	0.252344	no	no
CG2051	576.212	-0.737692	0.106309	2.0285e-12	7.89684e-12	no	no
CG2053	1.3816	0.364556	1.009	0.420934	0.490818	no	no
CG2059	445.073	0.643993	0.123157	1.03454e-07	2.8486e-07	no	no
CG2061	196.51	0.600568	0.171534	0.0002969	0.000588862	no	no
CG2063	357.705	-0.854529	0.143102	9.3419e-10	3.001e-09	no	no
CG2064	358.41	2.62371	0.180448	1.49992e-49	2.68884e-48	yes	yes
CG2076	2108.63	1.45449	0.14167	1.08538e-25	8.68133e-25	yes	no
CG2107	1612.26	0.041479	0.0846548	0.621614	0.68182	no	no
CG2111	1.56497	0.110367	0.908154	0.802677	0.845904	no	no
CG2113	0	0	1.62753	NA	NA	no	no
CG2124	99.6582	1.83559	0.267388	5.32249e-13	2.13859e-12	yes	no
CG2129	143.813	0.820877	0.205881	2.82483e-05	6.25881e-05	no	no
CG2135	1403.8	1.86586	0.087666	1.52359e-101	8.97869e-100	yes	no
CG2144	822.111	-0.418149	0.103431	4.32343e-05	9.34496e-05	no	no
CG2145	4360.91	1.21481	0.0835881	1.20727e-48	2.11251e-47	no	no
CG2150	100.74	1.26509	0.360383	7.12907e-05	0.000150291	no	no
CG2200	250.523	0.977683	0.167761	1.65534e-09	5.20352e-09	no	no
CG2201	2995.68	-0.328067	0.0729943	6.19283e-06	1.46114e-05	no	no
CG2224	361.648	0.630378	0.114716	2.42926e-08	7.00101e-08	no	no
CG2254	11947.6	1.73991	0.082189	1.76016e-100	1.01397e-98	yes	no
CG2263	832.844	0.40611	0.0996496	3.80634e-05	8.31137e-05	no	no
CG2267	0.363347	0.0378947	1.21977	0.917083	NA	no	no
CG2291	0	0	1.62753	NA	NA	no	no
CG2316	4696.01	-0.994934	0.164393	4.03638e-10	1.32998e-09	no	no
CG2321	65.1259	-2.18771	0.291893	3.71314e-15	1.71662e-14	yes	yes
CG2336	0.183745	0.0378934	1.21977	0.917086	NA	no	no
CG2444	2.54907	1.8499	1.56361	0.0102319	0.0165225	no	no
CG2453	248.73	-0.0255394	0.154457	0.865474	0.898782	no	no
CG2493	2357.89	-1.0714	0.113414	8.09294e-22	5.25887e-21	yes	no
CG2533	0.900522	0.525905	1.13847	0.260196	0.322853	no	no
CG2540	177.163	-0.664049	0.16741	4.22311e-05	9.16677e-05	no	no
CG2543	51.9235	-0.210467	0.296164	0.437127	0.506474	no	no
CG2556	86.133	0.530832	0.247064	0.0217919	0.0333216	no	no
CG2574	0	0	1.62753	NA	NA	no	no
CG2577	0.0939444	0.0378927	1.21977	0.917087	NA	no	no
Cg25C	1130.8	3.84654	0.149625	6.65163e-148	7.10477e-146	yes	yes
CG2604	11516.8	0.0143848	0.078274	0.853289	0.888828	no	no
CG2608	142.706	-0.502338	0.17861	0.00359554	0.00625741	no	no
CG2611	80.0863	1.40357	0.238252	4.57228e-10	1.49981e-09	yes	no
CG2614	357.38	-0.342214	0.144196	0.0152769	0.0240112	no	no
CG2617	29.3319	-1.44384	0.424557	7.805e-05	0.000163867	yes	no
CG2680	32.5953	1.60822	0.439386	2.26262e-05	5.07678e-05	yes	no
CG2681	4.85168	-2.53142	1.69553	0.00254128	0.00451931	no	no
CG2685	229.695	0.319541	0.144803	0.0240871	0.036591	no	no
CG2691	1026.01	0.0279668	0.105764	0.789121	0.833503	no	no
CG2701	755.78	0.555338	0.114416	8.43552e-07	2.16678e-06	no	no
CG2712	102.79	-0.111841	0.197551	0.555781	0.620398	no	no
CG2750	1.21398	-0.276013	1.04287	0.525241	0.591329	no	no
CG2772	13.0872	-0.754171	1.04312	0.141721	0.187317	no	no
CG2789	4792.33	1.3057	0.0895874	5.47655e-49	9.71567e-48	yes	no
CG2794	207.813	-0.0603892	0.155198	0.690064	0.74405	no	no
CG2807	2207.12	0.0172847	0.0870448	0.841396	0.878403	no	no
CG2811	284.429	1.46593	0.16793	2.76634e-19	1.5794e-18	yes	no
CG2816	79.172	-0.467703	0.407599	0.175624	0.226979	no	no
CG2818	686.157	0.234067	0.0947489	0.0126512	0.0201436	no	no
CG2837	5.77858	1.57539	1.36116	0.0166622	0.0260052	no	no
CG2852	6006.21	-0.591473	0.0729526	3.44286e-16	1.67313e-15	no	no
CG2854	4.54883	2.01383	1.29016	0.0042964	0.00738191	no	no
CG2862	999.601	-0.808662	0.100379	3.49656e-16	1.69762e-15	no	no
CG2875	190.874	0.185592	0.168081	0.255675	0.317775	no	no
CG2889	204.778	0.861772	0.173702	2.72268e-07	7.27418e-07	no	no
CG2898	11.5292	0.78326	0.648238	0.088168	0.121772	no	no
CG2901	1.9542	-0.319857	0.859593	0.488449	0.556011	no	no
CG2906	166.432	-1.23874	0.163133	4.89415e-15	2.2344e-14	yes	no
CG2909	239.666	1.27318	0.158777	1.56123e-16	7.74121e-16	yes	no
CG2911	76.3159	-0.631661	0.262845	0.00959173	0.015582	no	no
CG2918	10123.6	0.371342	0.130479	0.00375799	0.0065114	no	no
CG2921	428.856	-1.09207	0.107089	4.45306e-25	3.41779e-24	yes	no
CG2924	1098.46	-0.350122	0.0722857	1.11357e-06	2.81384e-06	no	no
CG2926	4126.07	0.210811	0.0738228	0.00408237	0.00703539	no	no
CG2931	270.016	-0.199231	0.131607	0.123303	0.164714	no	no
CG2938	545.794	0.724653	0.117657	3.85053e-10	1.27038e-09	no	no
CG2964	0.64204	-0.354991	1.29185	0.377999	0.447989	no	no
CG2972	396.596	1.45603	0.140331	3.48413e-26	2.82645e-25	yes	no
CG2990	17.9419	0.145106	0.643942	NA	NA	no	no
CG2991	2100.52	0.771579	0.116567	1.72977e-11	6.30762e-11	no	no
CG30008	15.4191	-2.0185	0.651633	8.55913e-05	0.000179186	yes	yes
CG30015	3690.26	-0.604598	0.0743844	2.85288e-16	1.39169e-15	no	no
CG30016	3.43045	-0.121297	0.928429	0.78233	0.828036	no	no
CG30022	1549.3	-0.762362	0.102694	5.5804e-14	2.40628e-13	no	no
CG30033	2152.51	0.471611	0.328536	0.108525	0.147043	no	no
CG30051	157.48	-1.71922	0.227708	3.83953e-15	1.77345e-14	yes	no
CG30053	41.7317	1.54594	0.343325	6.63541e-07	1.72165e-06	yes	no
CG30065	0.413384	-0.0558252	1.17469	0.882617	NA	no	no
CG3008	1225.95	-0.913682	0.0949489	2.22079e-22	1.49227e-21	no	no
CG30080	0	0	1.62753	NA	NA	no	no
CG30083	3.43309	-0.924463	1.15928	0.0882117	0.121772	no	no
CG30093	0.660619	0.450025	1.21817	0.306523	0.373377	no	no
CG30096	51.7913	-1.58887	0.333061	1.72529e-07	4.68764e-07	yes	no
CG30098	5.40843	0.10238	0.903477	0.81683	0.858174	no	no
CG30099	0.598846	0.0509291	1.12893	0.896196	NA	no	no
CG30101	15.2687	-2.00893	0.644647	8.1926e-05	0.00017176	yes	yes
CG30105	40.9378	0.0578834	0.384662	0.8615	0.895562	no	no
CG3011	1010.85	1.66745	0.126517	1.10009e-40	1.56672e-39	yes	no
CG30118	4323.61	0.785849	0.087044	8.15871e-20	4.79149e-19	no	no
CG30122	4042.51	0.53163	0.0554307	6.34726e-22	4.16676e-21	no	no
CG30148	131.933	-4.88968	0.3014	1.30682e-60	3.43592e-59	yes	yes
CG30152	434.889	-0.137379	0.110079	0.206387	0.261787	no	no
CG30154	99.1273	-3.26642	0.404032	3.45841e-18	1.86645e-17	yes	yes
CG3016	504.182	1.27856	0.141572	2.44005e-20	1.47525e-19	no	no
CG30172	6.28449	-0.225383	0.705798	0.617184	0.677726	no	no
CG30178	0.393417	-0.065599	1.1247	0.867173	NA	no	no
CG30183	383.768	-0.0690461	0.112539	0.534273	0.600837	no	no
CG30184	17.7957	-3.80215	0.74606	2.15454e-09	6.73556e-09	yes	yes
CG30192	0.0898009	0	1.21818	1	NA	no	no
CG30197	11400.2	0.0774544	0.090863	0.389993	0.460077	no	no
CG3021	253.759	0.30717	0.155114	0.0422872	0.0619093	no	no
CG30222	0.216042	0	1.21818	1	NA	no	no
CG30268	0.355691	0.0159684	1.21597	0.965056	NA	no	no
CG30275	0.13806	-0.135045	1.23824	0.713394	NA	no	no
CG30291	1342.63	-1.03105	0.0893485	2.13845e-31	2.21045e-30	yes	no
CG3032	64.1399	0.234128	0.250545	0.318933	0.38684	no	no
CG30324	0.470378	0.0258207	1.09886	0.948196	NA	no	no
CG30343	2.42152	-0.158355	0.91985	0.720548	0.77076	no	no
CG30349	639.029	-0.163376	0.088072	0.061506	0.0874976	no	no
CG30350	0.353445	0.158563	1.23807	0.669385	NA	no	no
CG30355	0.072818	0	1.21818	1	NA	no	no
CG30357	48.3682	-7.73803	1.20643	6.16016e-12	2.3255e-11	yes	yes
CG3036	3593.34	1.83955	0.0938816	1.64329e-86	7.39046e-85	yes	no
CG30369	0	0	1.62753	NA	NA	no	no
CG30373	287.6	-0.753543	0.136223	1.5691e-08	4.6049e-08	no	no
CG30376	0.353445	0.158563	1.23807	0.669385	NA	no	no
CG30377	907.528	-1.73022	0.425773	3.70556e-06	8.94464e-06	yes	no
CG3038	102.226	0.682621	0.229882	0.00163727	0.00299261	no	no
CG30382	2037.28	-0.0767496	0.0766246	0.313627	0.381397	no	no
CG30383	3.34951	-3.45432	1.8624	0.000537189	0.00103307	no	no
CG30391	0.339174	-0.231949	1.27071	0.538096	NA	no	no
CG30392	334.656	-0.374886	0.122849	0.00192957	0.00349448	no	no
CG30398	297.782	11.0027	1.15162	4.88625e-23	3.41771e-22	yes	yes
CG3040	362.755	0.348765	0.112086	0.00161528	0.00295663	no	no
CG30401	0.072818	0	1.21818	1	NA	no	no
CG30411	188.983	0.044222	0.220897	0.833379	0.872165	no	no
CG30412	0.382804	0.0432951	1.17943	0.908358	NA	no	no
CG30413	0	0	1.62753	NA	NA	no	no
CG30417	0.0716119	0	1.21818	1	NA	no	no
CG30423	788.467	-0.243977	0.0825081	0.0029019	0.00511097	no	no
CG30428	483.581	-1.66255	0.11512	2.71605e-48	4.7204e-47	yes	no
CG30429	0.453148	0.037895	1.21977	0.917082	NA	no	no
CG30431	26.7112	1.39537	0.529609	0.00107156	0.0019985	no	no
CG30432	0	0	1.62753	NA	NA	no	no
CG3045	128.962	-1.21886	0.187407	1.29499e-11	4.76626e-11	yes	no
CG30479	0.359266	0	1.21818	1	NA	no	no
CG30487	0	0	1.62753	NA	NA	no	no
CG30491	314.405	-1.07322	0.140321	4.71109e-15	2.15466e-14	yes	no
CG30495	416.279	0.687589	0.15638	6.12427e-06	1.44897e-05	no	no
CG30503	564.596	3.10114	0.137584	9.07706e-115	6.55466e-113	yes	yes
CG3061	3586.22	0.109811	0.0732716	0.131831	0.175285	no	no
CG3062	0.907721	-0.666268	1.26431	0.171175	0.221676	no	no
CG3071	342.035	-0.0561914	0.1444	0.69101	0.744757	no	no
CG3077	413.665	-0.0423214	0.130179	0.740829	0.790639	no	no
CG3078	46.6521	-0.772429	0.692689	0.102171	0.139132	no	no
CG3081	2.77233	-0.502154	0.812246	0.292304	0.358269	no	no
CG3088	245794	0.868741	0.140795	2.62187e-10	8.79158e-10	no	no
CG3092	0	0	1.62753	NA	NA	no	no
CG31007	1.29644	-0.373719	0.961996	0.416286	0.486173	no	no
CG31008	0	0	1.62753	NA	NA	no	no
CG31016	0	0	1.62753	NA	NA	no	no
CG3104	506.912	2.26043	0.182464	1.75047e-36	2.20507e-35	yes	no
CG31041	3.06288	0.573169	0.875675	0.239102	0.299872	no	no
CG31050	0	0	1.62753	NA	NA	no	no
CG31051	28.3334	0.502401	0.374035	0.121594	0.162728	no	no
CG3106	2.67737	-0.280051	0.742948	0.540029	0.605849	no	no
CG31068	0.0939444	0.0378927	1.21977	0.917087	NA	no	no
CG31093	0	0	1.62753	NA	NA	no	no
CG31125	22.5768	0.21475	0.386472	0.518734	0.585159	no	no
CG31128	0	0	1.62753	NA	NA	no	no
CG31142	140.887	-1.5667	0.228317	6.64032e-13	2.64529e-12	yes	no
CG31156	339.858	-1.19588	0.143383	1.27067e-17	6.67495e-17	yes	no
CG31157	5.72323	-5.47911	1.63489	5.45887e-06	1.29873e-05	no	no
CG31174	20.2472	-5.9176	1.13178	3.50353e-09	1.07239e-08	yes	yes
CG31178	0.410785	-0.275588	1.23436	0.486034	NA	no	no
CG3119	181.22	-1.5484	0.223054	3.85111e-13	1.56455e-12	yes	no
CG31200	2625.66	3.54324	0.220998	3.27335e-60	8.51901e-59	yes	yes
CG31211	1848.91	-0.345533	0.0669245	2.1312e-07	5.7539e-07	no	no
CG31226	0.0939444	0.0378927	1.21977	0.917087	NA	no	no
CG31235	0.59884	0.0913879	1.13447	0.815392	NA	no	no
CG3124	0.635278	0.286873	1.25884	0.464908	0.532764	no	no
CG31248	283.841	-1.35144	0.317632	2.79164e-06	6.82535e-06	yes	no
CG31249	120.169	-0.505154	0.190717	0.00586525	0.00986586	no	no
CG31251	93.9574	-3.3674	0.299704	1.2314e-31	1.28845e-30	yes	yes
CG31259	0.713361	-0.110702	1.02305	0.79202	0.835876	no	no
CG31275	0	0	1.62753	NA	NA	no	no
CG31278	155.176	-2.32645	0.204171	2.19849e-31	2.26794e-30	yes	yes
CG31286	0.35926	0.0159684	1.21597	0.965056	NA	no	no
CG31287	4.50814	-1.32596	0.879066	0.016994	0.0264667	no	no
CG31301	649.545	-0.1063	0.0973223	0.270088	0.33348	no	no
CG31326	2969.32	1.52562	0.0947255	2.38157e-59	5.89871e-58	yes	no
CG31337	0.530574	-0.136085	1.23618	0.711849	NA	no	no
CG31345	183.061	0.172298	0.154905	0.25429	0.316367	no	no
CG31357	749.266	0.362096	0.0993518	0.000230603	0.000461476	no	no
CG31380	0.982623	0.365034	1.05983	0.413124	0.483031	no	no
CG31381	55.5159	-0.339275	0.252012	0.150414	0.197332	no	no
CG31407	0.0939444	0.0378927	1.21977	0.917087	NA	no	no
CG31437	0.0898009	0	1.21818	1	NA	no	no
CG31446	0.214836	0	1.21818	1	NA	no	no
CG31463	0.187889	0.103054	1.22735	0.778727	NA	no	no
CG31464	0	0	1.62753	NA	NA	no	no
CG31468	0	0	1.62753	NA	NA	no	no
CG31477	27.413	0.623798	0.941636	0.206879	0.262347	no	no
CG31482	3.79348	-0.572574	0.815076	0.235779	0.295921	no	no
CG3149	885.331	0.764416	0.0893599	5.79366e-18	3.09095e-17	no	no
CG31496	0.725596	0.0647261	1.05292	0.874626	0.905535	no	no
CG31522	11055.6	1.02709	0.0925597	3.38289e-29	3.17025e-28	no	no
CG31523	25600.8	0.318691	0.0692632	3.75674e-06	9.06392e-06	no	no
CG31528	0.338133	-0.0523122	1.19449	0.888234	NA	no	no
CG31546	3.03732	1.74648	1.44975	0.0116918	0.018715	no	no
CG31548	491.814	0.0932414	0.130113	0.465945	0.533713	no	no
CG31550	1299.1	-0.550219	0.0886594	3.83259e-10	1.26527e-09	no	no
CG31560	0	0	1.62753	NA	NA	no	no
CG3160	728.784	-0.291801	0.0935272	0.00164058	0.0029976	no	no
CG31609	0	0	1.62753	NA	NA	no	no
CG31612	31.3848	-2.72315	0.818561	1.2347e-05	2.82729e-05	no	no
CG3163	301.742	-0.582943	0.143286	3.14313e-05	6.92218e-05	no	no
CG31644	0.260707	0.103054	1.22735	0.778726	NA	no	no
CG31646	124.917	-1.12022	0.179852	9.76542e-11	3.37836e-10	yes	no
CG31650	348.35	-0.90412	0.133999	5.3342e-12	2.01834e-11	no	no
CG31673	450.392	0.3475	0.146984	0.0155806	0.0244361	no	no
CG31674	95.5208	-1.56526	0.302801	2.27769e-08	6.58271e-08	yes	no
CG31676	1894.95	-0.132908	0.0945074	0.155834	0.203869	no	no
CG3168	840.544	0.559109	0.114637	7.44921e-07	1.9192e-06	no	no
CG31689	3402.35	0.450622	0.107326	2.12524e-05	4.78319e-05	no	no
CG31698	0	0	1.62753	NA	NA	no	no
CG31706	74.6623	0.334632	0.267563	0.178019	0.229553	no	no
CG31708	16.2623	-0.518669	0.414927	0.137982	0.182705	no	no
CG31710	38.269	1.50276	0.447141	8.19438e-05	0.00017176	no	no
CG31728	45.7103	1.19138	0.548307	0.00559446	0.00944446	no	no
CG31730	0.072818	0	1.21818	1	NA	no	no
CG31743	5064.61	0.683819	0.0716408	7.79448e-22	5.07136e-21	no	no
CG31777	83.0761	2.33414	0.350047	1.03878e-12	4.09049e-12	yes	yes
CG31778	92.2975	0.515443	0.36629	0.106652	0.144657	no	no
CG31784	0.27612	-0.204957	1.26097	0.58322	NA	no	no
CG31787	0	0	1.62753	NA	NA	no	no
CG31788	0.0939444	0.0378927	1.21977	0.917087	NA	no	no
CG31789	0.171371	-0.135045	1.23824	0.713394	NA	no	no
CG31798	3.25237	-0.526553	0.733974	0.261753	0.324391	no	no
CG31803	3.11807	-1.23792	1.11994	0.0347649	0.0515889	no	no
CG31812	54.1851	-1.52597	0.405419	1.70068e-05	3.85471e-05	yes	no
CG31816	0.642173	0.0435303	1.1057	0.912502	0.936992	no	no
CG31819	0.171371	-0.135045	1.23824	0.713394	NA	no	no
CG31827	6.71273	2.06725	1.1043	0.00210597	0.00378721	no	no
CG31848	0.311026	-0.135043	1.23824	0.713397	NA	no	no
CG31849	22.4215	-1.48943	0.482595	0.00021842	0.000438981	yes	no
CG31851	0.072818	0	1.21818	1	NA	no	no
CG31855	185.741	-0.195989	0.154471	0.193502	0.247223	no	no
CG31862	0.106678	0.0378927	1.21977	0.917087	NA	no	no
CG31867	0	0	1.62753	NA	NA	no	no
CG31869	651.133	0.660112	0.120539	2.56737e-08	7.3866e-08	no	no
CG31870	0.072818	0	1.21818	1	NA	no	no
CG31871	3030.46	5.91197	0.13635	0	0	yes	yes
CG31875	5.52676	-1.30149	1.26875	0.0324672	0.0484315	no	no
CG31908	707.297	0.737726	0.112276	2.57278e-11	9.29571e-11	no	no
CG31910	0.295244	0.126273	1.22308	0.733484	NA	no	no
CG31913	0.966275	0.243469	1.13011	0.554824	0.61987	no	no
CG31917	421.396	0.0349621	0.114322	0.756627	0.804985	no	no
CG3192	1646.44	0.671401	0.111081	8.72566e-10	2.8048e-09	no	no
CG31922	71.9183	-3.31363	0.333648	1.47804e-25	1.15871e-24	yes	yes
CG31928	0.17829	0.0378934	1.21977	0.917086	NA	no	no
CG31933	0	0	1.62753	NA	NA	no	no
CG31937	1304.71	0.0293138	0.0820268	0.71898	0.769403	no	no
CG31949	0	0	1.62753	NA	NA	no	no
CG31950	86.4275	-0.0907004	0.211268	0.653236	0.710617	no	no
CG31957	160.707	0.317285	0.1922	0.0862228	0.119316	no	no
CG31960	1.79837	-1.28669	1.39058	0.0359424	0.0532592	no	no
CG31961	485.092	0.371436	0.123628	0.00226157	0.00404573	no	no
CG31974	29.8256	1.71687	0.519993	7.17827e-05	0.000151266	yes	no
CG31975	0.234231	0	1.21818	1	NA	no	no
CG31976	0.072818	0	1.21818	1	NA	no	no
CG3198	442.008	0.203363	0.108857	0.0586094	0.0838422	no	no
CG3199	0.13806	-0.135045	1.23824	0.713394	NA	no	no
CG31997	13426.8	-0.0479412	0.106006	0.647347	0.70496	no	no
CG31999	2604.82	-1.86836	0.123996	2.43098e-52	4.68558e-51	yes	no
CG32017	555.556	0.179638	0.19085	0.328539	0.397081	no	no
CG32023	0	0	1.62753	NA	NA	no	no
CG32032	364.762	-0.341573	0.144902	0.0159565	0.0249799	no	no
CG32036	4.61372	4.04506	1.80571	0.000152801	0.000310877	no	no
CG32037	34.021	0.637547	0.942096	0.198648	0.252847	no	no
CG32039	252.748	-1.13662	0.155519	5.35154e-14	2.31149e-13	yes	no
CG32055	13.9581	-4.98125	1.25986	6.32966e-07	1.64481e-06	yes	yes
[truncated: 4,142 more rows]
